# Supplementary material
Source: publisher figshare collection journal article supplement (https://acs.figshare.com/ndownloader/files/4160911)

# **An Asymmetric Pericyclic Cascade Approach to Spirocyclic Oxindoles**

Edward Richmond, Nicolas Duguet, Alexandra M. Z. Slawin, Tomas Lebl and  
Andrew D. Smith

*EaStCHEM, School of Chemistry, University of St Andrews, North Haugh, St Andrews, KY16 9ST, UK.*

*e-mail: ads10@st-andrews.ac.uk*

## **Supplementary Information**

|                                                                              |             |
|------------------------------------------------------------------------------|-------------|
| <b>1. General Information</b>                                                | <b>S 2</b>  |
| <b>2. General Procedures</b>                                                 | <b>S 3</b>  |
| <b>3. Achiral Nitrone Preparation</b>                                        | <b>S 4</b>  |
| <b>4. Chiral Nitrone Preparation</b>                                         | <b>S 6</b>  |
| <b>5. Achiral Oxindole Synthesis</b>                                         | <b>S 11</b> |
| <b>6. Ketene Synthesis</b>                                                   | <b>S 15</b> |
| <b>7. Spirocyclic Oxindole Synthesis</b>                                     | <b>S 20</b> |
| <b>8. Intermediate Isolation</b>                                             | <b>S 35</b> |
| <b>9. References</b>                                                         | <b>S 35</b> |
| <b>10. <sup>1</sup>H &amp; <sup>13</sup>C NMR Spectra of Novel Compounds</b> | <b>S 37</b> |

## 1. General Information

Reactions involving moisture sensitive reagents were carried out under an argon atmosphere using standard vacuum line techniques with freshly distilled solvents. All glassware used was flame dried and allowed to cool under vacuum. Solvents (THF, CH<sub>2</sub>Cl<sub>2</sub>, toluene, hexane and Et<sub>2</sub>O) were obtained anhydrous and purified by an alumina column (Mbraun SPS-800). Petroleum ether is defined as petroleum ether 40-60 °C. All other solvents and commercial reagents were used as supplied without further purification unless stated otherwise. Room temperature (rt) refers to 20-25 °C. Temperatures of 0 °C and -78 °C were obtained using ice/water and CO<sub>2</sub>(s)/acetone baths respectively. Reflux conditions were obtained using DrySyn heating apparatus and a contact thermometer. *In vacuo* refers to the use of a Büchi Rotavapor R-2000 rotary evaporator with a Vacubrand CVC2 vacuum controller or a Heidolph Laborota 4001 rotary evaporator with a vacuum controller. Analytical thin layer chromatography was performed on pre-coated aluminium plates (Kieselgel 60 F254 silica). TLC visualisation was carried out with ultraviolet light (254 nm), followed by staining with a 1% aqueous KMnO<sub>4</sub> solution. Flash column chromatography was performed on Kieselgel 60 silica in the solvent system stated. <sup>1</sup>H and <sup>13</sup>C nuclear magnetic resonance (NMR) spectra were acquired on either a Bruker Avance 300 (300 MHz, <sup>1</sup>H, 75 MHz <sup>13</sup>C), Bruker Avance II 400 (400 MHz, <sup>1</sup>H, 100 MHz, <sup>13</sup>C) or a Bruker Avance II 500 (500 MHz, <sup>1</sup>H, 125 MHz <sup>13</sup>C) spectrometer at ambient temperature in the deuterated solvent stated. All chemical shifts are quoted in parts per million (ppm) relative to the residual solvent as the internal standard. All coupling constants, *J*, are quoted in Hz. Multiplicities are indicated by: s (singlet), d (doublet), t (triplet), q (quartet), ABq (AB quartet), sept (septet), oct (octet), m (multiplet), dd (doublet of doublets), ddd (doublet of doublet of doublets), dt (doublet of triplets), dq (doublet of quartets), td (triplet of doublets), tq (triplet of quartets), qt (quartet of triplets) and qd (quartet of doublets). The abbreviation Ar is used to denote aromatic, br to denote broad and app. to denote apparent. Infrared spectra ( $\nu_{\max}$ ) were either recorded on a Perkin-Elmer Spectrum GX FT-IR spectrometer using thin-films on NaCl plates/KBr discs or a Shimadzu ATR zinc-selenide cell FTIR 8400S. Only the characteristic peaks are quoted. Melting points were recorded on an Electrothermal apparatus and are uncorrected. The abbreviation (dec) denotes decomposition. HPLC analyses were obtained on a Gilson HPLC consisting of a Gilson 305 pump, Gilson 306 pump, Gilson 811C dynamic mixer, Gilson 805 manometric module, Gilson 401C dilutor, Gilson 213XL sample injector and sample detection was performed with a Gilson 118 UV/vis detector. Separation was achieved using Chiralcel OD-H and OJ-H columns or a Chiralpak AD-H and AS-H column. Mass spectrometry (*m/z*) data were acquired by electrospray ionisation (ESI), electron impact (EI) or nanospray ionisation (NSI) either at the University of St Andrews or the EPSRC National Mass Spectrometry Service Centre, Swansea. At the University of St Andrews, low and high resolution ESI-MS were carried out on a Micromass LCT spectrometer. At the EPSRC National Mass Spectrometry Service Centre, low resolution NSI MS was carried out on a Micromass Quattro II spectrometer and high resolution NSI-MS on a Thermofisher LTQ Orbitrap XL spectrometer. Optical rotations were measured on a Perkin Elmer Precisely/Model-341 polarimeter operating at the sodium D line with a 100 mm path cell.

## 2. General Procedures

**General Procedure A for Hydroxylamine Preparation** To a stirred solution of the requisite nitro compound (1.0 eq) and Rh/C (0.05 eq) in THF (ca. 10 mL per g) at 0 °C was added hydrazine monohydrate (1.2 eq) dropwise. The reaction was stirred for 2.5 h allowing to warm to rt before being filtered through a celite plug and the residue washed with THF. The filtrate was then concentrated *in vacuo* to yield a crude solid which was purified *via* recrystallisation (CH<sub>2</sub>Cl<sub>2</sub> / petroleum ether) to yield the hydroxylamine as a white solid which was stored in the freezer.

**General Procedure B for Nitrone Preparation** To a stirred solution of the requisite nitro compound (1.0 eq), benzaldehyde (1.0 eq), NH<sub>4</sub>Cl (1.3 eq) in EtOH/H<sub>2</sub>O (1:1) at 0 °C was added zinc powder (2.0 eq) portionwise over 1 h and the reaction mixture stirred for 16 h, allowing to warm to rt. The reaction mixture was filtered through a celite plug, the filtrate collected and extracted (x4) with CH<sub>2</sub>Cl<sub>2</sub>. The combined organic phases were then dried over Na<sub>2</sub>SO<sub>4</sub>, filtered and concentrated *in vacuo* to give a crude semi-solid which was purified *via* recrystallization (CH<sub>2</sub>Cl<sub>2</sub> / petroleum ether) to give the nitrone as a white/off-white solid.

**General Procedure C for Nitrone Preparation** To a stirred solution of the requisite hydroxylamine (1.0 eq) and MgSO<sub>4</sub> (1.1 eq) in CH<sub>2</sub>Cl<sub>2</sub> was added either benzaldehyde or aldehyde **23** and the reaction stirred at rt until complete by TLC. The reaction mixture was then filtered and concentrated *in vacuo* to yield the crude product which was purified *via* column chromatography over silica (0-40% EtOAc in petroleum ether) to yield the nitrone.

**General Procedure D for Achiral Oxindole Synthesis** To a stirred solution of the requisite nitrone in dry THF (0.15 mmol / 1 mL ) under nitrogen was added the requisite ketene solution (1.0 mL) in dry THF (1 mL) and the reaction stirred at rt for 4 h. The reaction was then quenched with aq. 2M HCl (ca. 0.5 mL) and stirred for a further 15 min before being extracted with Et<sub>2</sub>O (3 × 10 mL). The combined organic phases were then washed with sat. aq. NaHCO<sub>3</sub>, dried over Na<sub>2</sub>SO<sub>4</sub>, filtered and concentrated *in vacuo* to give a crude oil which was purified by column chromatography over silica (0-40% EtOAc in petroleum ether) to yield the oxindole.

**General Procedure E for Racemic Spirocyclic Oxindole Synthesis** To a stirred solution of the requisite nitrone in dry THF (0.15 mmol / 1 mL ) under nitrogen was added dropwise a solution of the requisite ketene (1.5 eq) in dry THF (1 mL) and the reaction stirred at rt for 1 h. The reaction was then quenched with aq. 2M HCl (ca. 0.5 mL) and stirred for a further 15 min before being extracted with Et<sub>2</sub>O (3 × 10 mL). The combined organic phases were then washed with sat. aq. NaHCO<sub>3</sub>, dried over Na<sub>2</sub>SO<sub>4</sub>, filtered and concentrated *in vacuo* to give a crude oil which was purified by column chromatography over silica (0-40% EtOAc in petroleum ether) to yield the oxindole.

**General Procedure F for Asymmetric Spirocyclic Oxindole Synthesis** To a stirred solution of the requisite chiral nitrone in dry THF (0.15 mmol / 1 mL ) under nitrogen was added dropwise a solution of the requisite ketene (1.5 eq) in dry THF (1 mL) and the reaction stirred at -78 °C for 3 h. The reaction was then quenched with aq. 8M HCl (ca. 0.5 mL) and stirred for a further 4 h allowing to warm to rt before being extracted with Et<sub>2</sub>O (3 × 10 mL). The combined organic phases were then

dried over Na<sub>2</sub>SO<sub>4</sub>, washed with sat. aq. NaHCO<sub>3</sub>, filtered and concentrated *in vacuo* to give a crude oil which was purified by column chromatography over silica (0-40% EtOAc in petroleum ether) to yield the oxindole.

### 3. Achiral Nitrone Preparation

#### *N*-Phenylhydroxylamine **42**

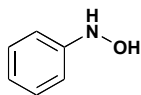

The hydroxylamine was obtained from nitrobenzene (2.00 g, 1.0 eq, 16.4 mmol), Rh/C (20 mg) and hydrazine monohydrate (0.88 mL, 1.2 eq, 19.7 mmol) in THF (20 mL) following **general procedure A** to yield **42** (1.47 g, 82%) as a white solid which was stored in the freezer; mp 82-83 °C {lit.<sup>[1]</sup> 80-81 °C}; <sup>1</sup>H NMR (400 MHz, CDCl<sub>3</sub>) δ 7.30-7.26 (2H, m, *ArH*), 7.05-7.01 (3H, m, *ArH*), 6.82 (1H, *br s*), 5.68 (1H, *br s*).

#### (*Z*)-*N*-Benzylideneaniline oxide **3**

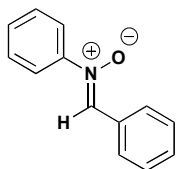

The nitrone was obtained from hydroxylamine **42** (0.309 g, 2.70 mmol), MgSO<sub>4</sub> (0.375 g, 1.1 eq, 2.97 mmol) and benzaldehyde (0.29 mL, 1.0 eq, 2.70 mmol) following **general procedure C** to yield **3** (0.34 g, 61%) as a white solid; mp 115-116 °C {lit.<sup>[2]</sup> 110 °C}; <sup>1</sup>H NMR (300 MHz, CDCl<sub>3</sub>) δ 8.42-8.39 (2H, m, *ArH*), 7.93 (1H, s, <sup>+</sup>N=CH), 7.80-7.77 (2H, m, *ArH*), 7.51-7.47 (6H, m, *ArH*).

#### *N*-(*p*-tolyl)hydroxylamine **43**

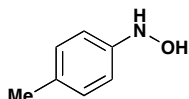

The hydroxylamine was obtained from 4-nitrotoluene (2.00 g, 1.0 eq, 14.5 mmol), Rh/C (20 mg) and hydrazine monohydrate (0.844 mL, 1.2 eq, 17.4 mmol) in THF (20 mL) following **general procedure A** to yield **43** (1.20 g, 67%) as a white solid which was stored in the freezer; mp 82-83 °C {lit.<sup>[3]</sup> 82-84 °C}; <sup>1</sup>H NMR (300 MHz, CDCl<sub>3</sub>) δ 7.10 (2H, d, *J* = 8.3, *ArH*), 6.92 (2H, d, *J* = 8.3, *ArH*), 6.70 (1H, *br s*), 5.48 (1H, *br s*), 2.30 (3H, s, *Me*).

#### (*Z*)-*N*-benzylidene-4-methylaniline oxide **9**

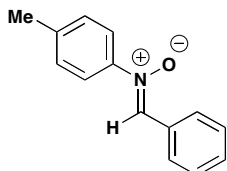

The nitrone was obtained from hydroxylamine **43** (0.234 g, 1.89 mmol), MgSO<sub>4</sub> (0.250 g, 1.1 eq, 2.08 mmol) and benzaldehyde (0.29 mL, 1.0 eq, 1.89 mmol) following **general procedure C** to yield **9** (0.340 g, 85%) as a white solid; mp 115-116 °C {lit.<sup>[4]</sup> 114-115 °C}; <sup>1</sup>H NMR (300 MHz, CDCl<sub>3</sub>) δ 8.41-8.37 (2H, m, *ArH*), 7.90 (1H, s, <sup>+</sup>N=CH), 7.67 (2H, d, *J* = 8.5, *ArH*), 7.49-7.46 (3H, m, *ArH*), 7.27 (2H, d, *J* = 7.6, *ArH*), 2.42 (3H, s, *Me*).

#### *N*-(*o*-tolyl)hydroxylamine **44**

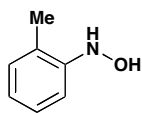

The hydroxylamine was obtained from *o*-nitrotoluene (2.00 g, 1.0 eq, 14.5 mmol), Rh/C (20 mg) and hydrazine monohydrate (0.844 mL, 1.2 eq, 17.4 mmol) in THF (20 mL) following **general procedure A** to yield **44** (1.25 g, 70%) as a white solid which was stored in the freezer; mp 36-37 °C {lit.<sup>[5]</sup> 44 °C}; <sup>1</sup>H NMR (300 MHz, CDCl<sub>3</sub>) δ 7.32-7.26 (2H, m, *ArH*), 7.13 (1H, d, *J* = 7.2, *ArH*), 6.97 (1H, td, *J* = 7.2, 1.7, *ArH*), 6.80 (1H, br s), 5.80 (1H, br s), 2.20 (3H, s, *Me*).

#### (*Z*)-*N*-benzylidene-2-methylaniline oxide **10**

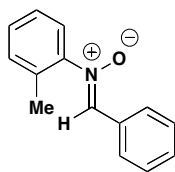

The nitron was obtained from hydroxylamine **44** (0.234 g, 1.89 mmol), MgSO<sub>4</sub> (0.250 g, 1.1 eq, 2.08 mmol) and benzaldehyde (0.29 mL, 1.0 eq, 1.89 mmol) following **general procedure C** to yield **10** (0.406 g, quant.) as a white solid; mp 115-116 °C {lit.<sup>[6]</sup> 113-115 °C}; <sup>1</sup>H NMR (300 MHz, CDCl<sub>3</sub>) δ 8.38-8.34 (2H, m, *ArH*), 7.57 (1H, s, <sup>+</sup>N=CH), 7.50-7.47 (3H, m, *ArH*), 7.39-7.30 (4H, m, *ArH*), 2.43 (3H, s, *Me*).

#### *N*-(4-Fluorophenyl)hydroxylamine **45**

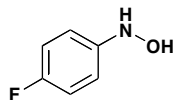

The hydroxylamine was obtained from 1-fluoro-4-nitrobenzene (7.00 g, 49.6 mmol), Rh/C (0.150 g, cat.) and hydrazine monohydrate solution (2.89 mL, 1.2 eq, 59.5 mmol) in THF (60 mL) following **general procedure A** to leave **45** (4.74 g, 92%) as a grey solid; mp 84-85 °C {lit.<sup>[7]</sup> 100 °C}; <sup>1</sup>H NMR (300 MHz, CDCl<sub>3</sub>) δ 7.03-6.99 (2H, m, *ArH*), 6.97-6.94 (3H, m, *ArH*).

#### (*Z*)-*N*-Benzylidene-4-fluoroaniline oxide **5**

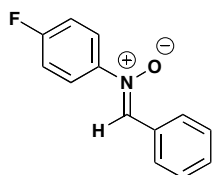

The nitron was obtained from hydroxylamine **45** (4.74 g, 37.3 mmol), MgSO<sub>4</sub> (0.500 g, 1.1 eq, mmol) and benzaldehyde (3.69 mL, 0.97 eq, 36.2 mmol) in CH<sub>2</sub>Cl<sub>2</sub> (35 mL) following **general procedure C** to yield **5** (5.17 g, 64%) as a silver solid which was used without further purification; mp 154-155 °C {lit.<sup>[8]</sup> 169.5-170.3 °C}; <sup>1</sup>H NMR (400 MHz, CDCl<sub>3</sub>) δ 8.42-8.40 (2H, m, *ArH*), 7.91 (1H, s, <sup>+</sup>N=CH), 7.83-7.80 (2H, m, *ArH*), 7.52-7.51 (3H, m, *ArH*), 7.22-7.17 (2H, m, *ArH*).

#### *N*-(4-(Trifluoromethyl)phenyl)hydroxylamine **46**

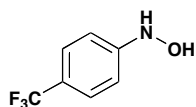

The hydroxylamine was obtained from 4-nitrobenzotrifluoride (6.00 g, 31.4 mmol), Rh/C (0.150 g, cat.) and hydrazine monohydrate solution (1.83 mL, 1.2 eq, 37.7 mmol) in THF (60

mL) following **general procedure A** to yield **46** (3.85 g, 69%) as a white solid; mp 83-84 °C; <sup>1</sup>H NMR (300 MHz, CDCl<sub>3</sub>) δ 7.53 (2H, d, *J* = 8.5, *ArH*), 7.05 (2H, d, *J* = 8.5, *ArH*).

#### (Z)-N-Benzylidene-4-(trifluoromethyl)aniline oxide **11**

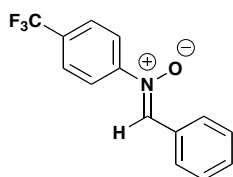

The nitron was obtained from hydroxylamine **46** (3.0 g, 16.9 mmol), MgSO<sub>4</sub> (0.400g, 1.1 eq, mmol) and benzaldehyde (1.72 mL, 0.97 eq, 16.4 mmol) following **general procedure C** to yield **11** (4.38 g, 98%) as a white solid; mp 150-151 °C {lit.<sup>[9]</sup> 54-56 °C}; <sup>1</sup>H NMR (400 MHz, CDCl<sub>3</sub>) δ 8.42-8.39 (2H, m, *ArH*), 7.91 (1H, s, <sup>+</sup>N=CH), 7.83-7.80 (2H, m, *ArH*), 7.52-7.51 (3H, m, *ArH*), 7.22-7.17 (2H, m, *ArH*).

#### N-(4-Methoxyphenyl)hydroxylamine **47**

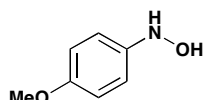

The hydroxylamine was obtained from 4-nitroaniline (1.00 g, 6.53 mmol), Rh/C (0.100 g, cat.) and hydrazine monohydrate (0.69 mL, 1.2 eq, 7.84 mmol) following **general procedure A** to yield **47** (0.505 g, 56%) as an off-white solid; mp 84-85 °C {lit.<sup>[10]</sup> 86-94 °C}; <sup>1</sup>H NMR (400 MHz, CDCl<sub>3</sub>) δ 7.03-7.00 (2H, m, *ArH*), 6.89-6.87 (2H, m, *ArH*), 5.70 (1H, *br s*), 3.81 (3H, s, OCH<sub>3</sub>).

#### (Z)-N-Benzylidene-4-methoxyaniline oxide **4**

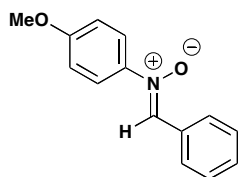

The nitron was obtained from hydroxylamine **47** (0.200 g, 1.44 mmol), MgSO<sub>4</sub> (0.191 g, 1.58 mmol) and benzaldehyde (0.15 mL, 1.44 mmol) in CH<sub>2</sub>Cl<sub>2</sub> (5 mL) following **general procedure C** to yield **4** (0.062 g, 19%) as a grey solid; mp 122-123 °C {lit.<sup>[9]</sup> 132 °C}; <sup>1</sup>H NMR (400 MHz, CDCl<sub>3</sub>) δ 8.39-8.37 (2H, m, *ArH*), 7.88 (1H, s, <sup>+</sup>N=CH), 7.75-7.72 (2H, m, *ArH*), 7.47 (3H, tdd, *J* = 5.4, 3.1, 2.2, *ArH*), 6.99-6.95 (2H, m, *ArH*), 3.87 (1H, s, OCH<sub>3</sub>).

## 4. Chiral Nitron Preparation

#### (S)-Methyl 2-amino-3-hydroxypropanoate hydrochloride **48**

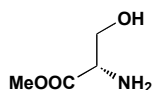

**HCl** To a stirred solution of (*L*)-Serine (20.00 g, 0.19 mol) in MeOH (425 mL) cooled to < 0 °C using a salted ice bath was added thionyl chloride (69.0 mL, 6.0 eq, 1.14 mol) dropwise and the reaction stirred for 16 h allowing to warm to rt. The reaction mixture was then concentrated *in vacuo* and the residue taken up in Et<sub>2</sub>O (200 mL) before being cooled with an ice bath to allow formation of a white precipitate. This precipitate was filtered and washed with cold Et<sub>2</sub>O (3 × 50 mL) to yield **48** (28.70 g, 97%) as a white solid; mp 157-158 °C {lit.<sup>[11]</sup> 163-165 °C}; [ $\alpha$ ]<sub>D</sub><sup>20</sup> +3.9 (*c* = 1.14, MeOH)

{lit.<sup>[11]</sup>  $[\alpha]_D^{25} +3.7$  ( $c = 4.00$ , MeOH)};  $^1\text{H}$  NMR (300 MHz,  $\text{D}_2\text{O}$ )  $\delta$  4.29 (1H, t,  $J = 3.8$ ,  $\text{CH}(\text{NH}_2)$ ), 4.08 (2H, dq,  $J = 12.5, 3.8$ ,  $\text{CH}_2\text{OH}$ ), 3.87 (3H, s,  $\text{COOMe}$ ).

**(S)-Methyl 3-hydroxy-2-(2,4,6-triisopropylphenylsulfonamido)propanoate 49**

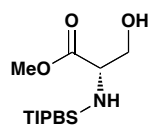

To a stirred solution of **48** (4.67 g, 0.030 mol) in  $\text{CH}_2\text{Cl}_2$  (60 mL) was added dropwise  $\text{Et}_3\text{N}$  (9.98 mL, 2.4 eq, 0.07 mol) at 0 °C and the reaction mixture stirred for 5 min at 0 °C. After this time, 2,4,6-triisopropylbenzenesulfonyl chloride was added in one portion and the reaction stirred for 16 h allowing to warm to rt. The reaction was quenched with  $\text{H}_2\text{O}$  (100 mL) before being extracted with  $\text{CH}_2\text{Cl}_2$  ( $3 \times 120$  mL). The combined organic layers were then washed in succession with sat. aq.  $\text{NaHCO}_3$  (100 mL), 10% citric acid solution (100 mL),  $\text{H}_2\text{O}$  (100 mL) and brine (100 mL) before being dried over  $\text{MgSO}_4$ , filtered and concentrated *in vacuo* to yield **49** (11.23 g, 97%) as an off-white solid; mp 109-111 °C;  $[\alpha]_D^{20} +4.3^\circ$  ( $c = 0.91$ ,  $\text{CHCl}_3$ );  $\nu_{\text{max}}$   $\text{cm}^{-1}$  (KBr) 3359 (N-H), 3356 (O-H), 2959 (C-H), 1733 (C=O);  $^1\text{H}$  NMR (400 MHz,  $\text{CDCl}_3$ )  $\delta$  7.17 (2H, s,  $\text{ArH}$ ), 4.12-4.06 (3H, m,  $o$ - $i\text{PrH}$  &  $\text{CHNR}$ ), 3.91-3.90 (2H, m,  $\text{CH}_2$ ), 3.66 (3H, s,  $\text{COOMe}$ ), 2.90 (1H, dt,  $J = 13.8, 6.9$ ), 1.29-1.24 (18H, m,  $i\text{PrCH}_3$ );  $^{13}\text{C}$  NMR (75 MHz,  $\text{CDCl}_3$ )  $\delta$  170.4 (C=O), 153.3 ( $4^{\text{r}}\text{ArC}(p$ - $i\text{Pr})$ ), 150.3 ( $4^{\text{r}}\text{ArC}(o$ - $i\text{Pr})$ ), 132.2 ( $4^{\text{r}}\text{ArCSO}_2$ ), 124.0 ( $\text{ArCH}$ ), 101.3 ( $\text{CMe}_2$ ), 63.7 ( $\text{CH}(\text{COOMe})$ ), 57.2 ( $\text{CH}_2$ ), 53.0 ( $\text{COOMe}$ ), 34.2 ( $p$ - $i\text{PrC}(\text{CH}_3)_2$ ), 30.0 ( $o$ - $i\text{PrC}(\text{CH}_3)_2$ ), 24.9 ( $\text{CMe}_2$ , d,  $J = 12.9$ ), 23.6 ( $i\text{PrC}(\text{CH}_3)_2$ ), 23.6 ( $i\text{PrC}(\text{CH}_3)_2$ );  $m/z$  ( $\text{EI}^+$ ) 386 ( $[\text{M}+\text{H}]^+$ , 100%); HRMS ( $\text{EI}^+$ )  $\text{C}_{19}\text{H}_{32}\text{O}_5\text{NS}^+$  ( $[\text{M}+\text{H}]^+$ ) found 386.1998 requires 386.1996 (+ 0.2 ppm).

**(S)-Methyl 2,2-dimethyl-3-((2,4,6-triisopropylphenyl)sulfonyl)oxazolidine-4-carboxylate 50**

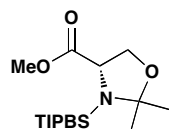

To a stirred solution of **49** (5.78 g, 0.015 mol) and pyridinium *para*-toluenesulfonate (0.94 g, 0.25 eq, 3.75 mmol) in toluene (200 mL) was added 2,2-dimethoxypropane (27.7 mL, 15.0 eq, 0.225 mol) and the reaction stirred at 80 °C for 16 h. After cooling, the reaction mixture was concentrated *in vacuo* to yield a crude light-brown oil which was purified by column chromatography over silica (petroleum ether / EtOAc 100:0 to 80:20) to yield **50** (3.00 g, 47 %) as a white solid; mp 106-107 °C;  $[\alpha]_D^{20} -32.8^\circ$  ( $c = 1.02$ ,  $\text{CHCl}_3$ );  $\nu_{\text{max}}$   $\text{cm}^{-1}$  (KBr) 2963 (C-H), 1763 (C=O);  $^1\text{H}$  NMR (300 MHz,  $\text{CDCl}_3$ )  $\delta$  7.15 (2H, s,  $\text{ArH}$ ), 4.40 (1H, dd,  $J = 7.4, 2.1$ ,  $1 \times \text{CH}_2$ ), 4.31-4.24 (3H, m,  $\text{CHNR}$  &  $o$ - $i\text{PrH}$ ), 4.06 (1H, dd,  $J = 9.2, 2.1$ ,  $1 \times \text{CH}_2$ ), 3.23 (3H, s,  $\text{COOMe}$ ), 2.89 (1H, dt,  $J = 13.8, 6.9$ ,  $p$ - $i\text{PrH}$ ), 1.80 (6H, d,  $J = 11.6$ ), 1.30-1.22 (18H, m,  $i\text{PrCH}_3$ );  $^{13}\text{C}$  NMR (75 MHz,  $\text{CDCl}_3$ )  $\delta$  170.4 (C=O), 153.8 ( $4^{\text{r}}\text{ArC}(p$ - $i\text{Pr})$ ), 151.8 ( $4^{\text{r}}\text{ArC}(o$ - $i\text{Pr})$ ), 131.9 ( $4^{\text{r}}\text{ArCSO}_2$ ), 100.7 ( $\text{CMe}_2$ ), 67.5 ( $\text{CH}(\text{COOMe})$ ), 59.1 ( $\text{CH}_2\text{OR}$ ), 51.9 ( $\text{COOMe}$ ), 34.2 ( $p$ - $i\text{PrC}(\text{CH}_3)_2$ ), 29.5 ( $o$ - $i\text{PrC}(\text{CH}_3)_2$ ), 27.6 ( $p$ - $i\text{PrC}(\text{CH}_3)_2$ ), 24.8 ( $\text{CMe}_2$ , d,  $J = 6.7$ ), 23.6 ( $o$ - $i\text{PrC}(\text{CH}_3)_2$ );  $m/z$  ( $\text{EI}^+$ ) 426 ( $[\text{M}+\text{H}]^+$ , 100%); HRMS ( $\text{EI}^+$ )  $\text{C}_{22}\text{H}_{36}\text{O}_5\text{NS}^+$  ( $[\text{M}+\text{H}]^+$ ) found 426.2312 requires 426.2309 (+ 0.3 ppm).

**(R)-(2,2-Dimethyl-3-((2,4,6-triisopropylphenyl)sulfonyl)oxazolidin-4-yl)methanol 51**

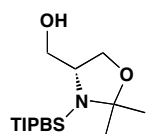

To a stirred solution of **50** (2.55 g, 6.00 mmol) in THF (18 mL) was added dropwise LiAlH<sub>4</sub> (2.0M in THF) (4.50 mL, 1.5 eq, 9.00 mmol) at 0 °C, and the reaction stirred at 0 °C for 30 min. The reaction was then quenched with dropwise addition of H<sub>2</sub>O (1 mL), followed by addition of 40% KOH (1 mL), H<sub>2</sub>O (3 mL) and EtOAc (5 mL). The resulting slurry was then stirred vigorously for 1 hr allowing to warm to rt before being filtered through a celite plug and the residue washed with EtOAc (30 mL). The reaction mixture was then dried over MgSO<sub>4</sub> before being filtered and concentrated *in vacuo* to yield **51** (2.39 g, quant.) as a very viscous colourless oil which crystallised as a white solid on standing; mp 80-82 °C;  $[\alpha]_D^{20} +5.5^\circ$  ( $c = 1.01$ , CHCl<sub>3</sub>);  $\nu_{\max}$  cm<sup>-1</sup> (thin-film) 3527 (O-H), 2960 (C-H); <sup>1</sup>H NMR (300 MHz, C<sub>6</sub>D<sub>6</sub>)  $\delta$  7.18 (2H, s, ArH), 4.67 (2H, dt,  $J = 13.6, 6.8$ , *o*-iPrH), 3.87-3.80 (3H, m, CH<sub>2</sub> & CHNR), 2.92 (1H, t,  $J = 9.3$ , 1 × CH<sub>2</sub>OH), 2.70-2.58 (2H, m, *p*-iPrH & 1 × CH<sub>2</sub>OH), 1.88 (3H, s, CMe), 1.77 (3H, s, CMe), 1.36 (3H, d,  $J = 6.8$ , *o*-iPrCH<sub>3</sub>), 1.30 (3H, d,  $J = 6.8$ , *o*-iPrCH<sub>3</sub>), 1.09 (3H, d,  $J = 6.9$ , *p*-iPrCH<sub>3</sub>); <sup>13</sup>C NMR (75 MHz, C<sub>6</sub>D<sub>6</sub>)  $\delta$  153.7 (4<sup>ν</sup>ArC), 151.9 (4<sup>ν</sup>ArC), 134.2 (4<sup>ν</sup>ArCSO<sub>2</sub>), 124.3 (ArCH), 99.8 (CMe<sub>2</sub>), 66.2 (CH<sub>2</sub>), 62.8 (CH(CH<sub>2</sub>OH)), 59.0 (CH<sub>2</sub>OH), 34.3 (*p*-iPrC(CH<sub>3</sub>)), 29.3 (*o*-iPrC(CH<sub>3</sub>)<sub>2</sub>), 28.8 (*p*-iPrC(CH<sub>3</sub>)<sub>2</sub>), 25.0 (CMe), 24.8 (CMe), 23.6 (*o*-iPrC(CH<sub>3</sub>)), 23.6 (*o*-iPrC(CH<sub>3</sub>));  $m/z$  (EI<sup>+</sup>) 398 ([M+H]<sup>+</sup>, 100%); HRMS (EI<sup>+</sup>) C<sub>21</sub>H<sub>36</sub>O<sub>4</sub>NS<sup>+</sup> ([M+H]<sup>+</sup>) found 398.2363 requires 398.2360 (+ 0.3 ppm).

**(S)-2,2-Dimethyl-3-((2,4,6-triisopropylphenyl)sulfonyl)oxazolidine-4-carbaldehyde 23**

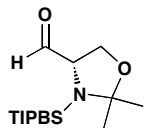

A solution of DMSO (1.43 mL, 4.0 eq, 201 mmol) in CH<sub>2</sub>Cl<sub>2</sub> (25 mL) was added dropwise to a stirred solution of oxalyl chloride (0.88 mL, 2.0 eq, 101 mmol) in CH<sub>2</sub>Cl<sub>2</sub> (15 mL) cooled to -78 °C using a dry ice/acetone bath and stirred at -78 °C for 15 min. A solution of **51** (2.00 g, 1.0 eq, 50.3 mmol) in CH<sub>2</sub>Cl<sub>2</sub> (30 mL) was then added slowly and the reaction stirred for 35 min. At -78 °C was added DIPEA (5.22 mL, 6.0 eq, 302 mmol) and the reaction mixture stirred allowing to warm to rt before being quenched with sat. aq. NH<sub>4</sub>Cl (25 mL). The organic phase was then separated and washed in succession with sat. aq. NaHCO<sub>3</sub> (30 mL) and brine (2 × 30 mL) before being dried over Na<sub>2</sub>SO<sub>4</sub>, filtered and concentrated *in vacuo* to yield **23** (2.03 g, quant.) as a viscous yellow oil which was used without further purification;  $[\alpha]_D^{20} -23.5^\circ$  ( $c = 1.22$ , CHCl<sub>3</sub>);  $\nu_{\max}$  cm<sup>-1</sup> (thin-film) 2363 (C-H), 1701 (C=O); <sup>1</sup>H NMR (300 MHz, CDCl<sub>3</sub>)  $\delta$  9.00 (1H, d,  $J = 2.7$ , CHO), 7.16 (2H, s, ArH), 4.33-4.09 (5H, m, *o*-iPrH & CH<sub>2</sub> & CHNR), 2.93-2.84 (1H, dt,  $J = 13.8, 7.1$ , *p*-iPrH), 1.81 (6H, d,  $J = 3.7$ , CMe<sub>2</sub>), 1.25 (18H, t,  $J = 7.1$ ); <sup>13</sup>C NMR (75 MHz, CDCl<sub>3</sub>)  $\delta$  199.3 (C=O), 154.6 (4<sup>ν</sup>ArC(*p*-iPr)), 151.4 (4<sup>ν</sup>ArC(*o*-iPr)), 131.6 (4<sup>ν</sup>ArCSO<sub>2</sub>), 124.4 (ArCH), 100.7 (CMe<sub>2</sub>), 65.8 (CH(CHO)), 64.6 (CH<sub>2</sub>), 34.2 (*p*-iPrC(CH<sub>3</sub>)), 29.3 (*o*-iPrC(CH<sub>3</sub>)), 27.9 (*p*-iPrC(CH<sub>3</sub>)<sub>2</sub>), 24.7 (CMe<sub>2</sub>, d,  $J = 26.8$ ), 23.5 (*p*-iPrC(CH<sub>3</sub>)<sub>2</sub>);  $m/z$  (CI<sup>+</sup>) 396 ([M+H]<sup>+</sup>, 100%); HRMS (CI<sup>+</sup>) C<sub>21</sub>H<sub>33</sub>NO<sub>4</sub>S<sup>+</sup> ([M+H]<sup>+</sup>) found 396.2209 requires 396.2209 (+ 0.1 ppm).



**(*R,Z*)-*N*-((2,2-Dimethyl-3-((2,4,6-triisopropylphenyl)sulfonyl)oxazolidin-4-yl)methylene)aniline oxide **19****

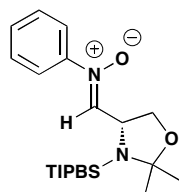

The nitron was obtained from hydroxylamine **42** (0.330 g, 1.2 eq, 30.2 mmol), MgSO<sub>4</sub> (0.334 g, 1.1 eq, 27.7 mmol) and aldehyde **23** (1.00 g, 25.2 mmol) in CH<sub>2</sub>Cl<sub>2</sub> (10 mL) following **general procedure C** to yield a crude brown semi-solid which was triturated from Et<sub>2</sub>O to yield **19** (0.558 g, 45%) as an off-white solid; mp 112-113 °C (decomp.);  $[\alpha]_D^{20}$  -12.5° (*c* = 0.97, CHCl<sub>3</sub>);  $\nu_{\max}$  cm<sup>-1</sup> (KBr) 3274 (N-O), 2958 (C-H), 2959 (C-H), 1733 (C=O); <sup>1</sup>H NMR (300 MHz, CDCl<sub>3</sub>)  $\delta$  7.32-7.27 (3H, m, PhH), 7.21 (2H, s, *i*PrArH), 7.06-7.03 (2H, m, PhH), 6.75 (1H, d, *J* = 5.3, HC=N<sup>+</sup>), 5.11 (1H, ddd, *J* = 7.2, 5.3, 1.9, CHNR), 4.51-4.23 (4H, m, CH<sub>2</sub> & *o*-iPrH), 2.89 (1H, dt, *J* = 13.8, 6.9, *p*-iPrH), 1.84 (6H, d, *J* = 3.2, diMe), 1.29-1.20 (18H, m, *i*PrCH<sub>3</sub>); <sup>13</sup>C NMR (75 MHz, CDCl<sub>3</sub>)  $\delta$  154.2 (4<sup>o</sup>ArC), 151.8 (ArC), 146.3 (4<sup>o</sup>ArC), 139.1 (ArC), 132.4 (HC=N<sup>+</sup>), 130.4 (ArC), 129.0 (ArC), 124.4 (ArC), 121.0 (ArC), 100.2 (CMe<sub>2</sub>), 68.0 (CH<sub>2</sub>), 56.1 (CHNR), 34.2 (*p*-iPrC), 29.2 (*p*-iPrCH<sub>3</sub>), 28.0 (*o*-iPrC), 25.1 (CMe<sub>2</sub>), 24.8 (CMe<sub>2</sub>), 24.6 (*o*-iPrC), 23.6 (*o*-iPrCH<sub>3</sub>); *m/z* (EI<sup>+</sup>) 487 ([M+H]<sup>+</sup>, 100%); HRMS (EI<sup>+</sup>) C<sub>27</sub>H<sub>39</sub>O<sub>4</sub>N<sub>2</sub>S<sup>+</sup> ([M+H]<sup>+</sup>) found 487.2633 requires 487.2625 (+ 0.8 ppm).

**(*R,Z*)-*N*-((2,2-dimethyl-3-((2,4,6-triisopropylphenyl)sulfonyl)oxazolidin-4-yl)methylene)-4-fluoroaniline oxide **24****

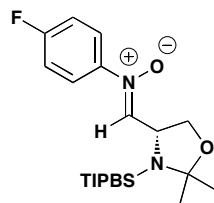

The nitron was obtained from hydroxylamine **45** (0.106 g, 83.2 mmol), MgSO<sub>4</sub> (0.091 g, 83.2 mmol) and aldehyde **23** (0.300 g, 0.91 eq, 75.7 mmol) in CH<sub>2</sub>Cl<sub>2</sub> (10 mL) following **general procedure C** to yield a crude brown foam which was purified by recrystallization from Et<sub>2</sub>O followed by trituration from petroleum ether to yield **24** as a pale orange solid in > 90% purity; mp 138-140 °C;  $[\alpha]_D^{20}$  -12.3° (*c* = 0.75, CHCl<sub>3</sub>);  $\nu_{\max}$  cm<sup>-1</sup> (thin-film) 2961, 2868, 1595, 1558, 1501, 1458; <sup>1</sup>H NMR (300 MHz, CDCl<sub>3</sub>)  $\delta$  7.19 (2H, s, ArH), 7.07-7.02 (2H, m, ArH), 6.99-6.93 (2H, m, ArH), 6.71 (1H, d, *J* = 5.1, <sup>+</sup>N=CH), 5.06 (1H, td, *J* = 5.1, 2.1, CH), 4.46 (1H, dd, *J* = 9.5, 7.3, 1 x CH<sub>2</sub>), 4.35 (2H, quint., *J* = 6.8, <sup>i</sup>PrH), 4.22 (1H, dd, *J* = 9.5, 2.1, 1 x CH<sub>2</sub>), 2.88 (1H, dt, *J* = 13.8, 6.9, <sup>i</sup>PrH), 1.83 (6H, d, *J* = 4.8, CMe<sub>2</sub>), 1.27-1.20 (18H, m, <sup>i</sup>PrCH<sub>3</sub>); <sup>13</sup>C NMR (75 MHz, CDCl<sub>3</sub>)  $\delta$  162.3 (d, *J* = 251.6), 153.2, 150.8, 141.5 (d, *J* = 3.0), 131.4, 123.3, 122.0 (d, *J* = 8.9), 114.9 (d, *J* = 23.3), 99.2, 66.9, 55.0, 33.2, 28.1, 27.0, 24.0, 23.7, 23.5, 22.6.

**(*R,Z*)-*N*-((2,2-dimethyl-3-((2,4,6-triisopropylphenyl)sulfonyl)oxazolidin-4-yl)methylene)-4-(trifluoromethyl)aniline oxide **25****

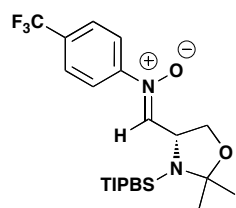

The nitronium was obtained from hydroxylamine **46** (0.268 g, 1.52 mmol), MgSO<sub>4</sub> (0.134 g, 1.11 mmol) and aldehyde **23** (0.400 g, 0.75 eq, 1.01 mmol) in CH<sub>2</sub>Cl<sub>2</sub> (15 mL) following **general procedure C** and purified by column chromatography over silica (0-30% EtOAc in petroleum ether) followed by trituration from petroleum ether to yield **25** (0.350g, 63%) as an off-white solid; mp 52-54 °C;  $[\alpha]_D^{20}$  -110.0° (*c* = 1.0, CHCl<sub>3</sub>);  $\nu_{\max}$  cm<sup>-1</sup> (thin-film) 2961, 2868, 1595, 1558, 1501, 1456; <sup>1</sup>H NMR (300 MHz, CDCl<sub>3</sub>)  $\delta$  7.26-7.21 (1H, m, ArH), 7.18 (2H, s, ArH), 7.00 (2H, d, *J* = 8.5, ArH), 6.79 (1H, d, *J* = 5.4, <sup>+</sup>N=CH), 5.12 (1H, ddd, *J* = 7.2, 5.4, 1.88, CH), 4.47 (1H, dd, *J* = 9.6, 7.3, 1 x CH<sub>2</sub>), 4.35 (2H, dt, *J* = 13.7, 6.8, iPrH), 4.22 (1H, dd, *J* = 9.6, 2.0, 1 x CH<sub>2</sub>), 2.86 (1H, dt, *J* = 13.7, 6.8, iPrH), 1.83 (6H, d, *J* = 7.8, CMe<sub>2</sub>), 1.27-1.23 (12H, m, iPrCH<sub>3</sub>), 1.17 (6H, dd, *J* = 6.8, 4.5, iPrCH<sub>3</sub>); <sup>13</sup>C NMR (100 MHz, CDCl<sub>3</sub>)  $\delta$  153.3, 150.8, 147.4, 139.2, 131.5 (app. d, *J* = 33.2), 131.3, 125.3, 123.3, 123.3 (q, *J* = 267.5), 120.5, 99.3, 66.8, 55.1, 33.2, 28.1, 27.0, 24.1, 23.7, 23.5, 22.5 (d, *J* = 2.4); *m/z* (ESI<sup>+</sup>) 577 ([M+Na]<sup>+</sup>, 100%); HRMS (ESI<sup>+</sup>) C<sub>28</sub>H<sub>37</sub>O<sub>4</sub>N<sub>2</sub>SF<sub>3</sub><sup>+</sup> ([M+Na]<sup>+</sup>) found 577.2324 requires 577.2317 (-1.2 ppm).

**(*R,Z*)-*N*-((2,2-dimethyl-3-((2,4,6-triisopropylphenyl)sulfonyl)oxazolidin-4-yl)methylene)-4-methoxyaniline oxide **26****

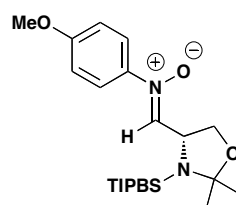

The nitronium was obtained from hydroxylamine **47** (0.116 g, 83.2 mmol), MgSO<sub>4</sub> (0.091 g, 83.2 mmol) and aldehyde **23** (0.300 g, 0.91 eq, 75.7 mmol) in CH<sub>2</sub>Cl<sub>2</sub> (10 mL) following **general procedure C** to yield a crude brown foam which was purified by recrystallization from Et<sub>2</sub>O followed by trituration from petroleum ether to yield **26** as a pale brown solid of > 90% purity; mp 103-104 °C;  $[\alpha]_D^{20}$  -64.1° (*c* = 0.90, CHCl<sub>3</sub>);  $\nu_{\max}$  cm<sup>-1</sup> (thin-film) 2961, 1595, 1558, 1501, 1457; <sup>1</sup>H NMR (500 MHz, CDCl<sub>3</sub>)  $\delta$  7.19 (2H, s, ArH), 6.96 (2H app. qd, *J* = 4.6, 3.4, ArH), 6.74 (2H, d, *J* = 9.0, ArH), 6.67 (1H, d, *J* = 5.2, <sup>+</sup>N=CH), 5.06 (1H, t, *J* = 5.2, CH), 4.45 (1H, dd, *J* = 9.3, 7.4, 1 x CH<sub>2</sub>), 4.34 (2H, dt, *J* = 13.4, 6.7, iPrH), 4.22 (1H, dd, *J* = 9.3, 1.6, 1 x CH<sub>2</sub>), 3.78 (3H, s, OMe), 2.88 (1H, dt, *J* = 13.7, 6.9, iPrH), 1.82 (6H, d, *J* = 8.4, CMe<sub>2</sub>), 1.27-1.16 (18H, m, iPrCH<sub>3</sub>); <sup>13</sup>C NMR (125 MHz, CDCl<sub>3</sub>)  $\delta$  160.9, 154.1, 151.7, 139.5, 138.0, 132.4, 127.8, 124.3, 122.3, 113.9, 100.1, 68.1, 56.0, 55.6, 34.1, 29.1, 28.0, 25.0, 24.9, 24.8, 24.6, 23.6.

**(*R,Z*)-*N*-((2,2-dimethyl-3-((2,4,6-triisopropylphenyl)sulfonyl)oxazolidin-4-yl)methylene)-4-methylaniline oxide **27****

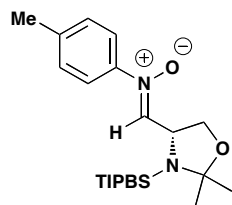

The nitron was obtained from hydroxylamine **43** (0.102 g, 83.2 mmol),  $\text{MgSO}_4$  (0.091 g, 83.2 mmol) and aldehyde **23** (0.300 g, 0.91 eq, 75.7 mmol) in  $\text{CH}_2\text{Cl}_2$  (10 mL) following **general procedure C** to yield a crude brown foam which was purified by recrystallization from  $\text{Et}_2\text{O}$  followed by trituration from petroleum ether to yield **27** (0.234 g, 56%) as an orange solid; mp 57-59 °C;  $[\alpha]_D^{20}$  -53.6° ( $c = 0.50$ ,  $\text{CHCl}_3$ );  $\nu_{\text{max}}$   $\text{cm}^{-1}$  (thin-film) 2957, 2888, 1599, 1560, 1502, 1462;  $^1\text{H}$  NMR (400 MHz,  $\text{CDCl}_3$ )  $\delta$  7.18 (2H, s, ArH), 7.06 (2H, d,  $J = 8.2$ , ArH), 6.91 (2H, d,  $J = 8.2$ , ArH), 6.70 (1H, d,  $J = 5.3$ ,  $^+\text{N}=\text{CH}$ ), 5.07 (1H, t,  $J = 5.3$ , CH), 4.46 (1H, dd,  $J = 9.3$ , 7.4, 1 x  $\text{CH}_2$ ), 4.35 (2H, dt,  $J = 13.5$ , 7.0, iPrH), 4.23 (1H, dd,  $J = 9.3$ , 1.7, 1 x  $\text{CH}_2$ ), 2.88 (1H, dt,  $J = 13.8$ , 6.9, iPrH), 2.33 (3H, s, Me), 1.83 (6H, d,  $J = 4.8$ ,  $\text{CMe}_2$ ), 1.25 (12H, t,  $J = 7.0$ , iPr $\text{CH}_3$ ), 1.21 (6H, t,  $J = 6.9$ , iPr $\text{CH}_3$ );  $^{13}\text{C}$  NMR (125 MHz,  $\text{CDCl}_3$ )  $\delta$  154.1, 151.7, 144.1, 140.7, 138.5, 132.4, 129.5, 124.3, 120.8, 100.1, 68.1, 56.0, 34.2, 29.1, 28.0, 25.0, 24.8, 24.6, 23.6, 23.6, 21.1.

**(*R,Z*)-*N*-((2,2-dimethyl-3-((2,4,6-triisopropylphenyl)sulfonyl)oxazolidin-4-yl)methylene)-2-methylaniline oxide **28****

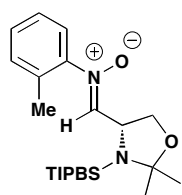

The nitron was obtained from hydroxylamine **44** (0.102 g, 83.2 mmol),  $\text{MgSO}_4$  (0.091g, 83.2 mmol) and aldehyde **23** (0.300 g, 0.91 eq, 75.7 mmol) in  $\text{CH}_2\text{Cl}_2$  (10 mL) following **general procedure C** to yield a crude brown foam which was partially purified by attempted column chromatography followed by recrystallization from  $\text{Et}_2\text{O}$ , followed by trituration from petroleum ether to yield **28** (over 100%) as an impure brown oil after obvious decomposition. Therefore in subsequent preparations, the nitron was prepared and immediately used crude in the next reaction step.

## 5. Achiral Oxindole Synthesis

### 1-Bromocyclohexanecarbonyl bromide **1**

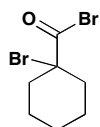

To a stirred solution of neat cyclohexanoic acid (12.0 g, 93.6 mmol) was added  $\text{PBr}_3$  (2.65 mL, 0.3 eq, 28.1 mmol) and the reaction mixture heated to 110 °C. Bromine (5.78 mL, 1.15 eq, 112 mmol) was then added dropwise until the reaction mixture retained the brown colour of the bromine. At this point, the reaction mixture was cooled, and whilst still stirring rapidly, was flushed with nitrogen into a saturated solution of sodium thiosulfate. The reaction mixture was then concentrated *in vacuo* to yield a crude pale brown liquid which was purified *via* kugelrohr distillation (120-122 °C,

1mmHg) to give **1** (10.2 g, 43%) as a yellow liquid;  $^1\text{H}$  NMR (400 MHz,  $\text{CDCl}_3$ )  $\delta$  2.22 (4H, t,  $J = 5.7$ ,  $\text{CH}_2$ ), 1.86-1.73 (2H, m,  $\text{CH}_2$ ), 1.67-1.53 (4H, m,  $\text{CH}_2$ ).

### Cyclopentamethyleneketene **2**

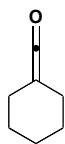

An excess of activated zinc (0.400 g) was suspended in THF (20 mL) at 0 °C. To this was added a solution of **1** (1.20 g, 4.45mmol) in THF (5 mL) dropwise over 30 mins. The reaction mixture was stirred at 0 °C for 30 min before a yellowy/green colour became apparent, stirring ceased and the reaction mixture allowed to settle. Ketene **2** was then used as an unquantified solution in THF in the next reaction.

### Spiro[cyclohexane-1,3'-indolin]-2'-one **6**

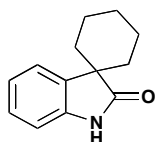

The oxindole was obtained from nitrone **3** (0.050 g, 0.254 mmol) and ketene solution **2** (3.0 mL) following **general procedure D**, to yield **6** (0.033 g, 65%) as a white solid; mp 110-111 °C {lit.<sup>[12]</sup> 119-121 °C};  $^1\text{H}$  NMR (400 MHz,  $\text{CDCl}_3$ )  $\delta$  7.79 (1H, br s,  $\text{NH}$ ), 7.45 (1H, d,  $J = 7.6$ ,  $\text{ArH}$ ), 7.21 (1H, td,  $J = 7.7$ , 1.1,  $\text{ArH}$ ), 7.03 (1H, dd,  $J = 7.6$ , 1.1,  $\text{ArH}$ ), 6.90 (1H, d,  $J = 7.7$ ,  $\text{ArH}$ ), 1.99-1.84 (4H, m,  $\text{CH}_2$ ), 1.80-1.58 (6H, m,  $\text{CH}_2$ ).

### 5'-Methoxyspiro[cyclohexane-1,3'-indolin]-2'-one **7**

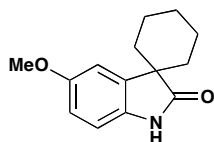

The oxindole was obtained from nitrone **4** (0.098 g, 0.431 mmol) and ketene solution **2** (5.0 mL) following **general procedure D**, to yield **7** (0.056 g, 56%) as an off-white solid; mp 208-209 °C {lit.<sup>[13]</sup> 226 °C};  $^1\text{H}$  NMR (300 MHz,  $\text{CDCl}_3$ )  $\delta$  7.45 (1H, br s,  $\text{NH}$ ), 7.05 (1H, d,  $J = 2.4$ ,  $\text{ArH}$ ), 6.79 (1H, d,  $J = 8.4$ ,  $\text{ArH}$ ), 6.73 (1H, d,  $J = 8.4$ , 2.4,  $\text{ArH}$ ), 3.80 (3H, s,  $\text{OMe}$ ), 1.96-1.82 (4H, m,  $\text{CH}_2$ ), 1.78-1.54 (6H, m,  $\text{CH}_2$ ).

### 5'-Fluorospiro[cyclohexane-1,3'-indolin]-2'-one **8**

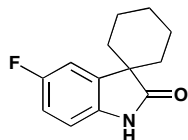

The oxindole was obtained from nitrone **5** (0.080 g, 0.372 mmol) and ketene solution **2** (4.5 mL) following **general procedure D**, to yield **8** (0.039 g, 48%) as an off-white solid; mp 101-102 °C {lit.<sup>[14]</sup> 114 °C};  $^1\text{H}$  NMR (300 MHz,  $\text{CDCl}_3$ )  $\delta$  8.40 (1H, br s,  $\text{NH}$ ), 7.18 (1H, dd,  $J = 8.7$ , 2.5,  $\text{ArH}$ ), 6.91 (1H, td,  $J = 8.7$ , 2.5,  $\text{ArH}$ ), 6.84 (1H, dd,  $J = 8.7$ , 4.6,  $\text{ArH}$ ), 1.98-1.83 (4H, m,  $\text{CH}_2$ ), 1.77-1.56 (6H, m,  $\text{CH}_2$ );  $m/z$  (ESI<sup>+</sup>) 219 ([ $\text{M}+\text{H}$ ]<sup>+</sup>, 100%); HRMS (EI<sup>+</sup>)  $\text{C}_{13}\text{H}_{15}\text{FON}^+$  ([ $\text{M}+\text{H}$ ]<sup>+</sup>) found 220.1128 requires 220.1132 (- 0.7 ppm).

### Cyclohexamethyleneketene **12**

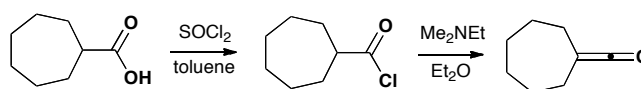

Cyclohexamethyleneketene **12** was prepared according to a literature procedure.<sup>[14]</sup> To a stirred solution of cycloheptanecarboxylic acid (5.00 g, 352 mmol) in toluene (50 mL) was added thionyl chloride (5.14 mL, 2.0 eq, 704 mmol) dropwise, and the reaction stirred at 80 °C for 16 h. The toluene and excess thionyl chloride were then removed under reduced pressure to leave a crude brown liquid which was purified *via* Kugelrohr distillation (140 °C, 3 mmHg) to yield the intermediate acid chloride (5.34 g, 94%) as a colourless liquid. To a stirred solution of acid chloride (4.00 g, 249 mmol) in dry Et<sub>2</sub>O (70 mL) under nitrogen was added dimethylethylamine (2.97 mL, 1.1 eq, 274 mmol) dropwise. The reaction was then stirred for 40 h at rt. After this time, the reaction was filtered under nitrogen to remove Et<sub>3</sub>N salts. The Et<sub>2</sub>O was then removed under reduced pressure to leave a yellow oil which was partially purified *via* Kugelrohr distillation (50 °C, 3 mmHg) to remove residual acid chloride and yield **12** as a yellow liquid which was taken up in THF (20 mL) and used immediately as a solution; <sup>1</sup>H NMR (300 MHz, CDCl<sub>3</sub>) δ 2.25-2.21 (4H, m, C=CCH<sub>2</sub>), 1.71-1.64 (4H, m, CH<sub>2</sub>), 1.62-1.52 (4H, m, CH<sub>2</sub>).

### Spiro[cycloheptane-1,3'-indolin]-2'-one **13**

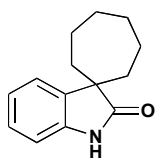

The oxindole was obtained from nitrone **3** (0.050 g, 0.254 mmol) and ketene solution **12** (1.0 mL) following **general procedure D**, to yield **13** (0.043 g, 79%) as a white solid; mp 140-142 °C;  $\nu_{\max}$  cm<sup>-1</sup> (KBr) 3165 (N-H), 2932 (C-H) 1700 (C=O); <sup>1</sup>H NMR (300 MHz, CDCl<sub>3</sub>) δ 7.66 (1H, *br s*, NH), 7.35 (1H, *dd*, *J* = 7.5, 0.4, *ArH*), 7.20 (1H, *td*, *J* = 7.7, 1.2, *ArH*), 7.03 (1H, *td*, *J* = 7.5, 1.2, *ArH*), 6.88 (1H, *dd*, *J* = 7.7, 0.4, *ArH*), 2.08-1.93 (4H, m, CH<sub>2</sub>), 1.82-1.68 (8H, m, CH<sub>2</sub>); <sup>13</sup>C NMR (75 MHz, CDCl<sub>3</sub>) δ 184.1 (C=O), 139.4 (C(3a)), 137.9 (C(7a)), 127.4 (ArC), 123.2 (ArC), 122.4 (ArC), 109.4 (ArC), 50.5 (C(3)), 36.9 (CH<sub>2</sub>), 31.3 (CH<sub>2</sub>), 23.8 (CH<sub>2</sub>); *m/z* (ESI<sup>+</sup>) 216 ([M+H]<sup>+</sup>, 100%); HRMS (EI<sup>+</sup>) C<sub>14</sub>H<sub>18</sub>ON<sup>+</sup> ([M+H]<sup>+</sup>) found 216.1383 requires 216.1383 (+ 0.0 ppm).

### 5'-Methylspiro[cycloheptane-1,3'-indolin]-2'-one **14**

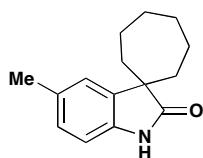

The oxindole was obtained from nitrone **9** (0.026 g, 0.123 mmol) and ketene solution **12** (1.0 mL) following **general procedure D**, to yield **14** (0.023 g, 82%) as a white solid; mp 163-164 °C;  $\nu_{\max}$  cm<sup>-1</sup> (KBr) 3162 (NH), 2920, 2852, 1698 (C=O), 1625, 1492, 1457, 1354, 1321; <sup>1</sup>H NMR (400 MHz, CDCl<sub>3</sub>) δ 7.63 (1H, *br s*, NH), 7.14 (1H, *t*, *J* = 0.6, *ArH*), 6.98 (1H, *ddd*, *J* = 7.9, 1.6, 0.6), 6.76 (1H, *d*, *J* = 7.9, *ArH*), 2.34 (3H, *s*, Me), 2.05-1.95 (4H, m, CH<sub>2</sub>), 1.79-1.71 (8H, m, CH<sub>2</sub>); <sup>13</sup>C NMR (75 MHz, CDCl<sub>3</sub>) δ 184.5, 138.0, 137.0, 131.7, 127.6, 124.0, 109.2, 50.5, 36.9, 31.4, 23.9, 21.3;

$m/z$  (ESI<sup>+</sup>) 230 ([M+H]<sup>+</sup>, 100%); HRMS (EI<sup>+</sup>) C<sub>15</sub>H<sub>20</sub>ON<sup>+</sup> ([M+H]<sup>+</sup>) found 230.1541 requires 230.1539 (+ 0.7 ppm).

#### 7'-methylspiro[cycloheptane-1,3'-indolin]-2'-one **15**

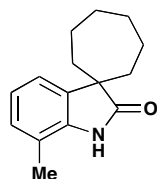

The oxindole was obtained from nitrone **10** (0.023 g, 0.109 mmol) and ketene solution **12** (1.0 mL) following **general procedure D**, to yield **15** (0.017 g, 68%) as a white solid; mp 218-221 °C;  $\nu_{\max}$  cm<sup>-1</sup> (KBr) 3155 (NH), 3097, 2963, 2904, 1719 (C=O), 1698, 1631, 1604, 1489, 1465, 1438, 1350, 1328, 1320; <sup>1</sup>H NMR (300 MHz, CDCl<sub>3</sub>)  $\delta$  7.42 (1H, br s, NH), 7.18 (1H, d,  $J$  = 7.2, ArH), 7.02-6.92 (2H, m, ArH), 2.26 (3H, s, Me), 2.06-1.91 (4H, m, CH<sub>2</sub>), 1.80-1.66 (8H, m, CH<sub>2</sub>); <sup>13</sup>C NMR (75 MHz, CDCl<sub>3</sub>)  $\delta$  184.4, 138.1, 137.5, 128.7, 122.3, 120.6, 118.6, 50.9, 37.0, 31.3, 23.8;  $m/z$  (ESI<sup>+</sup>) 230 ([M+H]<sup>+</sup>, 100%); HRMS (EI<sup>+</sup>) C<sub>15</sub>H<sub>20</sub>ON<sup>+</sup> ([M+H]<sup>+</sup>) found 230.1541 requires 230.1539 (+ 0.7 ppm).

#### 5'-Fluorospiro[cycloheptane-1,3'-indolin]-2'-one **16**

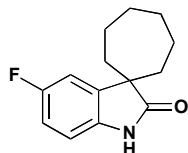

The oxindole was obtained from nitrone **5** (0.028 g, 0.130 mmol) and ketene solution **12** (1.0 mL) following **general procedure D**, to yield **16** (0.022g, 79%) as a white solid; mp 151-152°C;  $\nu_{\max}$  cm<sup>-1</sup> (KBr) 3192 (NH), 3081, 2923, 2852, 1696, 1625, 1608, 1482, 1348, 1319; <sup>1</sup>H NMR (400 MHz, CDCl<sub>3</sub>)  $\delta$  8.58 (1H, br s, NH), 7.06 (1H, dd,  $J$  = 8.4, 2.5, ArH), 6.91-6.81 (2H, m, ArH), 2.05-1.93 (4H, m, CH<sub>2</sub>), 1.78-1.69 (8H, m, CH<sub>2</sub>); <sup>13</sup>C NMR (75 MHz, CDCl<sub>3</sub>)  $\delta$  184.3 (C=O), 159.3 (C5, d,  $J$  = 239.8), 139.4 (C3a, d,  $J$  = 7.6), 135.3 (C7a), 113.6 (C4, d,  $J$  = 23.5), 111.2 (C6, d,  $J$  = 24.5), 109.9 (C7, d,  $J$  = 8.2), 51.1 (C3), 36.8, 31.3, 23.8;  $m/z$  (ESI<sup>+</sup>) 234 ([M+H]<sup>+</sup>, 100%); HRMS (EI<sup>+</sup>) C<sub>14</sub>H<sub>17</sub>FON<sup>+</sup> ([M+H]<sup>+</sup>) found 234.1291 requires 234.1289 (+ 1.0 ppm).

#### 5'-(trifluoromethyl)spiro[cycloheptane-1,3'-indolin]-2'-one **17**

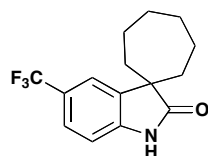

The oxindole was obtained from nitrone **11** (0.031 g, 0.117 mmol) and ketene solution **12** (1.0 mL) following **general procedure D**, to yield **17** (0.027 g, 82%) as a white solid; mp 146-147 °C;  $\nu_{\max}$  cm<sup>-1</sup> (KBr) 3168 (NH), 3076, 2900, 2847, 1712 (C=O), 1689, 1633, 1598, 1485, 1463; <sup>1</sup>H NMR (300 MHz, CDCl<sub>3</sub>)  $\delta$  7.77 (1H, br s, NH), 7.53 (1H, s, ArH), 7.48 (1H, ddd,  $J$  = 8.1, 1.7, 0.8, ArH), 6.94 (1H, d,  $J$  = 8.1, ArH), 2.07-1.94 (4H, m, CH<sub>2</sub>), 1.82-1.69 (8H, m, CH<sub>2</sub>); <sup>13</sup>C NMR (75 MHz, CDCl<sub>3</sub>)  $\delta$  183.7, 142.4, 138.3, 125.2 (d,  $J$  = 3.7), 120.1 (d,  $J$  = 3.7), 109.2, 50.5, 36.8, 31.2, 23.8;  $m/z$  (ESI<sup>+</sup>) 284 ([M+H]<sup>+</sup>, 100%); HRMS (EI<sup>+</sup>) C<sub>15</sub>H<sub>17</sub>F<sub>3</sub>ON<sup>+</sup> ([M+H]<sup>+</sup>) found 284.1255 requires 284.1257 (- 0.6 ppm).

### 5'-Methoxyspiro[cycloheptane-1,3'-indolin]-2'-one **18**

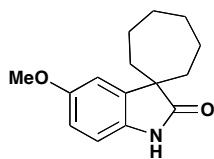

The oxindole was obtained from nitrone **4** (0.036 g, 0.158 mmol) and ketene solution **12** (1.0 mL) following **general procedure D**, to yield **18** (0.036 g, 92%) as a white solid; mp 162-163 °C;  $\nu_{\max}$   $\text{cm}^{-1}$  (KBr) 3174 (NH), 3088, 2947, 2907, 2847, 1714 (C=O), 1687, 1633, 1601, 1484, 1456, 1438, 1350, 1328, 1311;  $^1\text{H}$  NMR (300 MHz,  $\text{CDCl}_3$ )  $\delta$  7.53 (1H, *br s*, NH), 6.94 (1H, d,  $J = 2.4$ , ArH), 6.77 (1H, d,  $J = 8.4$ , ArH), 6.71 (1H, dd,  $J = 8.4, 2.4$ , ArH), 3.80 (3H, s, OMe), 2.05-1.91 (4H, m,  $\text{CH}_2$ ), 1.79-1.68 (8H, m,  $\text{CH}_2$ );  $^{13}\text{C}$  NMR (75 MHz,  $\text{CDCl}_3$ )  $\delta$  184.2, 155.7, 139.3, 132.9, 111.2, 111.0, 109.6, 55.9, 50.9, 36.9, 31.3, 23.8;  $m/z$  (ESI<sup>+</sup>) 246 ([M+H]<sup>+</sup>, 100%); HRMS (EI<sup>+</sup>)  $\text{C}_{15}\text{H}_{20}\text{O}_2\text{N}^+$  ([M+H]<sup>+</sup>) found 246.1491 requires 230.1491 (+ 1.0 ppm).

## 6. Ketene Preparation

### 1,2,3,4-Tetrahydronaphthalene-1-carboxylic acid **52**

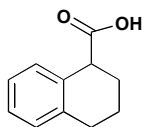

**52** was prepared according to a known two-step literature procedure<sup>[15]</sup> from 1-naphthoic acid (11.5 g, 668 mmol) and isolated as a light brown solid (3.46 g, 33% over 2 steps) which was used without any further purification and with analytical data in accordance with the literature values; mp 110-112 °C {lit.<sup>[16]</sup> 82-84 °C};  $^1\text{H}$  NMR (400 MHz,  $\text{CDCl}_3$ )  $\delta$  11.05 (1H, *br s*), 7.25-7.11 (4H, m, ArH), 3.86-3.84 (1H, m, CH), 2.89-2.73 (2H, m,  $\text{CH}_2$ ), 2.24-2.18 (1H, m, 1 x  $\text{CH}_2$ ), 2.08-1.95 (2H, m,  $\text{CH}_2$ ), 1.83-1.77 (1H, m, 1 x  $\text{CH}_2$ ).

### 1,2,3,4-Tetrahydronaphthalene-1-carbonyl chloride **53**

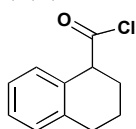

To a stirred solution of **52** (3.45 g, 1.96 mmol) in toluene (40 mL) was added thionyl chloride (2.86 mL, 2.0 eq, 3.96 mmol) and the reaction stirred at 80 °C for 5h. After this time, the reaction mixture was concentrated *in vacuo* and purified *via* Kugelrohr distillation (230 °C; 3 mmHg) {lit.<sup>[17]</sup> 142.5-143 °C; 18 mmHg}; to yield **53** (2.55 g, 67%) as a pale yellow liquid;  $^1\text{H}$  NMR (400 MHz,  $\text{CDCl}_3$ )  $\delta$  7.24-7.20 (1H, m, ArH), 7.19-7.14 (3H, m, ArH), 4.26 (1H, t,  $J = 6.1$ , CH), 2.90-2.74 (2H, m,  $\text{CH}_2$ ), 2.36 (1H, dddd,  $J = 13.4, 7.9, 5.7, 3.2$ ,  $\text{CH}_2$ ), 2.19 (1H, dddd,  $J = 13.4, 9.9, 6.5, 3.2$ ,  $\text{CH}_2$ ), 1.99-1.89 (1H, m, 1 x  $\text{CH}_2$ ), 1.87-1.80 (1H, m, 1 x  $\text{CH}_2$ ).

### 1,2,3,4-Tetrahydronaphthalene-1-ketene **20**

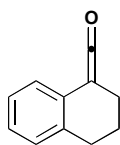

To a stirred solution of acyl chloride **53** (3.10 g, 15.9 mmol) in dry  $\text{Et}_2\text{O}$  (45 mL) at 0 °C under nitrogen was added N,N-dimethylethylamine (1.90 mL, 1.1 eq, 17.5 mmol) dropwise over 15 min. The reaction was then stirred for 16 h at 0 °C. After this time, the reaction mixture was allowed to

warm to rt before being filtered under nitrogen to remove the hydrochloride salts. The Et<sub>2</sub>O was then removed under reduced pressure to leave a yellow oil which was purified *via* Kugelrohr distillation (154-160 °C, 3 mmHg) {lit.<sup>[18]</sup> 52-53 °C; 0.001 mmHg} to yield **20** (1.14 g, 45 %) a dark yellow/orange liquid which was stored in the freezer under nitrogen and used within two weeks of preparation; <sup>1</sup>H NMR (300 MHz, CDCl<sub>3</sub>) δ 7.15-7.08 (2H, m, ArH), 7.00-6.94 (2H, m, ArH), 2.77 (2H, t, *J* = 6.2, CH<sub>2</sub>), 2.68-2.64 (2H, m, CH<sub>2</sub>), 1.96-1.87 (2H, m, CH<sub>2</sub>).

#### 6-Methoxy-3,4-dihydronaphthalen-1-yl trifluoromethanesulfonate **54**

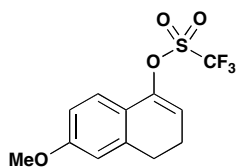

To a stirred solution of 6-methoxytetralone (12.21 g, 69.3 mmol) in THF (80 mL) at -78 °C was added LHMDs (1.0 M in THF, 69.0 mL, 1.10 eq) dropwise and the reaction mixture stirred at -78 °C for 45 min. A solution of N,N-bis(trifluoromethylsulfonyl)aniline (25.0 g, 1.01 eq, 70.0 mmol) in THF (35 mL) was then added dropwise and upon completion of addition, the reaction was warmed to 0 °C and stirred for 3 h before quenching with H<sub>2</sub>O (50 mL). The reaction mixture was then partitioned between Et<sub>2</sub>O (120 mL) and H<sub>2</sub>O (100 mL), the aqueous layer collected and extracted with Et<sub>2</sub>O (70 mL x 3). The combined organic layers were then washed with brine (150 mL), dried over MgSO<sub>4</sub>, filtered and concentrated *in vacuo* to yield a crude brown oil. The crude product was purified *via* rapid flash column chromatography over silica (20% EtOAc in petroleum ether) to yield **54** (22.6 g, quant.) as an orange oil; <sup>1</sup>H NMR (500 MHz, CDCl<sub>3</sub>) δ 7.15 (1H, s, ArH), 6.64 (1H, dd, *J* = 8.5, 2.5, ArH), 6.60 (1H, d, *J* = 2.5, ArH), 5.73 (1H, t, *J* = 4.8, CH), 3.69 (3H, s, OMe), 2.70 (2H, t, *J* = 8.1, CH<sub>2</sub>), 2.35 (2H, td, *J* = 8.1, 4.8, CH<sub>2</sub>).

#### Methyl 6-methoxy-3,4-dihydronaphthalene-1-carboxylate **55**

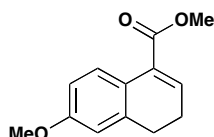

To a stirred solution of **54** (10.0 g, 32.5 mmol) in DMF (80 mL) was added sequentially MeOH (60 mL), Et<sub>3</sub>N (7.20 mL, 1.6 eq, 52.0 mmol), PPh<sub>3</sub> (3.41 g, 0.4 eq, 13.0 mmol) and Pd(OAc)<sub>2</sub> (0.73 g, 0.1 eq, 3.25 mmol) under nitrogen. A balloon of carbon monoxide gas was then introduced to the reaction, the reaction vessel purged and heated to 65 °C. The reaction vessel was then sealed under an atmosphere of carbon monoxide and heated at 65 °C for 16 h. After this time, the reaction mixture was allowed to cool to rt before being partitioned between EtOAc (250 mL) and H<sub>2</sub>O (150 mL). The layers were then separated and the organic layer washed with 1M HCl (100 mL) and brine (100 mL) before being dried over MgSO<sub>4</sub>, filtered and concentrated *in vacuo* to yield a crude brown oil which was purified by flash column chromatography over silica (20% EtOAc in petroleum ether) to yield **55** (3.03 g, 43%) as a yellow oil; <sup>1</sup>H NMR (300 MHz, CDCl<sub>3</sub>) δ 7.74 (1H, d, *J* = 8.6, ArH), 7.03 (1H, t, *J* = 4.9, CH), 6.76 (1H, dd, *J* = 8.6, 2.8, ArH), 6.72 (1H, d, *J* = 2.6, ArH), 3.84 (3H, s, OMe), 3.81 (3H, s, OMe), 2.74 (2H, t, *J* = 7.9, CH<sub>2</sub>), 2.38 (2H, ddd, *J* = 8.6, 7.2, 4.9, CH<sub>2</sub>).



### Methyl 6-methoxy-1,2,3,4-tetrahydronaphthalene-1-carboxylate **56**

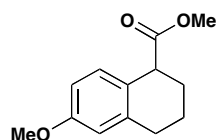

To a stirred solution of **55** (3.03 g, 13.9 mmol) in EtOH (150 mL) was added 10 mol % Pd/C (0.225 g) at rt. A balloon of hydrogen gas was then introduced to the reaction mixture, the vessel purged and then sealed before being stirred under an atmosphere of hydrogen and stirred at rt for 16 h. The reaction mixture was then filtered through a celite plug, the residue washed with EtOAc, and the filtrate concentrated *in vacuo* to yield **56** (3.01 g, quant.) as a colourless oil which was used without any further purification;  $^1\text{H}$  NMR (300 MHz,  $\text{CDCl}_3$ )  $\delta$  7.08 (1H, d,  $J = 8.5$ , ArH), 6.71 (1H, dd,  $J = 8.5$ , 2.8, ArH), 6.63 (1H, d,  $J = 2.7$ , ArH), 3.79-3.76 (1H, m, CH), 3.77 (3H, s, OMe), 3.71 (3H, s, OMe), 2.87-2.67 (2H, m,  $\text{CH}_2$ ), 2.18-2.09 (1H, m, 1 x  $\text{CH}_2$ ), 2.03-1.91 (1H, m, 1 x  $\text{CH}_2$ ), 1.80-1.69 (2H, m,  $\text{CH}_2$ ).

### 6-Methoxy-1,2,3,4-tetrahydronaphthalene-1-carboxylic acid **57**

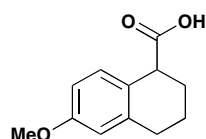

To a stirred solution of **56** (3.00 g, 13.6 mmol) in  $\text{H}_2\text{O}/\text{MeOH}$  (4/30 mL) was added LiOH (1.63 g, 5 eq., 68.0 mmol) and the reaction stirred at rt for 16 h. The reaction mixture was then concentrated *in vacuo* to give a white semi-solid which was taken up in  $\text{H}_2\text{O}$  (25 mL) and the acid precipitated by dropwise addition of 2M HCl. The white precipitate was then collected by filtration and dried under high vacuum to yield **57** (2.80 g, quant.) as a white solid; mp 78-80 °C {lit.<sup>[19]</sup> 83-84 °C};  $^1\text{H}$  NMR (300 MHz,  $\text{CDCl}_3$ )  $\delta$  7.14 (1H, d,  $J = 8.5$ , ArH), 6.73 (1H, dd,  $J = 8.5$ , 2.7, ArH), 6.64 (1H, d,  $J = 2.7$ , ArH), 3.81-3.78 (1H, m, CH), 3.78 (3H, s, OMe), 2.87-2.65 (2H, m, 1 x  $\text{CH}_2$ ), 2.24-2.09 (1H, m, 1 x  $\text{CH}_2$ ), 2.06-1.86 (2H, m,  $\text{CH}_2$ ), 1.85-1.70 (1H, m, 1 x  $\text{CH}_2$ ).

### 6-Methoxy-1,2,3,4-tetrahydronaphthalene-1-carbonyl chloride **58**

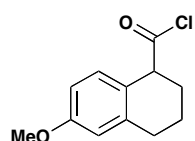

To a stirred solution of **57** (2.80 g, 13.6 mmol) in toluene (30 mL) was added DMF (0.212 mL, 0.2 eq, 2.72 mmol) followed by dropwise addition of oxalyl chloride (2.37 mL, 2.0 eq, 27.2 mmol). The reaction mixture was then stirred for 3 h at rt before being concentrated *in vacuo* multiple times with additional toluene (to remove excess oxalyl chloride) to yield **58** as a yellow oil (2.29 g, 75%) which was used without further purification;  $^1\text{H}$  NMR (300 MHz,  $\text{CDCl}_3$ )  $\delta$  7.08 (1H, d,  $J = 8.5$ , ArH), 6.75 (1H, dd,  $J = 8.5$ , 2.7, ArH), 6.66 (1H, d,  $J = 2.7$ , ArH), 4.19 (1H, t,  $J = 6.0$ , CH), 3.79 (3H, s, OMe), 2.91-2.69 (2H, m,  $\text{CH}_2$ ), 2.39-2.29 (1H, m, 1 x  $\text{CH}_2$ ), 2.21-2.10 (1H, m, 1 x  $\text{CH}_2$ ), 1.98-1.74 (2H, m,  $\text{CH}_2$ ).

### 6-Methoxy-1,2,3,4-tetrahydronaphthalene-1-ketene **59**

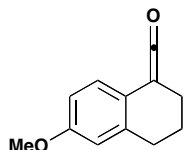

To a stirred solution of **58** (1.0 g, 4.45 mmol) in Et<sub>2</sub>O (18 mL) at 0 °C was added N,N-dimethylethylamine (0.531 mL, 1.1 eq, 4.90 mmol) dropwise and the reaction mixture stirred at 0°C for 16h. After such time, the reaction mixture was filtered under argon to remove amine hydrochloride salts and the reaction mixture concentrated under reduced pressure to yield a dark yellow oil. The crude ketene was suspended in THF (10 mL) and used as a crude solution in all further reactions. \*\*\*This ketene was not distilled, but used as a crude solution in THF assumed to be 40 mg per 1 mL of THF.\*\*\* As such, only limited spectroscopic data was obtained for this species; <sup>1</sup>H NMR (400 MHz, CDCl<sub>3</sub>) δ 6.85 (1H, d, *J* = 8.5, Ar*H*), 6.72 (1H, dd, *J* = 8.5, 2.7, Ar*H*), 6.66 (1H, d, *J* = 2.7, Ar*H*), 3.77 (3H, s, OMe), 2.73 (2H, t, *J* = 6.2, CH<sub>2</sub>), 2.64-2.61 (2H, m, CH<sub>2</sub>), 1.92-1.84 (2H, m, CH<sub>2</sub>).

### 7-Methoxy-3,4-dihydronaphthalen-1-yl trifluoromethanesulfonate **60**

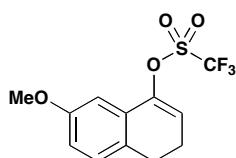

To a stirred solution of 7-methoxytetralone (12.00 g, 68.0 mmol) in THF (100 mL) at -78 °C was added LHMDs (1.0 M in THF, 74.8 mL, 1.10 eq) dropwise and the reaction mixture stirred at -78 °C for 45 min. A solution of N,N-bis(trifluoromethylsulfonyl)aniline (25.0 g, 1.01 eq, 70.0 mmol) in THF (35 mL) was then added dropwise and upon completion of addition, the reaction was warmed to 0°C and stirred for 3 h before quenching with H<sub>2</sub>O (50 mL). The reaction mixture was then partitioned between Et<sub>2</sub>O (120 mL) and H<sub>2</sub>O (100 mL), the aqueous layer collected and extracted with Et<sub>2</sub>O (70 mL x 3). The combined organic layers were then washed with brine (150 mL), dried over MgSO<sub>4</sub>, filtered and concentrated *in vacuo* to yield a crude brown oil. The crude product was purified *via* rapid flash column chromatography over silica (20% EtOAc in petroleum ether) to yield **60** (22.4 g, quant.) as an orange oil; <sup>1</sup>H NMR (300 MHz, CDCl<sub>3</sub>) δ 7.09 (1H, d, *J* = 8.2, Ar*H*), 6.91 (1H, d, *J* = 2.6, Ar*H*), 6.80 (1H, dd, *J* = 8.2, 2.6, Ar*H*), 6.03 (1H, t, *J* = 4.8, CH), 3.81 (3H, s, OMe), 2.80 (2H, *J* = 8.2, CH<sub>2</sub>), 2.53-2.45 (2H, m, CH<sub>2</sub>).

### Methyl 7-methoxy-3,4-dihydronaphthalene-1-carboxylate **61**

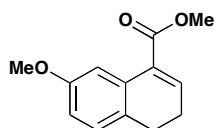

To a stirred solution of **60** (17.0 g, 55.2 mmol) in DMF (135mL) was added sequentially MeOH (110 mL), Et<sub>3</sub>N (12.24 mL, 1.6 eq, 88.3 mmol), PPh<sub>3</sub> (5.79 g, 0.4 eq, 22.1 mmol) and Pd(OAc)<sub>2</sub> (1.24 g, 0.1 eq, 5.52 mmol) under nitrogen. A balloon of carbon monoxide gas was then introduced to the reaction, the reaction vessel purged and heated to 65 °C. The reaction vessel was then sealed under an atmosphere of carbon monoxide and heated at 65 °C for 16 h. After this time, the reaction mixture was allowed to cool to rt before being partitioned between EtOAc (250 mL) and H<sub>2</sub>O (150 mL). The layers were then separated and the organic layer washed with 1M HCl (100 mL) and brine (100 mL) before being dried over MgSO<sub>4</sub>, filtered and concentrated *in vacuo* to yield a crude

brown oil which was purified by flash column chromatography over silica (20% EtOAc in petroleum ether) to yield **61** (7.43 g, 62%) as a yellow oil;  $^1\text{H}$  NMR (400 MHz,  $\text{CDCl}_3$ )  $\delta$  7.45 (1H, d,  $J = 2.7$ , ArH), 7.20 (1H, t,  $J = 4.9$ , CH), 7.07 (1H, d,  $J = 8.2$ , ArH), 6.75 (1H, dd,  $J = 8.2, 2.7$ , ArH), 3.85 (3H, s, OMe), 3.81 (3H, s, OMe), 2.70 (2H, t,  $J = 7.9$ ,  $\text{CH}_2$ ), 2.41-2.36 (2H, m,  $\text{CH}_2$ ).

#### Methyl 7-methoxy-1,2,3,4-tetrahydronaphthalene-1-carboxylate **62**

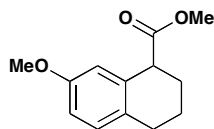

To a stirred solution of **61** (7.43 g, 34.0 mmol) in EtOH (250 mL) was added 10 mol % Pd/C (0.440 g) at rt. A balloon of hydrogen gas was then introduced to the reaction mixture, the vessel purged and then sealed before being stirred under an atmosphere of hydrogen and stirred at rt for 16 h. The reaction mixture was then filtered through a celite plug, the residue washed with EtOAc, and the filtrate concentrated *in vacuo* to yield **62** (7.40 g, quant.) as a colourless oil which was used without any further purification;  $^1\text{H}$  NMR (300 MHz,  $\text{CDCl}_3$ )  $\delta$  7.02 (1H, d,  $J = 8.3$ , ArH), 6.77-6.71 (2H, m, ArH), 3.81 (1H, t,  $J = 5.7$ , CH), 3.79 (3H, s, OMe), 3.72 (3H, s, OMe), 2.82-2.63 (2H, m,  $\text{CH}_2$ ), 2.14-2.08 (1H, m, 1 x  $\text{CH}_2$ ), 2.00-1.93 (2H, m,  $\text{CH}_2$ ), 1.79-1.73 (1H, m, 1 x  $\text{CH}_2$ ).

#### 7-Methoxy-1,2,3,4-tetrahydronaphthalene-1-carboxylic acid **63**

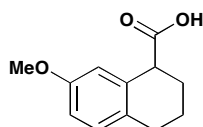

To a stirred solution of **62** (7.40 g, 33.6 mmol) in  $\text{H}_2\text{O}/\text{MeOH}$  (10/75 mL) was added LiOH (4.02 g, 5 eq., 170.2 mmol) and the reaction stirred at rt for 16 h. The reaction mixture was then concentrated *in vacuo* to give a white semi-solid which was taken up in  $\text{H}_2\text{O}$  (75 mL) and the acid precipitated by dropwise addition of 2M HCl. The white precipitate was then collected by filtration and dried under high vacuum to yield **63** (6.20 g, 89%) as a white solid; mp 120-121 °C {lit.<sup>[20]</sup> 137-138 °C};  $^1\text{H}$  NMR (300 MHz,  $\text{CDCl}_3$ )  $\delta$  7.03 (1H, d,  $J = 9.2$ , ArH), 6.78-6.75 (2H, m, ArH), 3.82 (1H, t,  $J = 5.5$ , CH), 3.77 (3H, s, OMe), 2.83-2.63 (2H, m,  $\text{CH}_2$ ), 2.22-2.11 (1H, m, 1 x  $\text{CH}_2$ ), 2.06-1.90 (2H, m,  $\text{CH}_2$ ), 1.81-1.71 (1H, m, 1 x  $\text{CH}_2$ ).

#### 7-Methoxy-1,2,3,4-tetrahydronaphthalene-1-carbonyl chloride **64**

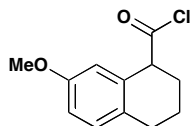

To a stirred solution of **63** (6.20 g, 30.1 mmol) in toluene (65 mL) was added DMF (0.47 mL, 0.2 eq, 6.02 mmol) followed by dropwise addition of oxalyl chloride (5.25 mL, 2.0 eq, 60.2 mmol). The reaction mixture was then stirred for 3 h at rt before being filtered and concentrated *in vacuo* multiple times with additional toluene (to remove excess oxalyl chloride) to yield **64** as a yellow oil (5.10 g, 78%) which was used without further purification;  $\nu_{\text{max}}$   $\text{cm}^{-1}$  (thin-film) 2351, 1786, 1599, 1585, 1489;  $^1\text{H}$  NMR (300 MHz,  $\text{CDCl}_3$ )  $\delta$  7.06 (1H, d,  $J = 8.5$ , ArH), 6.81 (1H, dd,  $J = 8.5, 2.6$ , ArH), 6.68 (1H, d,  $J = 2.6$ , ArH), 4.21 (1H, t,  $J = 6.1$ , CH), 3.78 (3H, s, OMe), 2.84-2.65 (2H, m,  $\text{CH}_2$ ), 2.38-2.28 (1H, m, 1 x  $\text{CH}_2$ ), 2.22-2.11 (1H, m, 1 x  $\text{CH}_2$ ), 1.99-1.74 (2H, m, 1 x  $\text{CH}_2$ );  $^{13}\text{C}$  NMR (75 MHz,  $\text{CDCl}_3$ )  $\delta$  176.0, 157.8, 131.8, 130.6, 129.3, 114.5, 114.3, 56.6, 55.4, 28.1, 26.7, 20.4.

### 7-Methoxy-1,2,3,4-tetrahydronaphthalene-1-ketene **65**

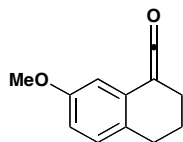

To a stirred solution of **64** (1.0 g, 4.45 mmol) in Et<sub>2</sub>O (18 mL) at 0°C was added N,N-dimethylethylamine (0.531 mL, 1.1 eq, 4.90 mmol) dropwise and the reaction mixture stirred at 0°C for 16h. After such time, the reaction mixture was filtered under argon to remove amine hydrochloride salts and the reaction mixture concentrated under reduced pressure to yield a dark yellow oil. The crude ketene was suspended in THF (10 mL) and used as a crude solution in all further reactions. \*\*\*This ketene was not distilled, but used as a crude solution in THF assumed to be 40 mg per 1 mL of THF.\*\*\* As such, only limited spectroscopic data was obtained for this species; <sup>1</sup>H NMR (400 MHz, CDCl<sub>3</sub>) δ 6.97 (1H, d, *J* = 8.4, Ar*H*), 6.54 (1H, dd, *J* = 8.4, 2.6, Ar*H*), 6.44 (1H, d, *J* = 2.6, Ar*H*), 3.75 (3H, s, OMe), 2.68 (2H, t, *J* = 6.1, CH<sub>2</sub>), 2.63-2.60 (2H, m, CH<sub>2</sub>), 1.86-1.84 (2H, m, CH<sub>2</sub>).

### 7. Asymmetric Spirocyclic Oxindoles

#### (±)-3',4'-Dihydro-2'*H*-spiro[indoline-3,1'-naphthalen]-2-one (±)**22**

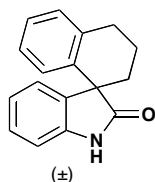

The oxindole was obtained from nitron **3** (0.050 g, 0.254 mmol) and ketene **20** (0.040 g, 0.279 mmol) following **general procedure E** to yield (±)**22** (0.047 g, 74%) as a white solid; mp 211-213 °C {lit.<sup>[21]</sup> 213-215 °C}; <sup>1</sup>H NMR (300 MHz, CDCl<sub>3</sub>) δ 8.24 (1H, br s, Ar*H*), 7.26-7.11 (3H, m, Ar*H*), 7.05-6.94 (4H, m, Ar*H*), 6.61 (1H, dd, *J* = 7.8, 0.7, Ar*H*), 3.07-2.92 (2H, m, CH<sub>2</sub>), 2.39-2.22 (2H, m, CH<sub>2</sub>), 2.07-1.97 (2H, m, CH<sub>2</sub>).

#### (*S*)-3',4'-Dihydro-2'*H*-spiro[indoline-3,1'-naphthalen]-2-one **22**

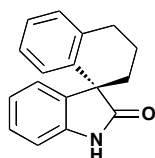

The oxindole was obtained from chiral nitron **19** (0.110g, 22.6 mmol) and ketene **20** (0.054 g, 33.9 mmol) following **general procedure F** to yield **22** (0.054 g, 96%) as an off-white solid;  $[\alpha]_D^{20} +0.8^\circ$  (*c* = 0.75, CHCl<sub>3</sub>); HPLC analysis: 98% e.e. (Daicel Chiralcel AD-H column, eluent: hexane/*i*-PrOH 95:5, flow 1.0 mL/min, wavelength: 254 nm, retention times: 18.0 min (major) and 19.6 min (minor)).

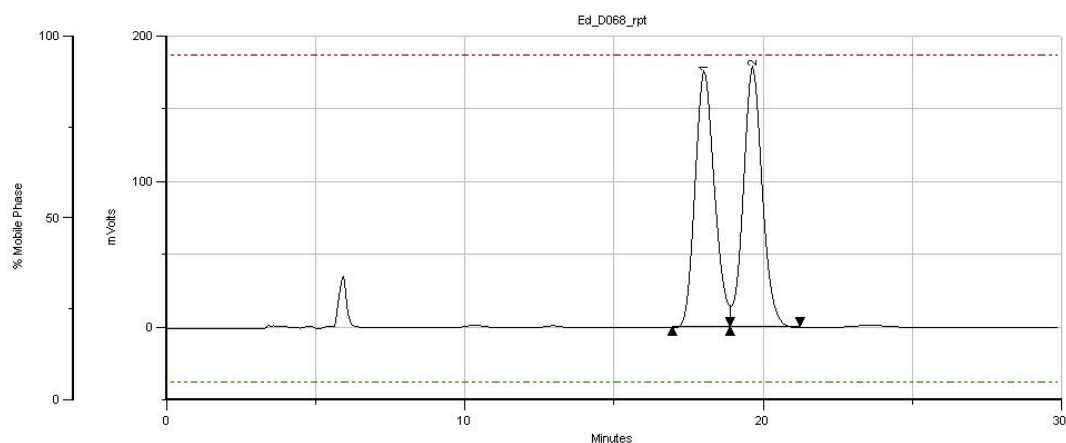

| Peak | tR (min) | Area (%) |
|------|----------|----------|
| 1    | 18.02    | 50.33    |
| 2    | 19.64    | 49.67    |

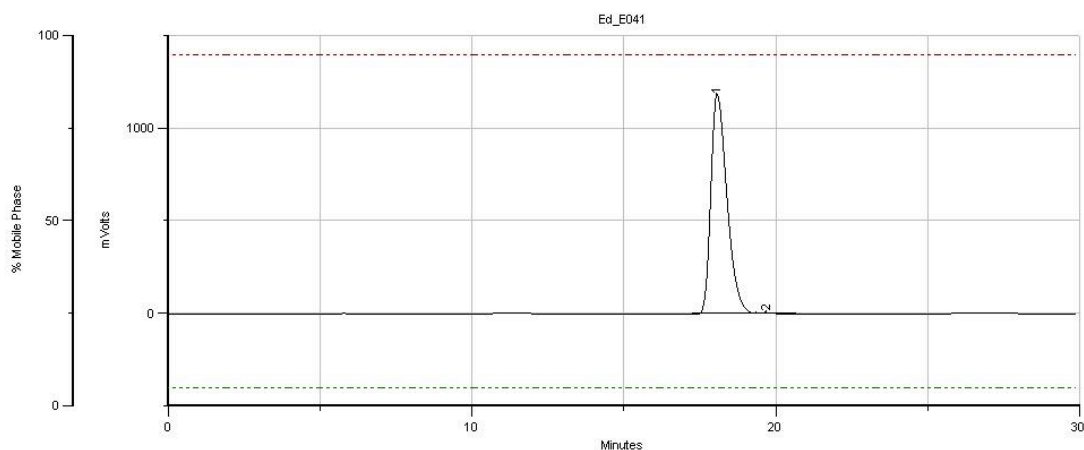

| Peak | tR (min) | Area (%) |
|------|----------|----------|
| 1    | 18.09    | 99.41    |
| 2    | 19.69    | 0.59     |

**(±)-6'-Methoxy-3',4'-dihydro-2'H-spiro[indoline-3,1'-naphthalen]-2-one (±)29**

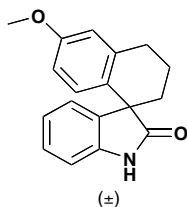

The oxindole was obtained from nitron **3** (0.084 g, 0.353 mmol) and ketene solution **59** (0.080 g, 0.425 mmol) following **general procedure E** to yield **(±)29** (0.093 g, 94%) as a white solid; mp 149-150 °C;  $\nu_{\max}$   $\text{cm}^{-1}$  (thin-film) 3130, 3080, 2934, 1697, 1620, 1499, 1474;  $^1\text{H}$  NMR (300 MHz,  $\text{CDCl}_3$ )  $\delta$  7.87 (1H, br s, *NH*), 7.21 (1H, td,  $J = 7.5, 1.5$ , *ArH*), 7.03-6.92 (3H, m, *ArH*), 6.70 (1H, d,  $J = 2.4$ , *ArH*), 6.57-6.50 (2H, m, *ArH*), 3.75 (3H, s, *OMe*), 3.04-2.88 (2H, m,  $\text{CH}_2$ ), 2.42-2.30 (1H, m, 1 x  $\text{CH}_2$ ), 2.26-2.18 (1H, m, 1 x  $\text{CH}_2$ ), 2.03-1.95 (2H, m,  $\text{CH}_2$ );  $^{13}\text{C}$  NMR (100 MHz,  $\text{CDCl}_3$ )  $\delta$

181.5, 157.4, 138.9, 138.2, 136.9, 128.2, 126.7, 126.0, 123.3, 121.8, 112.8, 112.1, 108.5, 54.2, 50.9, 33.3, 28.6, 17.7;  $m/z$  (ESI<sup>+</sup>) 280 ([M+H]<sup>+</sup>, 100%); HRMS (EI<sup>+</sup>) C<sub>18</sub>H<sub>17</sub>NO<sub>2</sub><sup>+</sup> ([M+H]<sup>+</sup>) found 280.1334 requires 280.1332 (+ 0.2 ppm).

**(S)-6'-Methoxy-3',4'-dihydro-2'H-spiro[indoline-3,1'-naphthalen]-2-one **29****

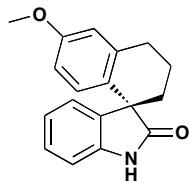

The oxindole was obtained from chiral nitrone **19** (0.104 g, 0.214 mmol) and ketene solution **59** (1.6 mL) following **general procedure F** to yield **29** (0.036 g, 85%) as an off-white solid;  $[\alpha]_D^{20}$  -8.8° ( $c = 0.50$ , CHCl<sub>3</sub>); HPLC analysis: 98% e.e. (Daicel Chiralcel AD-H column, eluent: hexane/*i*-PrOH 95:5, flow 1.0 mL/min, wavelength: 254 nm, retention times: 26.3 min (major) and 31.7 min (minor)).

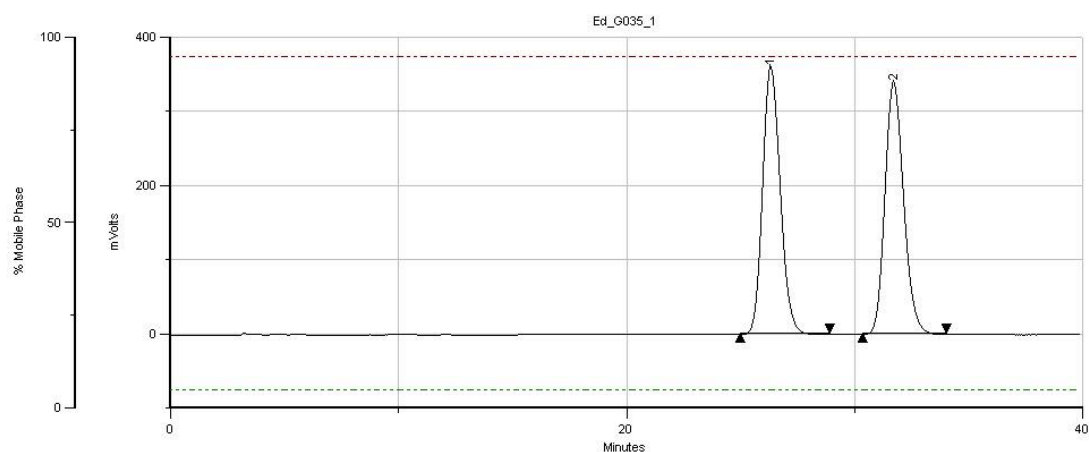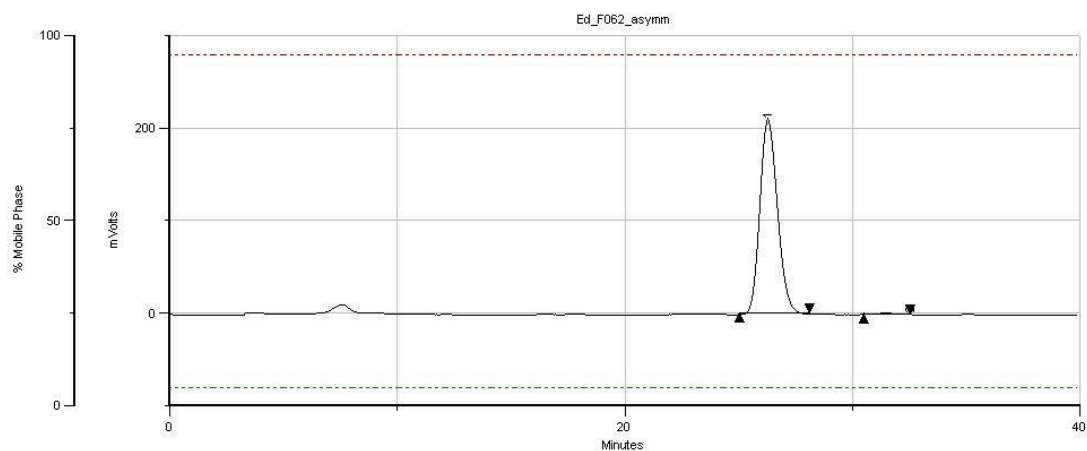

**(±)-5-Fluoro-6'-methoxy-3',4'-dihydro-2'H-spiro[indoline-3,1'-naphthalen]-2-one (±)30**

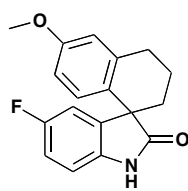

(±)

The oxindole was obtained from nitrone **5** (0.091 g, 0.353 mmol) and ketene solution **59** (0.080 g, 0.425 mmol) following **general procedure E** to yield **(±)30** (0.093 g, 89%) as a white solid; mp 71-73 °C;  $\nu_{\max}$   $\text{cm}^{-1}$  (thin-film) 3067, 2930, 1699, 1609, 1503, 1472;  $^1\text{H}$  NMR (300 MHz,  $\text{CDCl}_3$ )  $\delta$  7.80 (1H, br s, *NH*), 6.95-6.83 (2H, m, *ArH*), 6.78 (1H, dd,  $J = 8.1, 2.5$ , *ArH*), 6.70 (1H, d,  $J = 2.5$ , *ArH*), 6.60 (1H, dd,  $J = 8.6, 2.5$ , *ArH*), 6.51 (1H, d,  $J = 8.6$ , *ArH*), 3.76 (3H, s, *OMe*), 3.03-2.90 (2H, m,  $\text{CH}_2$ ), 2.42-2.30 (1H, m, 1 x  $\text{CH}_2$ ), 2.23-2.18 (1H, m, 1 x  $\text{CH}_2$ ), 2.01-1.93 (2H, m,  $\text{CH}_2$ );  $^{13}\text{C}$  NMR (125 MHz,  $\text{CDCl}_3$ )  $\delta$  183.5, 158.9 (d,  $J = 237.5$ ), 158.6, 139.5, 139.4, 139.2, 136.1, 129.2, 126.4, 114.1 (d,  $J = 25.0$ ), 114.1, 113.3, 112.0 (d,  $J = 25.0$ ), 110.5 (d,  $J = 7.9$ ), 55.2, 52.7, 34.2, 29.6, 18.7;  $m/z$  ( $\text{ESI}^+$ ) 298 ( $[\text{M}+\text{H}]^+$ , 100%); HRMS ( $\text{EI}^+$ )  $\text{C}_{18}\text{H}_{16}\text{FNO}_2^+$  ( $[\text{M}+\text{H}]^+$ ) found 298.1241 requires 280.1238 (+ 0.3 ppm).

**(S)-5-Fluoro-6'-methoxy-3',4'-dihydro-2'H-spiro[indoline-3,1'-naphthalen]-2-one 30**

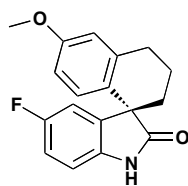

The oxindole was obtained from chiral nitrone **24** (0.108 g, 0.214 mmol) and ketene solution **59** (1.6 mL) following **general procedure F** to yield **30** (0.063 g, 99%) as a white solid;  $[\alpha]_D^{20}$  -6.7° ( $c = 0.55$ ,  $\text{CHCl}_3$ ); HPLC analysis: 98% e.e. (Daicel Chiralcel AD-H column, eluent: hexane/*i*-PrOH 95:5, flow 1.0 mL/min, wavelength: 254 nm, retention times: 23.3 min (major) and 30.1 min (minor)).

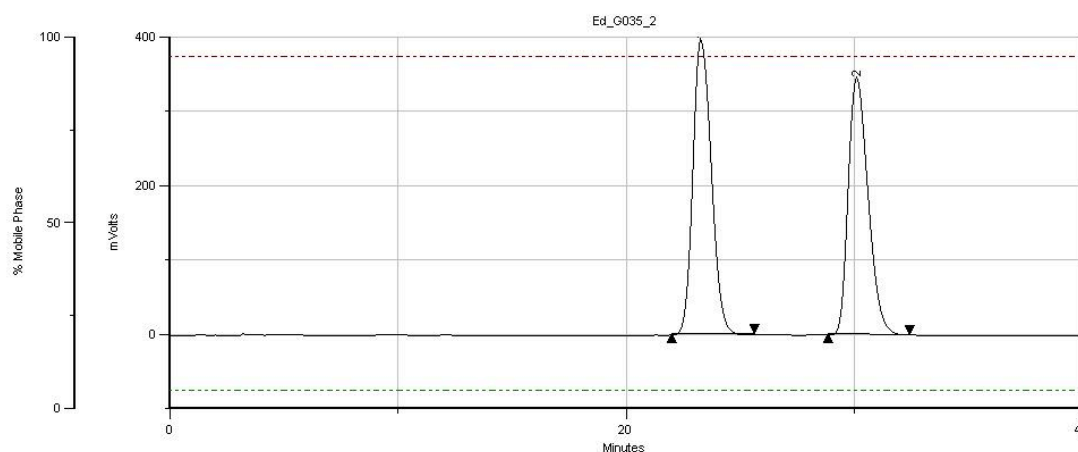

| Peak | tR (min) | Area (%) |
|------|----------|----------|
| 1    | 23.28    | 51.67    |
| 2    | 30.12    | 48.33    |

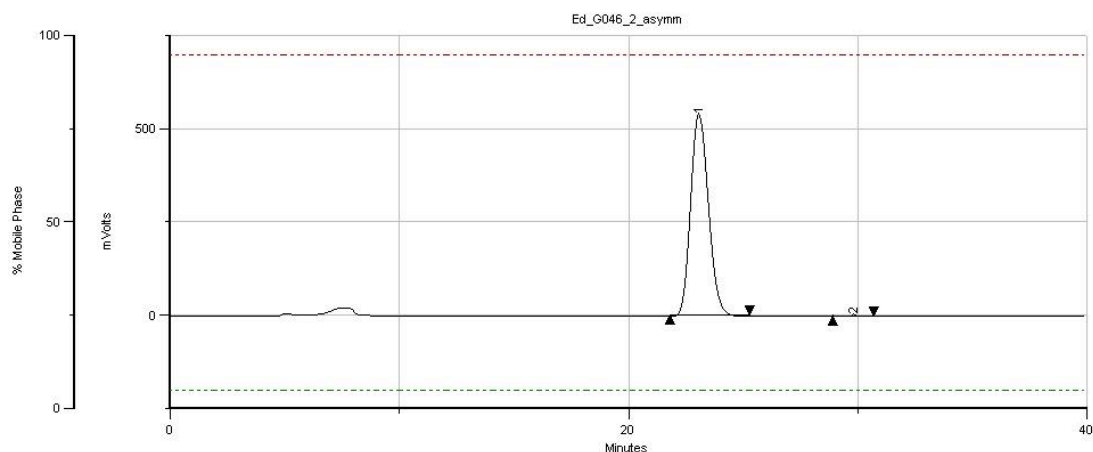

| Peak | tR (min) | Area (%) |
|------|----------|----------|
| 1    | 23.07    | 98.78    |
| 2    | 29.81    | 1.22     |

**(±)-6'-Methoxy-5-(trifluoromethyl)-3',4'-dihydro-2'H-spiro[indoline-3,1'-naphthalen]-2-one (±)31**

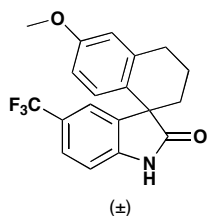

The oxindole was obtained from nitron **11** (0.113 g, 0.353 mmol) and ketene solution **59** (0.080 g, 0.425 mmol) following **general procedure E** to yield **(±)31** (0.101 g, 82%) as a white solid; mp 70-71 °C;  $\nu_{\max}$   $\text{cm}^{-1}$  (thin-film) 3157, 2934, 2841, 1694, 1622, 1497;  $^1\text{H}$  NMR (300 MHz,  $\text{CDCl}_3$ )  $\delta$  8.29 (1H, br s, *NH*), 7.52 (1H, dd,  $J = 8.2, 0.9$ , *ArH*), 7.04 (1H, d,  $J = 8.2$ , *ArH*), 6.75 (1H, d,  $J = 2.7$ , *ArH*), 6.62 (1H, dd,  $J = 8.6, 2.7$ , *ArH*), 6.50 (1H, d,  $J = 8.6$ , *ArH*), 3.79 (3H, s, *OMe*), 3.01 (2H, app. br t,  $J = 6.3$ ,  $\text{CH}_2$ ), 2.45-2.36 (1H, m, 1 x  $\text{CH}_2$ ), 2.28-2.20 (1H, m, 1 x  $\text{CH}_2$ ), 2.07-1.96 (2H, m,  $\text{CH}_2$ );  $^{13}\text{C}$  NMR (100 MHz,  $\text{CDCl}_3$ )  $\delta$  183.6, 158.8, 143.5, 139.4, 138.3, 129.1, 125.9, 125.6 (app. t,  $J = 5.0$ ), 125.1 (d,  $J = 40.3$ ), 121.2 (d,  $J = 3.9$ ), 114.1, 113.4, 109.9, 55.2, 52.2, 34.3, 29.6, 18.6;  $m/z$  ( $\text{ESI}^+$ ) 348 ( $[\text{M}+\text{H}]^+$ , 100%); HRMS ( $\text{EI}^+$ )  $\text{C}_{19}\text{H}_{16}\text{F}_3\text{NO}_2^+$  ( $[\text{M}+\text{H}]^+$ ) found 348.1205 requires 348.1206 (+ 0.1 ppm).

**(S)-6'-Methoxy-5-(trifluoromethyl)-3',4'-dihydro-2'H-spiro[indoline-3,1'-naphthalen]-2-one 31**

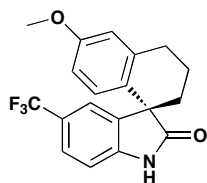

The oxindole was obtained from chiral nitron **25** (0.119 g, 0.214 mmol) and ketene solution **59** (1.6 mL) following **general procedure F** to yield **31** (0.036 g, 48%) as a white solid;  $[\alpha]_D^{20} -52.0^\circ$  ( $c = 0.40$ ,  $\text{CHCl}_3$ ); HPLC analysis: 98% e.e. (Daicel Chiralcel OD-H column, eluent: hexane/*i*-PrOH 95:5, flow 1.0 mL/min, wavelength: 254 nm, retention times: 39.8 min (major) and 49.0 min (minor)).



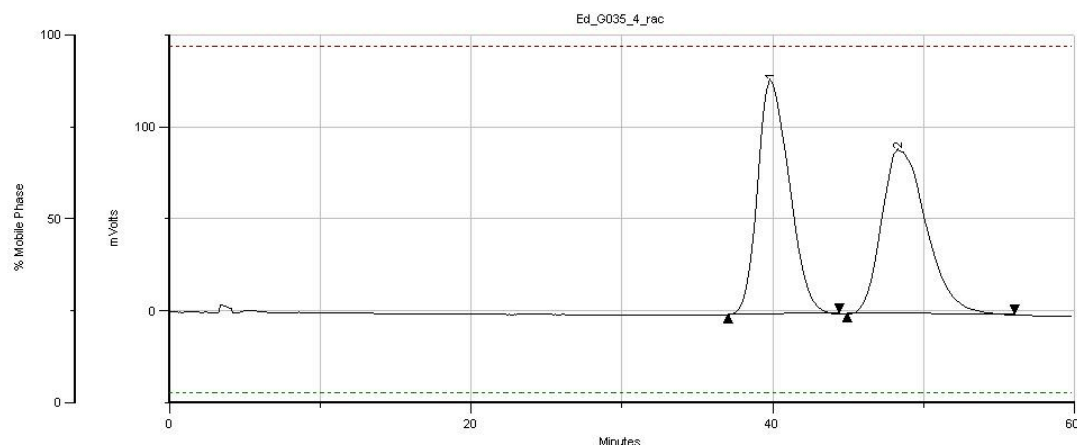

| Peak | tR (min) | Area (%) |
|------|----------|----------|
| 1    | 39.85    | 50.08    |
| 2    | 49.30    | 49.92    |

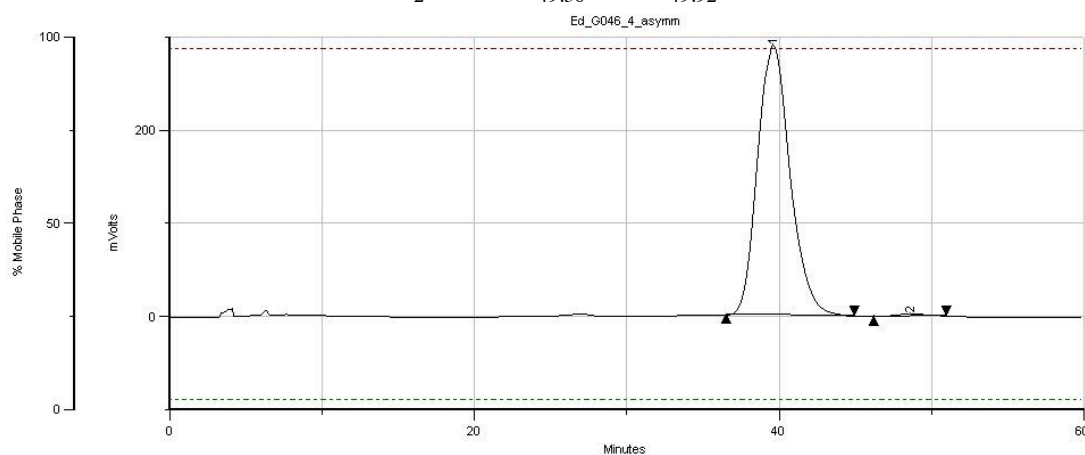

| Peak | tR (min) | Area (%) |
|------|----------|----------|
| 1    | 39.61    | 98.66    |
| 2    | 48.65    | 1.34     |

**(±)-5,6'-Dimethoxy-3',4'-dihydro-2'H-spiro[indoline-3,1'-naphthalen]-2-one (±)32**

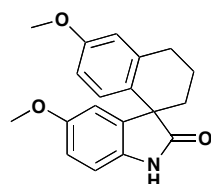

(±)

The oxindole was obtained from nitron **4** (0.074 g, 0.326 mmol) and ketene solution **59** (0.080 g, 0.425 mmol) following **general procedure E** to yield **(±)32** (0.078 g, 77%) as a white solid; mp 109-110 °C;  $\nu_{\max}$   $\text{cm}^{-1}$  (thin-film) 3190, 2934, 1683, 1605, 1495;  $^1\text{H}$  NMR (300 MHz,  $\text{CDCl}_3$ )  $\delta$  7.61 (1H, br s, NH), 6.84 (1H, d,  $J = 8.5$ , ArH), 6.74 (1H, dd,  $J = 8.5$ , 2.5, ArH), 6.69 (1H, d,  $J = 2.5$ , ArH), 6.63 (1H, d,  $J = 2.5$ , ArH), 6.59 (1H, dd,  $J = 8.5$ , 2.5, ArH), 6.53 (1H, d,  $J = 8.5$ , ArH), 3.75 (3H, s, OMe), 3.72 (3H, s, OMe), 3.05-2.87 (2H, m,  $\text{CH}_2$ ), 2.43-2.30 (1H, m, 1 x  $\text{CH}_2$ ), 2.26-2.16 (2H, m,  $\text{CH}_2$ ), 2.03-1.92 (1H, m, 1 x  $\text{CH}_2$ );  $^{13}\text{C}$  NMR (100 MHz,  $\text{CDCl}_3$ )  $\delta$  182.5, 158.4, 156.0, 139.2, 133.4, 129.3, 127.0, 113.8, 113.1, 112.4, 111.4, 109.8, 55.8, 55.2, 52.4, 34.4, 29.6, 18.7, 14.2;  $m/z$

(ESI<sup>+</sup>) 310 ([M+H]<sup>+</sup>, 100%); HRMS (EI<sup>+</sup>) C<sub>19</sub>H<sub>19</sub>NO<sub>3</sub><sup>+</sup> ([M+H]<sup>+</sup>) found 310.1441 requires 310.1438 (+ 0.3 ppm).

**(S)-5,6'-Dimethoxy-3',4'-dihydro-2'H-spiro[indoline-3,1'-naphthalen]-2-one **32****

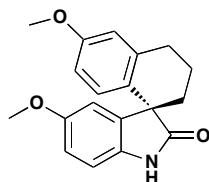

The oxindole was obtained from chiral nitron **26** (0.111 g, 0.214 mmol) and ketene solution **59** (1.6 mL) following **general procedure F** to yield **32** (0.034 g, 52%) as a white solid;  $[\alpha]_D^{20}$  -75.2° (*c* = 0.25, CHCl<sub>3</sub>); HPLC analysis: 99% e.e. (Daicel Chiralcel AD-H column, eluent: hexane/*i*-PrOH 95:5, flow 1.0 mL/min, wavelength: 254 nm, retention times: 35.6 min (major) and 50.3 min (minor)).

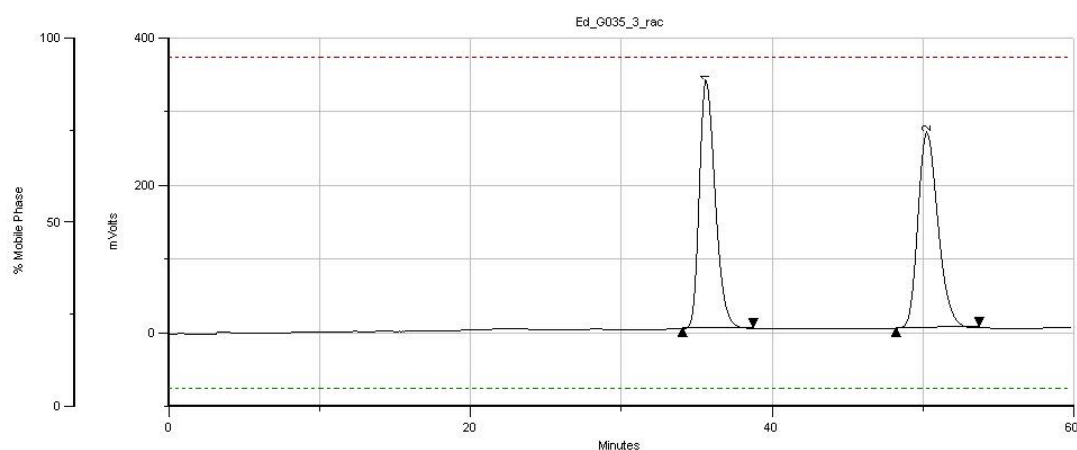

| Peak | tR (min) | Area (%) |
|------|----------|----------|
| 1    | 35.62    | 49.95    |
| 2    | 50.26    | 50.05    |

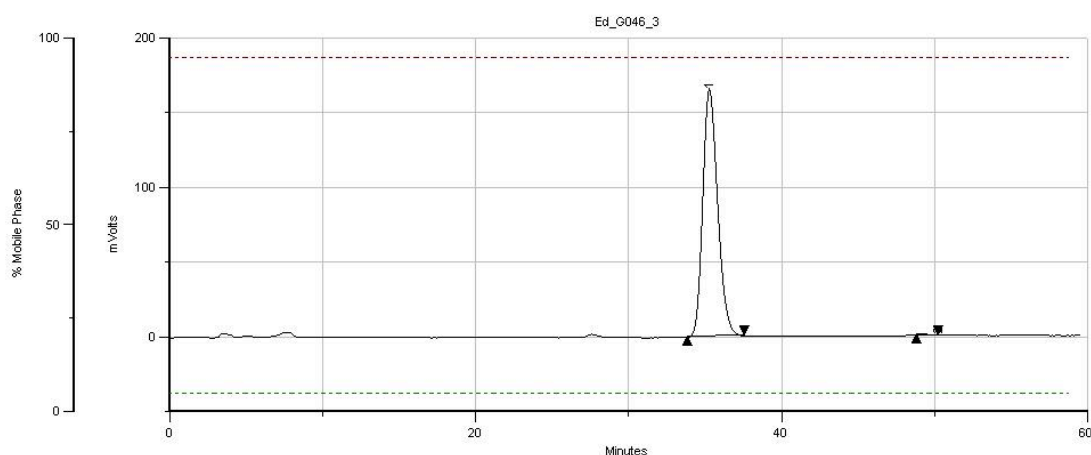

| Peak | tR (min) | Area (%) |
|------|----------|----------|
| 1    | 35.27    | 99.72    |
| 2    | 49.30    | 0.28     |

**(±)-7'-methoxy-3',4'-dihydro-2'H-spiro[indoline-3,1'-naphthalen]-2-one (±)33**

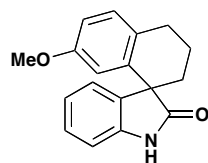

(±)

The oxindole was obtained from nitrone **3** (0.028 g, 0.142 mmol) and ketene solution **65** (2.0 mL) following **general procedure E** to yield **(±)33** (0.033 g, 83%) as a white solid; mp 101-103 °C;  $\nu_{\max}$   $\text{cm}^{-1}$  (thin-film) 3179, 2934, 2836, 1687, 1620, 1497;  $^1\text{H}$  NMR (300 MHz,  $\text{CDCl}_3$ )  $\delta$  7.74 (1H, br s, *NH*), 7.21 (1H, td,  $J = 7.6, 1.5$ , *ArH*), 7.10 (1H, d,  $J = 8.5$ , *ArH*), 7.06-7.03 (1H, m, *ArH*), 6.99 (1H, dd,  $J = 7.4, 1.0$ , *ArH*), 6.93 (1H, d,  $J = 7.7$ , *ArH*), 6.73 (1H, dd,  $J = 8.5, 2.7$ , *ArH*), 6.12 (1H, d,  $J = 2.7$ , *ArH*), 3.61 (3H, s, *OMe*), 2.99-2.84 (2H, m,  $\text{CH}_2$ ), 2.35-2.17 (2H, m,  $\text{CH}_2$ ), 2.05-1.95 (2H, m,  $\text{CH}_2$ );  $^{13}\text{C}$  NMR (125 MHz,  $\text{CDCl}_3$ )  $\delta$  182.6, 157.8, 140.1, 137.7, 135.7, 130.5, 130.1, 127.9, 124.3, 122.8, 113.3, 113.1, 109.8, 55.2, 52.8, 34.1, 28.5, 18.9;  $m/z$  ( $\text{ESI}^+$ ) 280 ( $[\text{M}+\text{H}]^+$ , 100%); HRMS ( $\text{EI}^+$ )  $\text{C}_{18}\text{H}_{17}\text{NO}_2^+$  ( $[\text{M}+\text{H}]^+$ ) found 280.1336 requires 280.1332 (+ 0.4 ppm).

**(S)-7'-methoxy-3',4'-dihydro-2'H-spiro[indoline-3,1'-naphthalen]-2-one 33**

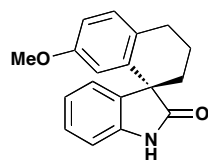

The oxindole was obtained from chiral nitrone **19** (0.075 g, 0.154 mmol) and ketene solution **65** (2.0 mL) following **general procedure F** to yield **33** (0.034 g, 79%) as a white solid;  $[\alpha]_D^{20}$  -9.4° ( $c = 0.70$ ,  $\text{CHCl}_3$ ); HPLC analysis: 98% e.e. (Daicel Chiralcel AD-H column, eluent: hexane/*i*-PrOH 95:5, flow 1.0 mL/min, wavelength: 254 nm, retention times: 25.3 min (major) and 28.7 min (minor)).

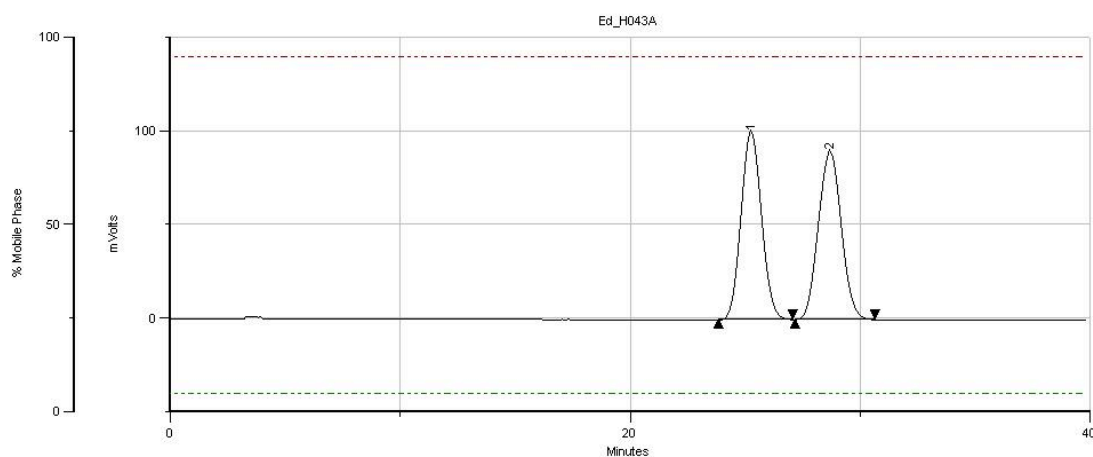

| Peak | tR (min) | Area (%) |
|------|----------|----------|
| 1    | 25.26    | 49.86    |
| 2    | 28.70    | 50.14    |

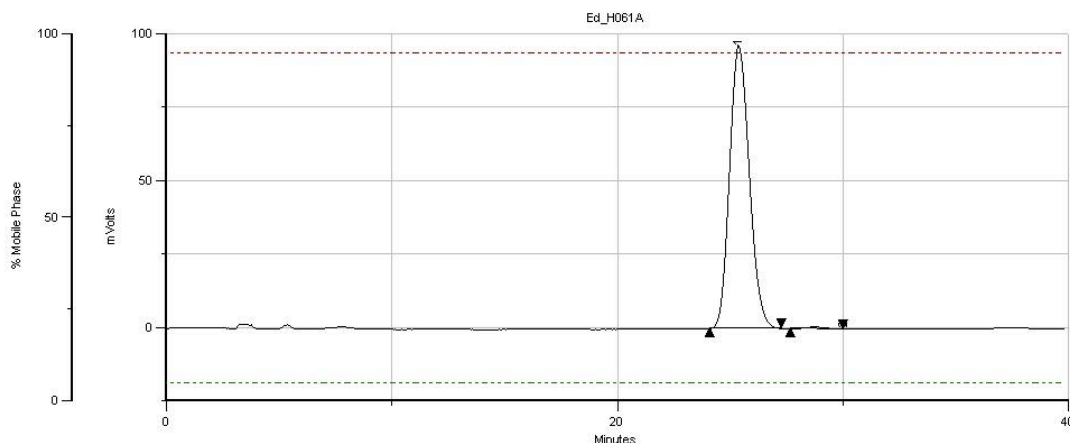

| Peak | tR (min) | Area (%) |
|------|----------|----------|
| 1    | 25.38    | 98.98    |
| 2    | 28.83    | 1.02     |

**(±)-7'-methoxy-5-methyl-3',4'-dihydro-2'H-spiro[indoline-3,1'-naphthalen]-2-one (±)34**

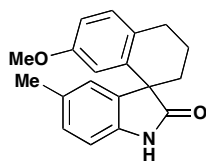

(±) The oxindole was obtained from nitrone **9** (0.031 g, 0.106 mmol) and ketene solution **65** (2.0 mL) following **general procedure E** to yield (±)**34** (0.036 g, 84%) as a white solid; mp 180-181 °C;  $\nu_{\max}$  cm<sup>-1</sup> (thin-film) 3146, 3024, 2833, 1689, 1610, 1499; <sup>1</sup>H NMR (500 MHz, CDCl<sub>3</sub>)  $\delta$  7.86 (1H, br s, NH), 7.10 (1H, d, *J* = 8.5, ArH), 7.00 (1H, dd, *J* = 7.9, 0.6, ArH), 6.86 (1H, s, ArH), 6.82 (1H, d, *J* = 7.9, ArH), 6.73 (1H, dd, *J* = 8.5, 2.6, ArH), 6.13 (1H, d, *J* = 2.6, ArH), 3.62 (3H, s, OMe), 2.96-2.87 (2H, m, CH<sub>2</sub>), 2.36-2.28 (1H, m, 1 x CH<sub>2</sub>), 2.25 (3H, s, Me), 2.23-2.18 (1H, m, 1 x CH<sub>2</sub>), 2.03-1.95 (2H, m, CH<sub>2</sub>); <sup>13</sup>C NMR (125 MHz, CDCl<sub>3</sub>)  $\delta$  182.3, 157.8, 137.7, 137.4, 135.9, 132.3, 130.5, 130.1, 128.2, 125.1, 113.3, 113.1, 109.3, 55.2, 52.8, 34.1, 28.4, 18.9; *m/z* (ESI<sup>+</sup>) 294 ([M+H]<sup>+</sup>, 100%); HRMS (EI<sup>+</sup>) C<sub>19</sub>H<sub>19</sub>NO<sub>2</sub><sup>+</sup> ([M+H]<sup>+</sup>) found 294.1492 requires 294.1492 (+ 0.0 ppm).

**(S)-7'-methoxy-5-methyl-3',4'-dihydro-2'H-spiro[indoline-3,1'-naphthalen]-2-one 34**

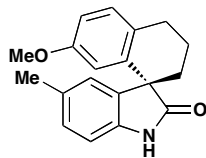

The oxindole was obtained from chiral nitrone **27** (0.075 g, 0.150 mmol) and ketene solution **65** (2.0 mL) following **general procedure F** to yield **34** (0.039 g, 89%) as a white semi-solid;  $[\alpha]_D^{20}$  +39.5° (*c* = 0.45, CHCl<sub>3</sub>); HPLC analysis: 94% e.e. (Daicel Chiralcel AD-H column, eluent: hexane/*i*-PrOH 95:5, flow 1.0 mL/min, wavelength: 254 nm, retention times: 20.7 min (major) and 26.2 min (minor)).

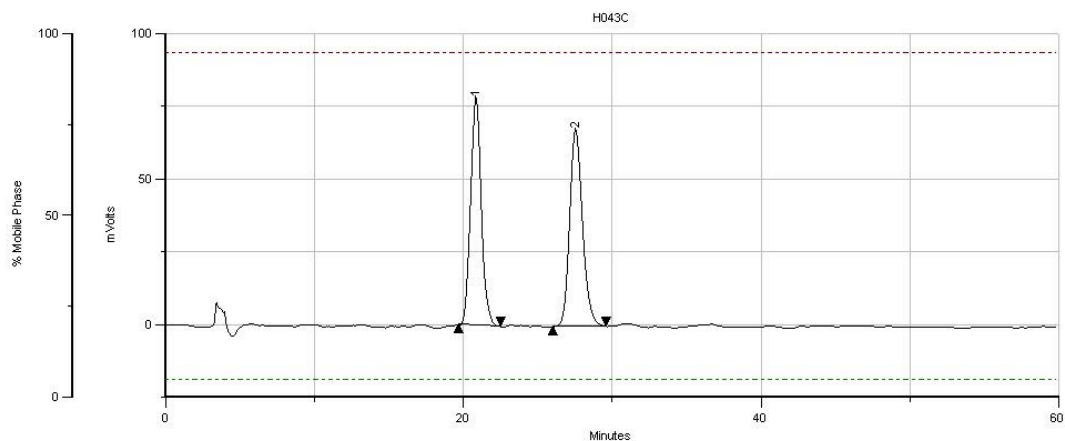

| Peak | tR (min) | Area (%) |
|------|----------|----------|
| 1    | 20.85    | 49.14    |
| 2    | 26.42    | 50.86    |

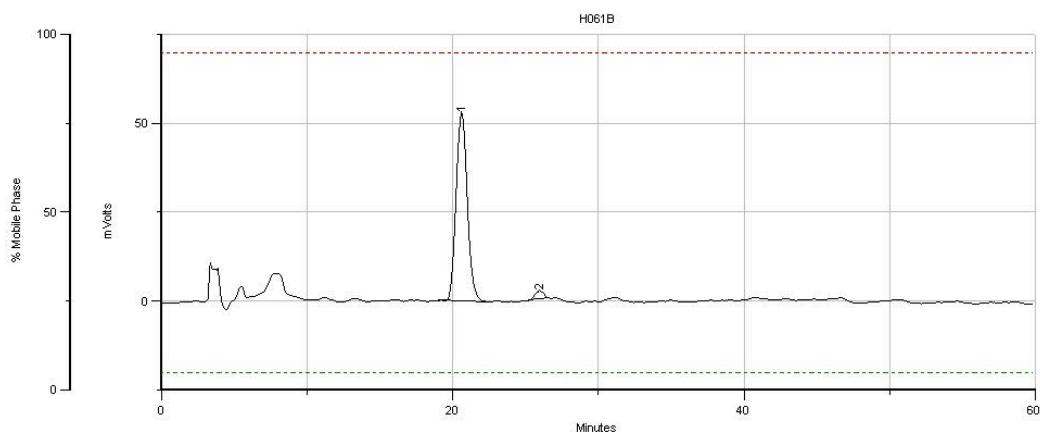

| Peak | tR (min) | Area (%) |
|------|----------|----------|
| 1    | 20.61    | 96.58    |
| 2    | 25.97    | 3.42     |

**(±)-7'-methoxy-7-methyl-3',4'-dihydro-2'H-spiro[indoline-3,1'-naphthalen]-2-one (±)35**

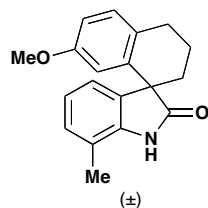

The oxindole was obtained from nitron **28** (0.031 g, 0.106 mmol) and ketene solution **65** (2.0 mL) following **general procedure E** to yield **(±)35** (0.038 g, 88%) as a white solid; mp 216-218 °C;  $\nu_{\max}$  cm<sup>-1</sup> (thin-film) 3173, 3148, 2936, 2837, 1690, 1624, 1601, 1497; <sup>1</sup>H NMR (500 MHz, CDCl<sub>3</sub>)  $\delta$  8.82 (1H, br s, NH), 7.10 (1H, d,  $J$  = 8.5, ArH), 7.02 (1H, d,  $J$  = 6.6, ArH), 6.91-6.86 (2H, m, ArH), 6.73 (1H, dd,  $J$  = 8.5, 2.6, ArH), 6.13 (1H, d,  $J$  = 2.6, ArH), 3.59 (3H, s, OMe), 2.98-2.87 (2H, m, CH<sub>2</sub>), 2.37-2.33 (1H, m, 1 x CH<sub>2</sub>), 2.29 (3H, s, Me), 2.24-2.19 (1H, m, 1 x CH<sub>2</sub>), 2.00-1.98 (2H, m, CH<sub>2</sub>); <sup>13</sup>C NMR (125 MHz, CDCl<sub>3</sub>)  $\delta$  183.0, 157.8, 138.9, 137.3, 135.9, 130.5, 130.0,

129.2, 122.7, 121.7, 119.1, 113.2, 113.1, 55.2, 53.2, 34.1, 28.5, 18.8, 16.6;  $m/z$  (ESI<sup>+</sup>) 294 ([M+H]<sup>+</sup>, 100%); HRMS (EI<sup>+</sup>) C<sub>19</sub>H<sub>19</sub>NO<sub>2</sub><sup>+</sup> ([M+H]<sup>+</sup>) found 294.1492 requires 294.1489 (+ 0.3 ppm).

**(S)-7'-methoxy-7-methyl-3',4'-dihydro-2'H-spiro[indoline-3,1'-naphthalen]-2-one **35****

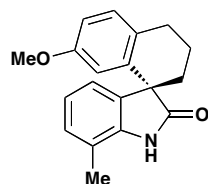

The oxindole was obtained from chiral nitrone **28** (0.057 g, 0.113 mmol) and ketene solution **65** (2.0 mL) following **general procedure F** to yield **35** (0.018 g, 55%) as a white solid;  $[\alpha]_D^{20}$  -3.0° ( $c = 0.40$ , CHCl<sub>3</sub>); HPLC analysis: 90% e.e. (Daicel Chiralcel AD-H column, eluent: hexane/*i*-PrOH 95:5, flow 1.0 mL/min, wavelength: 254 nm, retention times: 19.2 min (minor) and 25.1 min (major)).

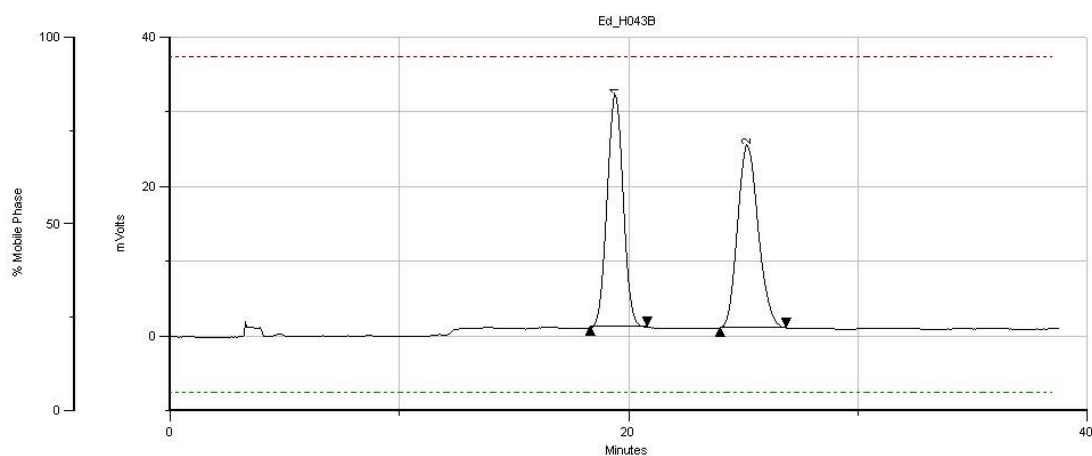

| Peak | tR (min) | Area (%) |
|------|----------|----------|
| 1    | 19.42    | 49.64    |
| 2    | 25.18    | 50.36    |

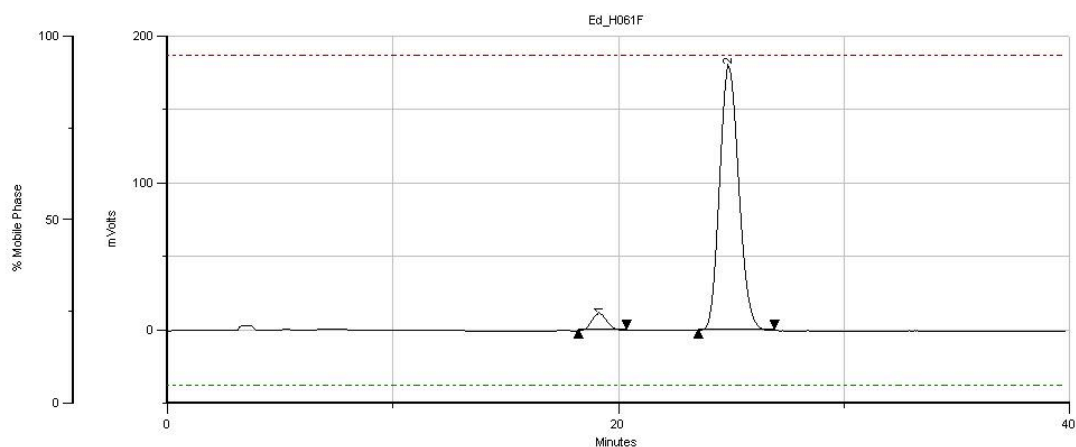

| Peak | tR (min) | Area (%) |
|------|----------|----------|
| 1    | 19.14    | 4.97     |
| 2    | 24.89    | 95.03    |

**(±)-7'-methoxy-5-(trifluoromethyl)-3',4'-dihydro-2'H-spiro[indoline-3,1'-naphthalen]-2-one (±)36**

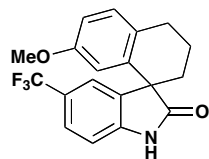

(±) The oxindole was obtained from nitrone **11** (0.040 g, 0.151 mmol) and ketene solution **65** (2.0 mL) following **general procedure E** to yield **(±)36** (0.034 g, 65%) as a colourless oil;  $\nu_{\max}$   $\text{cm}^{-1}$  (thin-film) 2849, 1701, 1466;  $^1\text{H}$  NMR (300 MHz,  $\text{CDCl}_3$ )  $\delta$  8.22 (1H, br s, *NH*), 7.51 (1H, dt,  $J = 8.2, 0.8$ , *ArH*), 7.28 (1H, t,  $J = 8.5$ , *ArH*), 7.14 (1H, d,  $J = 8.5$ , *ArH*), 7.02 (1H, d,  $J = 8.2$ , *ArH*), 6.77 (1H, dd,  $J = 8.5, 2.7$ , *ArH*), 6.07 (1H, d,  $J = 2.7$ , *ArH*), 3.62 (3H, s, *OMe*), 2.94 (1H, t,  $J = 6.4$ , 1 x  $\text{CH}_2$ ), 2.39-2.32 (1H, m, 1 x  $\text{CH}_2$ ), 2.27-2.18 (1H, m, 1 x  $\text{CH}_2$ ), 2.04-1.95 (2H, m,  $\text{CH}_2$ );  $^{13}\text{C}$  NMR (100 MHz,  $\text{CDCl}_3$ ); 182.6, 158.0, 143.2, 138.1, 134.6, 130.8, 130.1, 125.7 (d,  $J = 2.3$ ), 125.4 app. d,  $J = 25.7$ ), 121.4 (d,  $J = 4.0$ ), 113.4, 113.2, 109.8, 55.2, 52.8, 34.1, 28.3, 18.8;  $m/z$  ( $\text{ESI}^+$ ) 348 ( $[\text{M}+\text{H}]^+$ , 100%); HRMS ( $\text{EI}^+$ )  $\text{C}_{19}\text{H}_{17}\text{NO}_2\text{F}_3^+$  ( $[\text{M}+\text{H}]^+$ ) found 348.1209 requires 348.1206 (+ 0.9 ppm).

**(S)-7'-methoxy-5-(trifluoromethyl)-3',4'-dihydro-2'H-spiro[indoline-3,1'-naphthalen]-2-one 36**

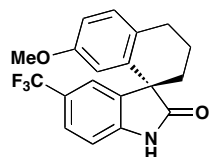

The oxindole was obtained from chiral nitrone **25** (0.075 g, 0.135 mmol) and ketene solution **65** (2.0 mL) following **general procedure F** to yield **36** (0.032 g, 64%) as a colourless oil;  $[\alpha]_D^{20}$   $-3.1^\circ$  ( $c = 0.60$ ,  $\text{CHCl}_3$ ); HPLC analysis: 97% e.e. (Daicel Chiralcel AD-H column, eluent: hexane/*i*-PrOH 95:5, flow 1.0 mL/min, wavelength: 254 nm, retention times: 13.0 min (major) and 15.8 min (minor)).

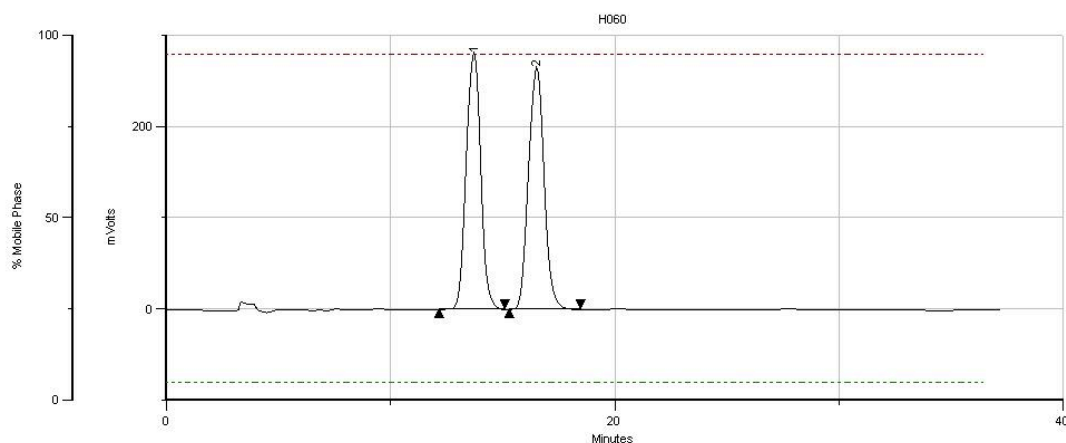

| Peak | tR (min) | Area (%) |
|------|----------|----------|
| 1    | 13.51    | 49.59    |
| 2    | 16.20    | 50.41    |

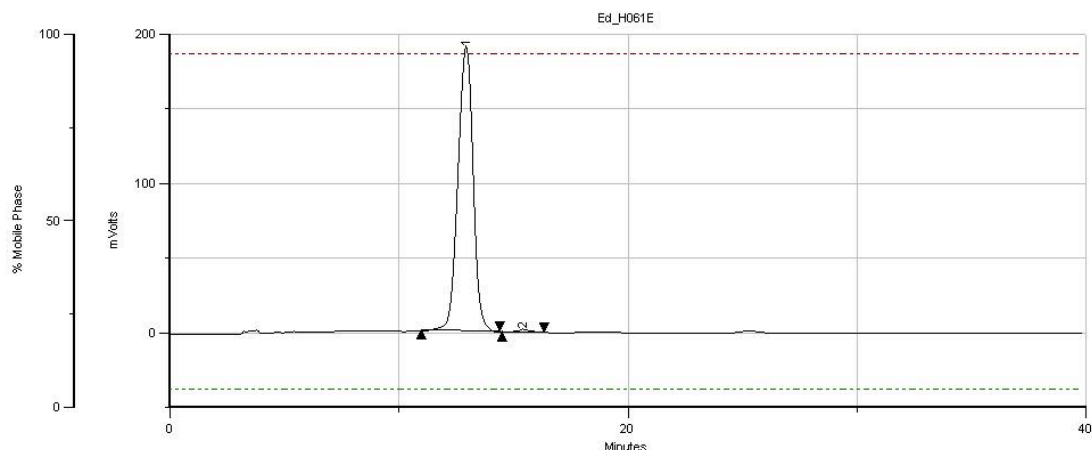

| Peak | tR (min) | Area (%) |
|------|----------|----------|
| 1    | 12.94    | 98.67    |
| 2    | 15.45    | 1.33     |

**(±)-5-Fluoro-7'-methoxy-3',4'-dihydro-2'H-spiro[indoline-3,1'-naphthalen]-2-one (±)37**

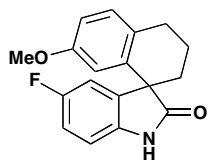

(±)

The oxindole was obtained from nitrone **5** (0.028 g, 0.094 mmol) and ketene solution **65** (2.0 mL) following **general procedure E** to yield **(±)37** (0.025 g, 65%) as a white solid; mp 104-106 °C;  $\nu_{\max}$   $\text{cm}^{-1}$  (thin-film) 3146, 3024, 2849, 1691, 1611, 1500, 1487;  $^1\text{H}$  NMR (500 MHz,  $\text{CDCl}_3$ )  $\delta$  8.37 (1H, br s, NH), 7.11 (1H, d,  $J = 8.5$ , ArH), 6.91 (1H, td,  $J = 8.7$ , 2.5, ArH), 6.87 (1H, dd,  $J = 8.5$ , 4.5, ArH), 6.79 (1H, dd,  $J = 8.1$ , 2.5, ArH), 6.75 (1H, dd,  $J = 8.5$ , 2.6, ArH), 6.11 (1H, d,  $J = 2.6$ , ArH), 3.63 (3H, s, OMe), 2.97-2.86 (2H, m,  $\text{CH}_2$ ), 2.37-2.30 (1H, m, 1 x  $\text{CH}_2$ ), 2.25-2.17 (2H, m, 1 x  $\text{CH}_2$ ), 2.01-1.94 (1H, m,  $\text{CH}_2$ );  $^{13}\text{C}$  NMR (125 MHz,  $\text{CDCl}_3$ )  $\delta$  182.4, 159.1 (d,  $J = 239.3$ ), 158.3, 139.2 (d,  $J = 7.9$ ), 135.9, 135.9, 135.0, 130.7, 130.0, 114.3 (d,  $J = 23.3$ ), 113.2 (d,  $J = 27.2$ ), 112.3 (d,  $J = 24.7$ ), 110.3 (d,  $J = 8.1$ ), 55.2, 53.3, 34.0, 28.3, 18.8;  $m/z$  (ESI<sup>+</sup>) 298 ([M+H]<sup>+</sup>, 100%); HRMS (EI<sup>+</sup>)  $\text{C}_{18}\text{H}_{16}\text{FNO}_2^+$  ([M+H]<sup>+</sup>) found 298.1242 requires 298.1238 (+ 0.4 ppm).

**(S)-5-fluoro-7'-methoxy-3',4'-dihydro-2'H-spiro[indoline-3,1'-naphthalen]-2-one 37**

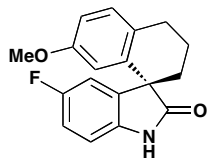

The oxindole was obtained from chiral nitrone **24** (0.059 g, 0.149 mmol) and ketene solution **65** (2.0 mL) following **general procedure F** to yield **37** (0.033 g, 74%) as a off-white solid;  $[\alpha]_D^{20}$  -4.4° ( $c = 0.65$ ,  $\text{CHCl}_3$ ); HPLC analysis: 97% e.e. (Daicel Chiralcel AD-H column, eluent: hexane/*i*-PrOH 95:5, flow 1.0 mL/min, wavelength: 254 nm, retention times: 18.9 min (major) and 28.3 min (minor)).



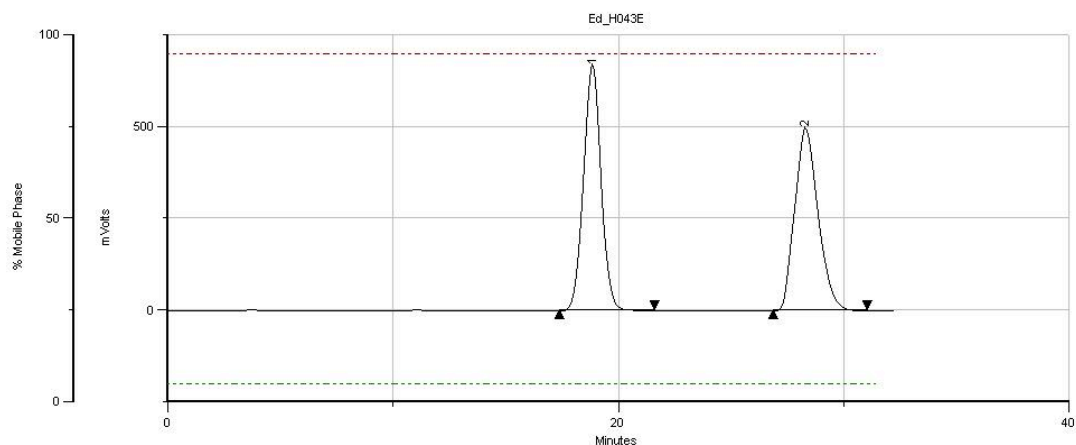

| Peak | tR (min) | Area (%) |
|------|----------|----------|
| 1    | 18.85    | 50.33    |
| 2    | 28.31    | 49.67    |

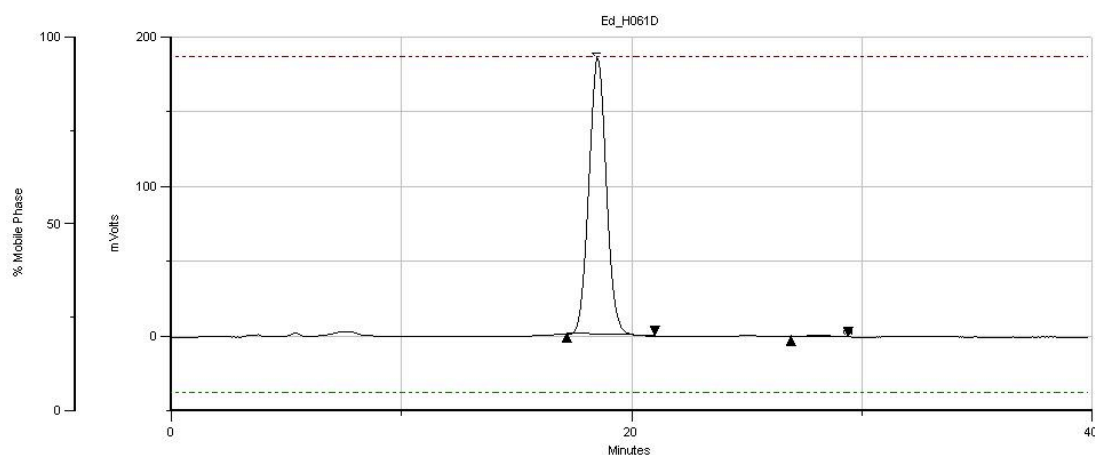

| Peak | tR (min) | Area (%) |
|------|----------|----------|
| 1    | 18.53    | 98.63    |
| 2    | 28.07    | 1.37     |

**(±)-5,7'-dimethoxy-3',4'-dihydro-2'H-spiro[indoline-3,1'-naphthalen]-2-one (±)38**

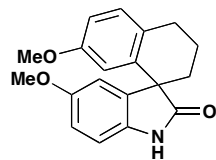

(±) The oxindole was obtained from nitron **4** (0.029 g, 0.094 mmol) and ketene solution **65** (2.0 mL) following **general procedure E** to yield **(±)38** (0.036 g, 92%) as a white solid; mp 136-137 °C;  $\nu_{\max}$  cm<sup>-1</sup> (thin-film) 3154, 3024, 2833, 1693, 1612, 1499, 1485; <sup>1</sup>H NMR (500 MHz, CDCl<sub>3</sub>)  $\delta$  8.45 (1H, br s, NH), 7.10 (1H, d, *J* = 8.5, ArH), 6.85 (1H, d, *J* = 8.5, ArH), 6.74 (1H, dd, *J* = 8.5, 2.5, ArH), 6.64 (1H, d, *J* = 2.3, ArH), 6.14 (1H, d, *J* = 2.5, ArH), 3.72 (3H, s, OMe), 3.62 (3H, s, OMe), 2.98-2.86 (2H, m, CH<sub>2</sub>), 2.38-2.30 (1H, m, 1 x CH<sub>2</sub>), 2.24-2.17 (2H, m, CH<sub>2</sub>), 2.02-1.95 (1H, m, 1 x CH<sub>2</sub>); <sup>13</sup>C NMR (125 MHz, CDCl<sub>3</sub>)  $\delta$  182.7, 157.9, 156.0, 139.0, 135.6, 133.5, 130.5, 130.0, 113.3,

113.2, 112.4, 111.4, 110.1, 55.8, 55.2, 53.3, 34.1, 28.4, 18.8;  $m/z$  (ESI<sup>+</sup>) 310 ([M+H]<sup>+</sup>, 100%); HRMS (EI<sup>+</sup>) C<sub>19</sub>H<sub>19</sub>NO<sub>3</sub><sup>+</sup> ([M+H]<sup>+</sup>) found 310.1441 requires 310.1438 (+ 0.3 ppm).

**(S)-5,7'-dimethoxy-3',4'-dihydro-2'H-spiro[indoline-3,1'-naphthalen]-2-one **38****

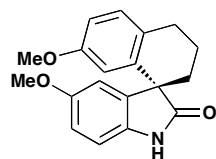

The oxindole was obtained from chiral nitron **26** (0.075 g, 0.145 mmol) and ketene solution **65** (2.0 mL) following **general procedure F** to yield **38** (0.043 g, 96%) as a very viscous orange oil;  $[\alpha]_D^{20}$  -13.3° ( $c$  = 0.95, CHCl<sub>3</sub>); HPLC analysis: 97% e.e. (Daicel Chiralcel AD-H column, eluent: hexane/*i*-PrOH 95:5, flow 1.0 mL/min, wavelength: 254 nm, retention times: 31.6 min (major) and 43.0 min (minor)).

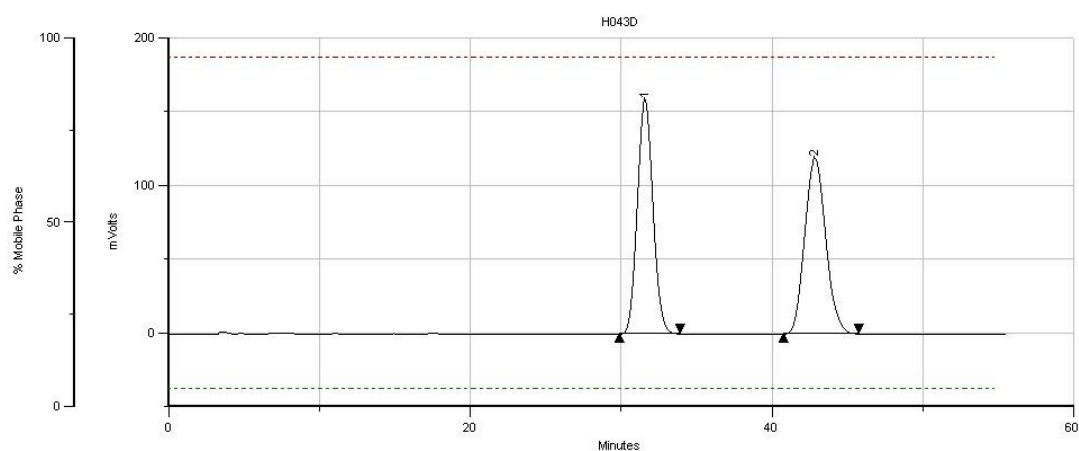

| Peak | tR (min) | Area (%) |
|------|----------|----------|
| 1    | 31.58    | 49.73    |
| 2    | 42.85    | 50.27    |

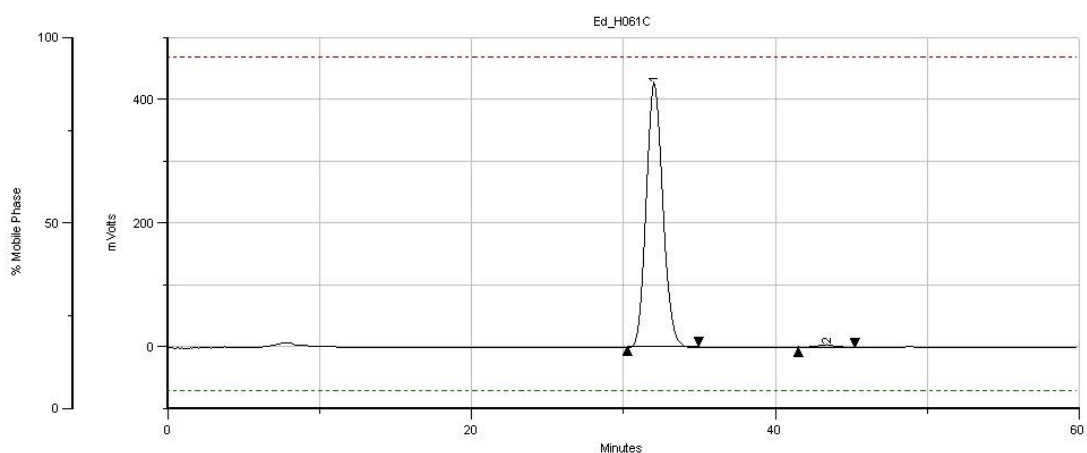

| Peak | tR (min) | Area (%) |
|------|----------|----------|
| 1    | 32.01    | 97.84    |
| 2    | 43.41    | 2.16     |

## 8. Intermediate Isolation

(S)-1-(2-((E)-(((R)-2,2-dimethyl-3-((2,4,6-triisopropylphenyl)sulfonyl)oxazolidin-4-yl)methylene)amino)phenyl)-1,2,3,4-tetrahydronaphthalene-1-carboxylic acid **21**

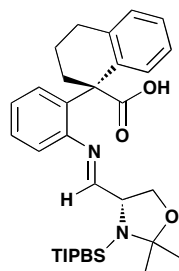

To a stirred solution of nitron **19** (0.050 g, 0.103 mmol) in THF (3 mL) was added ketene **20** (0.020g, 1.2 eq, 0.124 mmol) and the reaction stirred at rt for 1h 30 min before quenching with aq.  $\text{NH}_4\text{Cl}$  (sat.) (1 mL). The reaction mixture was extracted with  $\text{Et}_2\text{O}$  (10 mL) and washed with brine (10 mL) before being dried over  $\text{MgSO}_4$ , filtered and concentrated *in vacuo* to yield a crude yellow oil which was purified *via* column chromatography over silica (0-20% EtOAc in petroleum ether) to yield **21** (0.017 g, 26%) as a colourless oil;  $\nu_{\text{max}}$   $\text{cm}^{-1}$  (thin-film) 3441, 1697, 1653;  $^1\text{H}$  NMR (500 MHz,  $\text{CDCl}_3$ )  $\delta$  7.36 (1H, d,  $J = 8.0$ , ArH), 7.22-7.11 (4H, m, ArH &  $\text{CH}=\text{N}$ ), 7.15 (2H, s, ArH), 6.93 (2H, dt,  $J = 24.1, 7.5$ , ArH), 6.40 (1H, d,  $J = 7.6$ , ArH), 5.78 (d,  $J = 7.6$ , ArH), 4.47-4.45 (1H, m, CH), 4.34 (2H, dt,  $J = 13.4, 6.7$ , iPrH), 4.25 (1H, dd,  $J = 9.2, 2.0$ , 1 x  $\text{CH}_2$ ), 4.14 (1H, dd,  $J = 9.0, 7.3$ , 1 x  $\text{CH}_2$ ), 2.88-2.84 (2H, m, 1 x  $\text{CH}_2$  & 1 x iPrH), 2.76-2.73 (1H, m, 1 x  $\text{CH}_2$ ), 2.59-2.54 (1H, m, 1 x  $\text{CH}_2$ ), 2.46-2.43 (1H, m, 1 x  $\text{CH}_2$ ), 1.80 (6H, s,  $\text{CMe}_2$ ), 1.29-1.19 (18H, m,  $\text{CH}_2$  & iPr $\text{CH}_3$ );  $^{13}\text{C}$  NMR (125 MHz,  $\text{CDCl}_3$ )  $\delta$  177.8, 163.1, 154.1, 151.6, 147.5, 139.2, 138.8, 135.0, 132.6, 130.1, 129.9, 129.6, 127.6, 127.4, 126.1, 125.7, 124.2, 117.6, 100.4, 67.3, 61.2, 54.8, 34.2, 32.3, 29.2, 28.1, 25.1, 24.5, 23.5, 22.7, 19.5;  $m/z$  (ESI $^+$ ) 667.42 ( $[\text{M}+\text{Na}]^+$ , 100%).

## 9. References

- [1] Maresh, J.; Zhang, J.; Tzeng, Y.-L.; Goodman, N. A.; Lynn, D. G. *Bioorg. & Med. Chem. Lett.* **2007**, *17*, 3281-3286.
- [2] Andrade, M. M.; Barros, M. T.; Pinto, R.C. *Tetrahedron*, **2008**, *64*, 10521-10530.
- [3] Liu, S.; Wang, Y.; Jiang, J.; Jin, Z. *Green Chemistry*, **2009**, *11*, 1397-1400.
- [4] Duguet, N.; Slawin, A. M. Z.; Smith, A. D. *Org. Lett.* **2009**, *17*, 3858-3861.
- [5] Bamberger, R. *Justus Liebigs Ann.* **1901**, *316*, 279.
- [6] Siegfried, B. *Liebigs Ann.* **1985**, *4*, 673-682.
- [7] Peltier, G. *Bull. Soc. Chim. Fr.* **1969**, 264.
- [8] Sadownik, J. W.; Philp, D. *Angew. Chem. Int. Ed.* **2008**, *47*, 9965-9970.
- [9] Nelson, D. W.; Owens, J.; Hiraldo, D. *J. Org. Chem.* **2001**, *66*, 2572-2582.
- [10] Cheng, S. *J. Org. Chem.* **1974**, *39*, 2835-2837.
- [11] Fenster, E.; Fehle, C.; Aube, J. *Org. Lett.* **2011**, *13*, 2614-2617.

- [12] Wolff, J.; Taddei, M. *Tetrahedron*, **1986**, *42*, 4267-4272.
- [13] Moore, R. F.; Plant, S. G. P. *J. Chem. Soc.* **1951**, 3475-3478.
- [14] Wagon, J *et al.* PCT Int. Appl. (1993) WO/9315051 A1 19930805.
- [15] Hodous, B. L.; Fu, G. C. *J. Am. Chem. Soc.* **2002**, *124*, 1578-1579.
- [16] Hodous, B. L.; Ruble, C. J.; Fu, G. C. *J. Am. Chem. Soc.* **1999**, *121*, 2637-2638.
- [17] Sarges, R.; Schnur, R. C.; Belletire, J. L.; Peterson, M. J. *J. Med. Chem.* **1988**, *31*, 230-243.
- [18] Wolynskii, S. *Zh. Obshch. Khim*, **1952**, *22*, 321-324.
- [19] Pracejus, W. *Journal für praktische Chemie*, **1963**, *19*, 33-35.
- [20] Winternitz, F.; Diaz, J. *Tetrahedron*, **1963**, *19*, 1747-1752.
- [21] Hey, D. H.; Nagdy, K. A. *J. Chem. Soc.* **1953**, 1894-1898.
- [22] England, D. B.; Merey, G.; Padwa, A. *Org. Lett.* **2007**, *7*, 3805-3807.

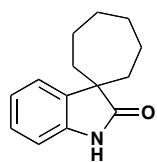

13

<sup>13</sup>C, CDCl<sub>3</sub>, 75 MHz

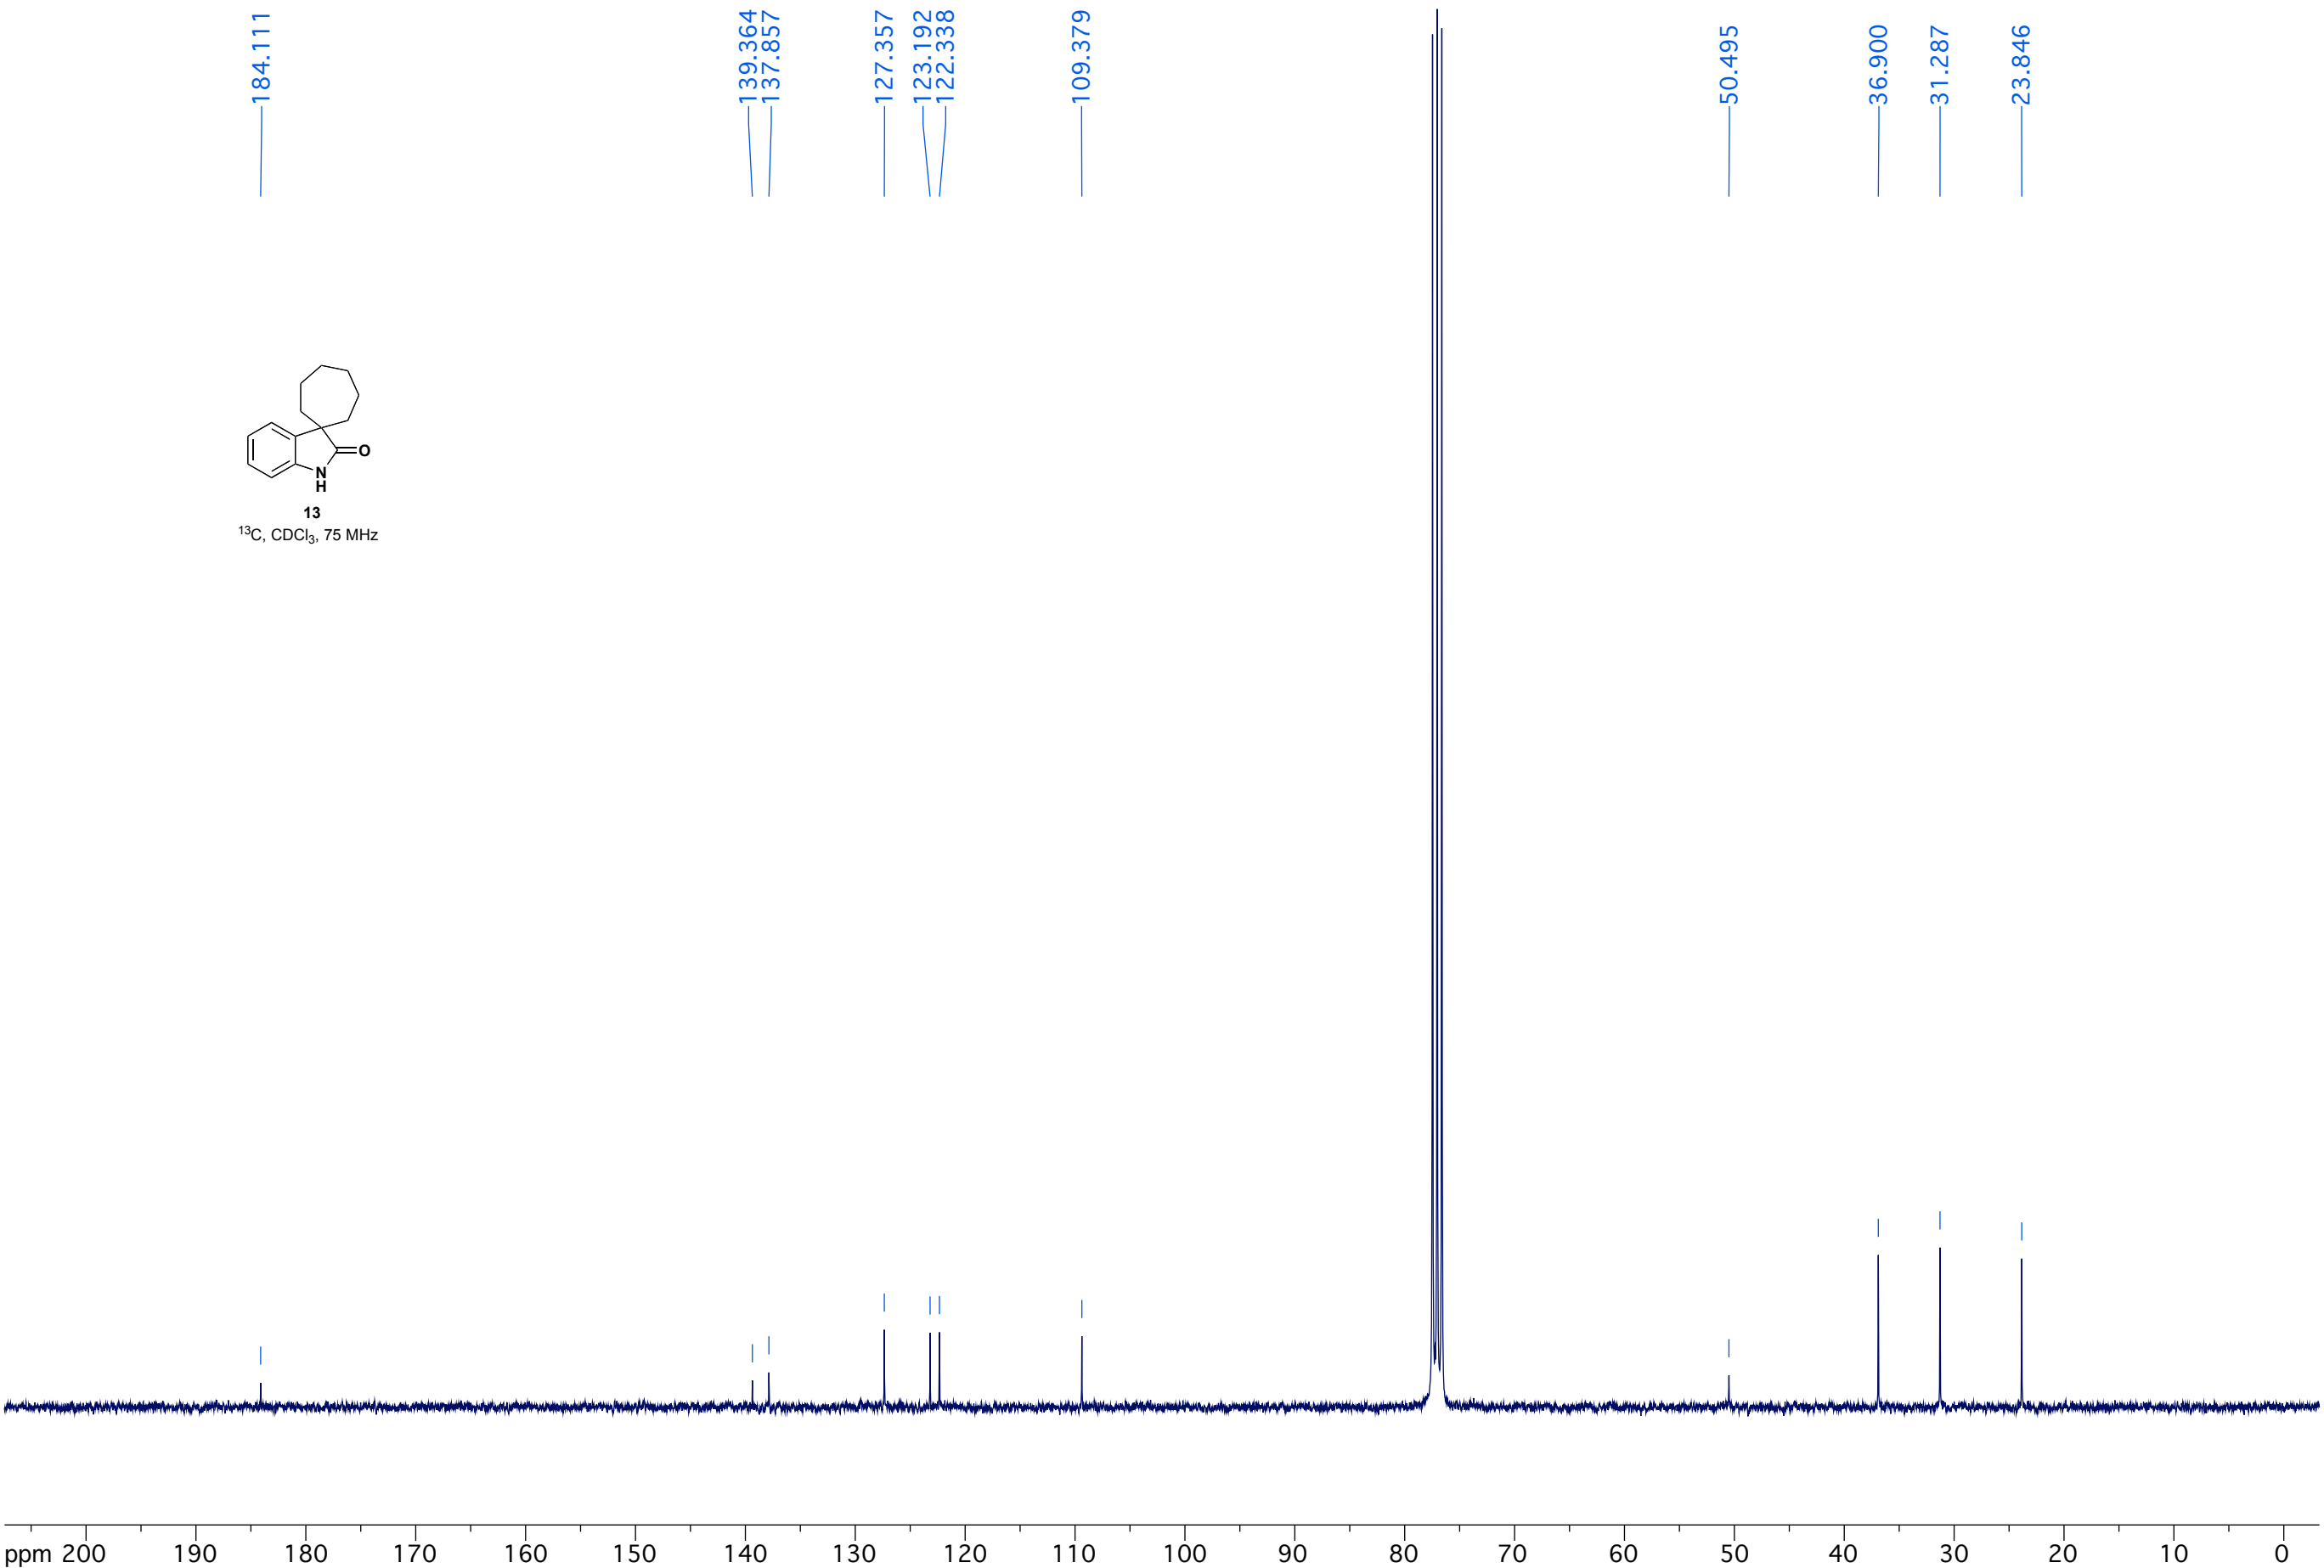

7.669  
7.347  
7.345  
7.212  
7.208  
7.187  
7.182  
7.161  
7.157  
7.047  
7.044  
7.022  
7.019  
6.997  
6.993  
6.879  
6.877  
6.853  
6.852

2.065  
2.033  
2.029  
2.014  
1.985  
1.979  
1.960  
1.950  
1.920  
1.810  
1.779  
1.762  
1.743  
1.730  
1.718  
1.696  
1.687  
1.670

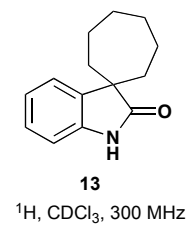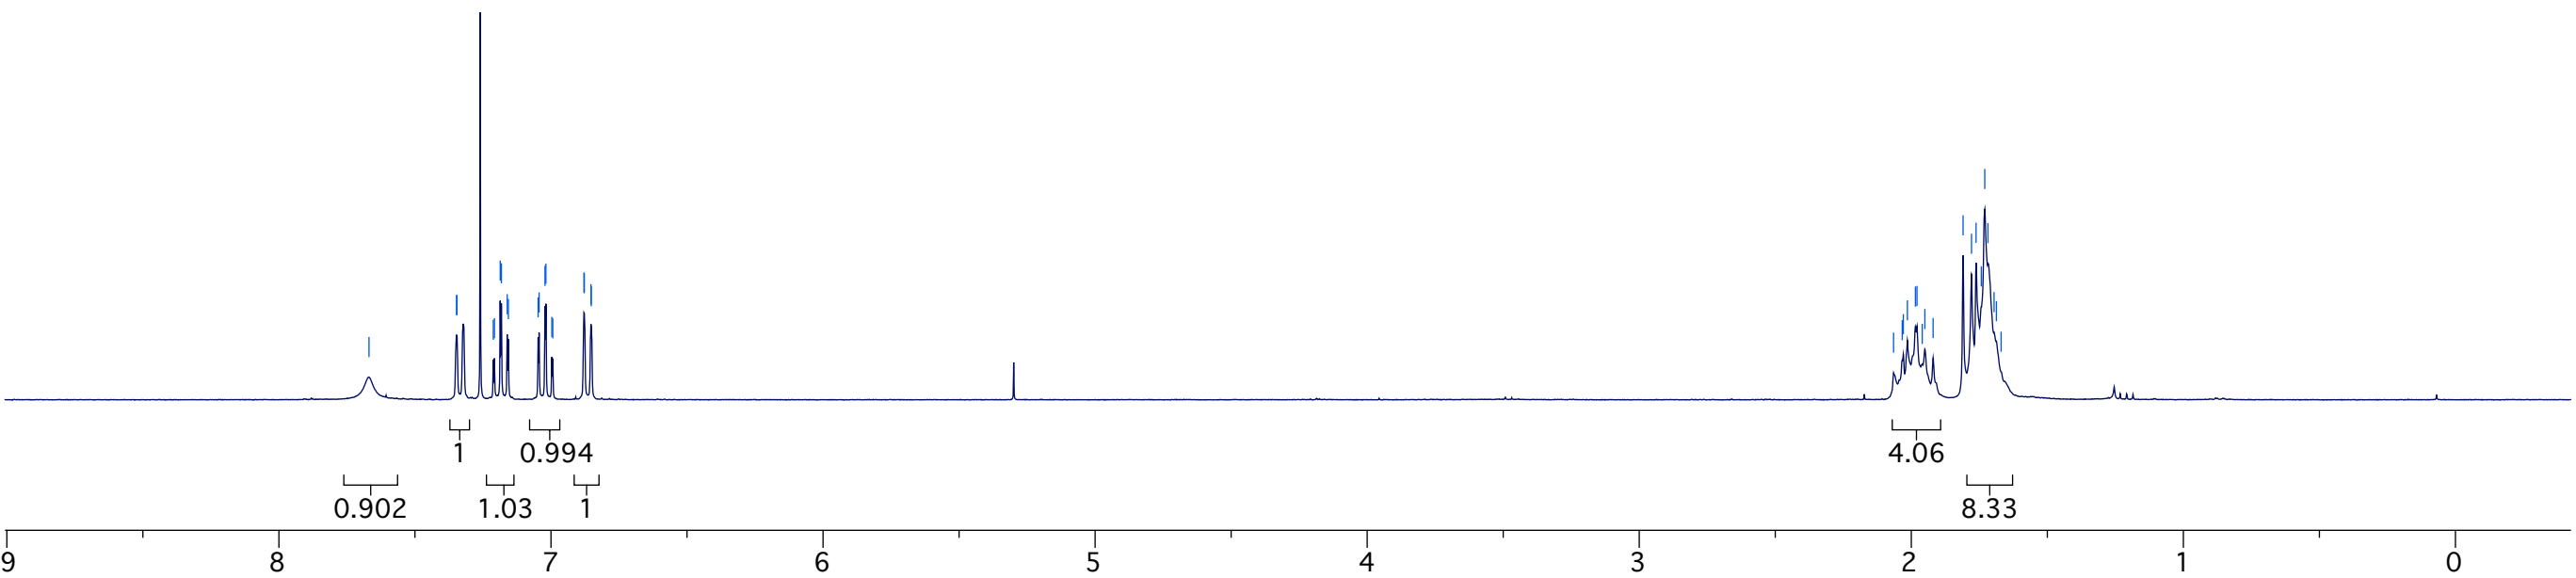

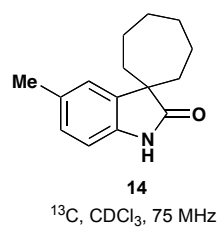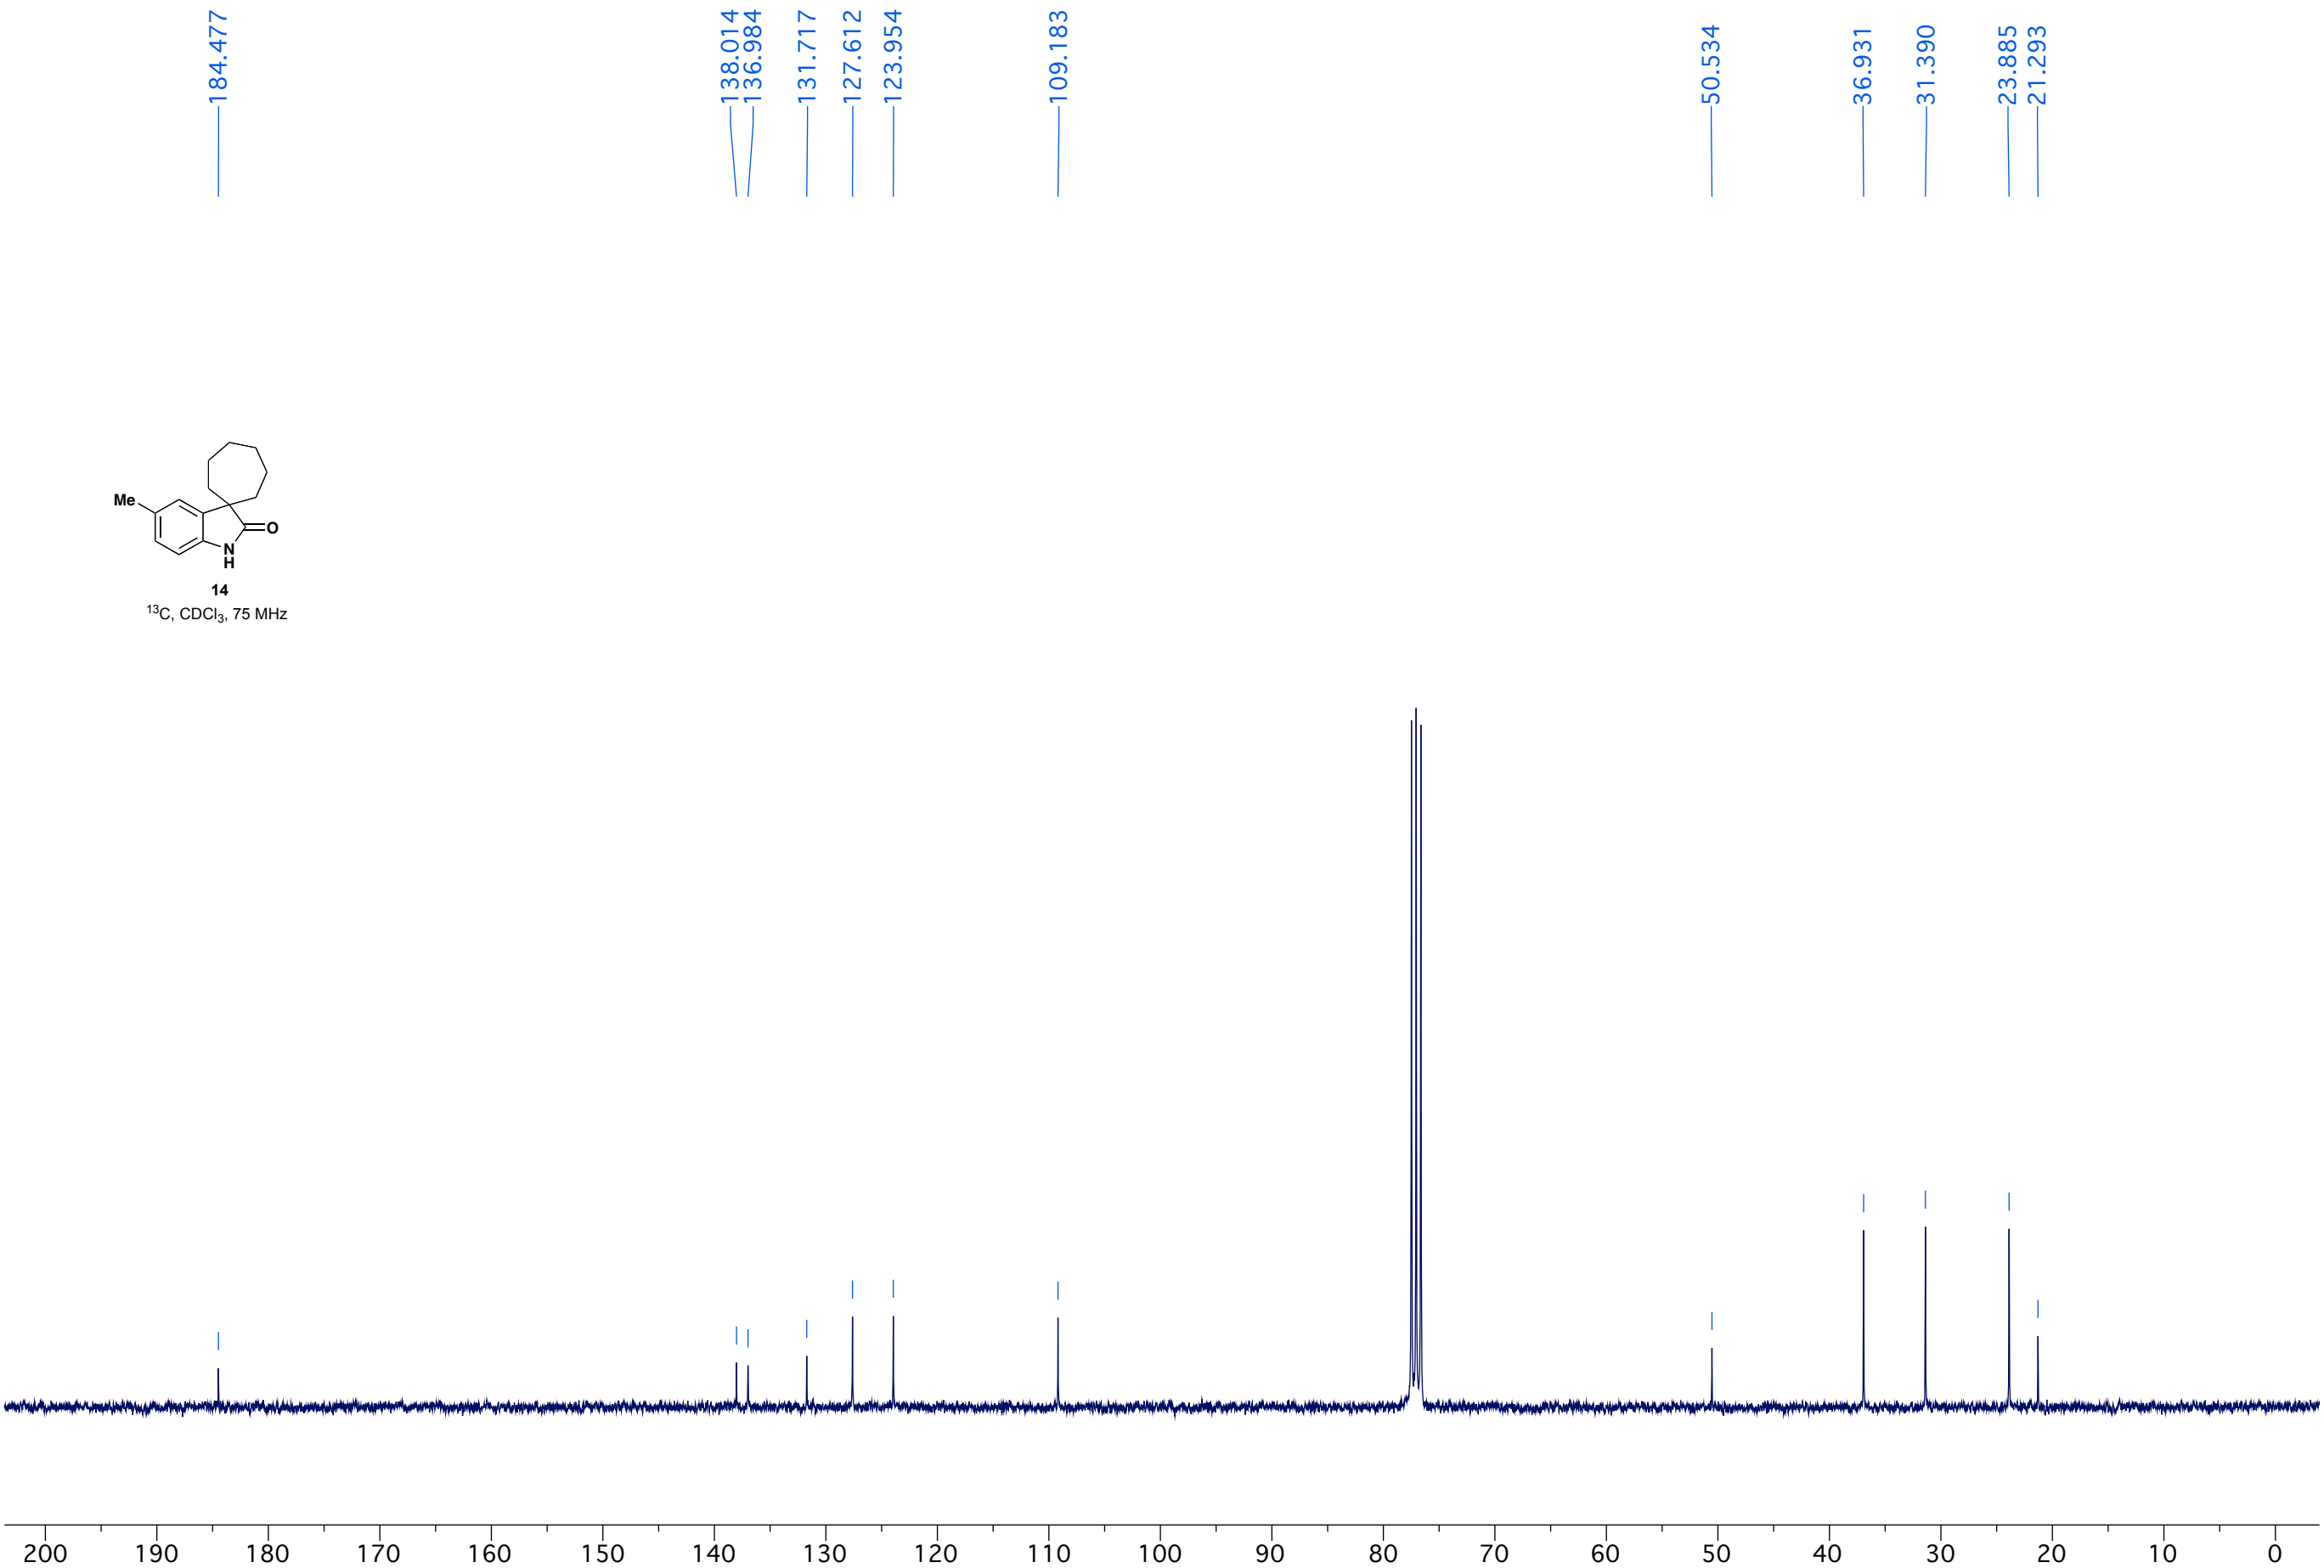

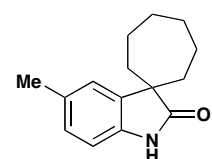

14

$^1\text{H}$ ,  $\text{CDCl}_3$ , 300 MHz

7.611  
7.610  
7.142  
7.142  
6.993  
6.991  
6.974  
6.972  
6.762  
6.743

2.337  
2.046  
2.041  
2.038  
2.014  
2.002  
1.995  
1.978  
1.970  
1.947  
1.925  
1.788  
1.765  
1.752  
1.742  
1.729  
1.723

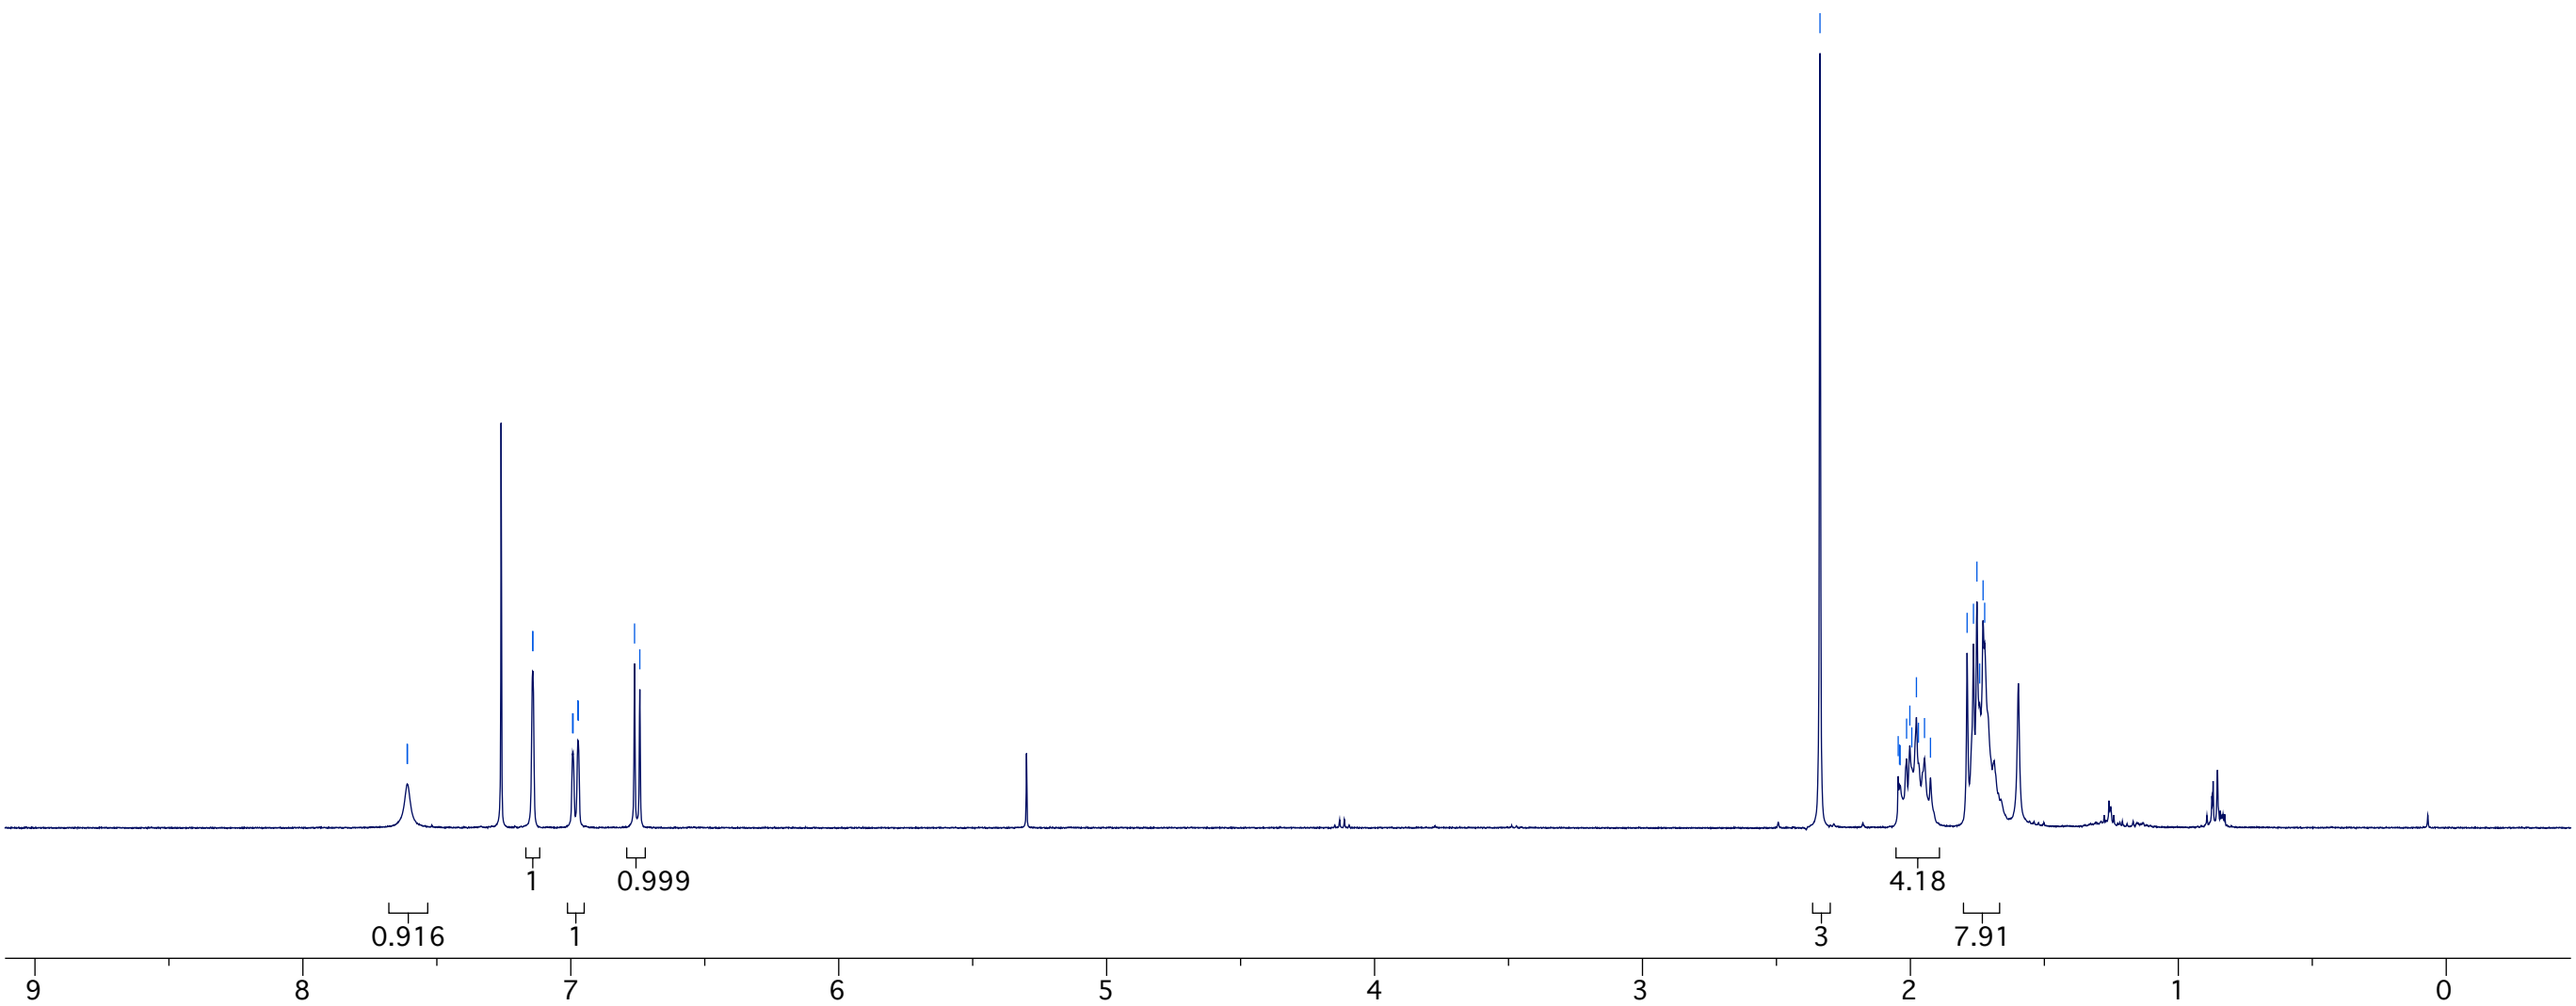



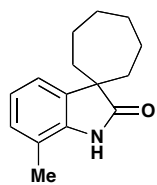

15

$^{13}\text{C}$ ,  $\text{CDCl}_3$ , 125 MHz

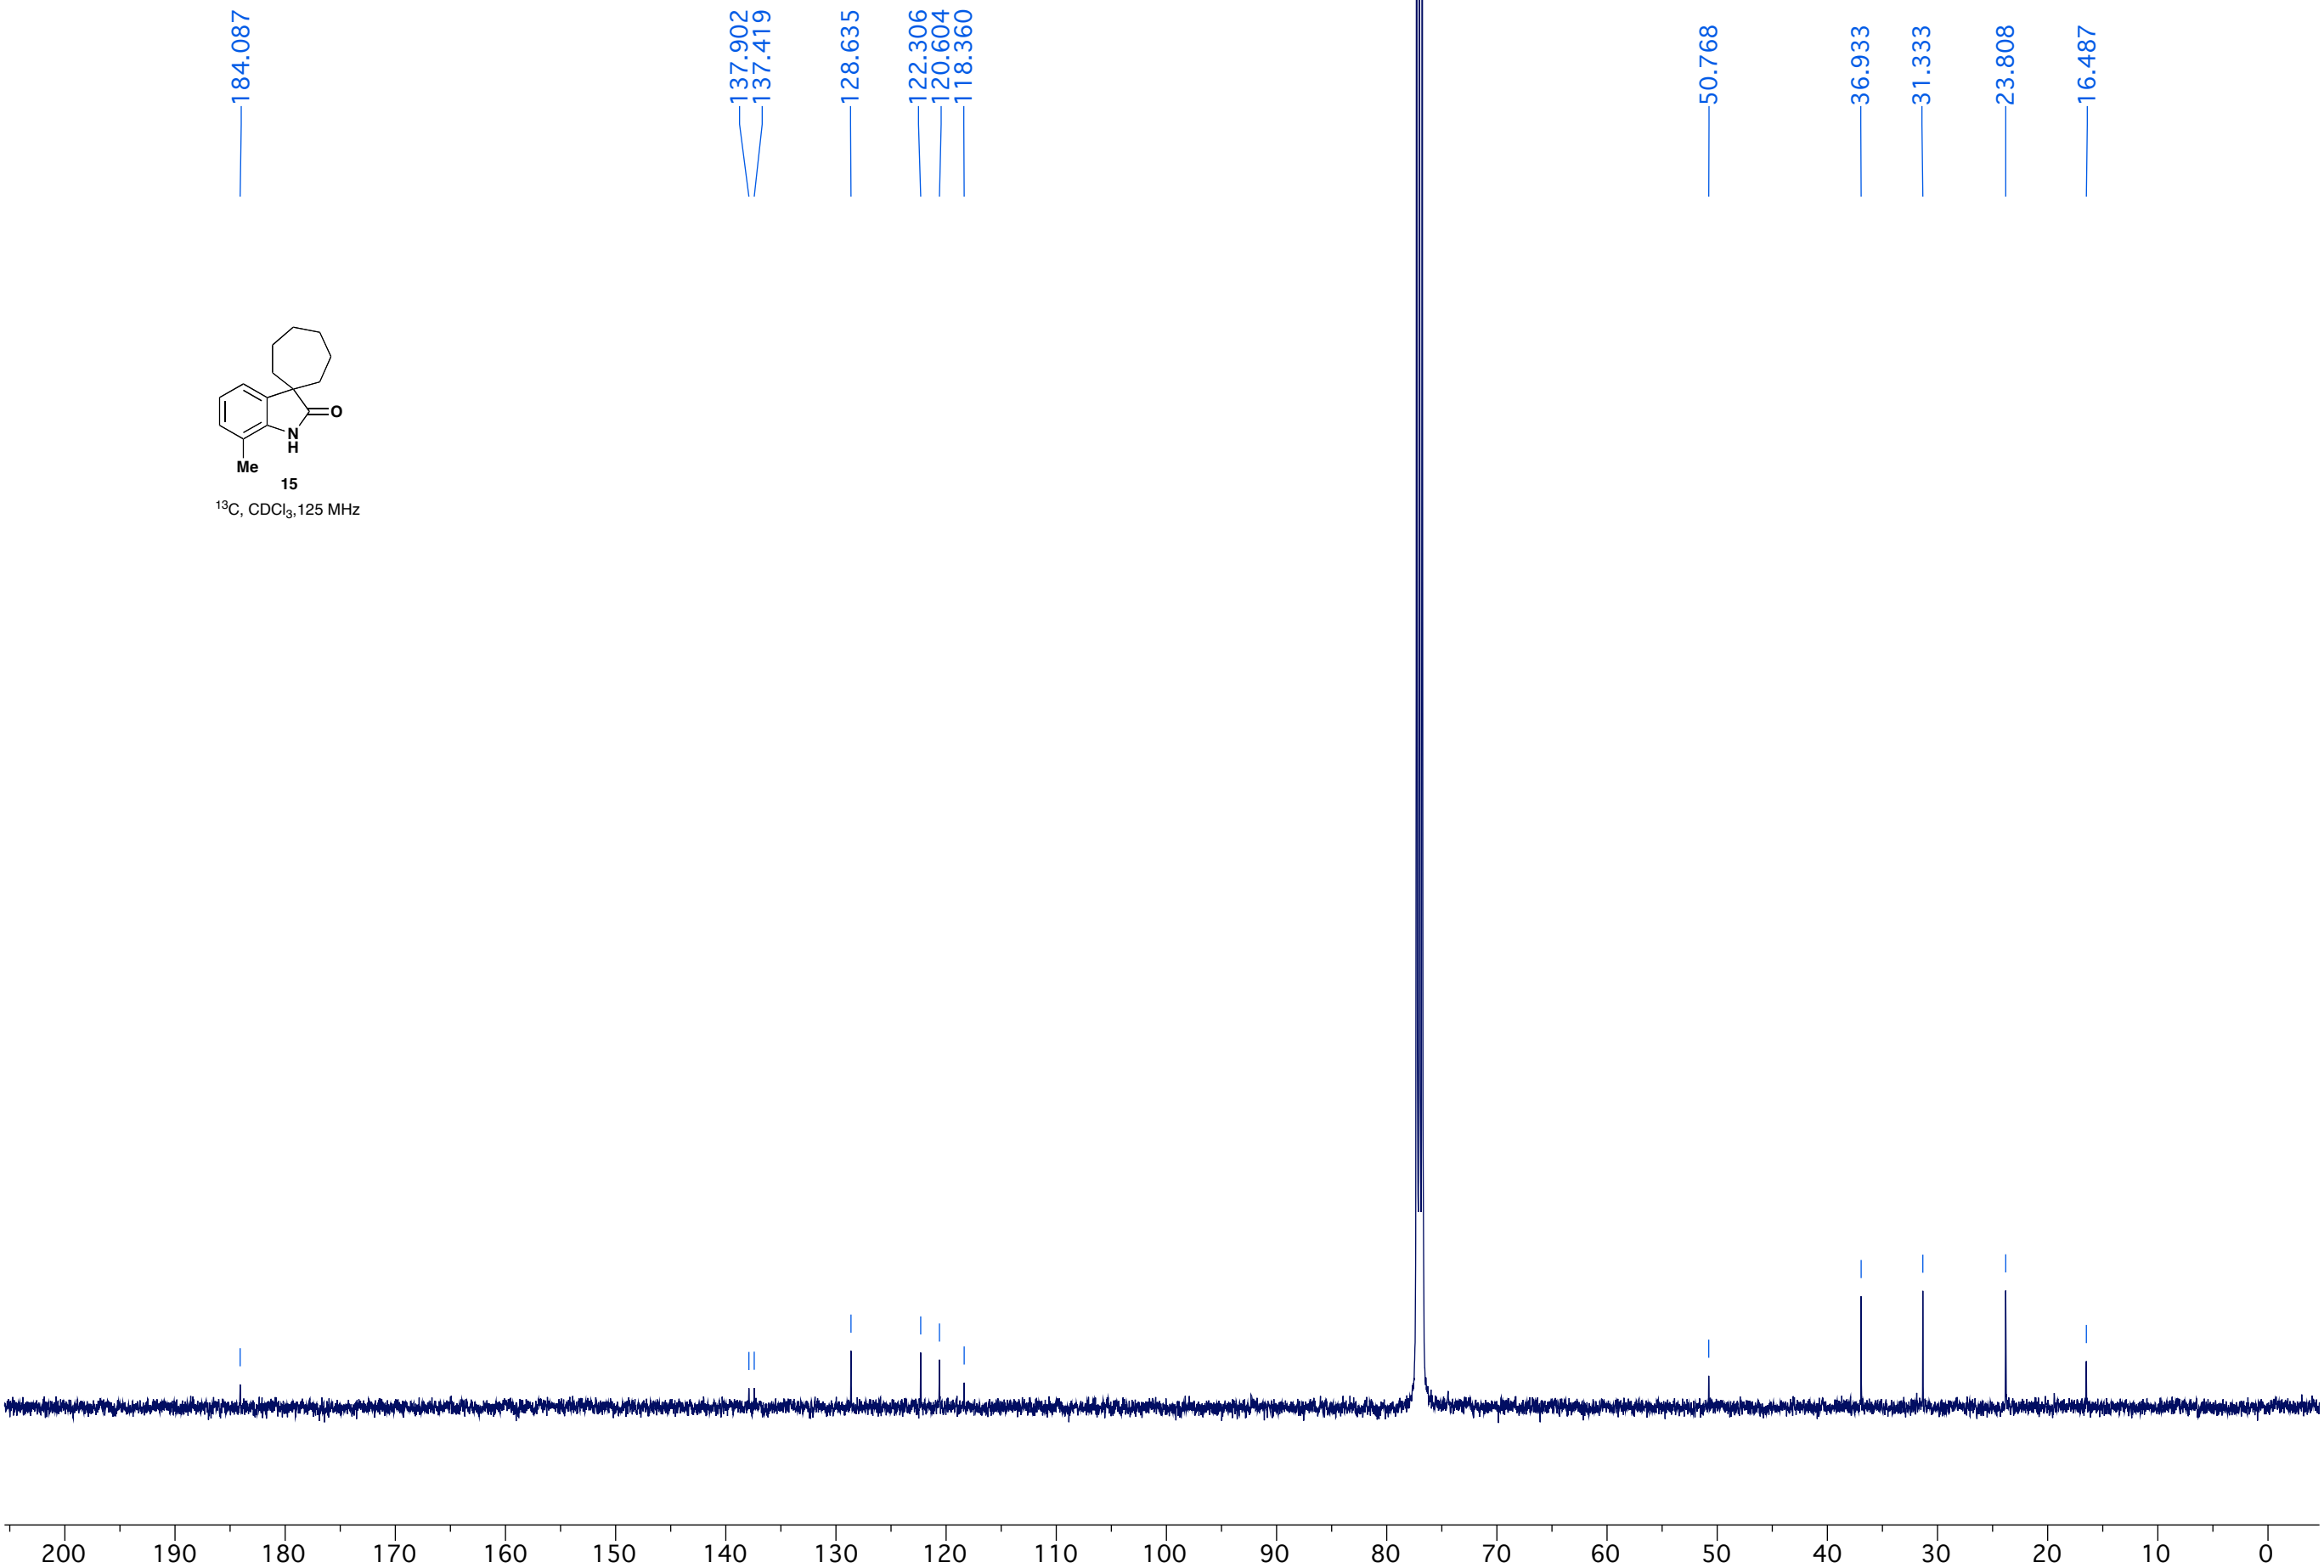

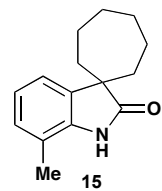

$^1\text{H}$ ,  $\text{CDCl}_3$ , 300 MHz

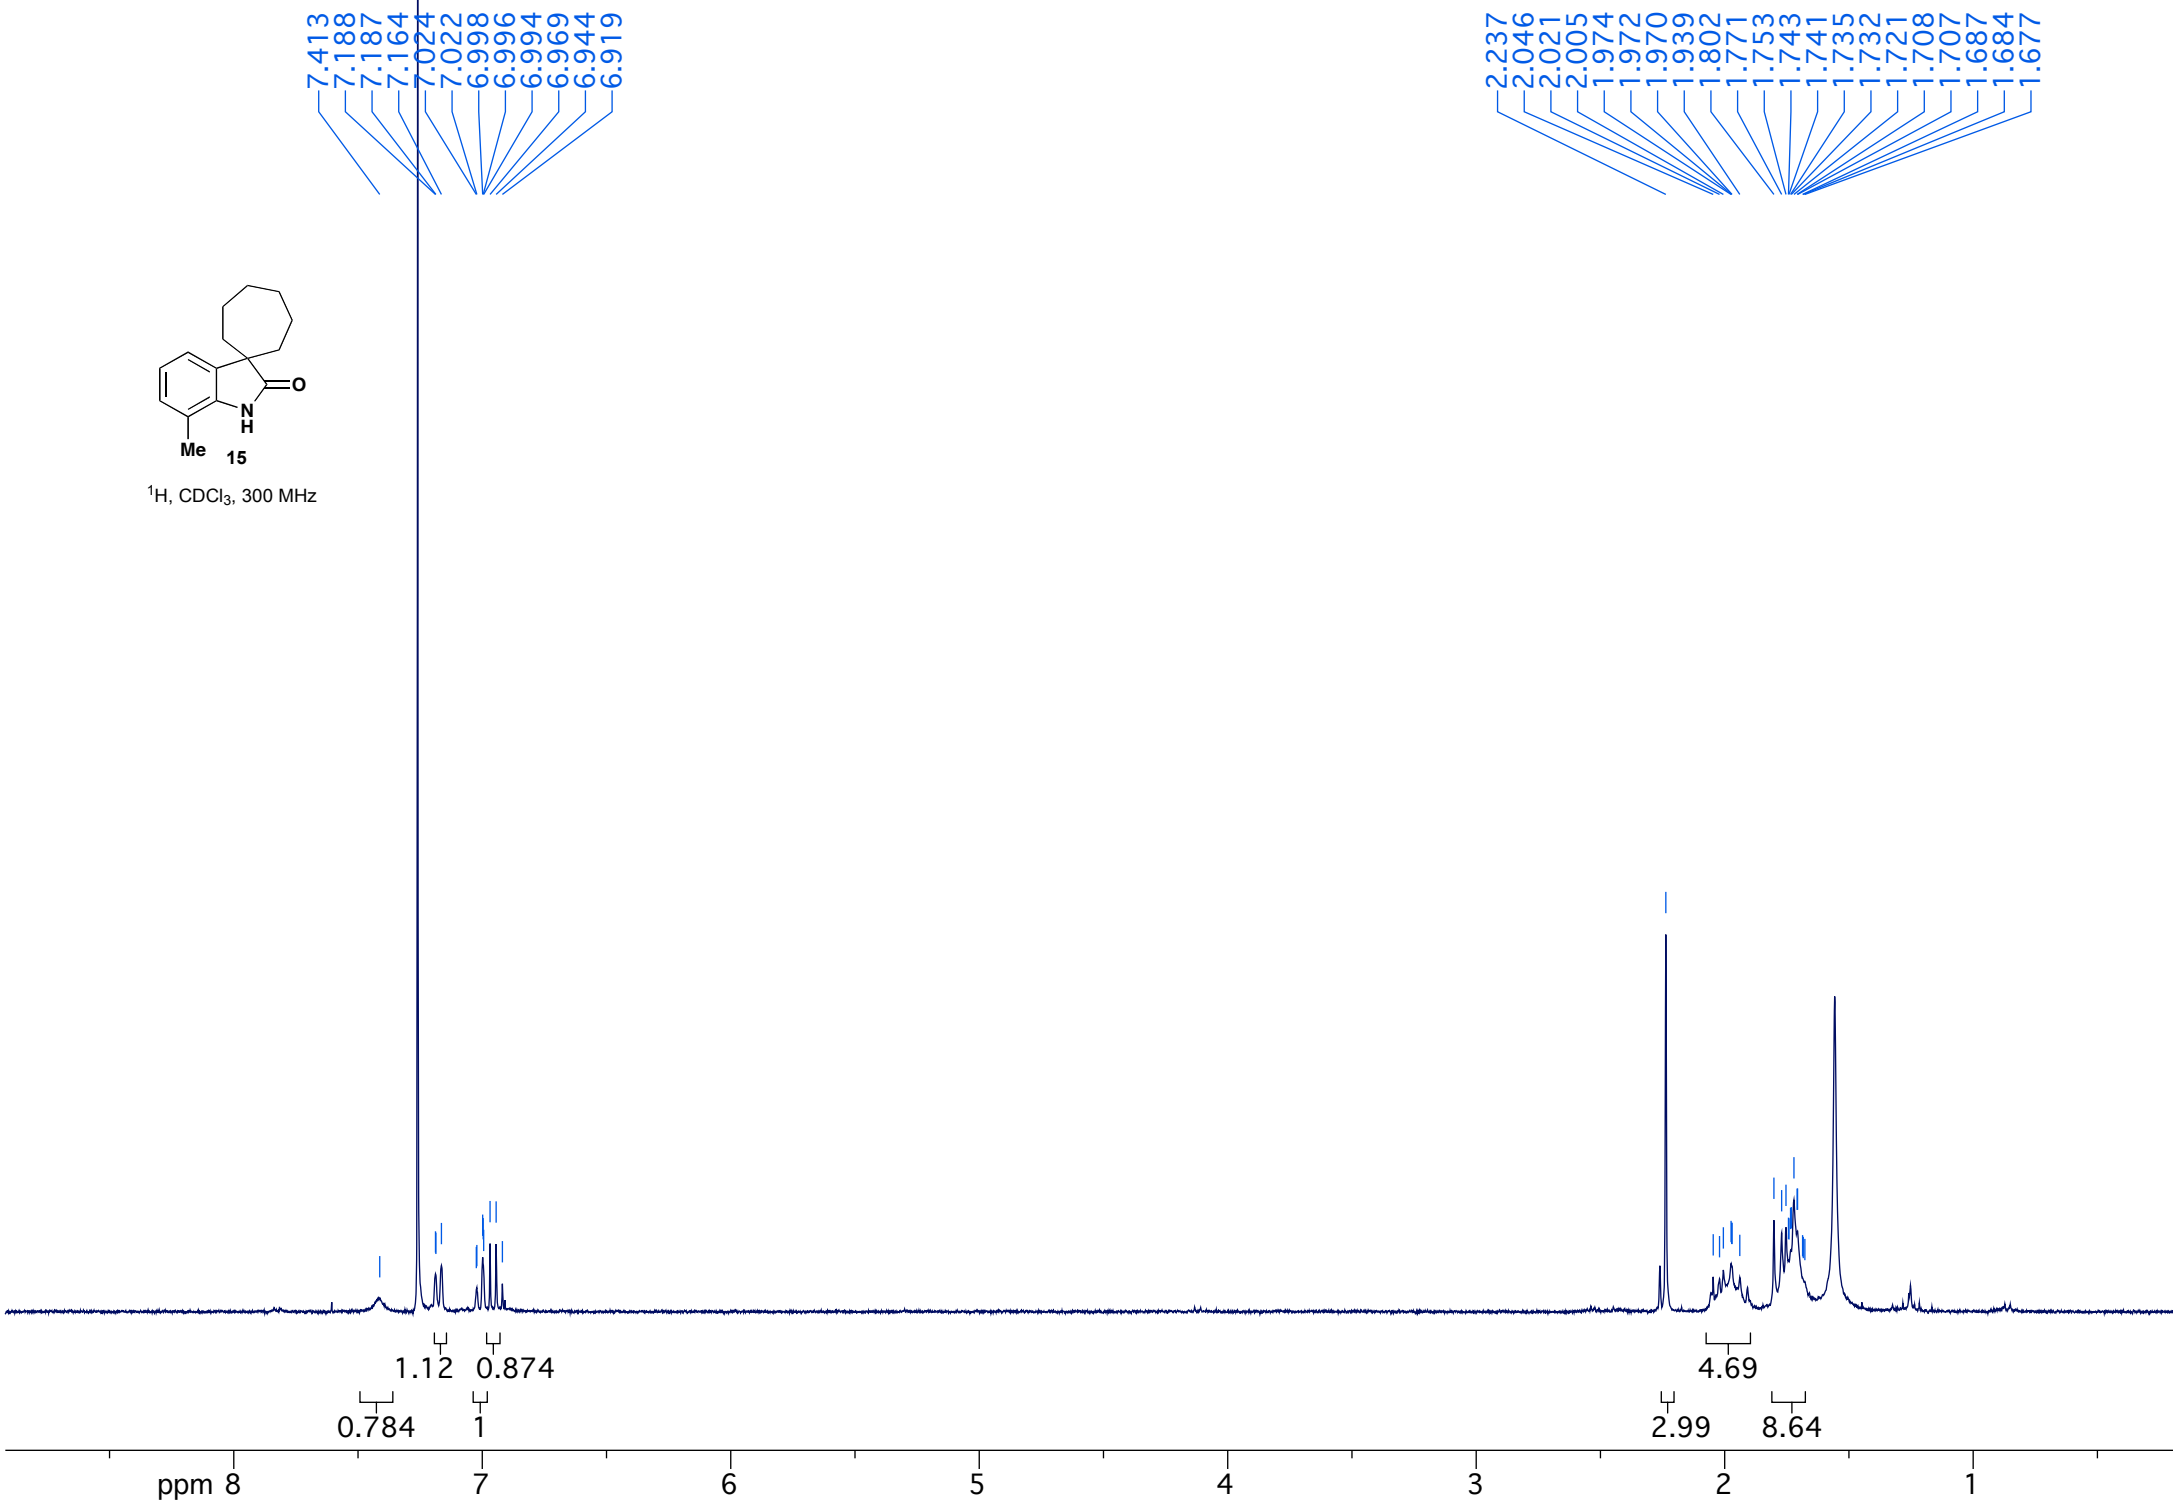

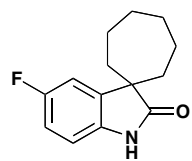

**16**

$^{13}\text{C}$ ,  $\text{CDCl}_3$ , 75 MHz

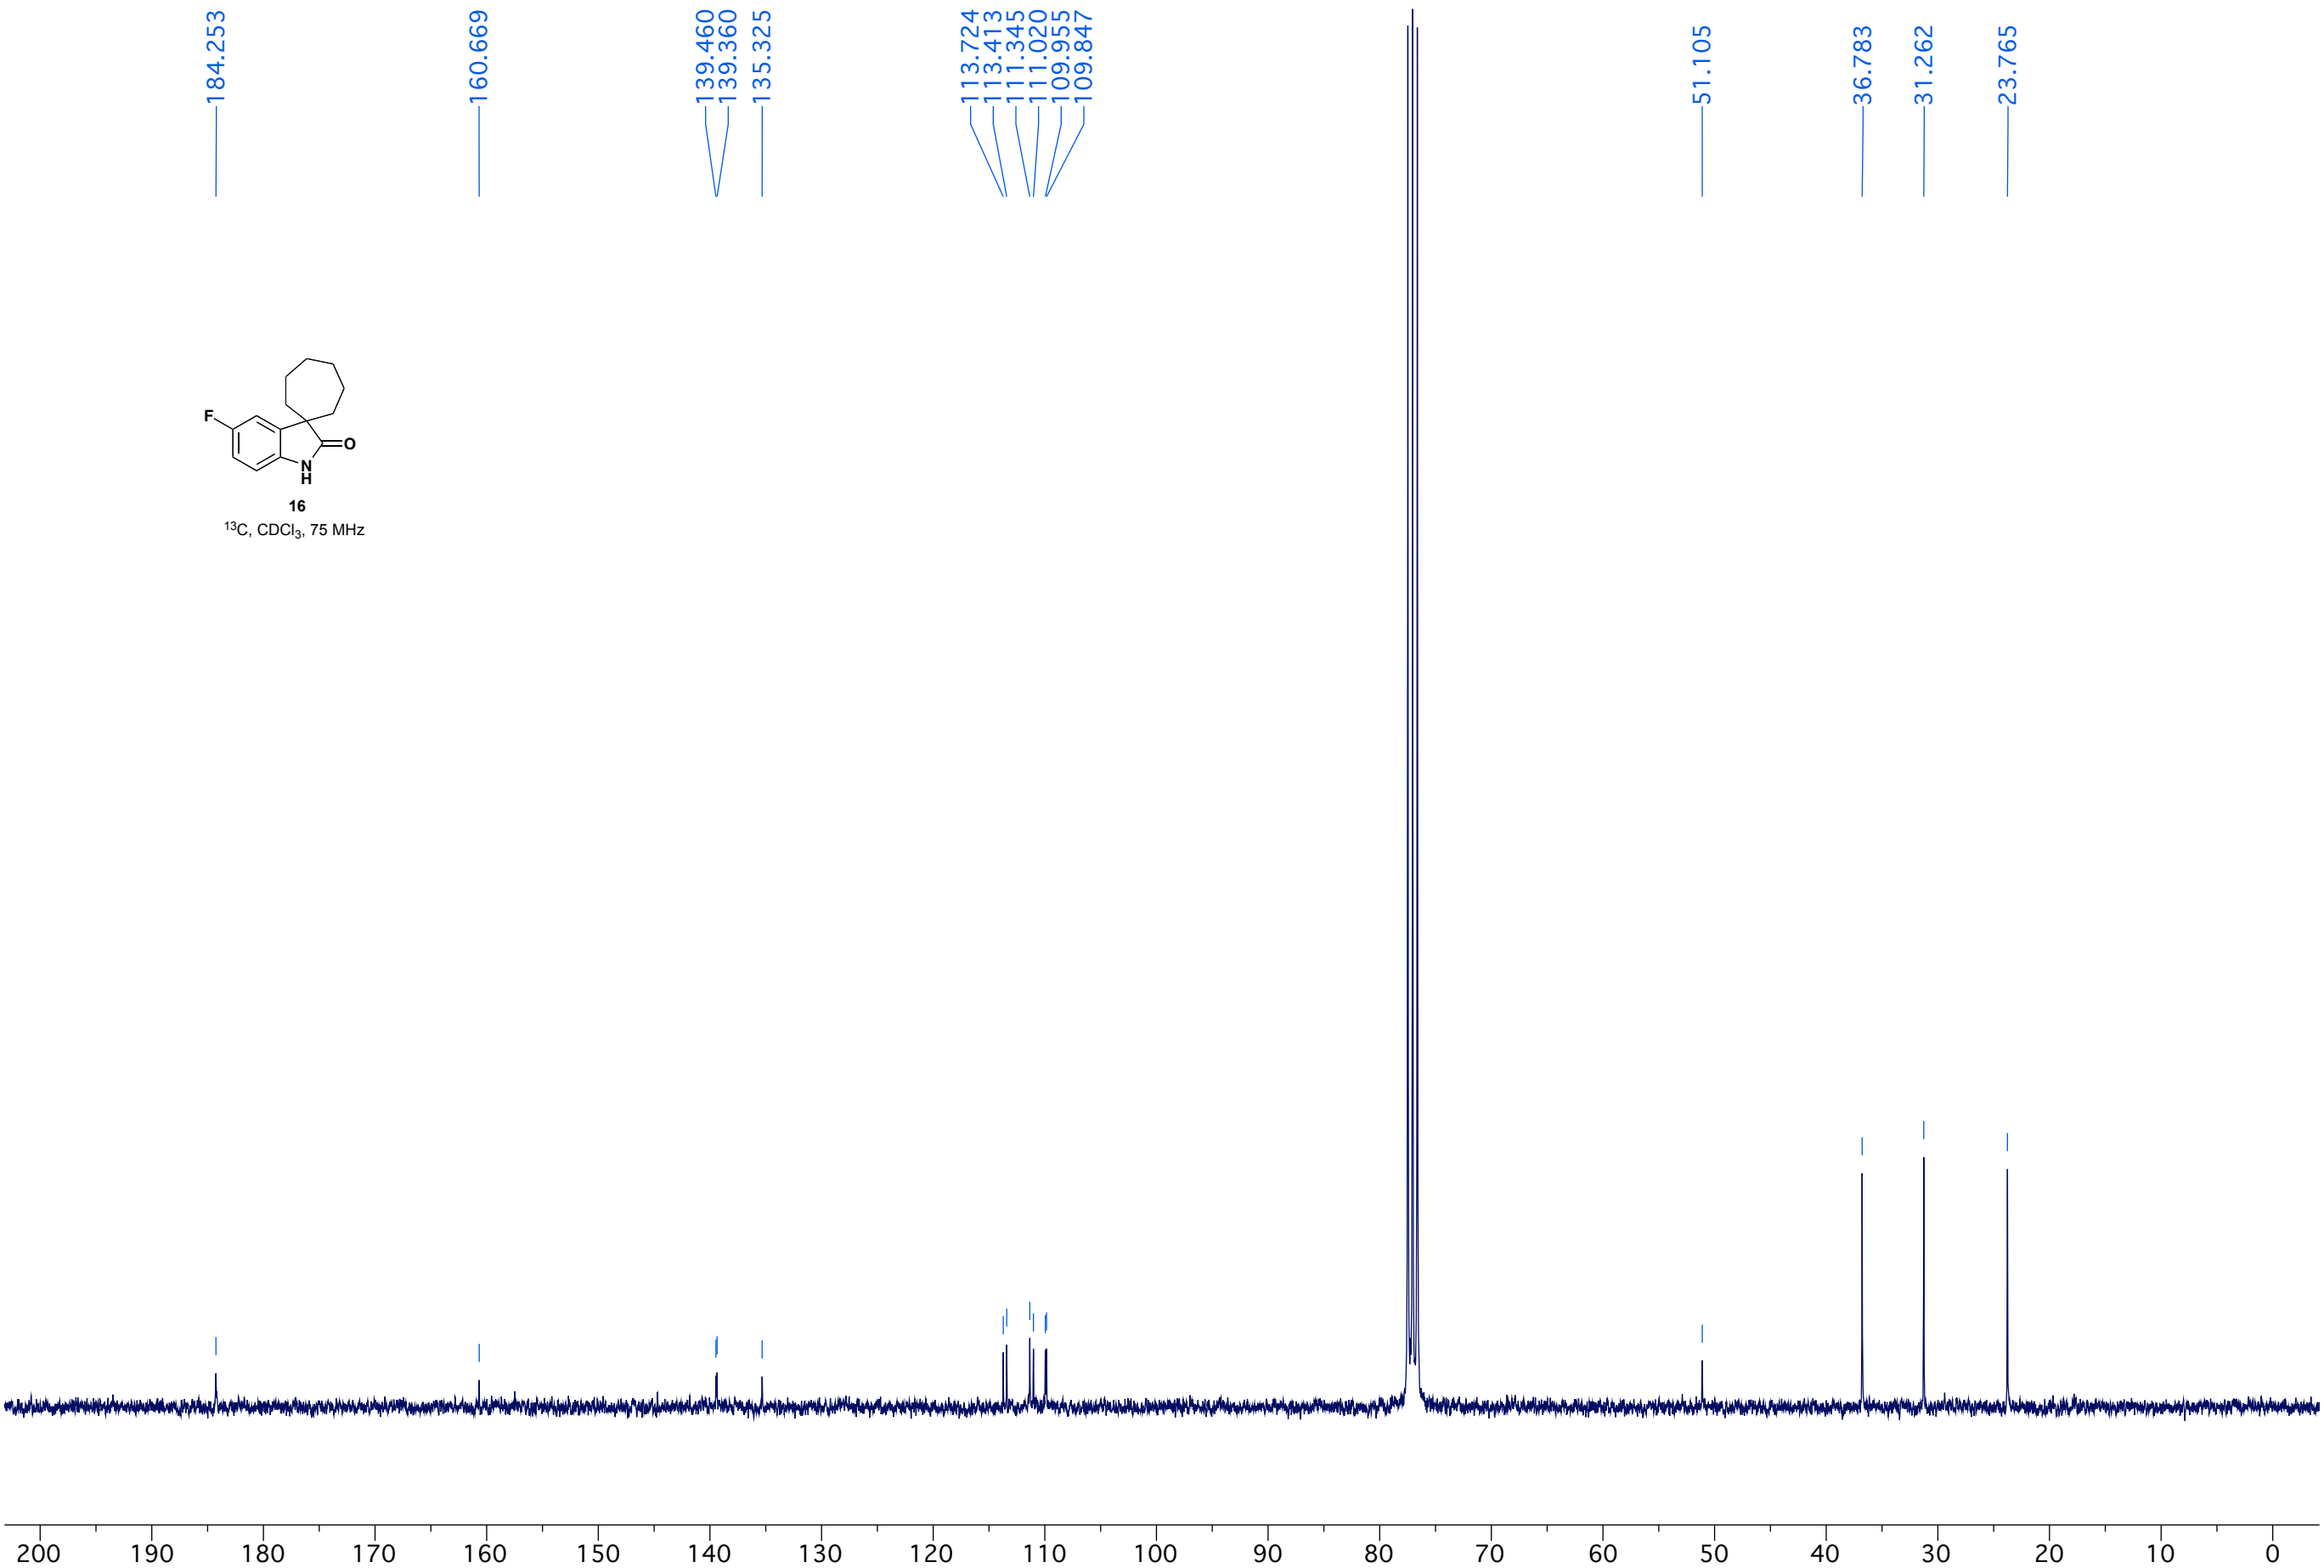

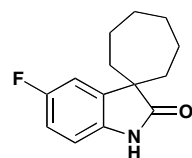

16

<sup>1</sup>H, CDCl<sub>3</sub>, 300 MHz

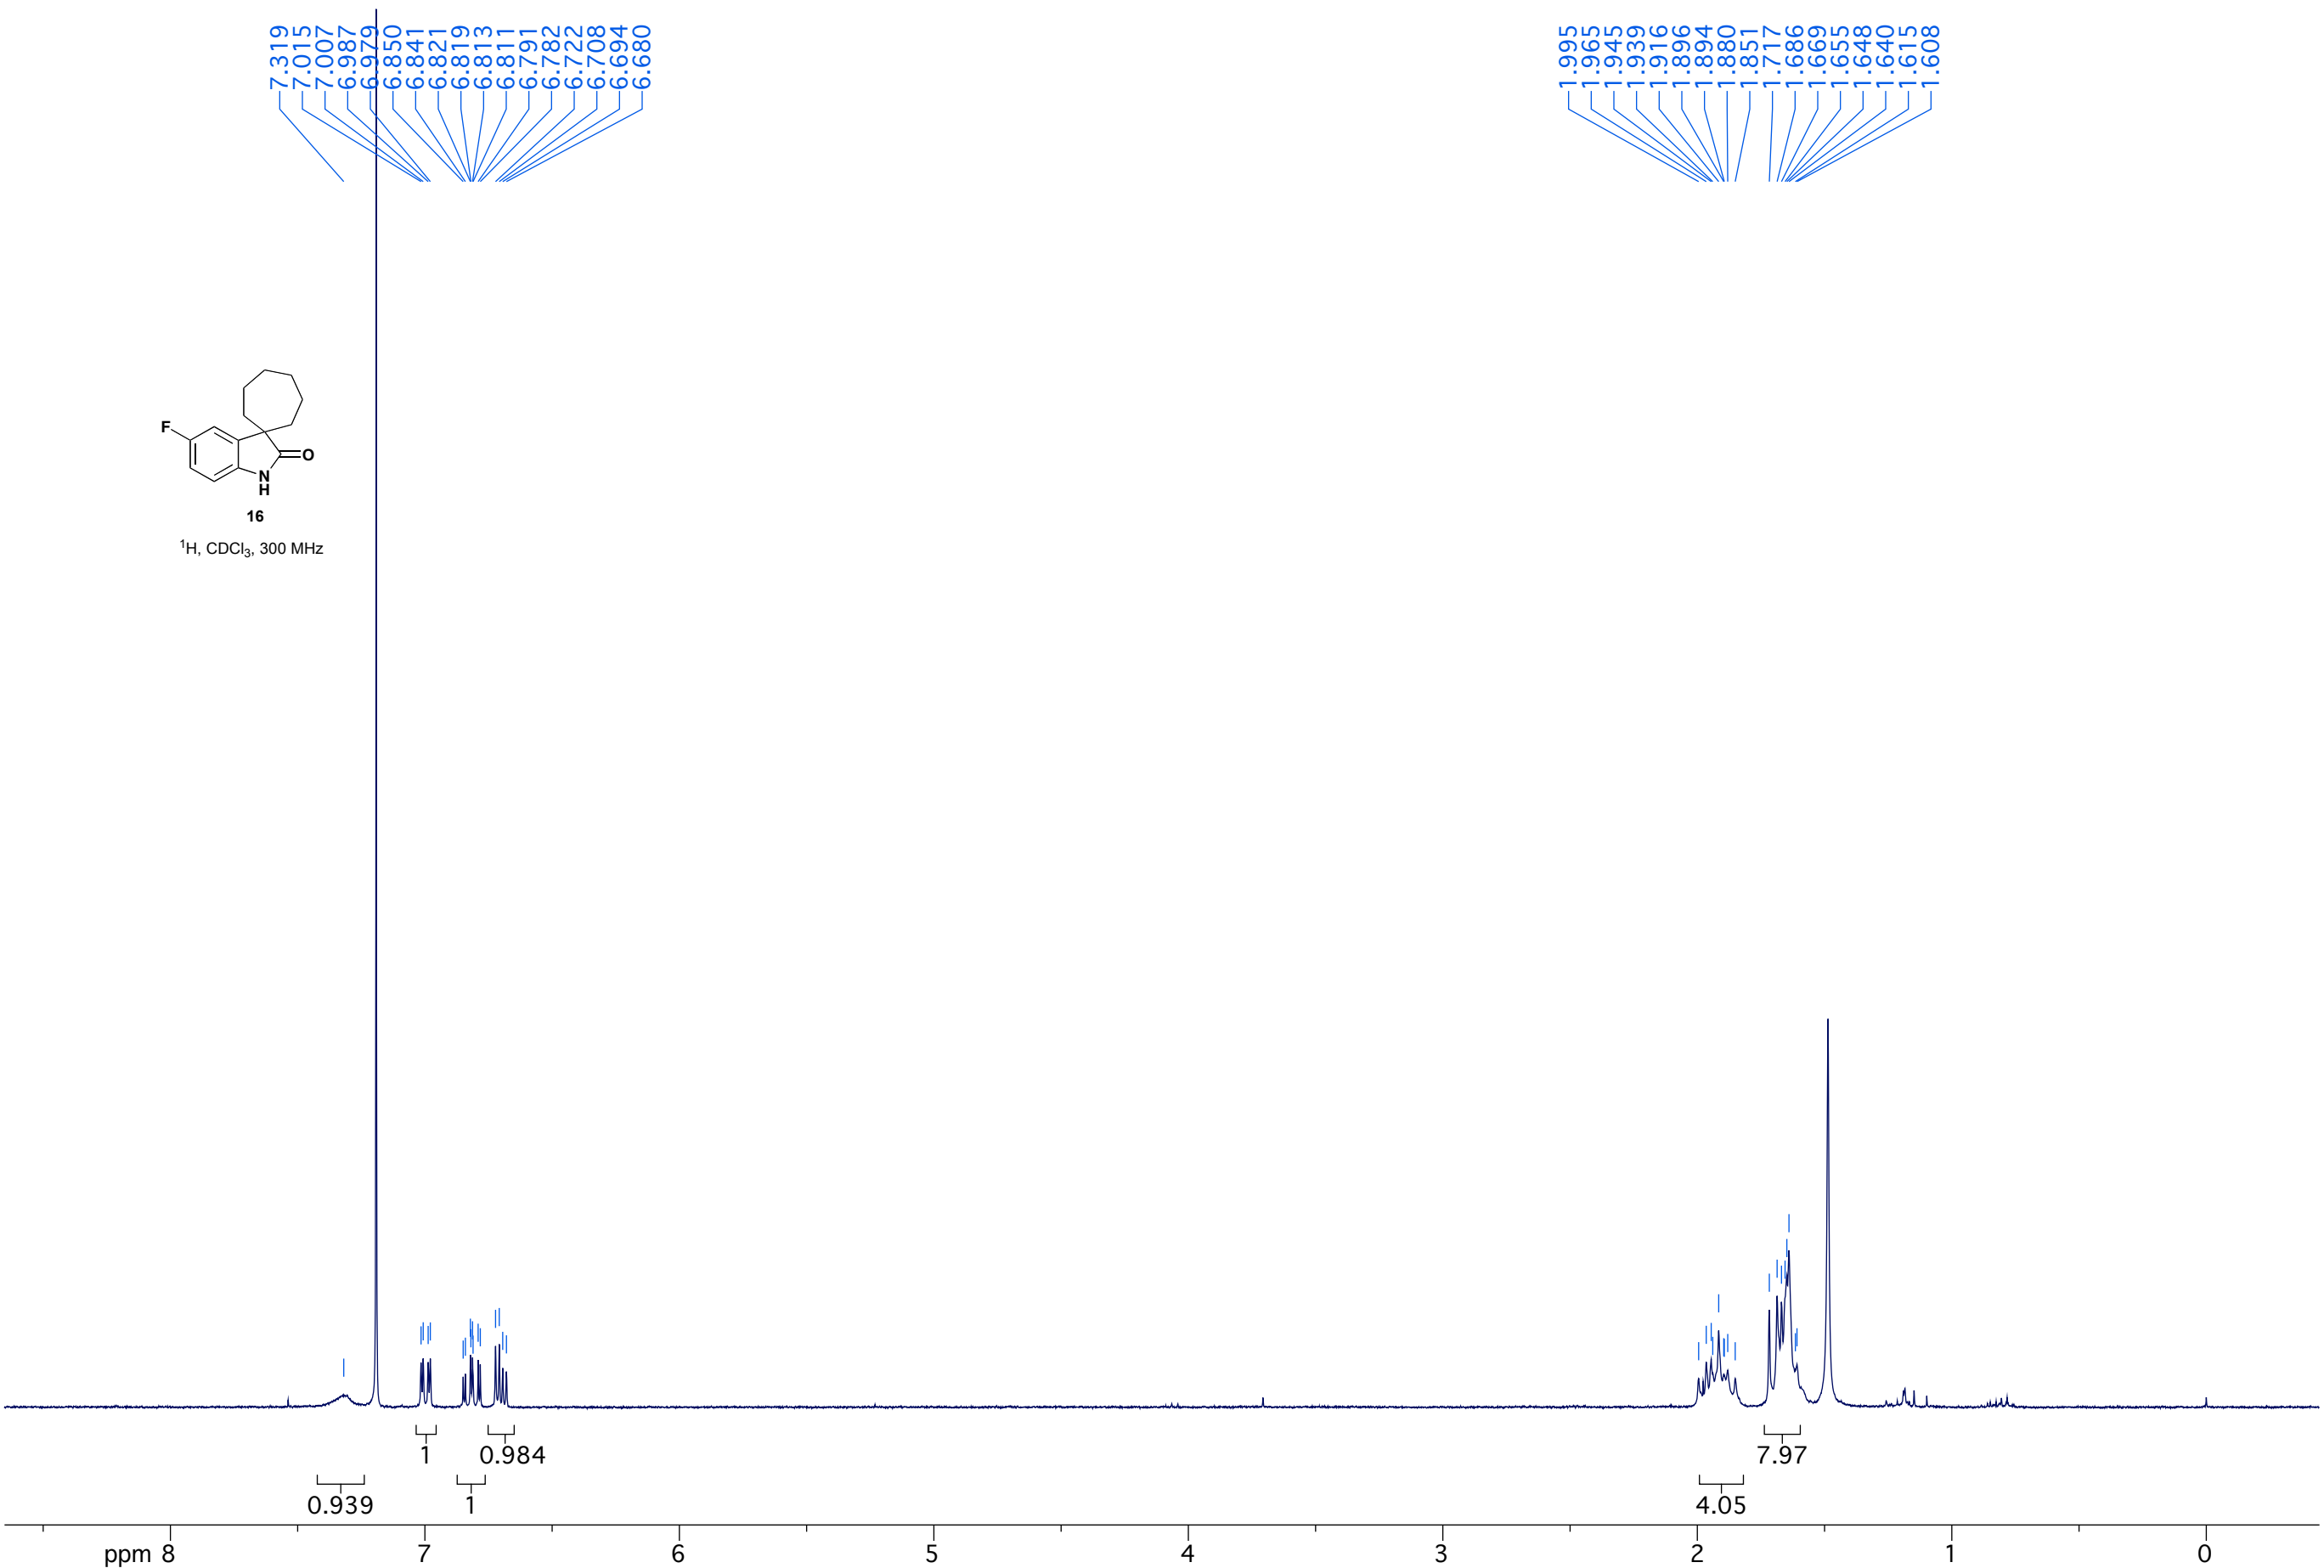

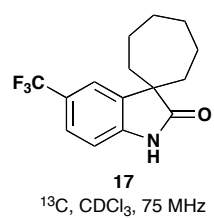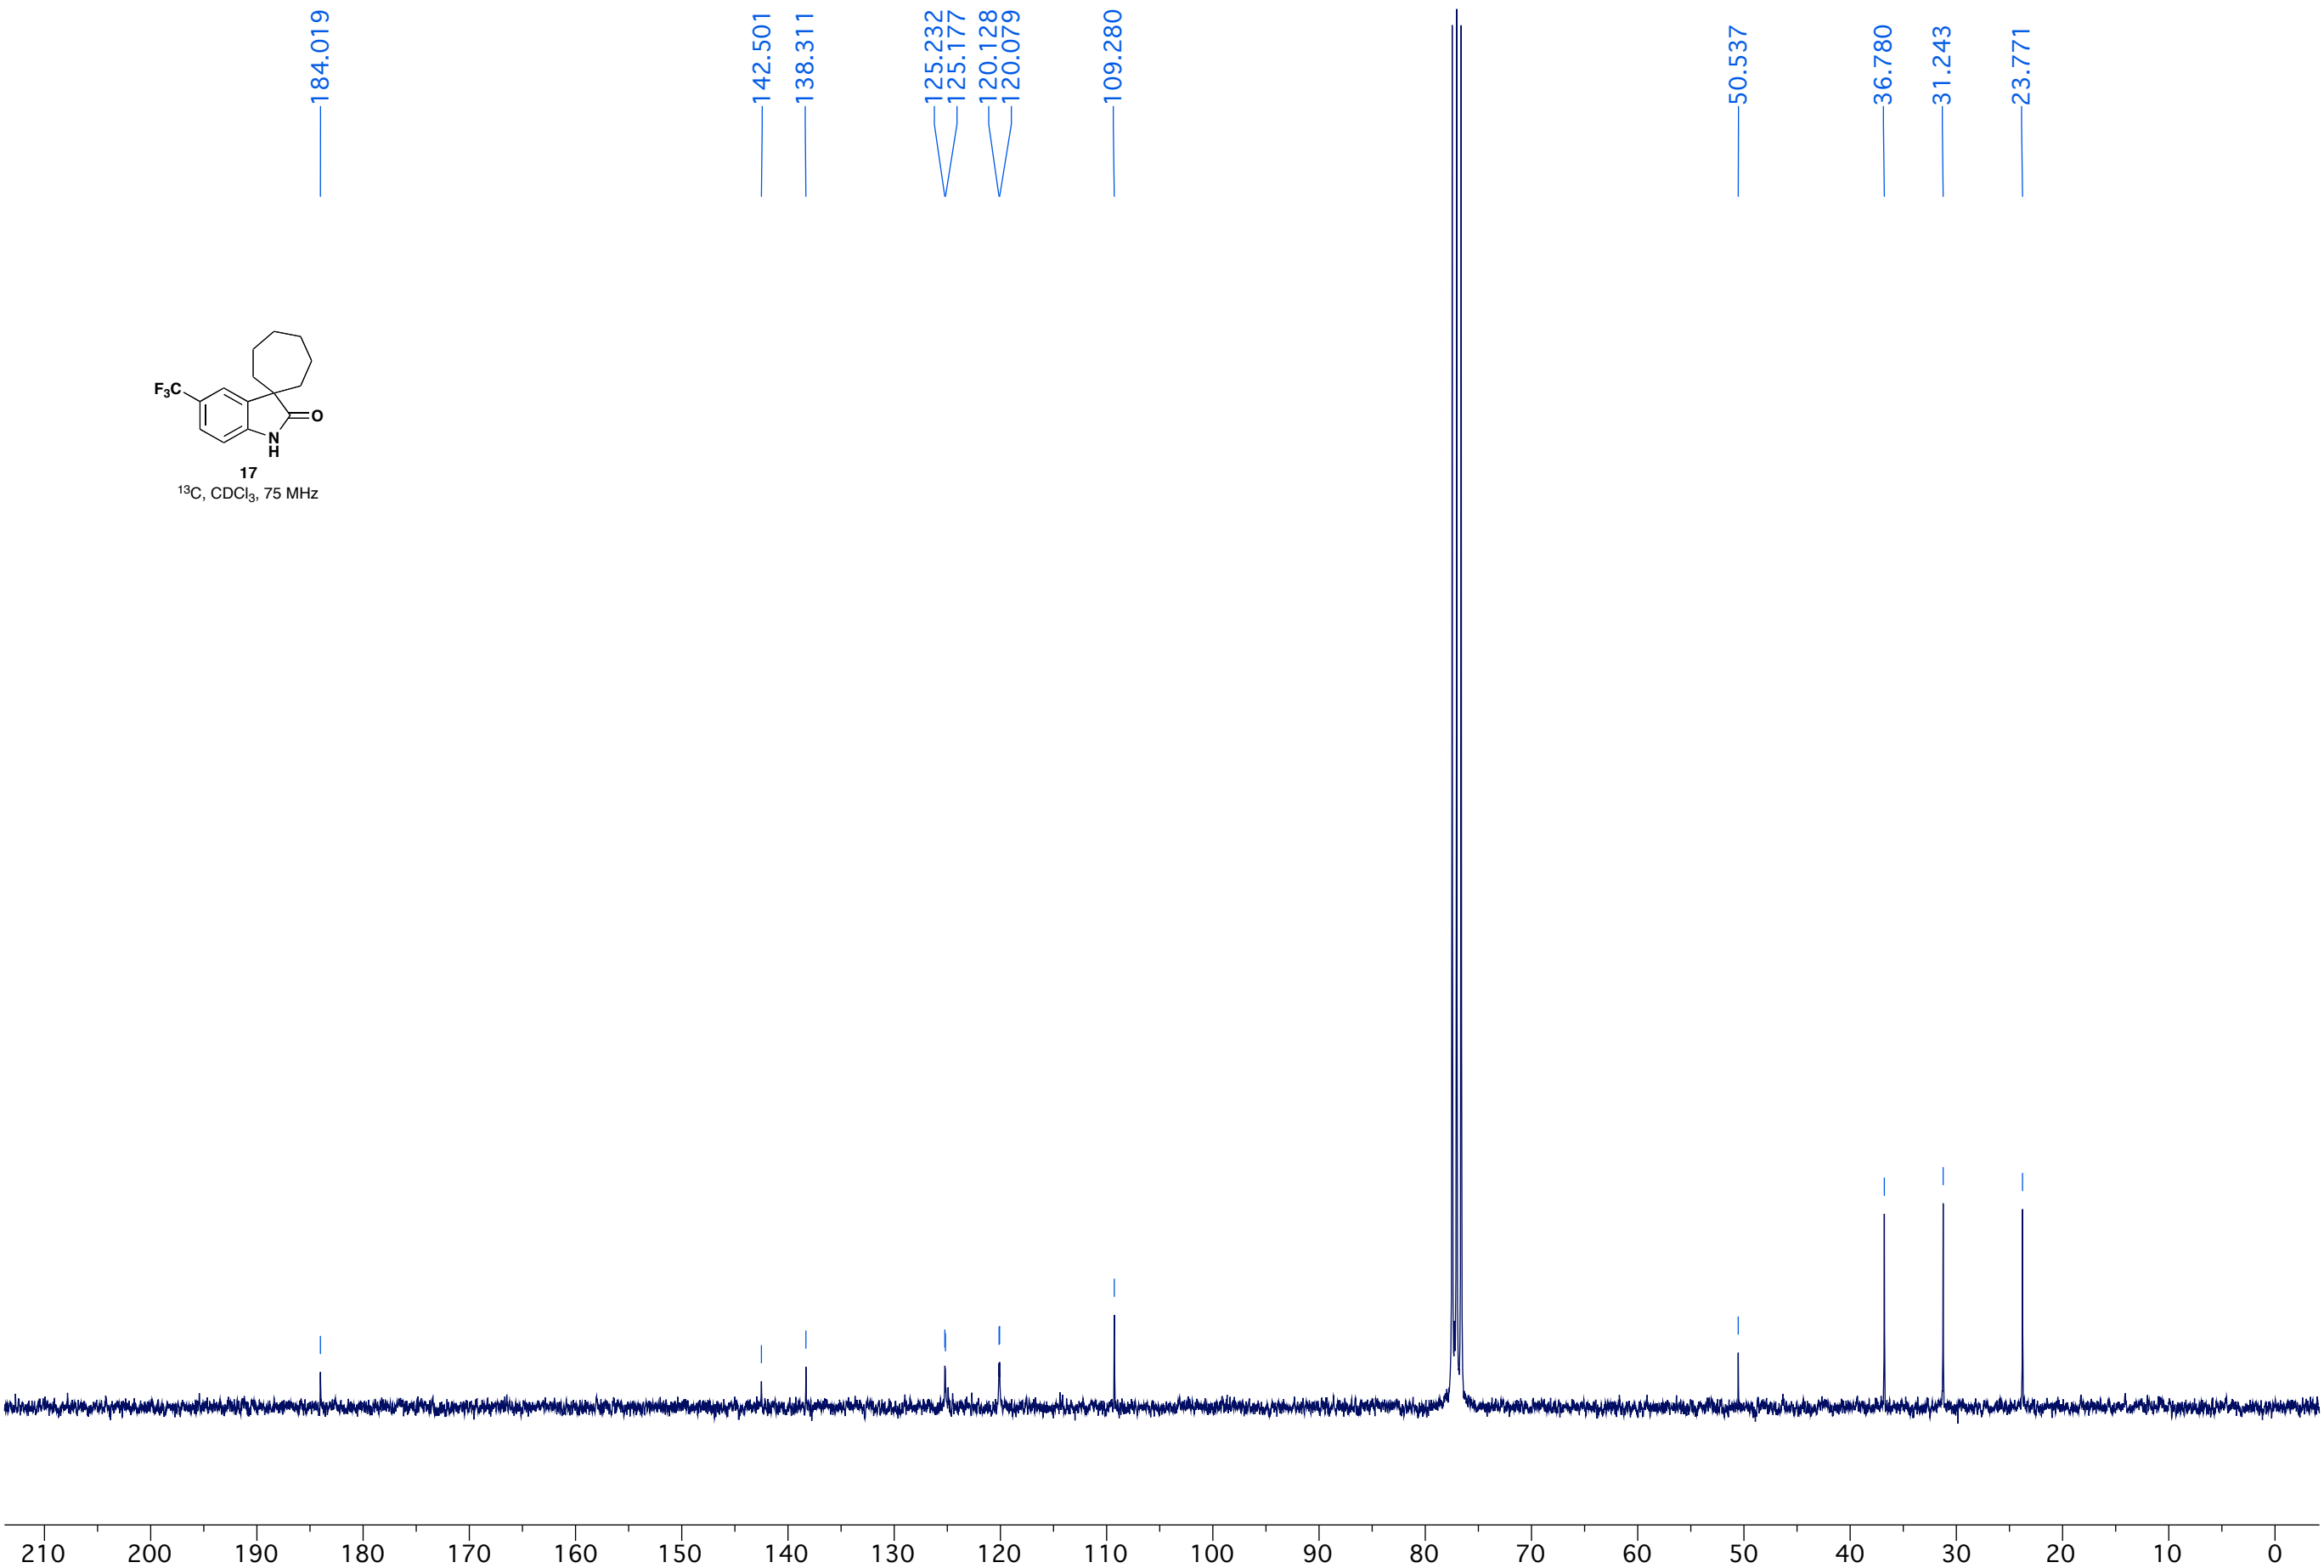

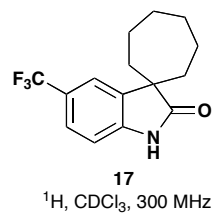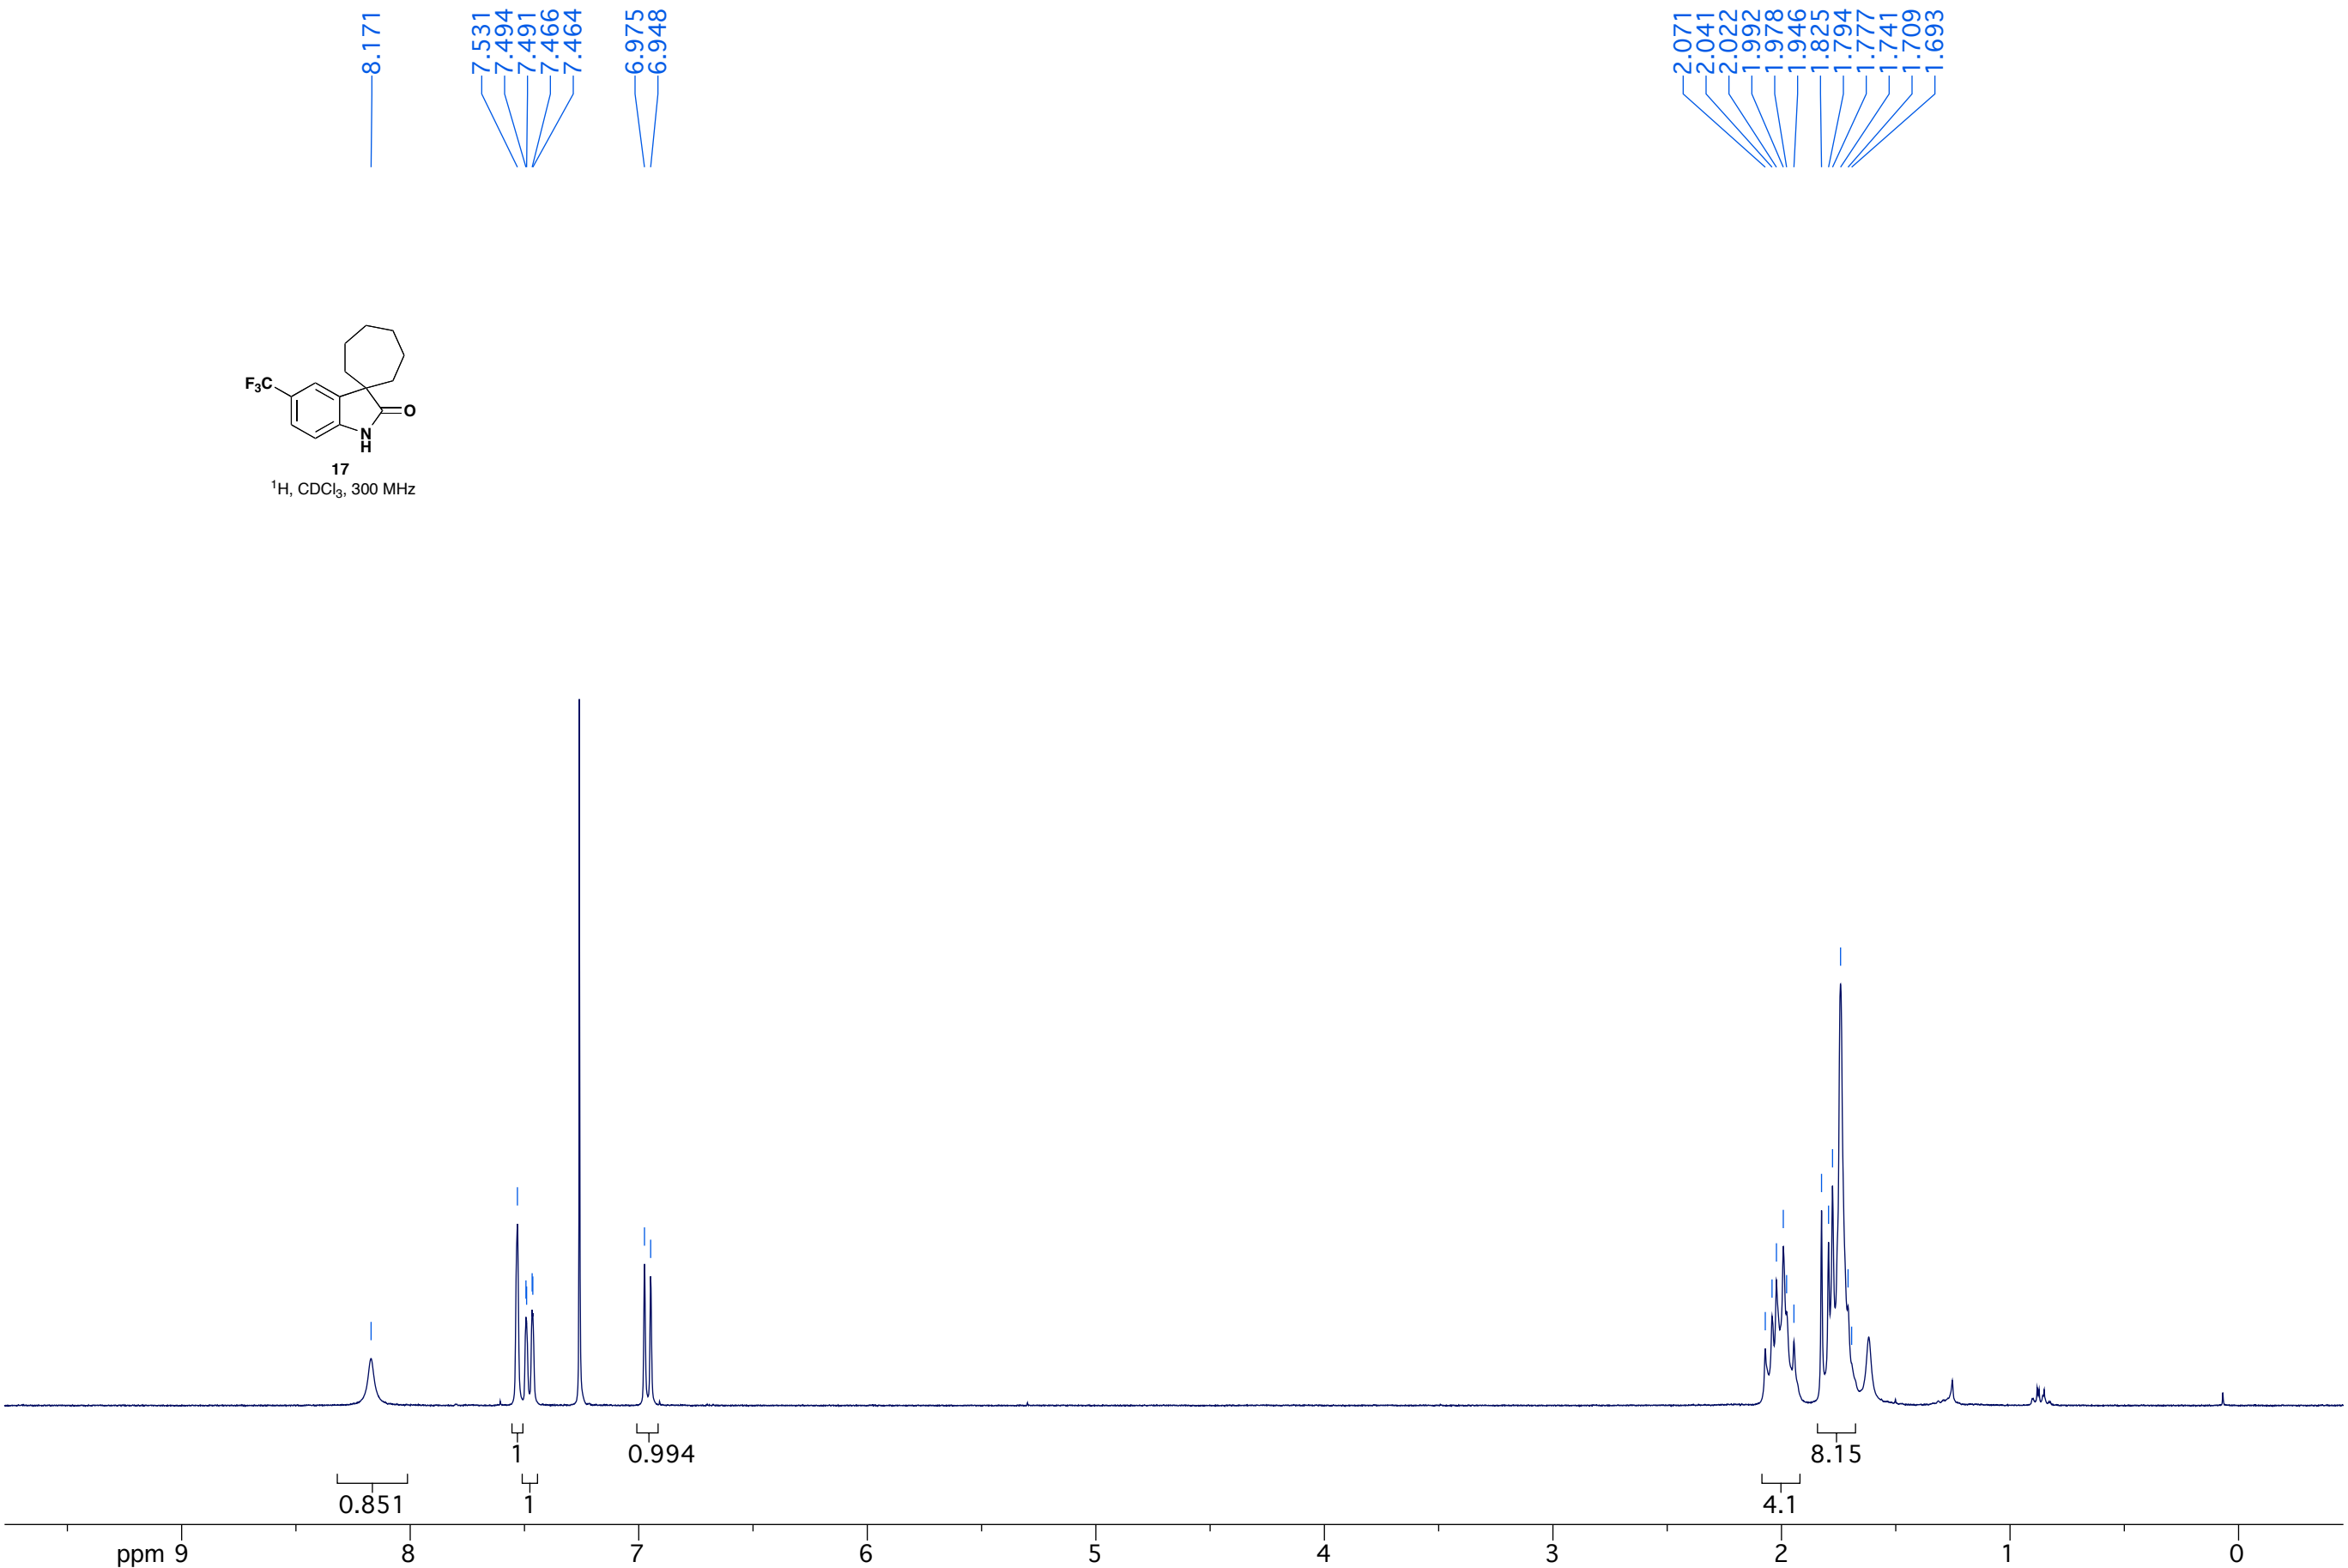

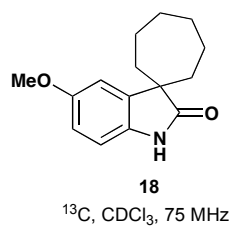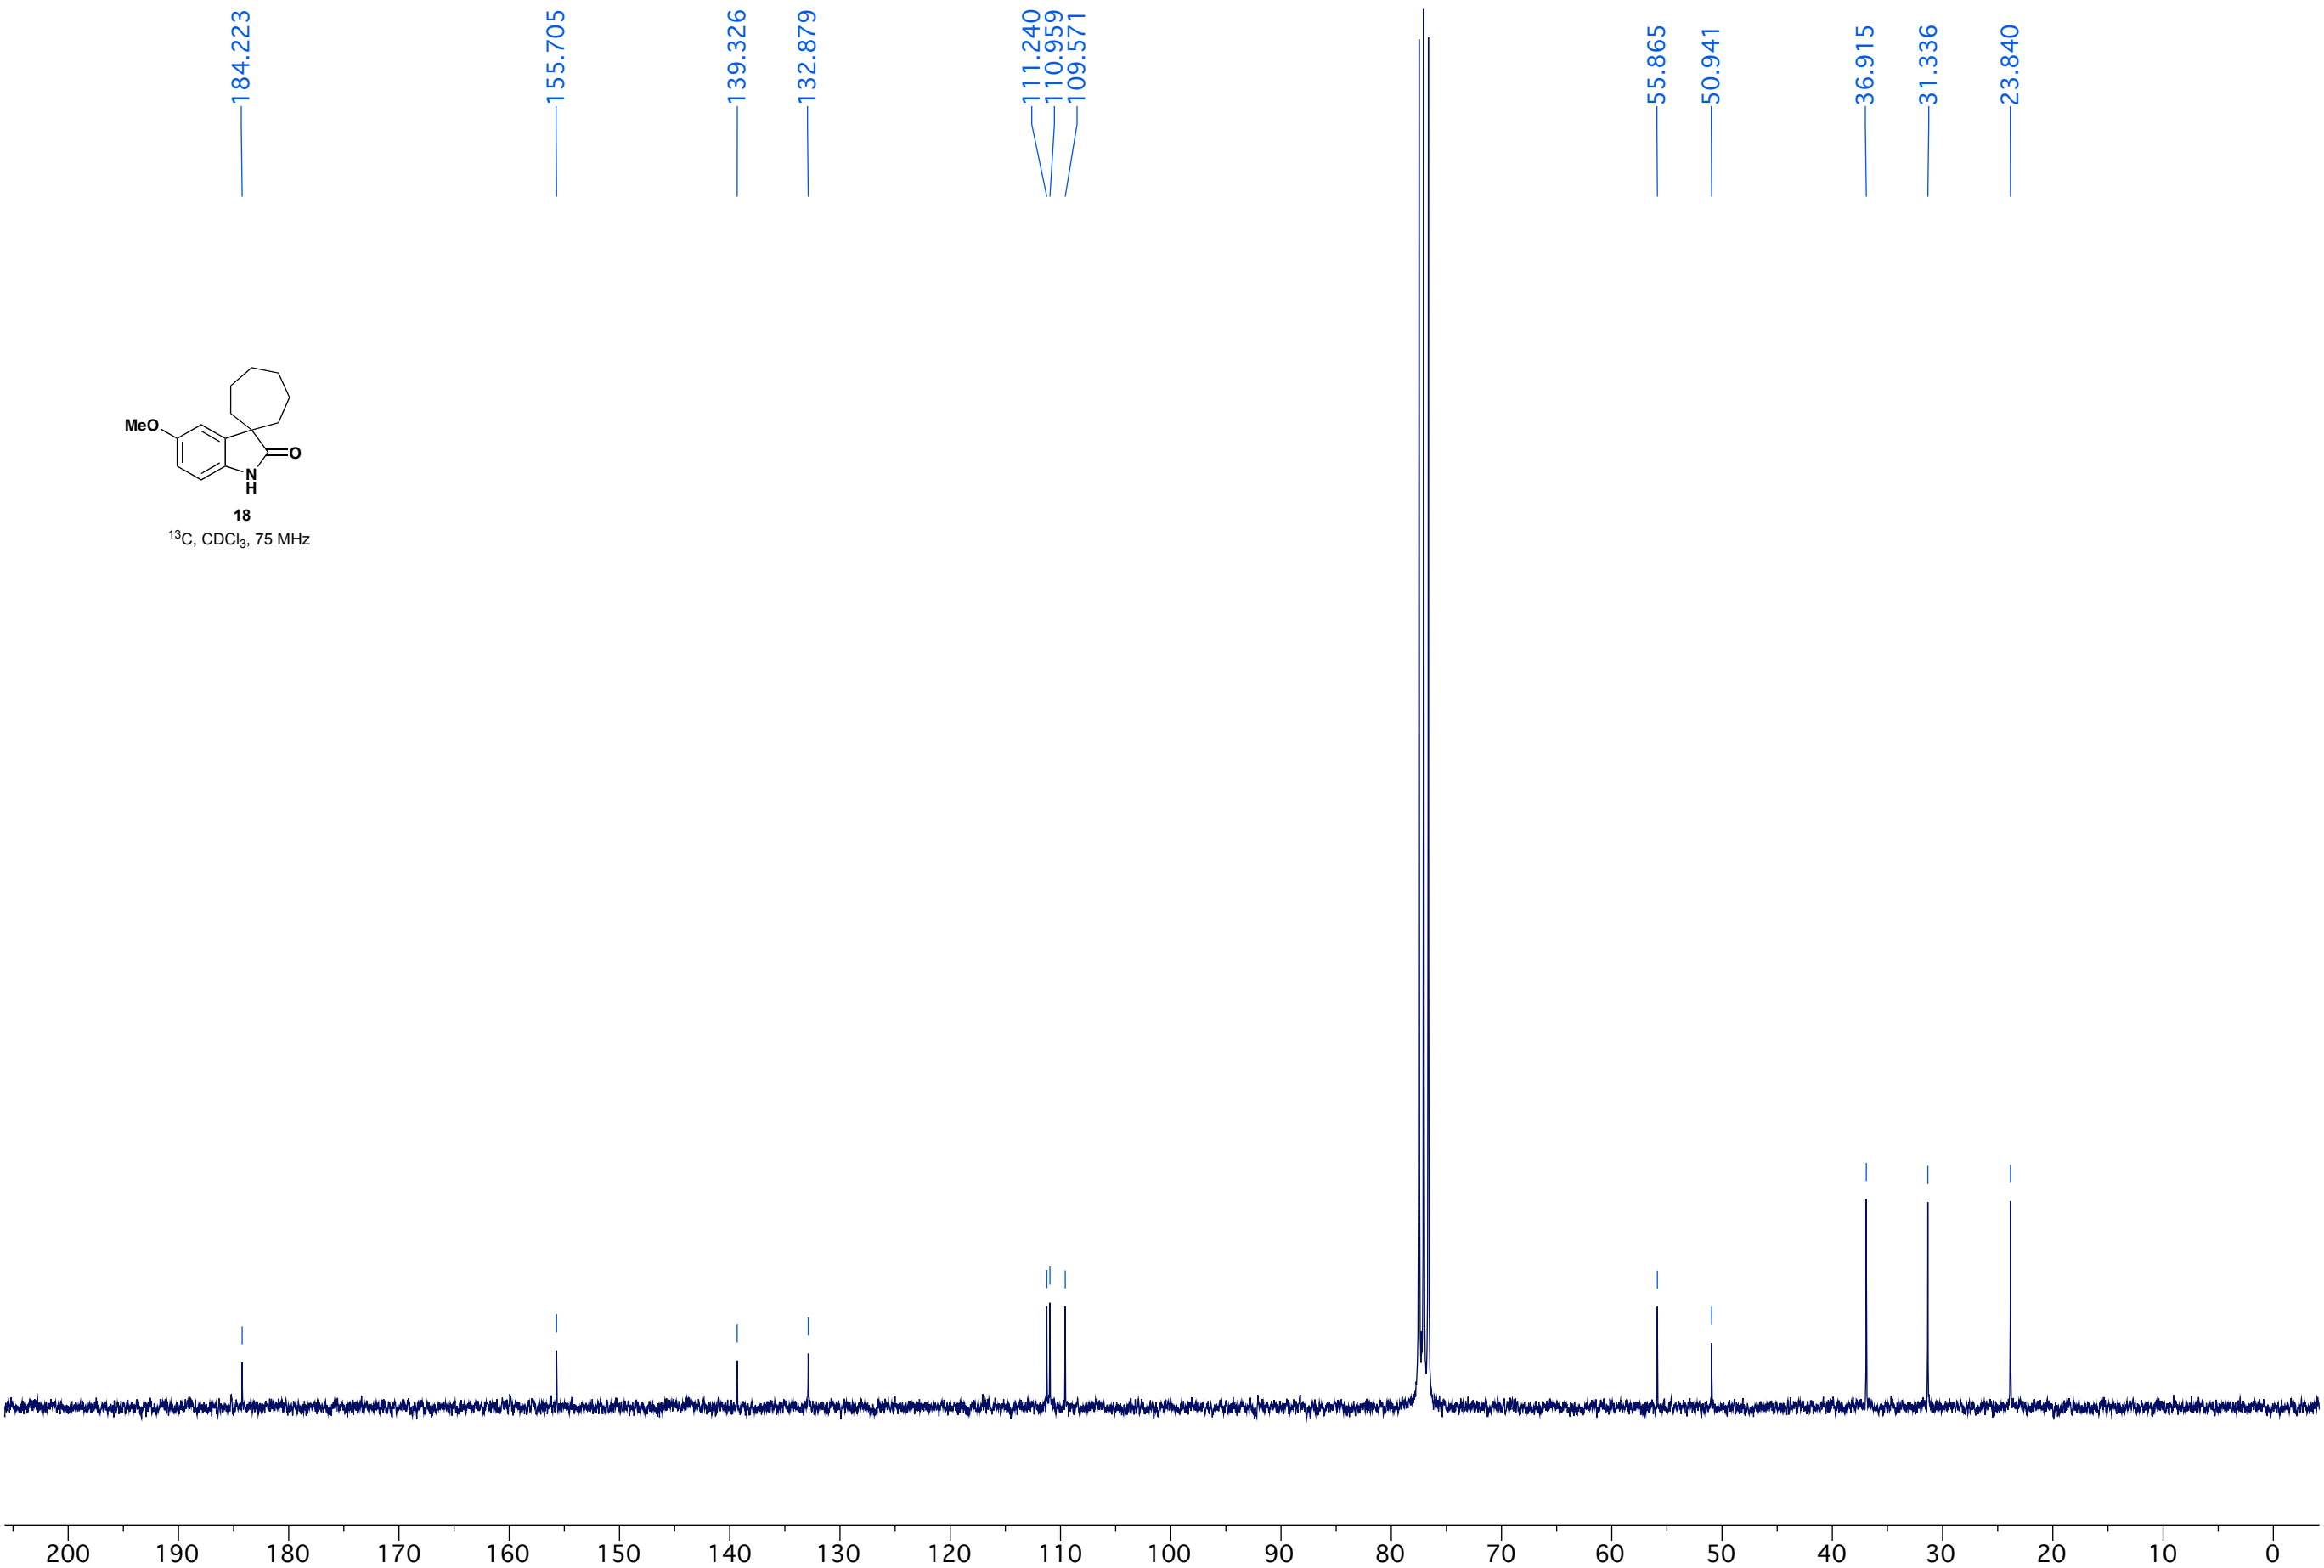

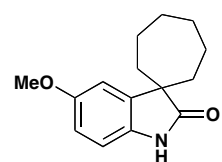

18

$^1\text{H}$ ,  $\text{CDCl}_3$ , 300 MHz

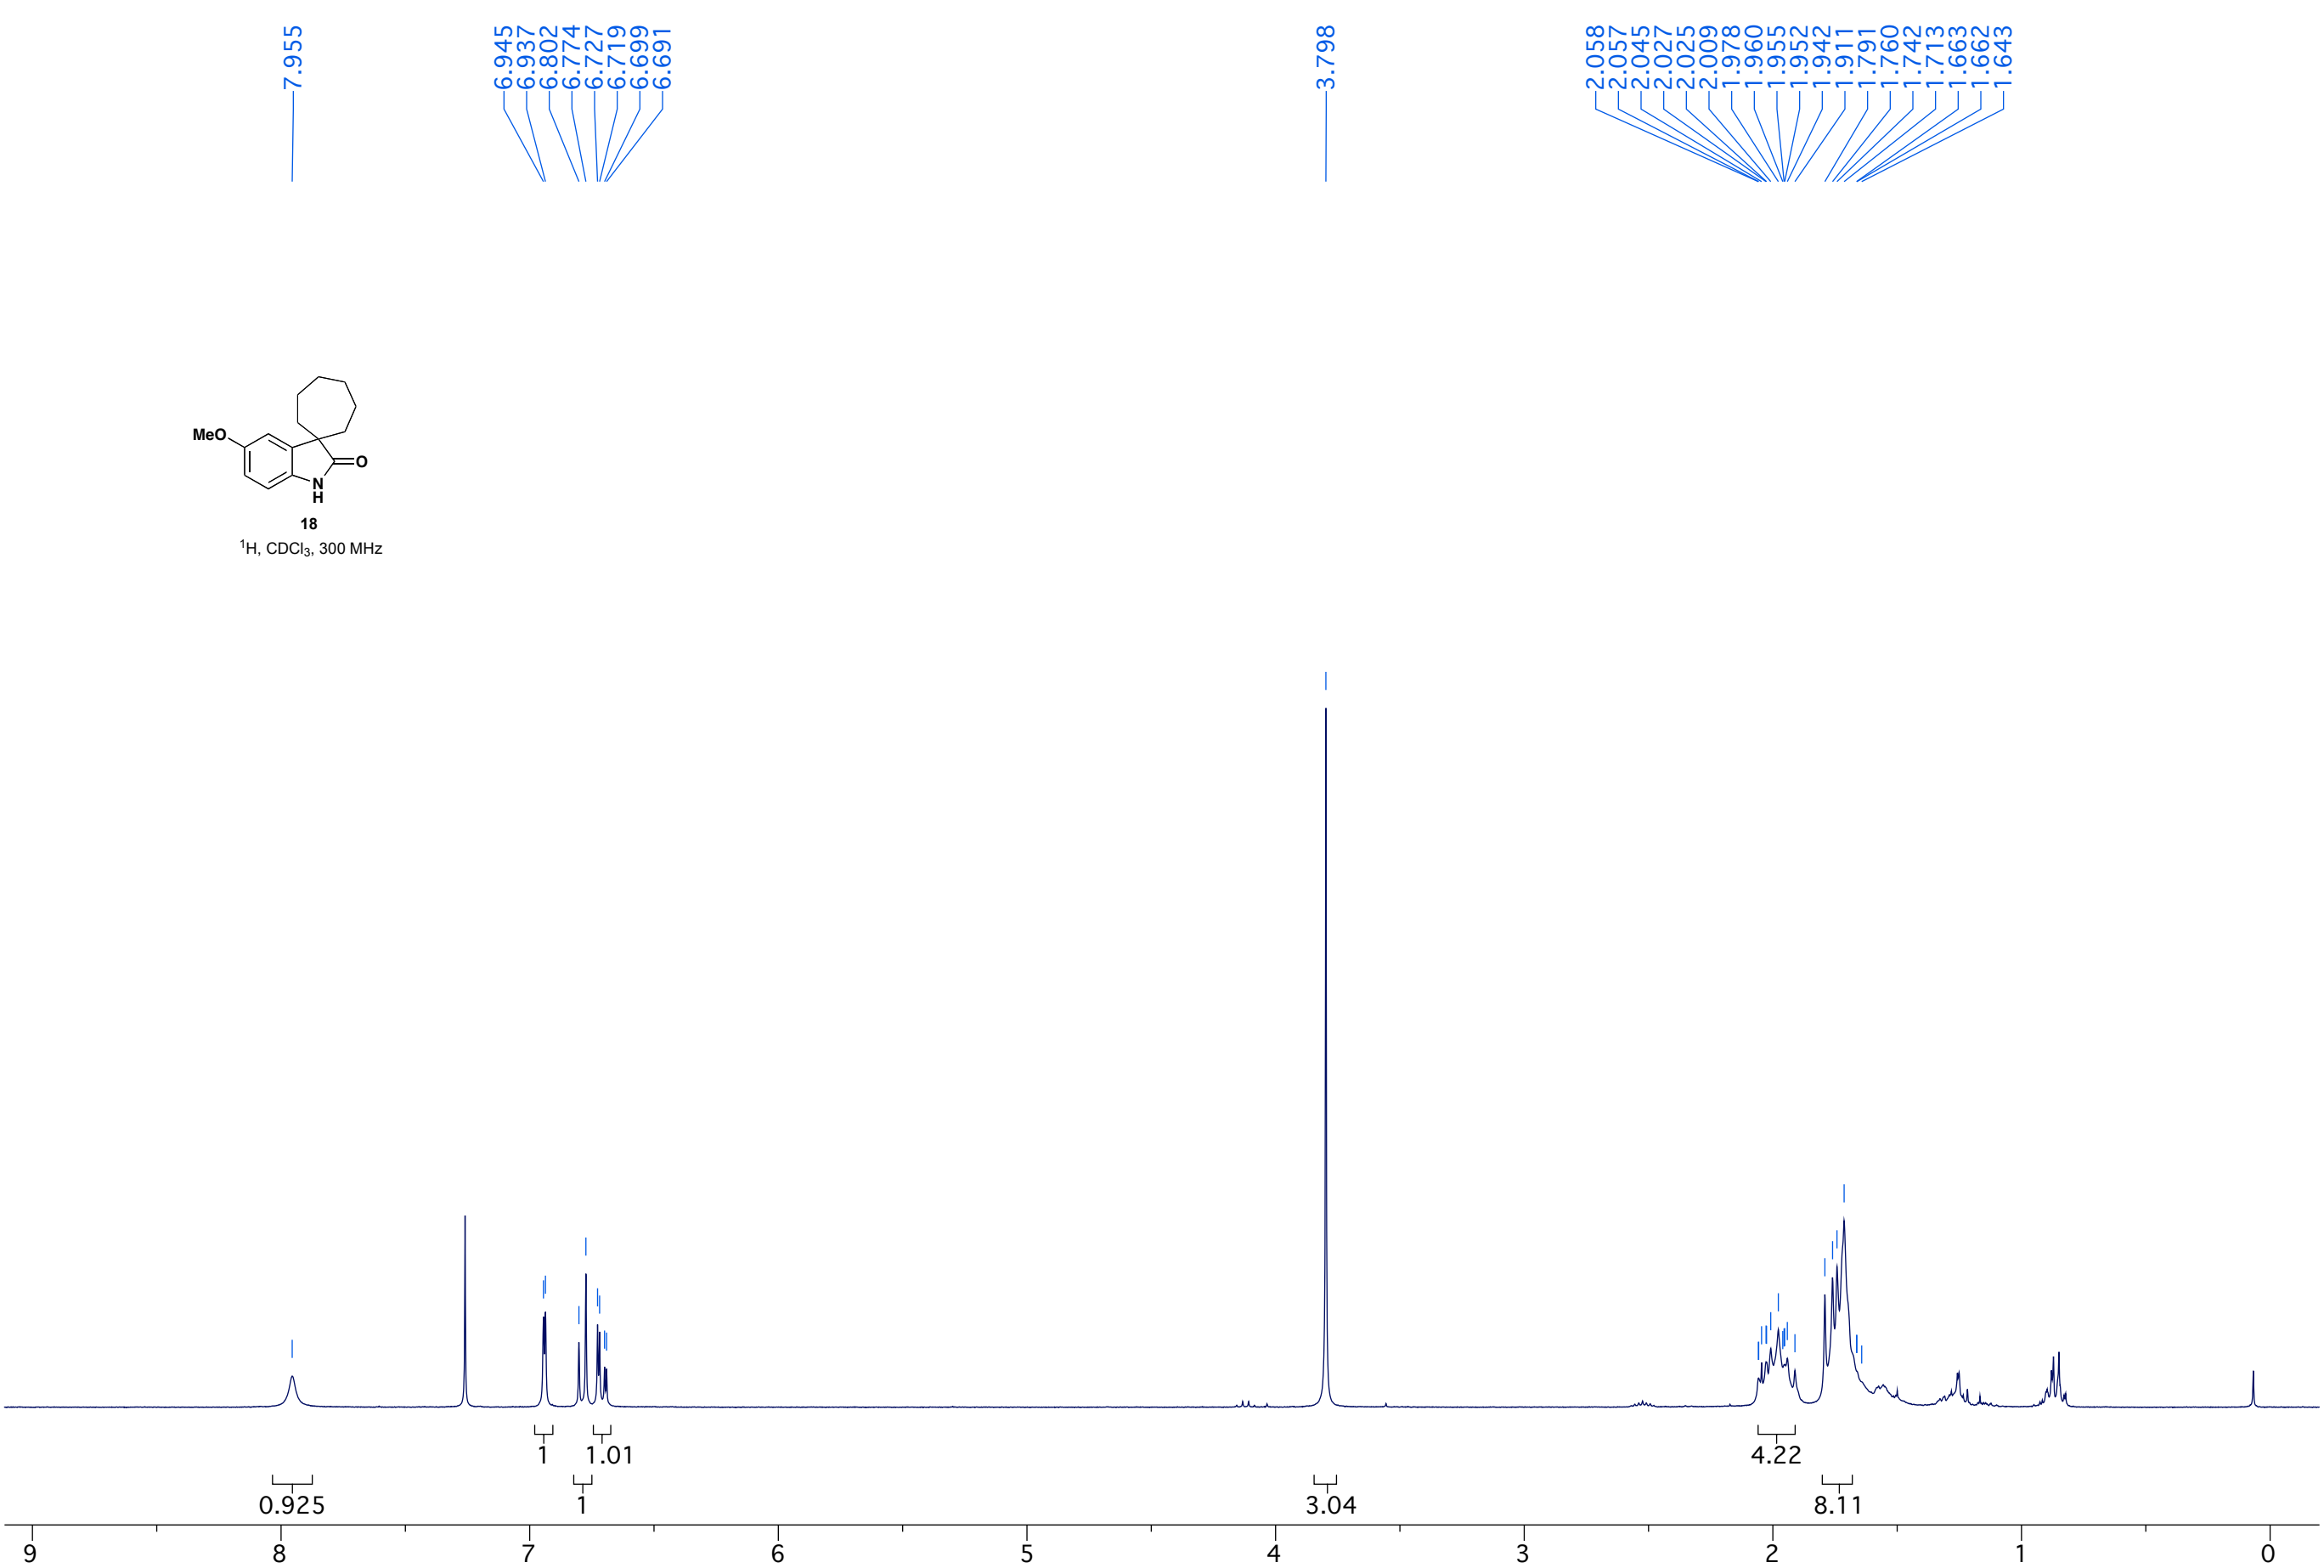



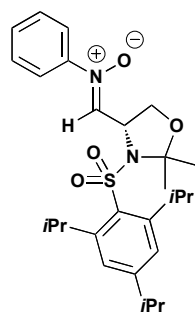

**19**

$^{13}\text{C}$ ,  $\text{CDCl}_3$ , 75 MHz

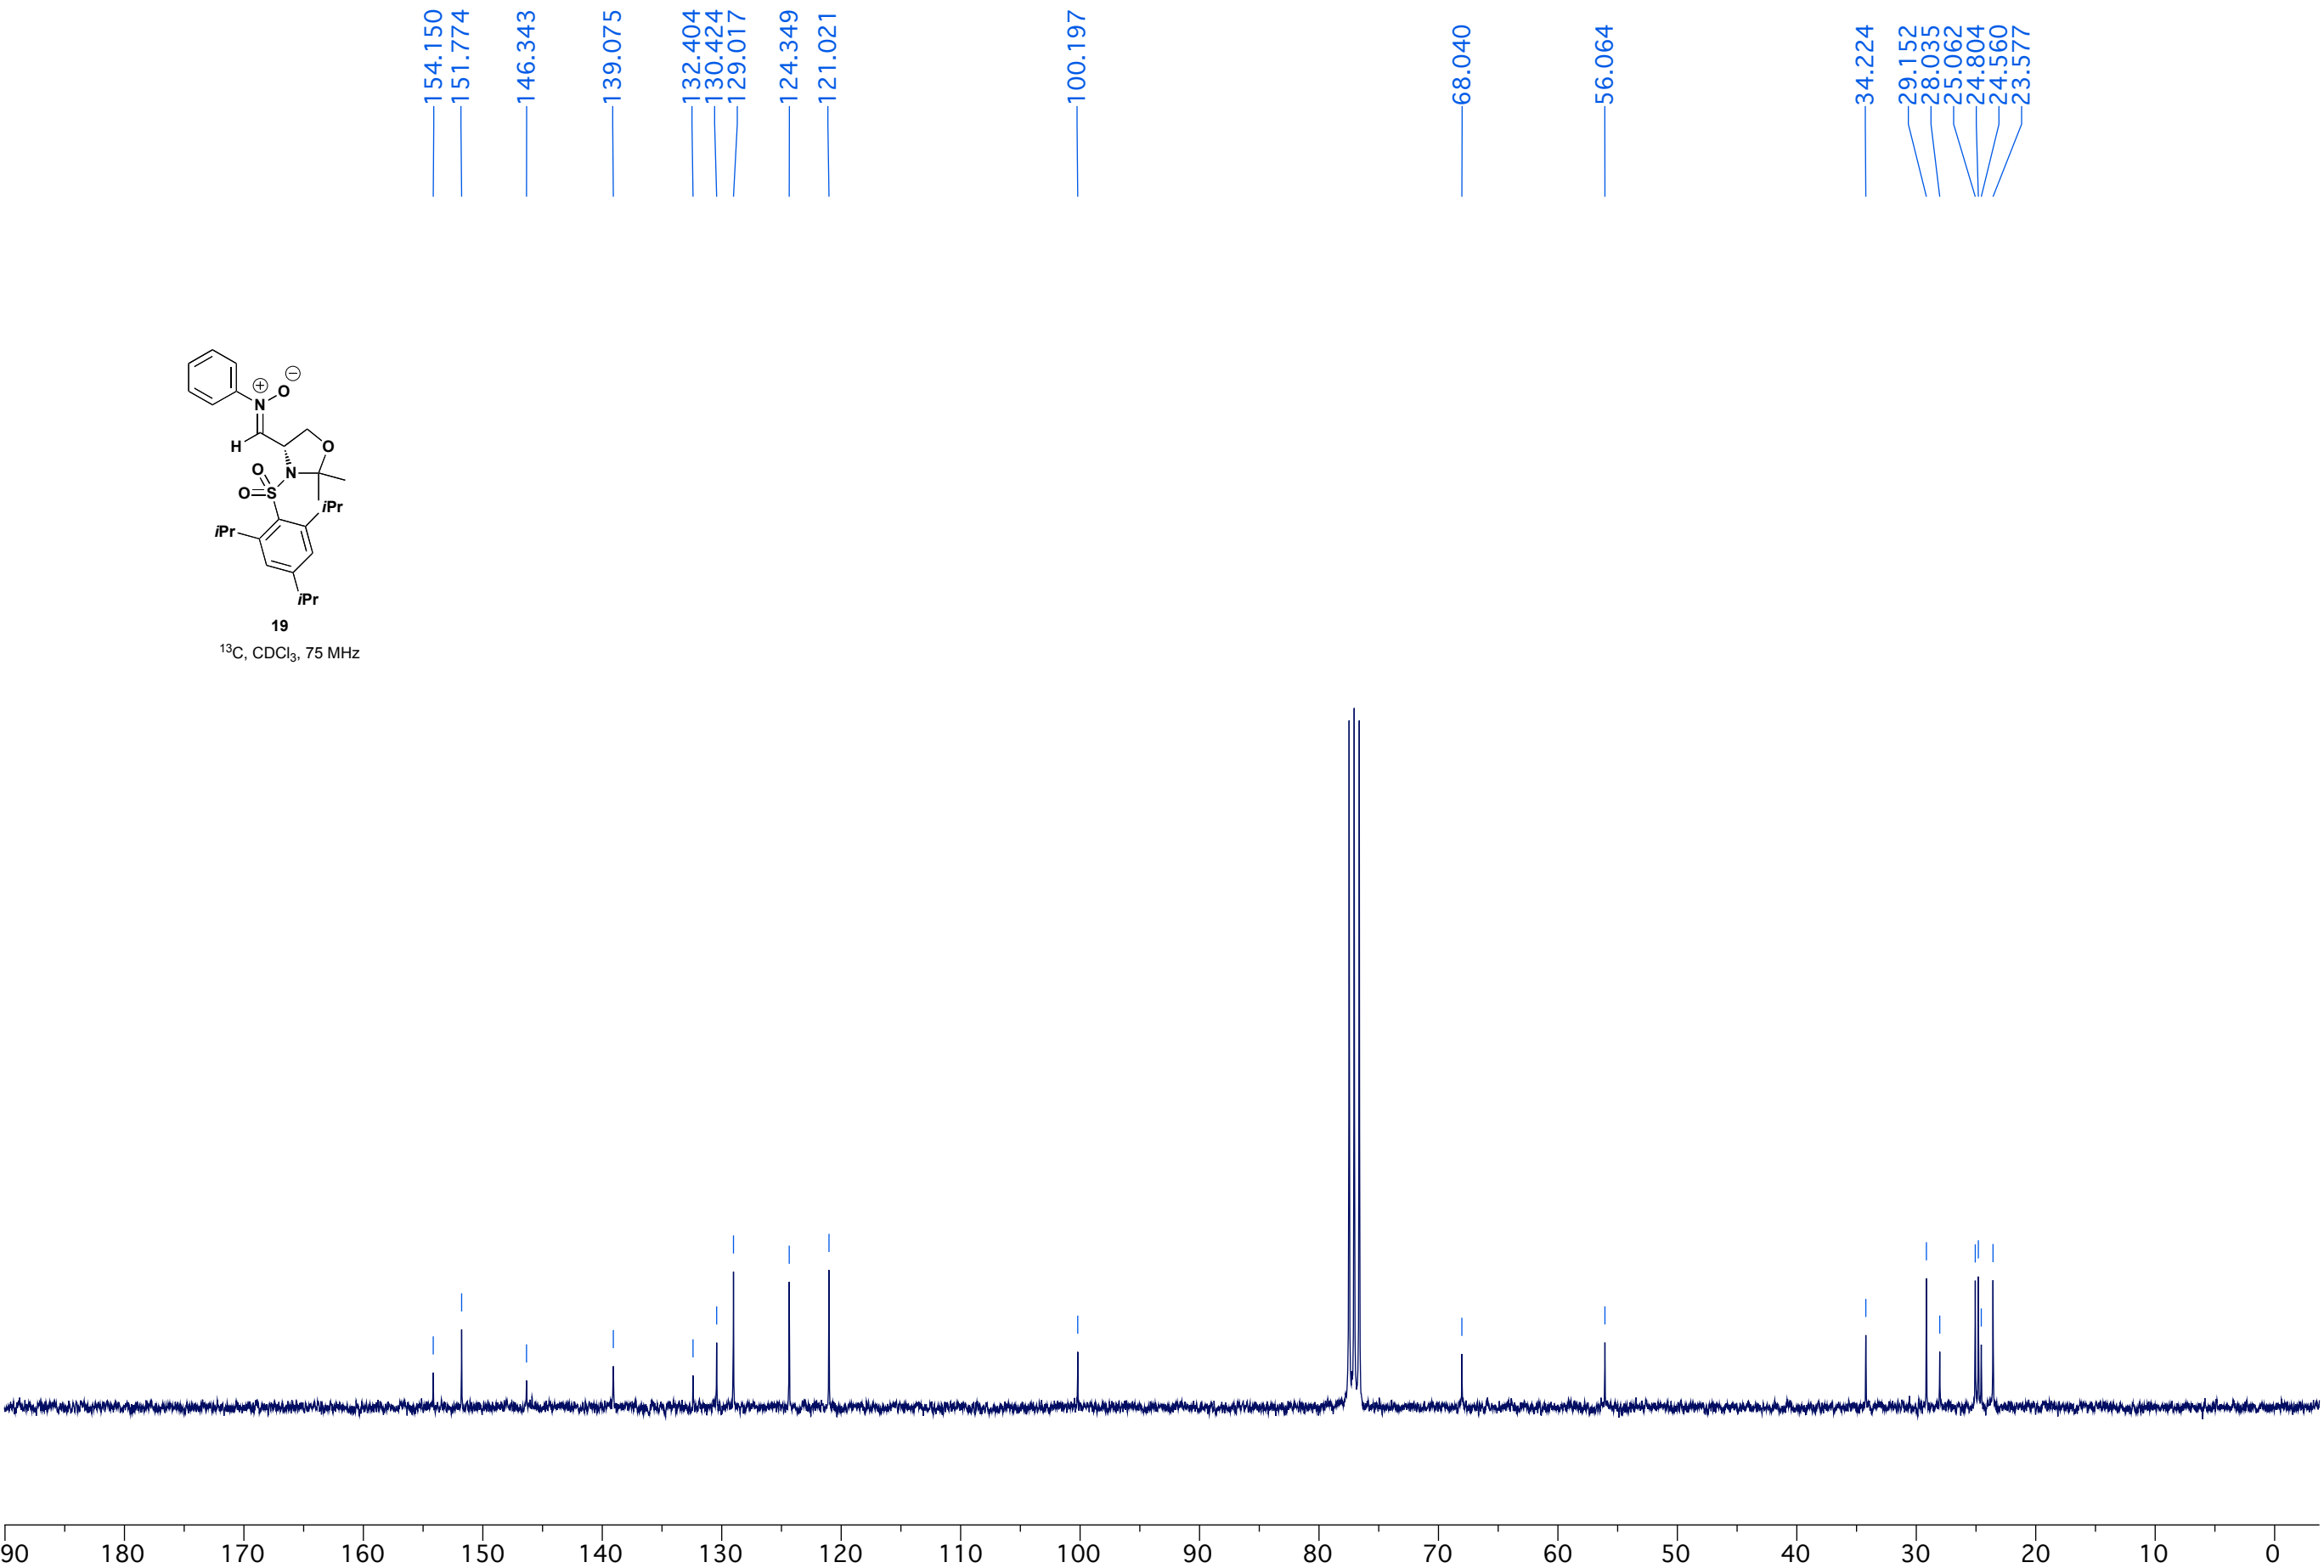

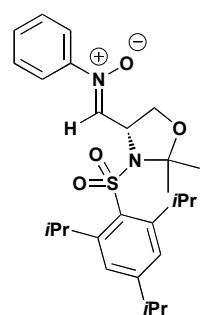

**19**

$^1\text{H}$ ,  $\text{CDCl}_3$ , 300 MHz

7.382  
7.362  
7.357  
7.353  
7.317  
7.290  
7.273  
7.205  
7.060  
7.058  
7.034  
6.763  
6.745

5.310  
5.129  
5.123  
5.112  
5.105  
5.099  
5.088  
5.081  
4.512  
4.488  
4.480  
4.456  
4.419  
4.396  
4.374  
4.351  
4.329  
4.270  
4.263  
4.238  
4.232

2.934  
2.911  
2.888  
2.865  
2.842

1.850  
1.839

1.291  
1.275  
1.269  
1.252  
1.243  
1.238  
1.222  
1.215  
1.199

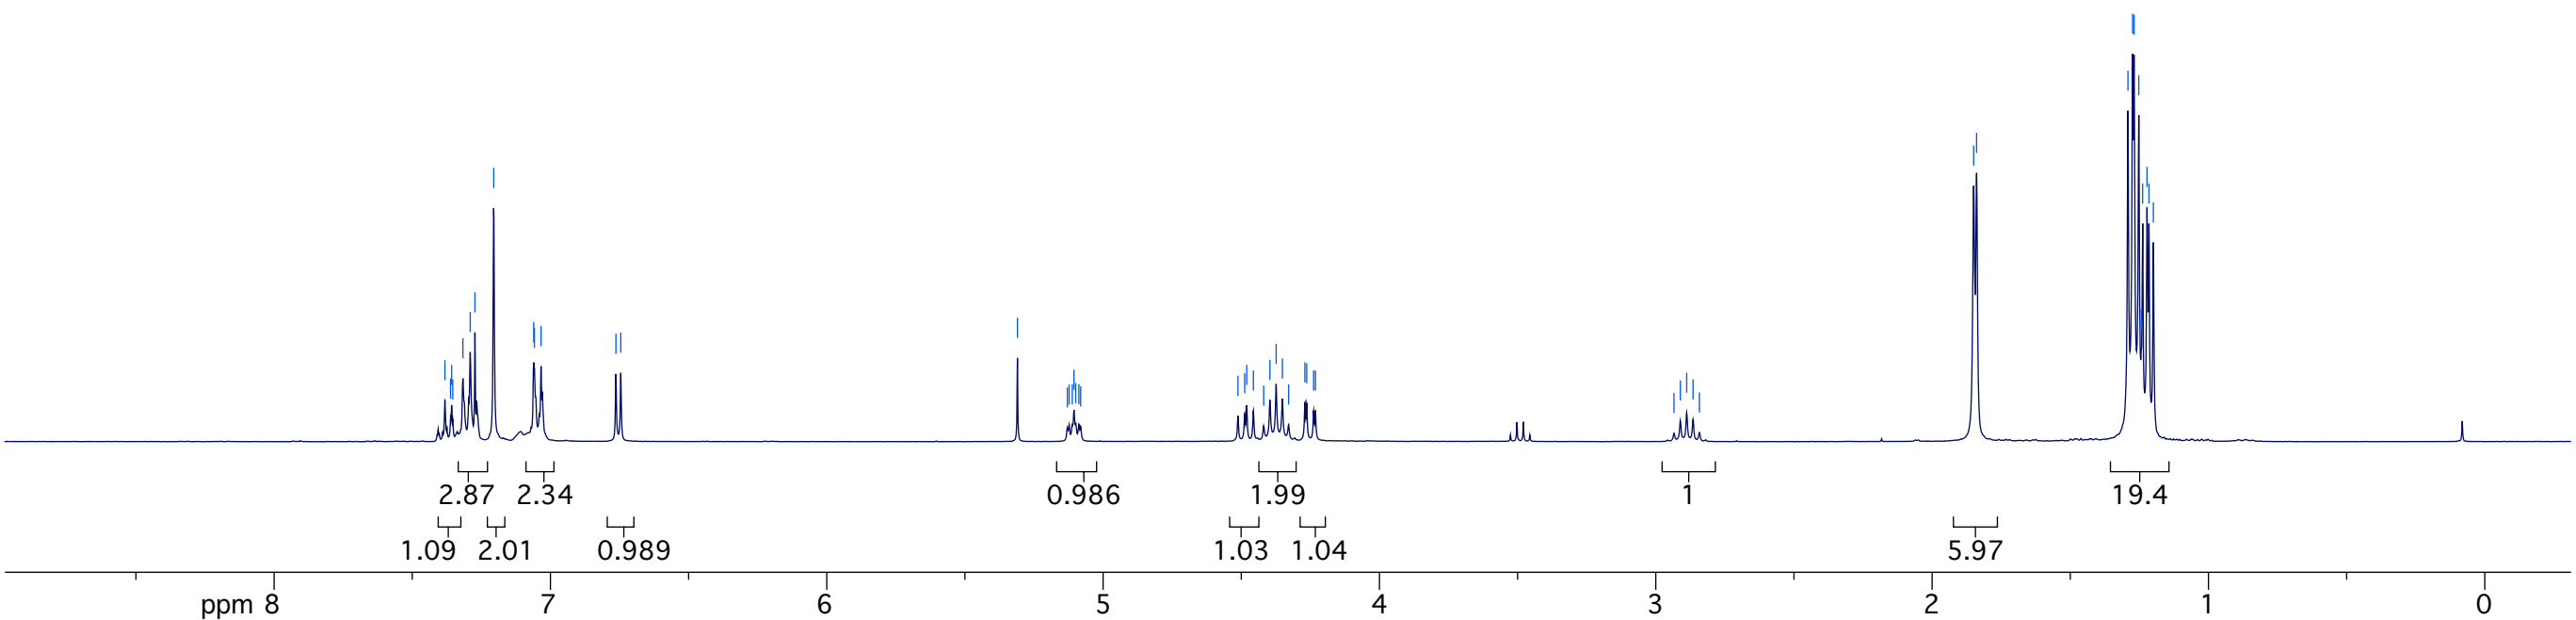

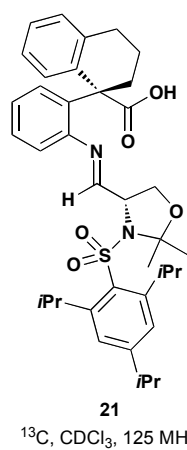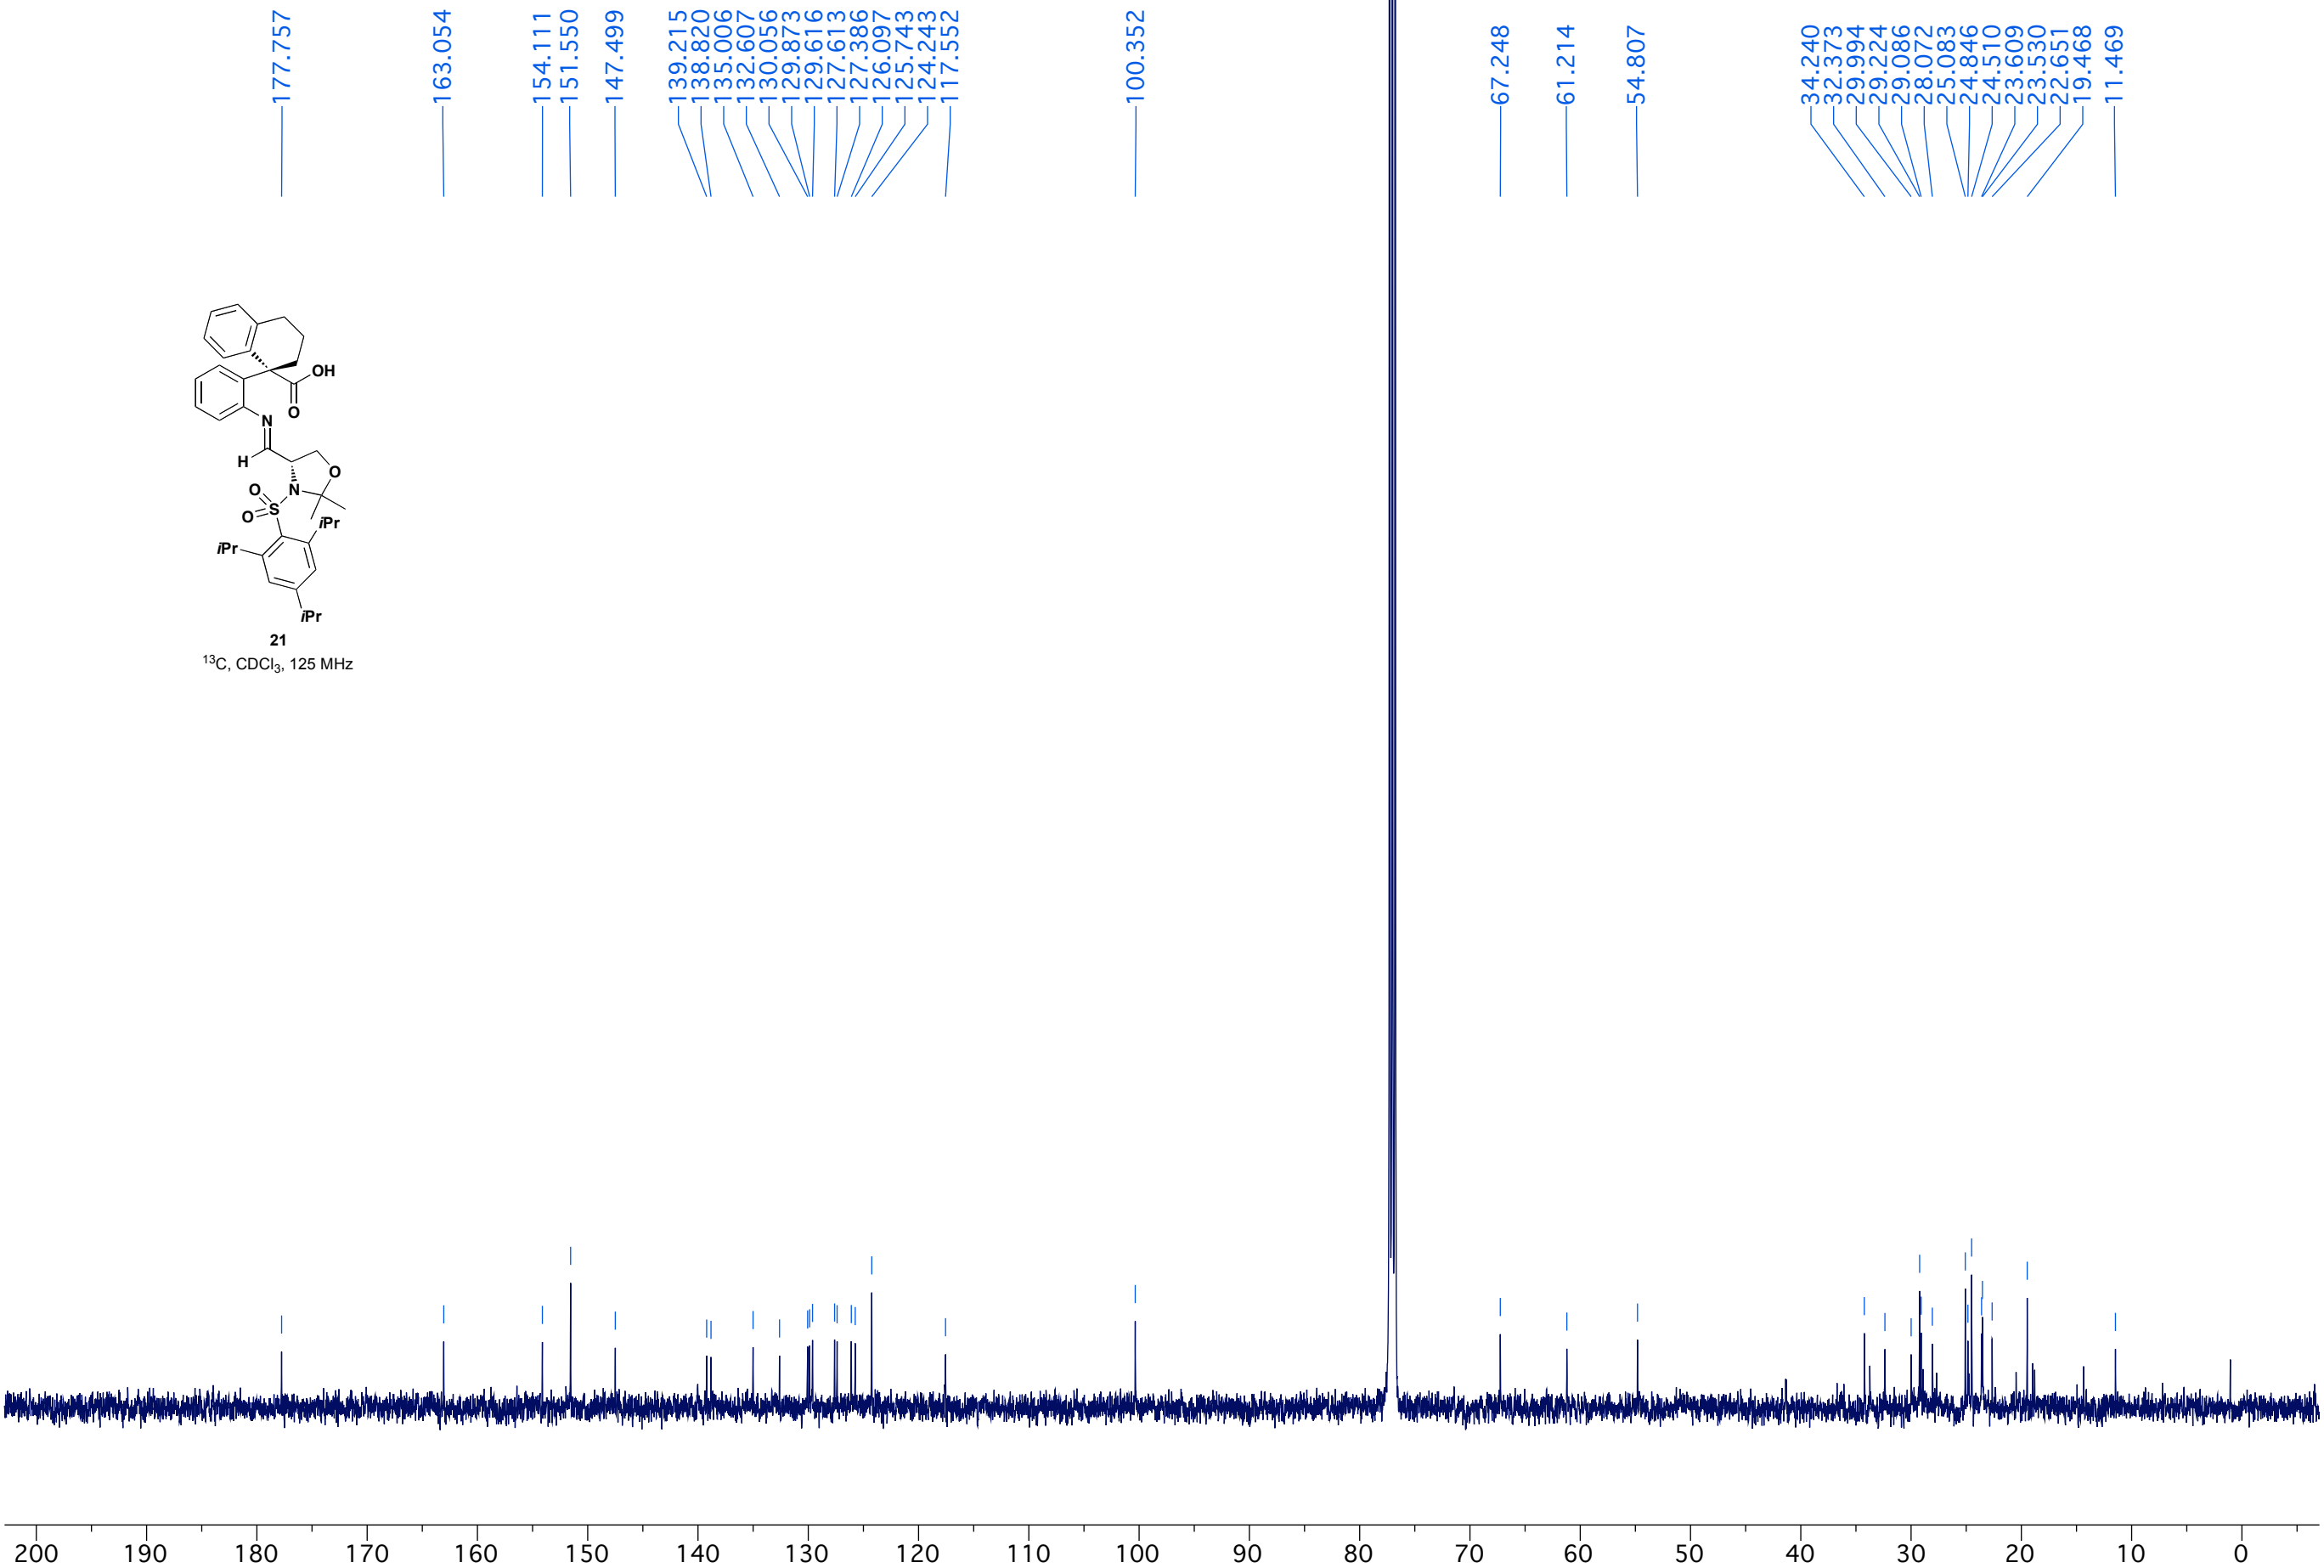

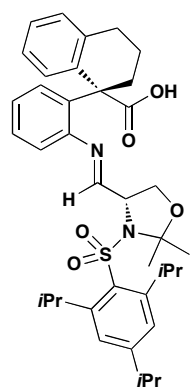

**21**  
<sup>1</sup>H, CDCl<sub>3</sub>, 500 MHz

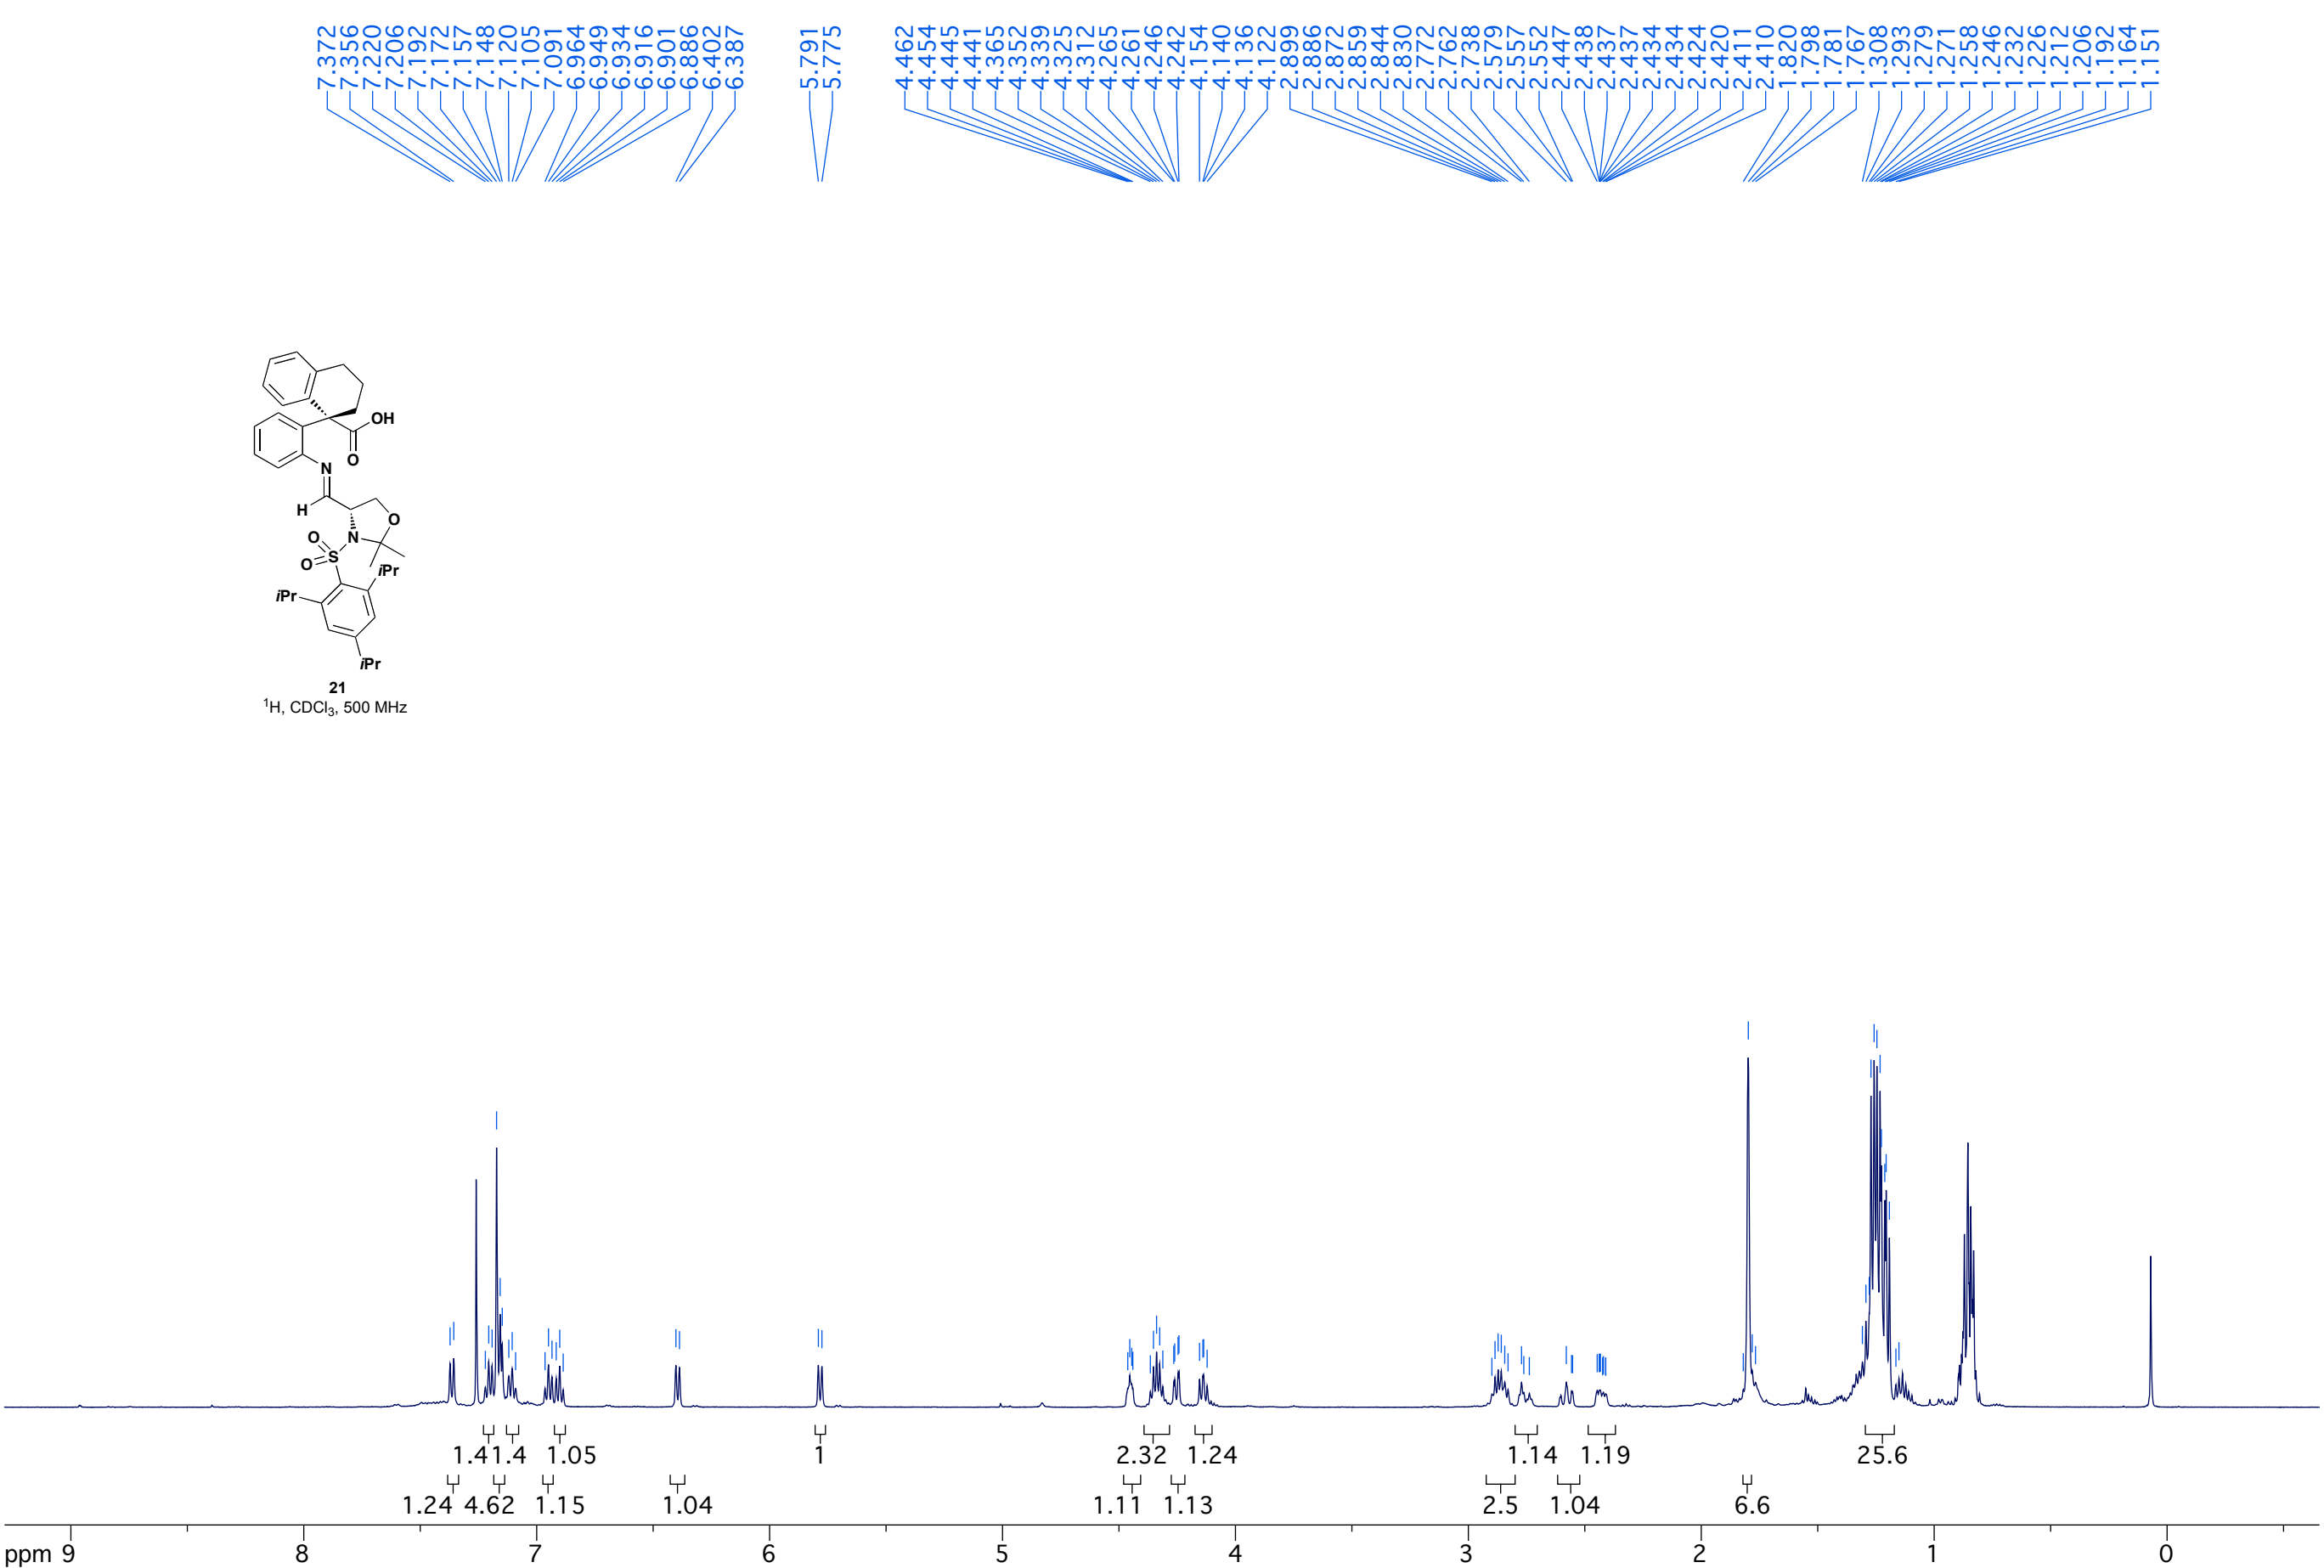

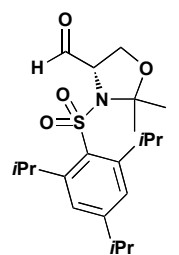

**23**

$^{13}\text{C}$ ,  $\text{CDCl}_3$ , 75 MHz

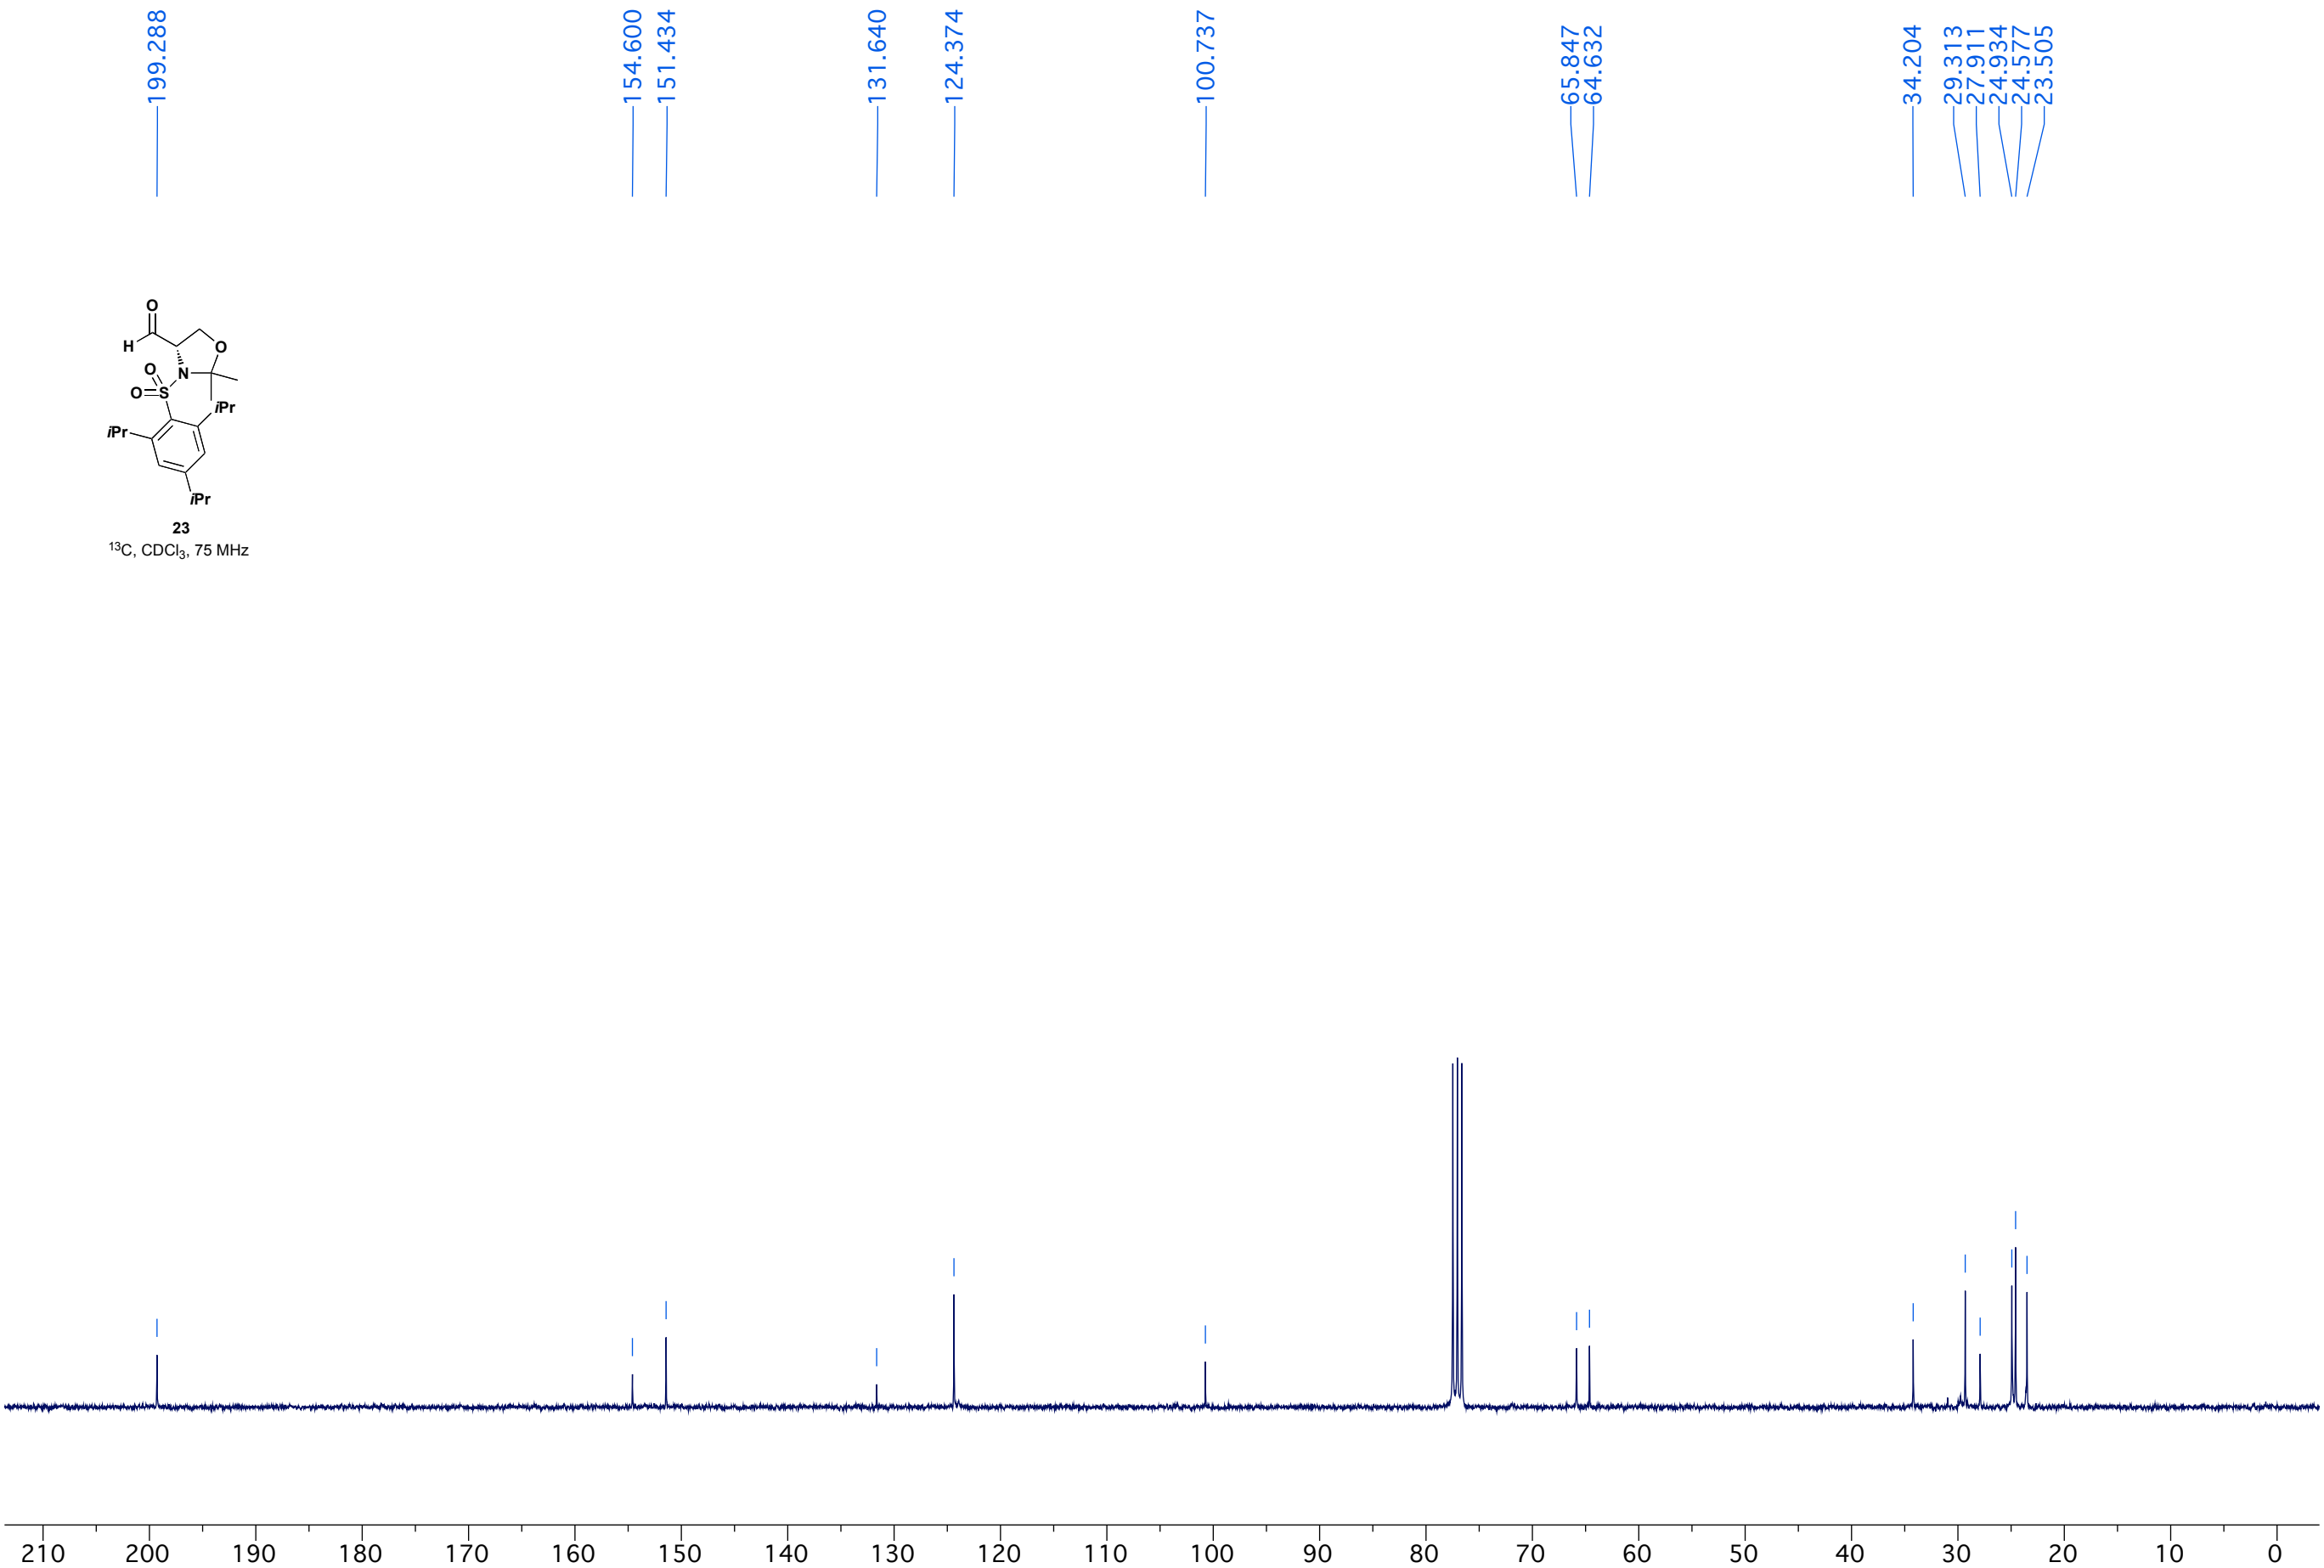

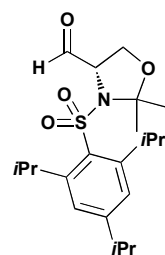

23

$^1\text{H}$ ,  $\text{CDCl}_3$ , 300 MHz

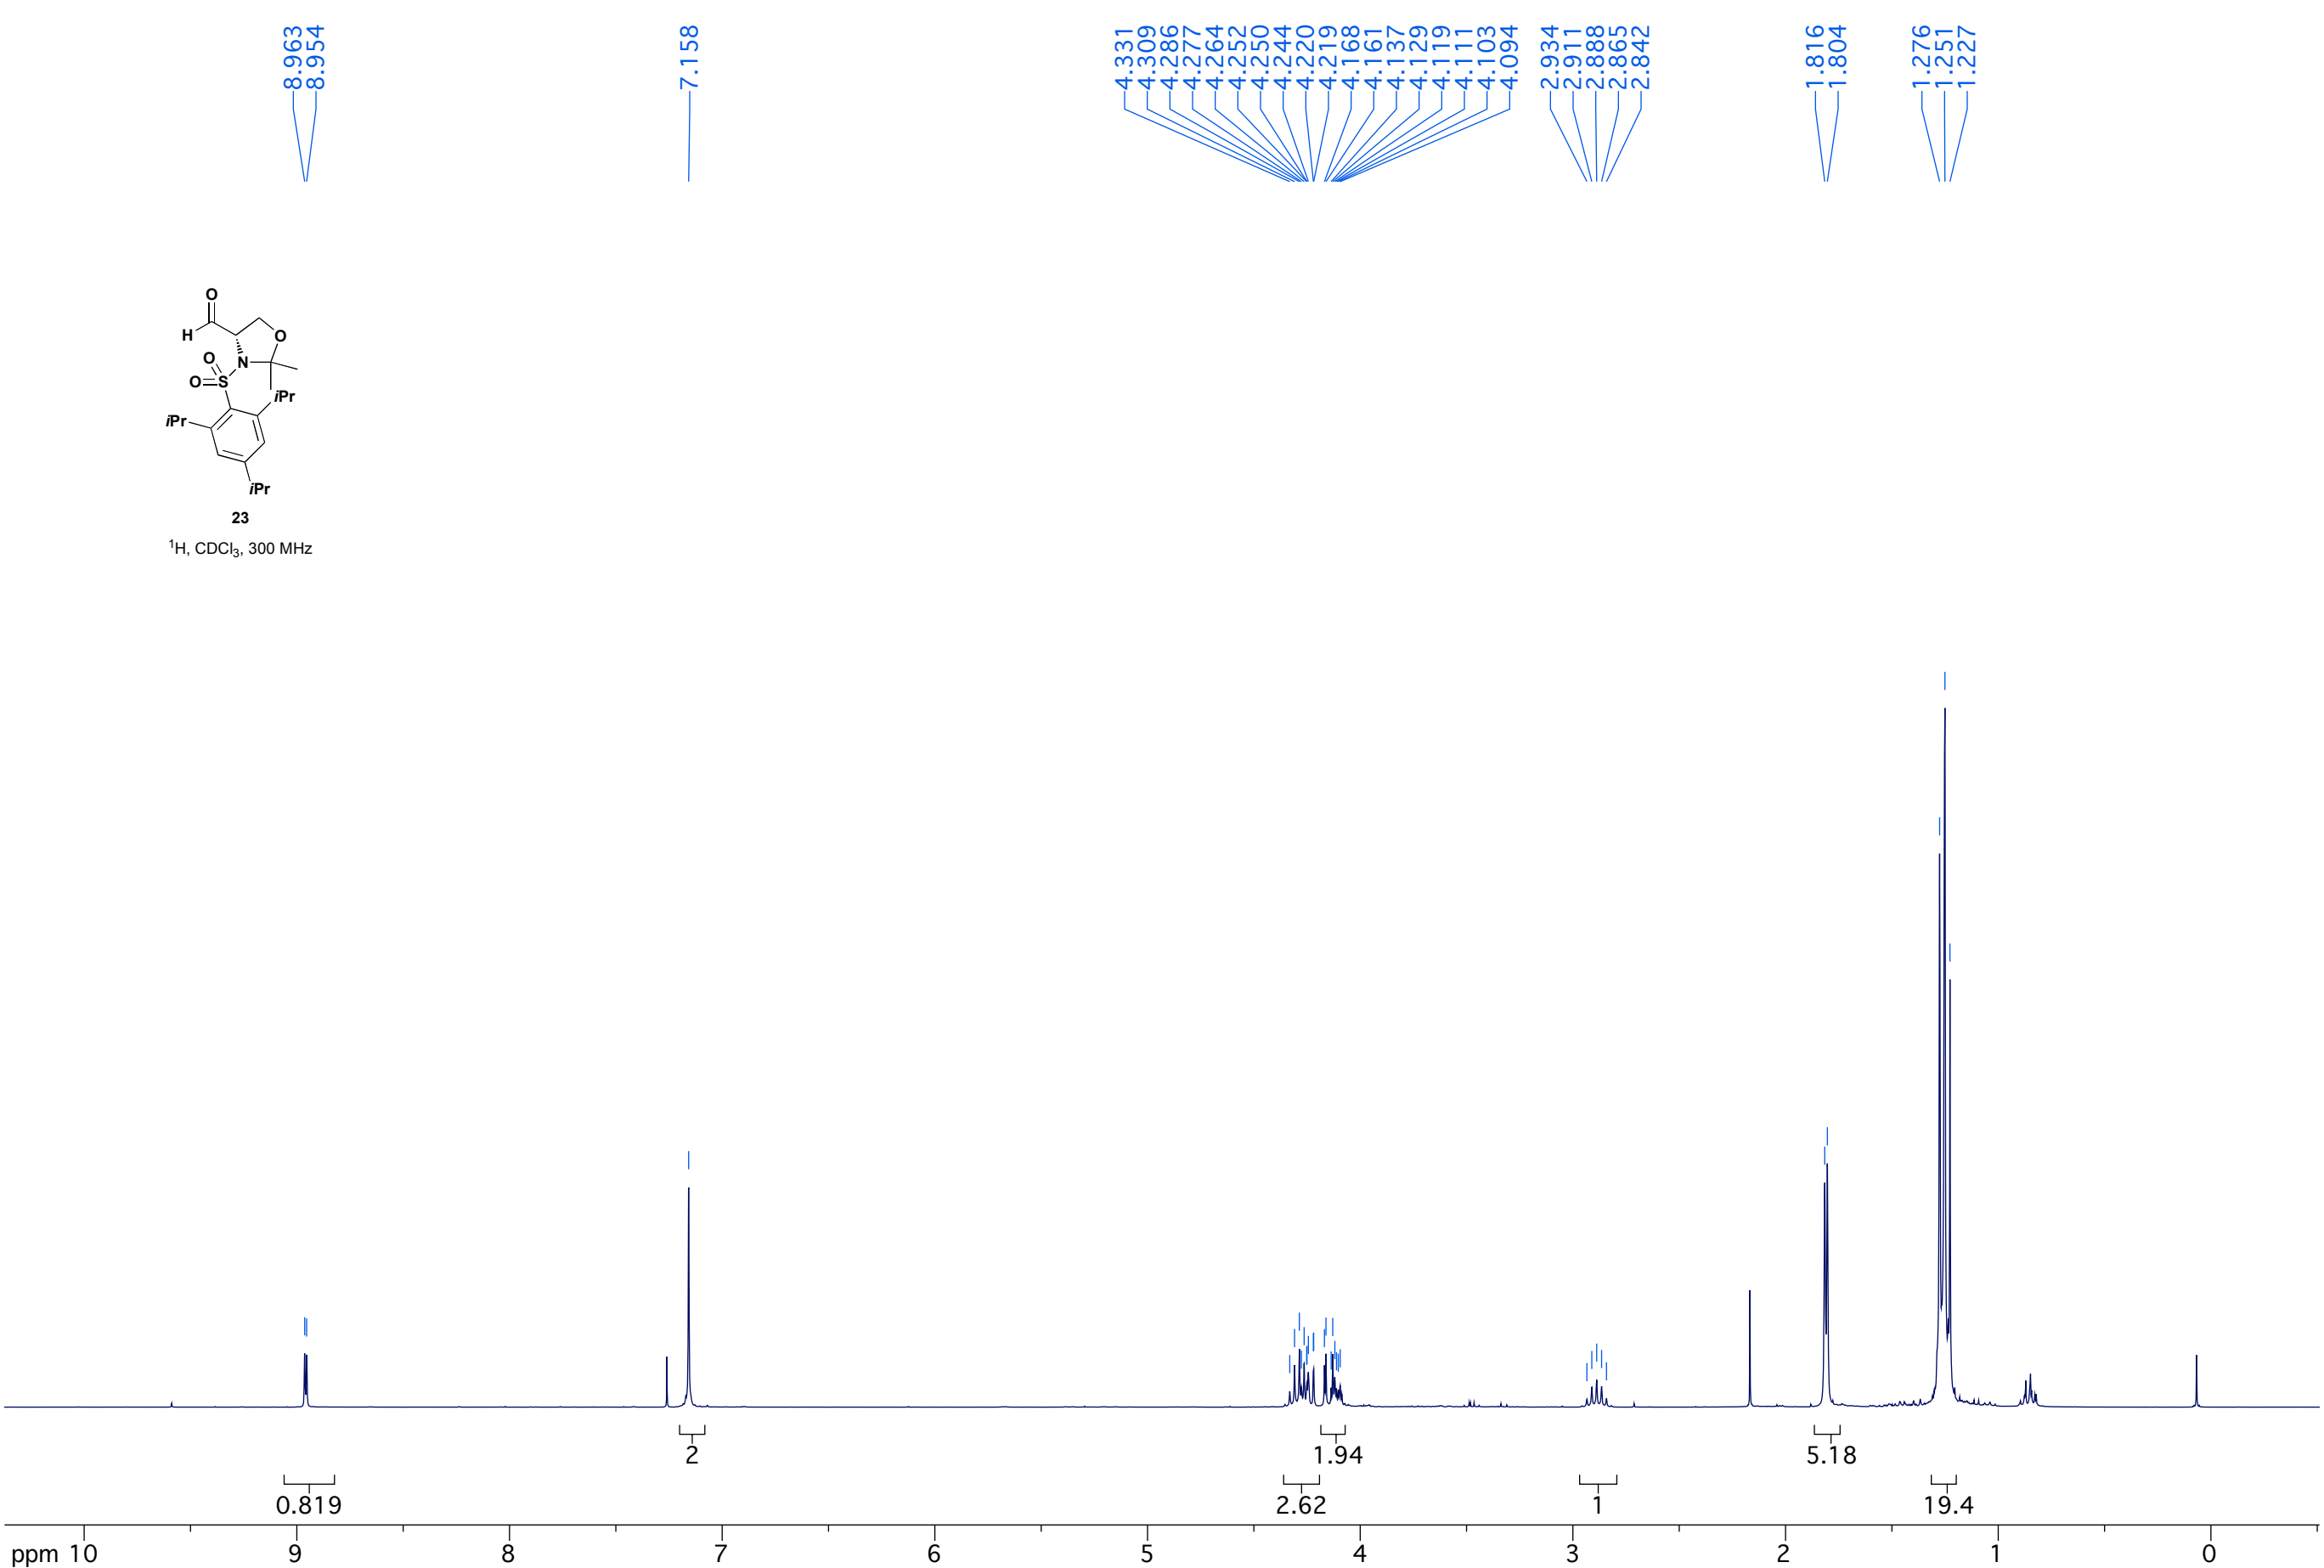

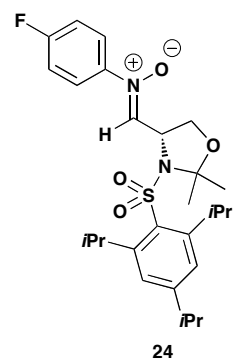

$^{13}\text{C}$ ,  $\text{CDCl}_3$ , 75 MHz

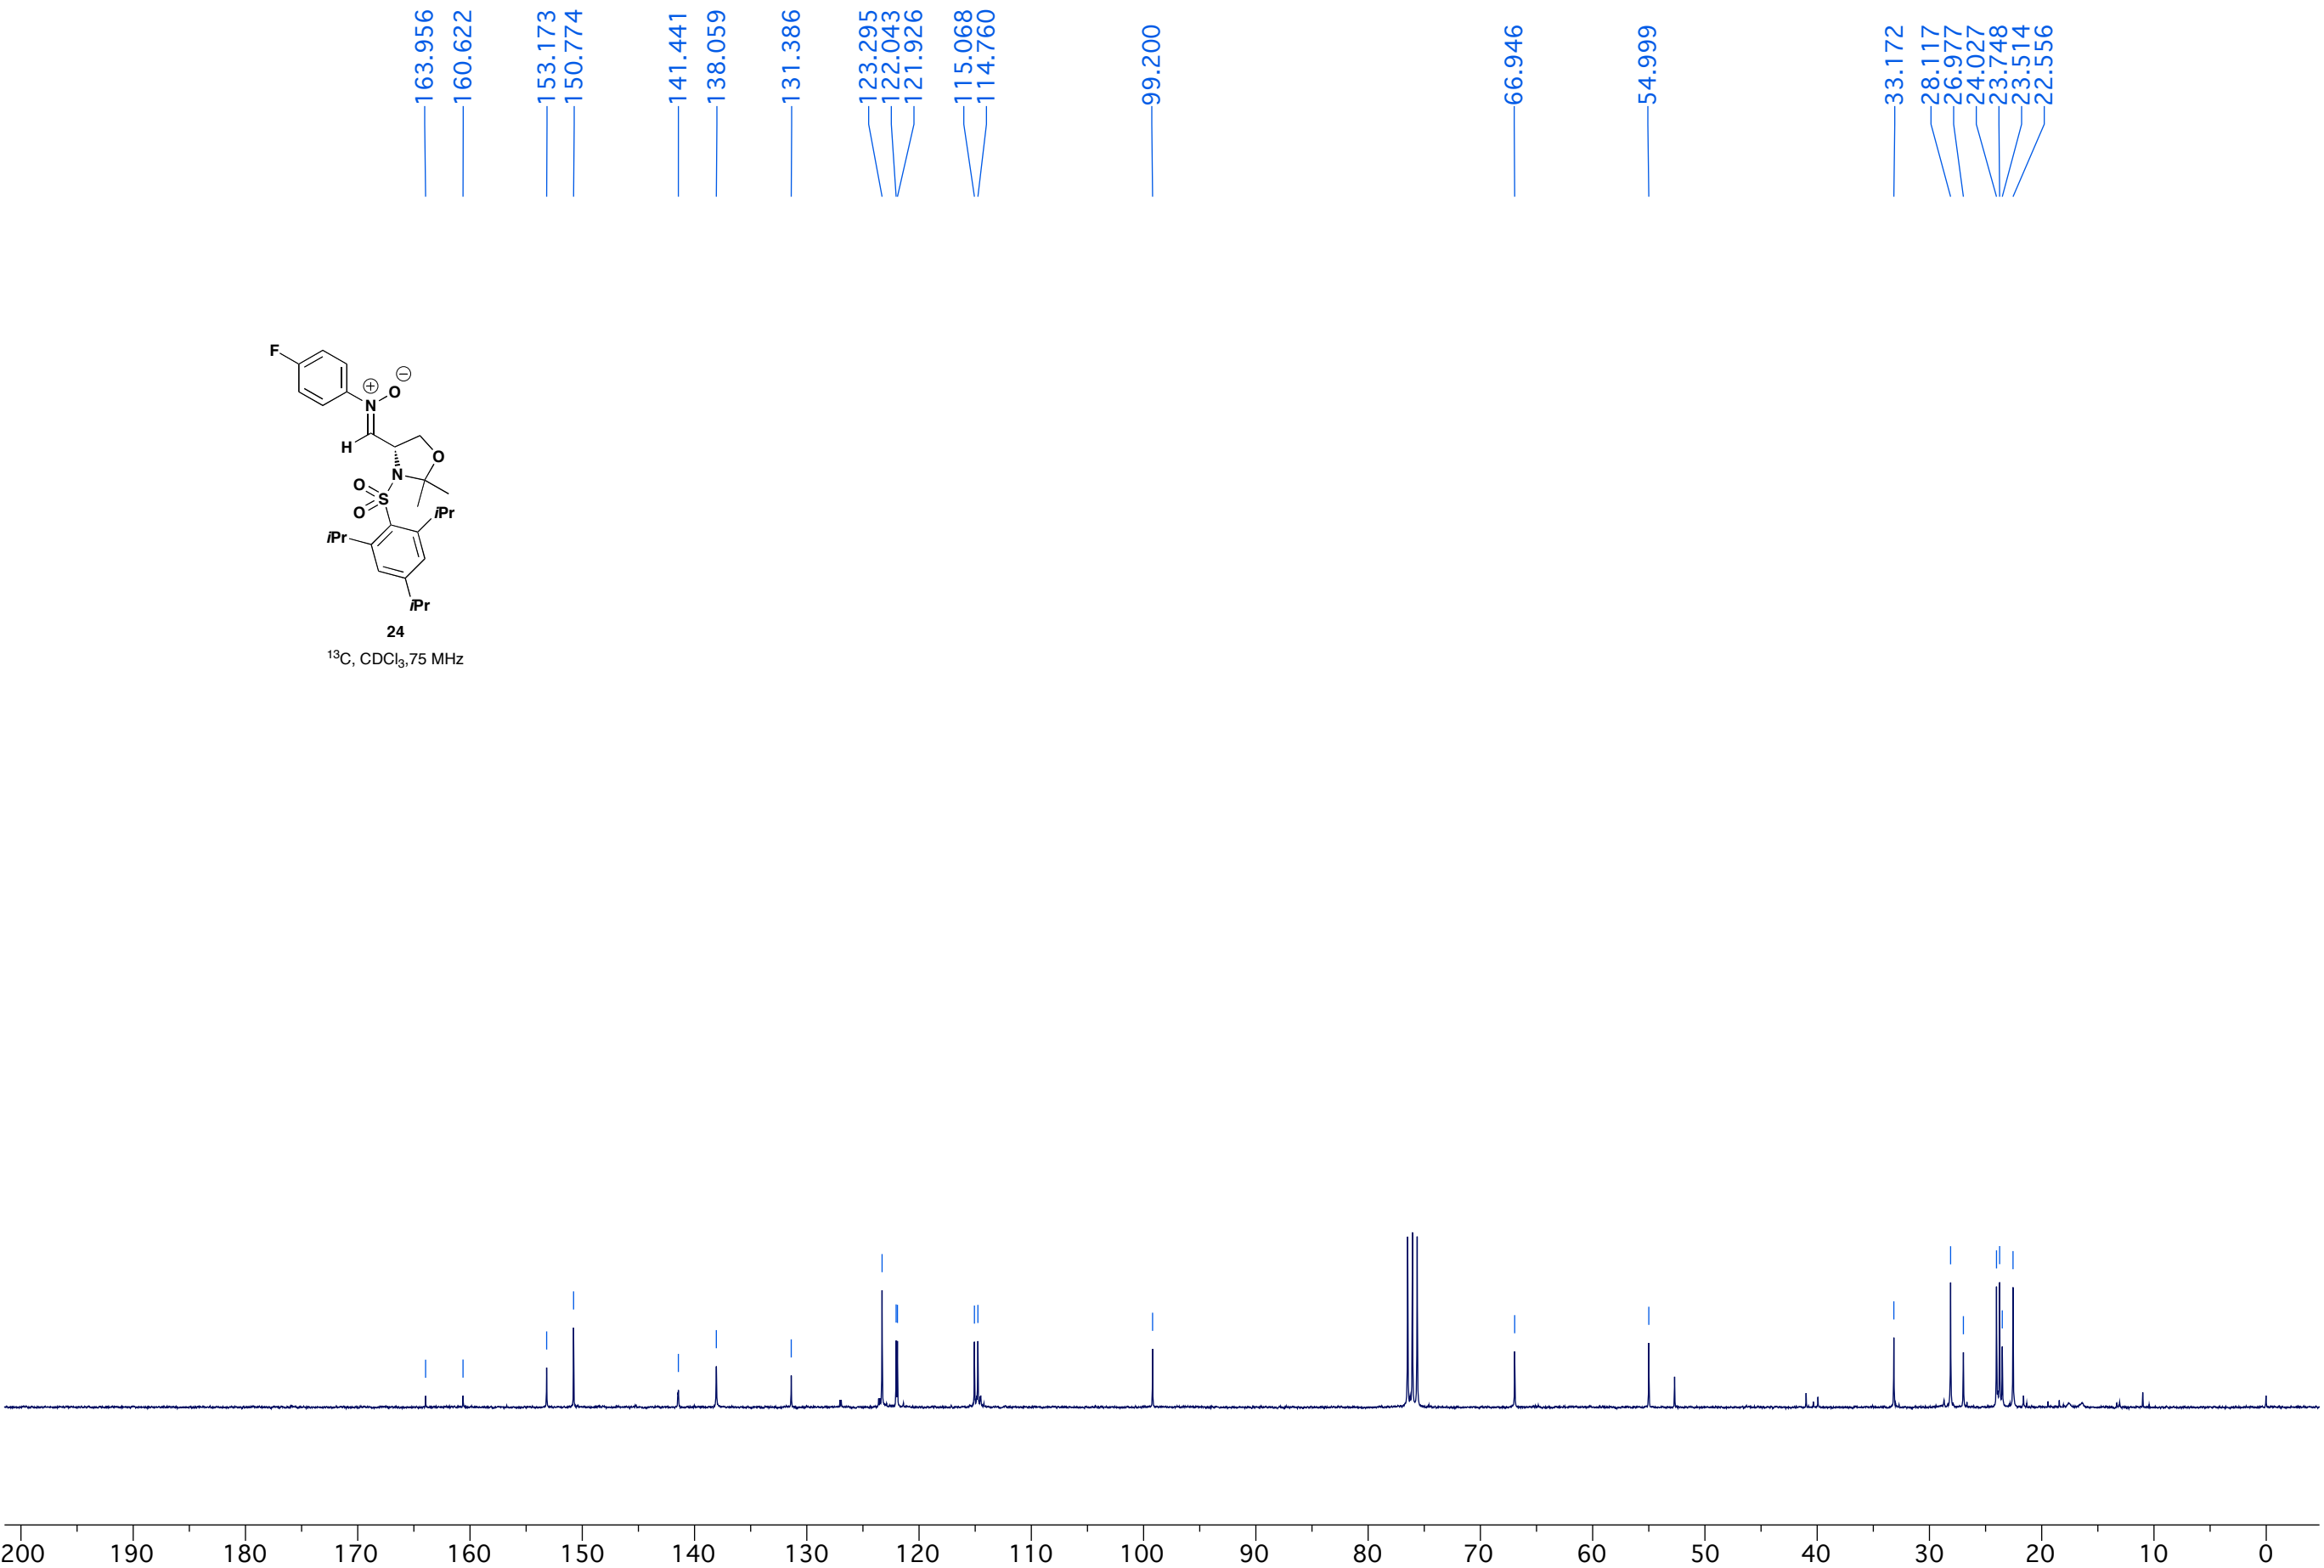

7.202  
7.137  
7.122  
7.112  
7.088  
6.994  
6.986  
6.978  
6.971  
6.964  
6.955  
6.948  
6.938  
6.925  
6.915  
6.907  
6.899  
6.889  
6.885  
6.876  
6.866  
6.859  
6.854  
6.843  
6.825

5.026  
5.019  
5.007  
5.002  
4.996  
4.984  
4.978  
4.416  
4.392  
4.384  
4.360  
4.323  
4.301  
4.278  
4.256  
4.233  
4.165  
4.159  
4.133  
4.127

2.859  
2.836  
2.813  
2.790  
2.767

1.763  
1.747

1.203  
1.184  
1.181  
1.161  
1.146  
1.138  
1.132  
1.123

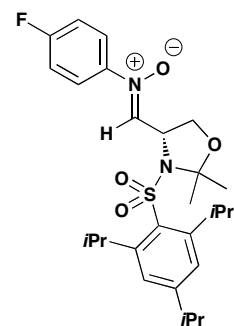

24

<sup>1</sup>H, CDCl<sub>3</sub>, 300 MHz

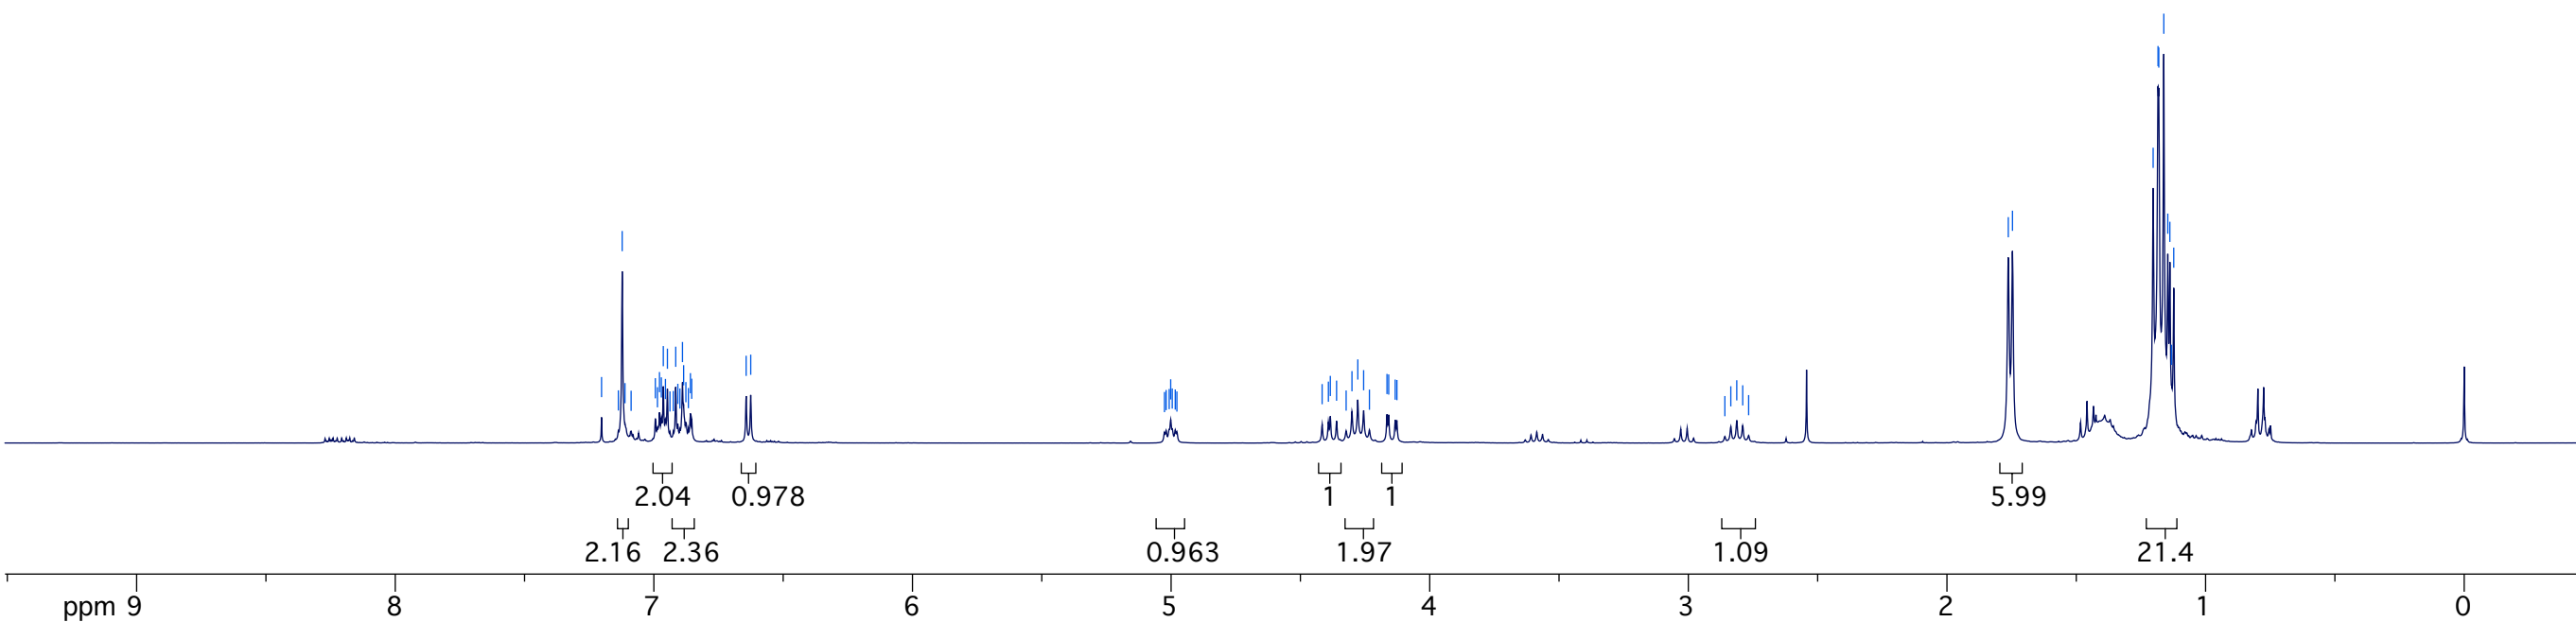



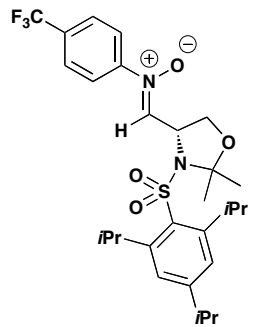

**25**

$^{13}\text{C}$ ,  $\text{CDCl}_3$ , 100 MHz

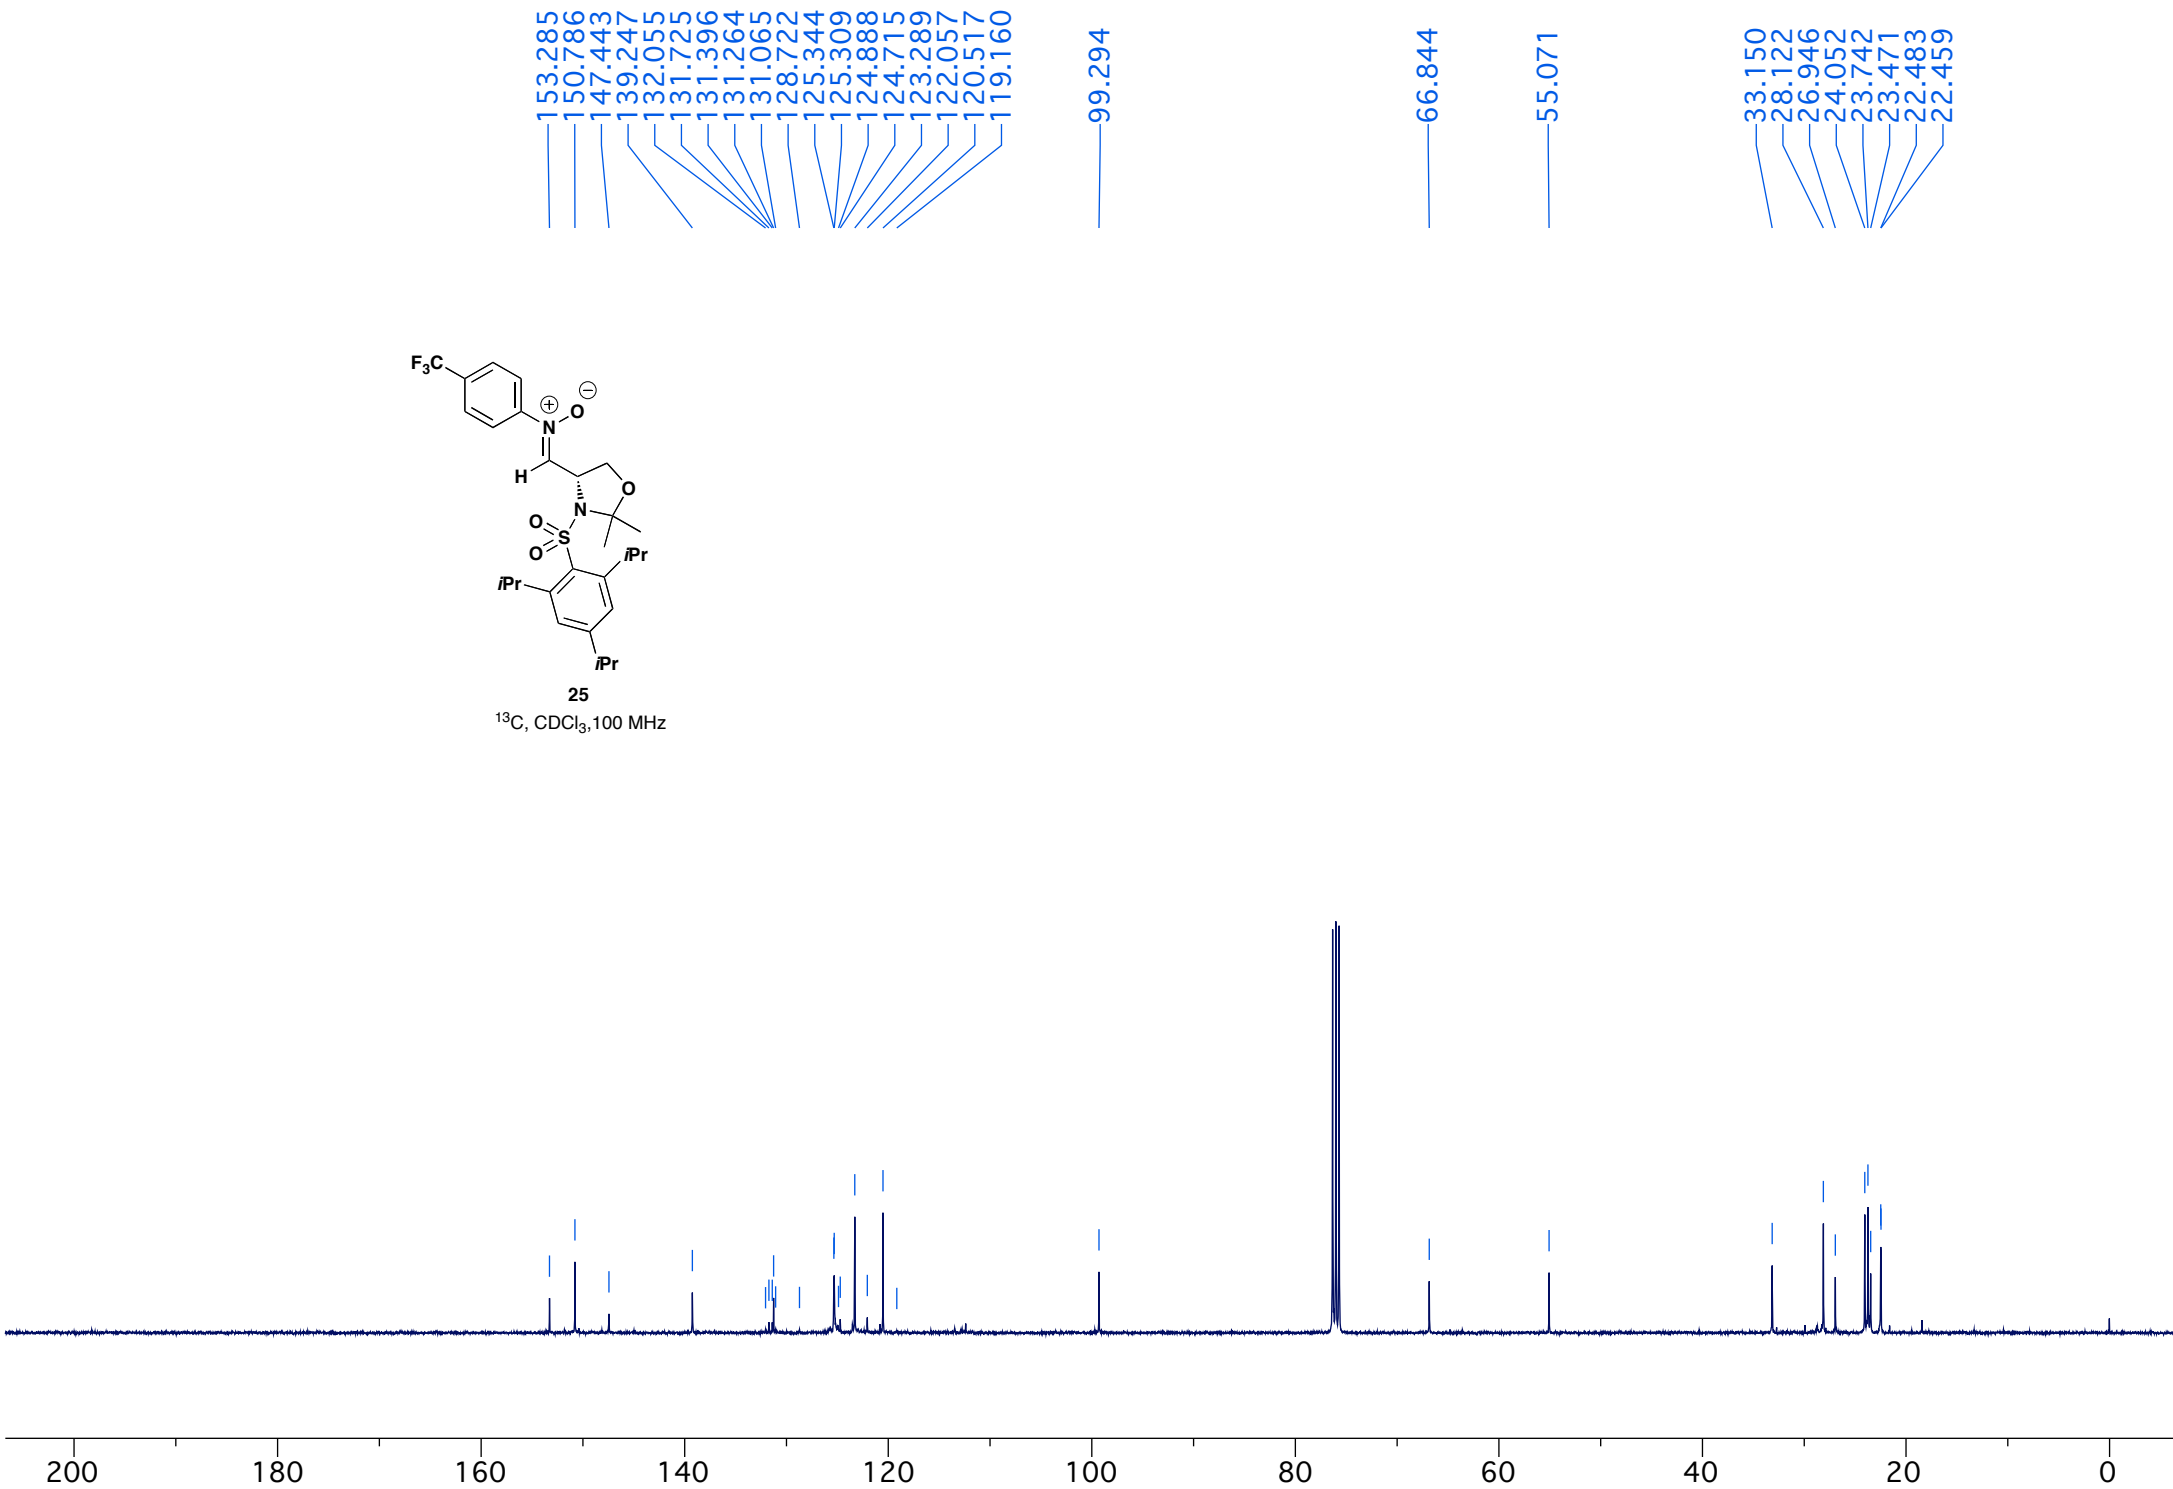

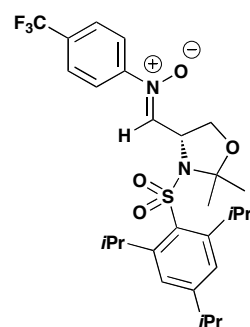

25

$^1\text{H}$ ,  $\text{CDCl}_3$ , 400 MHz

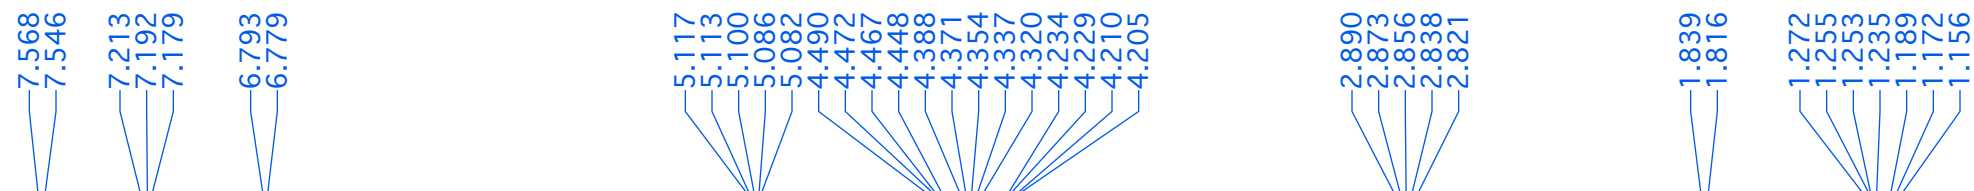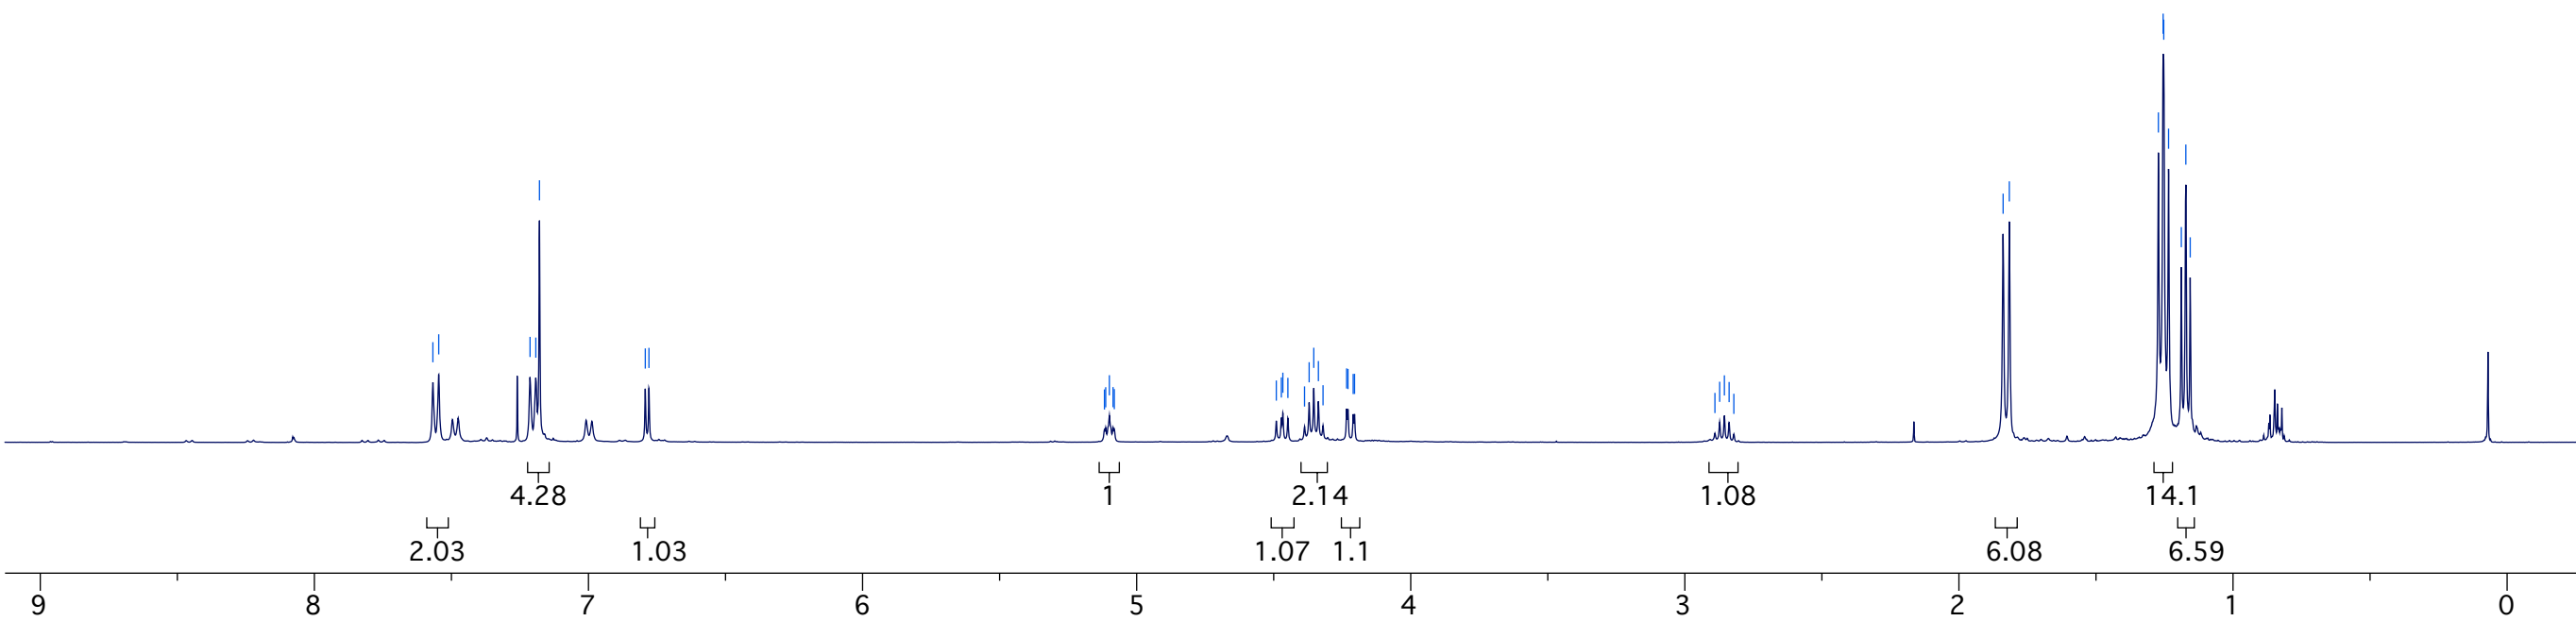

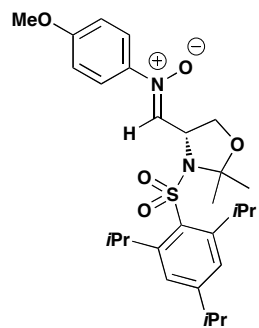

26

$^{13}\text{C}$ ,  $\text{CDCl}_3$ , 125 MHz

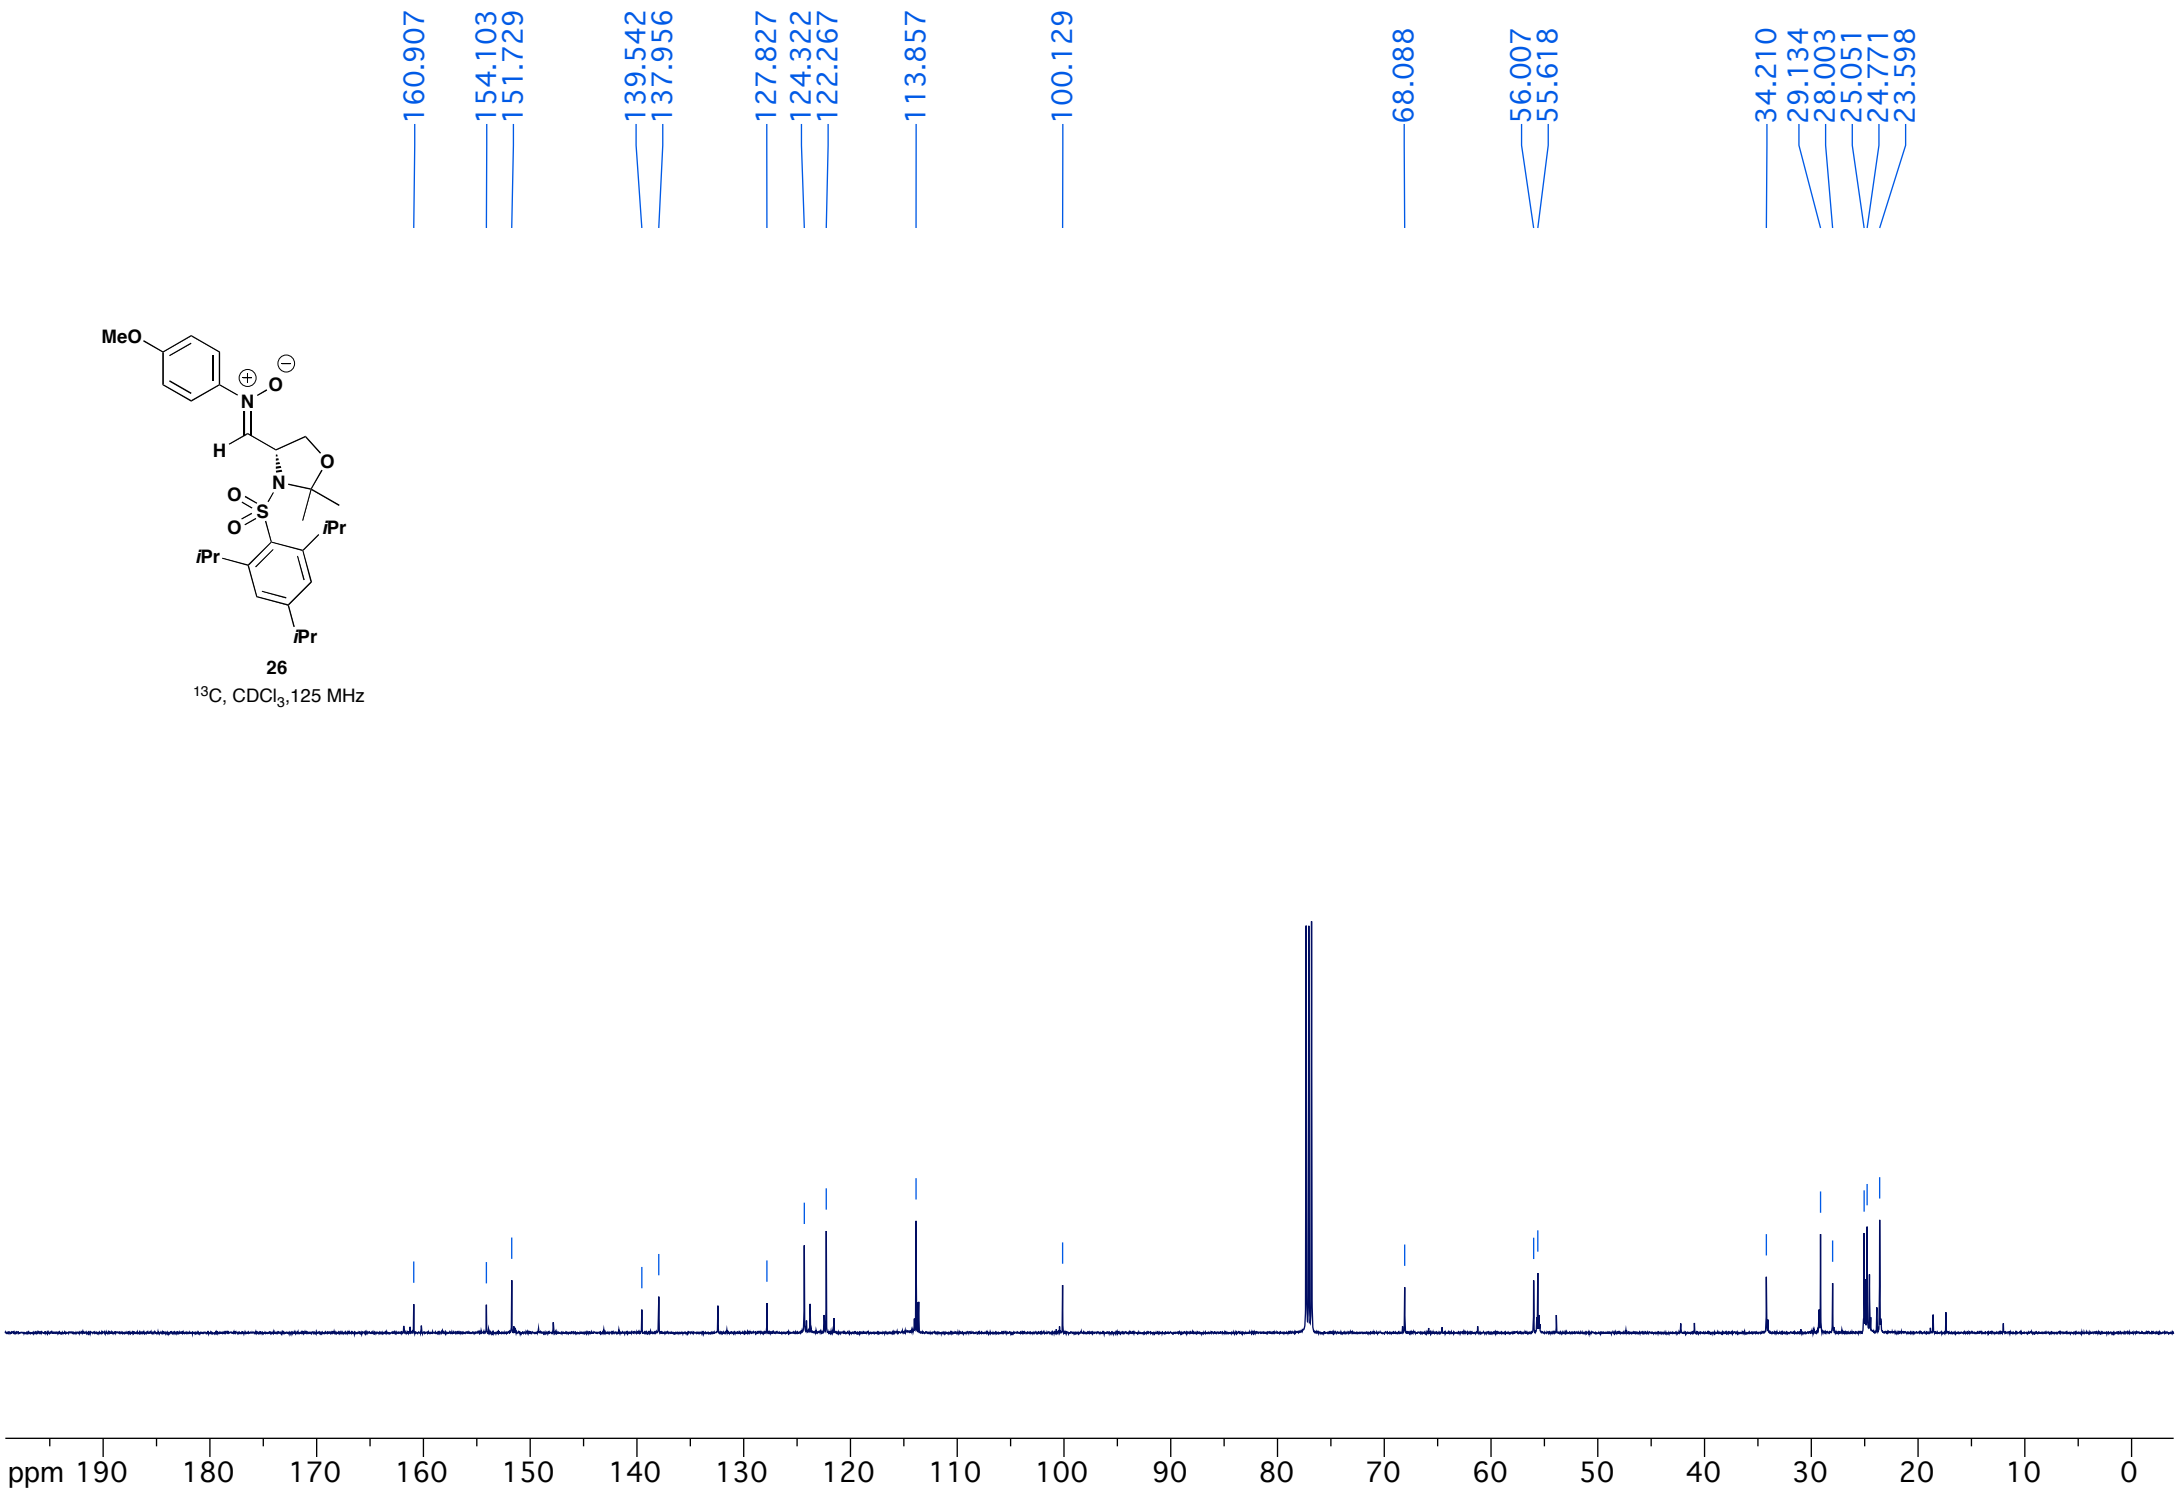

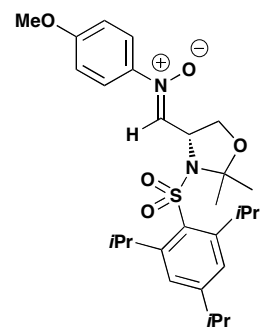

**26**  
 $^1\text{H}$ ,  $\text{CDCl}_3$ , 500 MHz

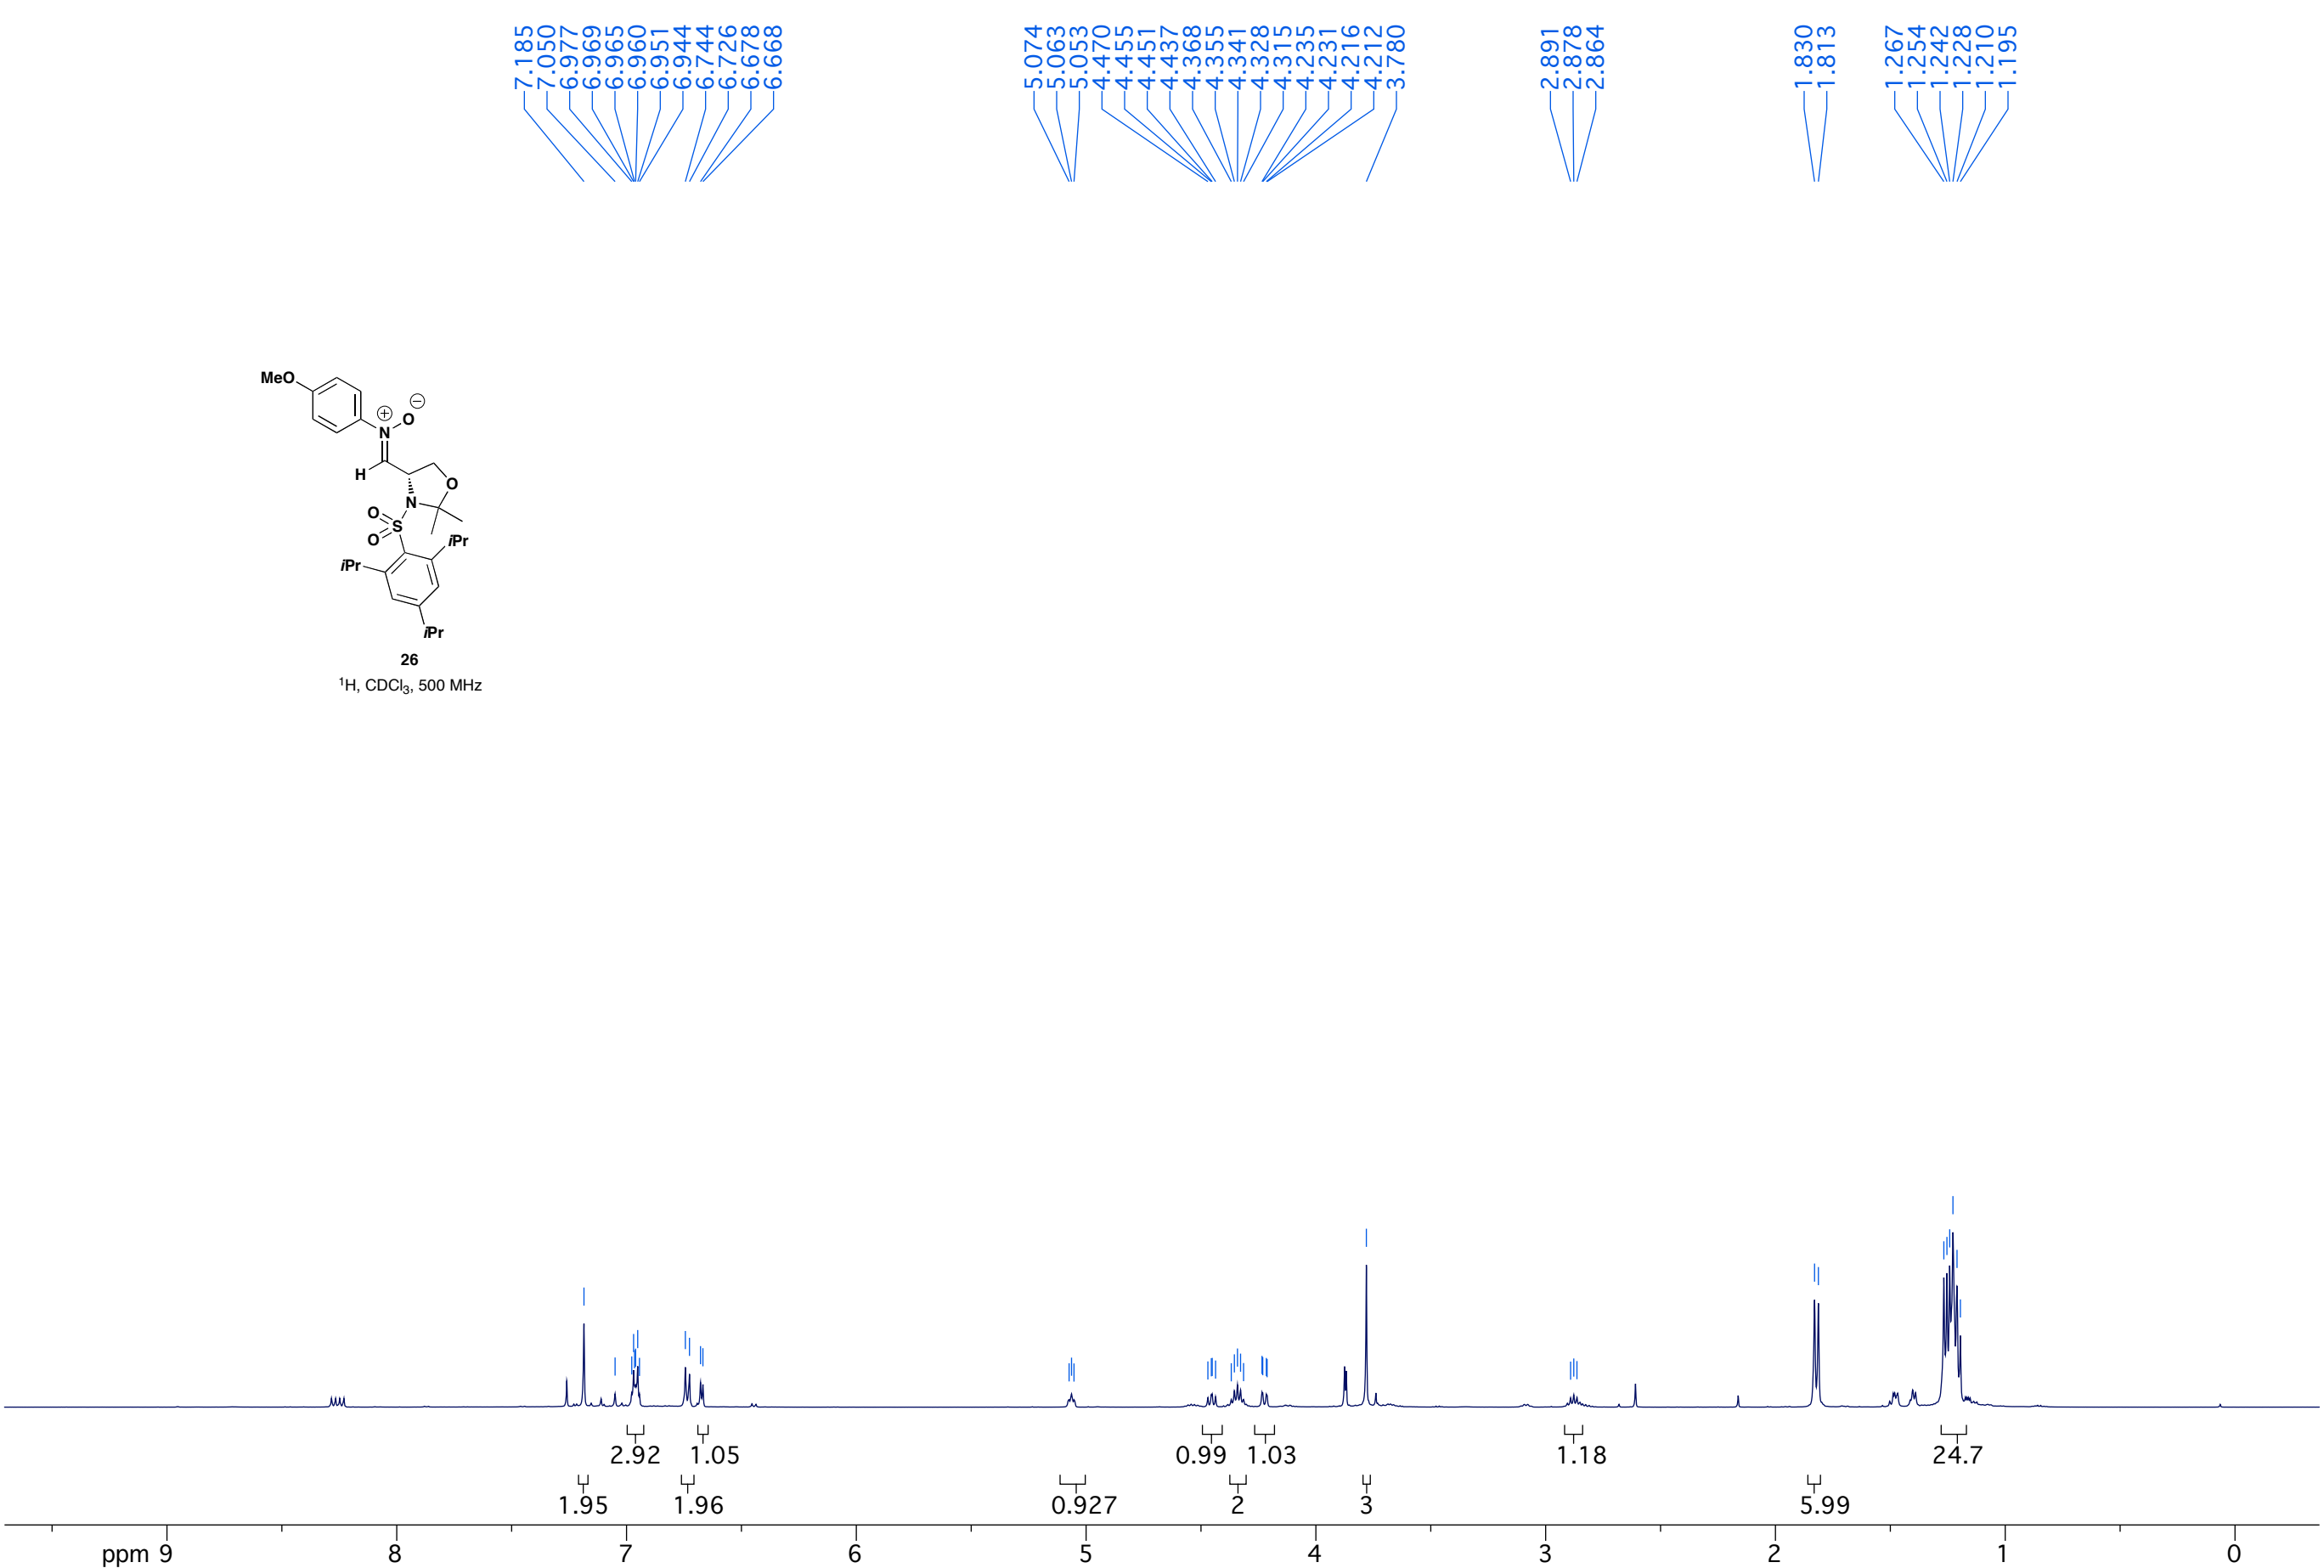

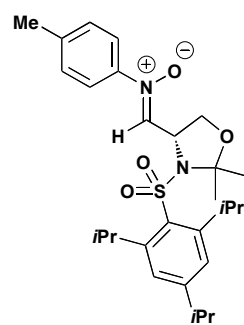

**27**

$^{13}\text{C}$ ,  $\text{CDCl}_3$ , 100 MHz

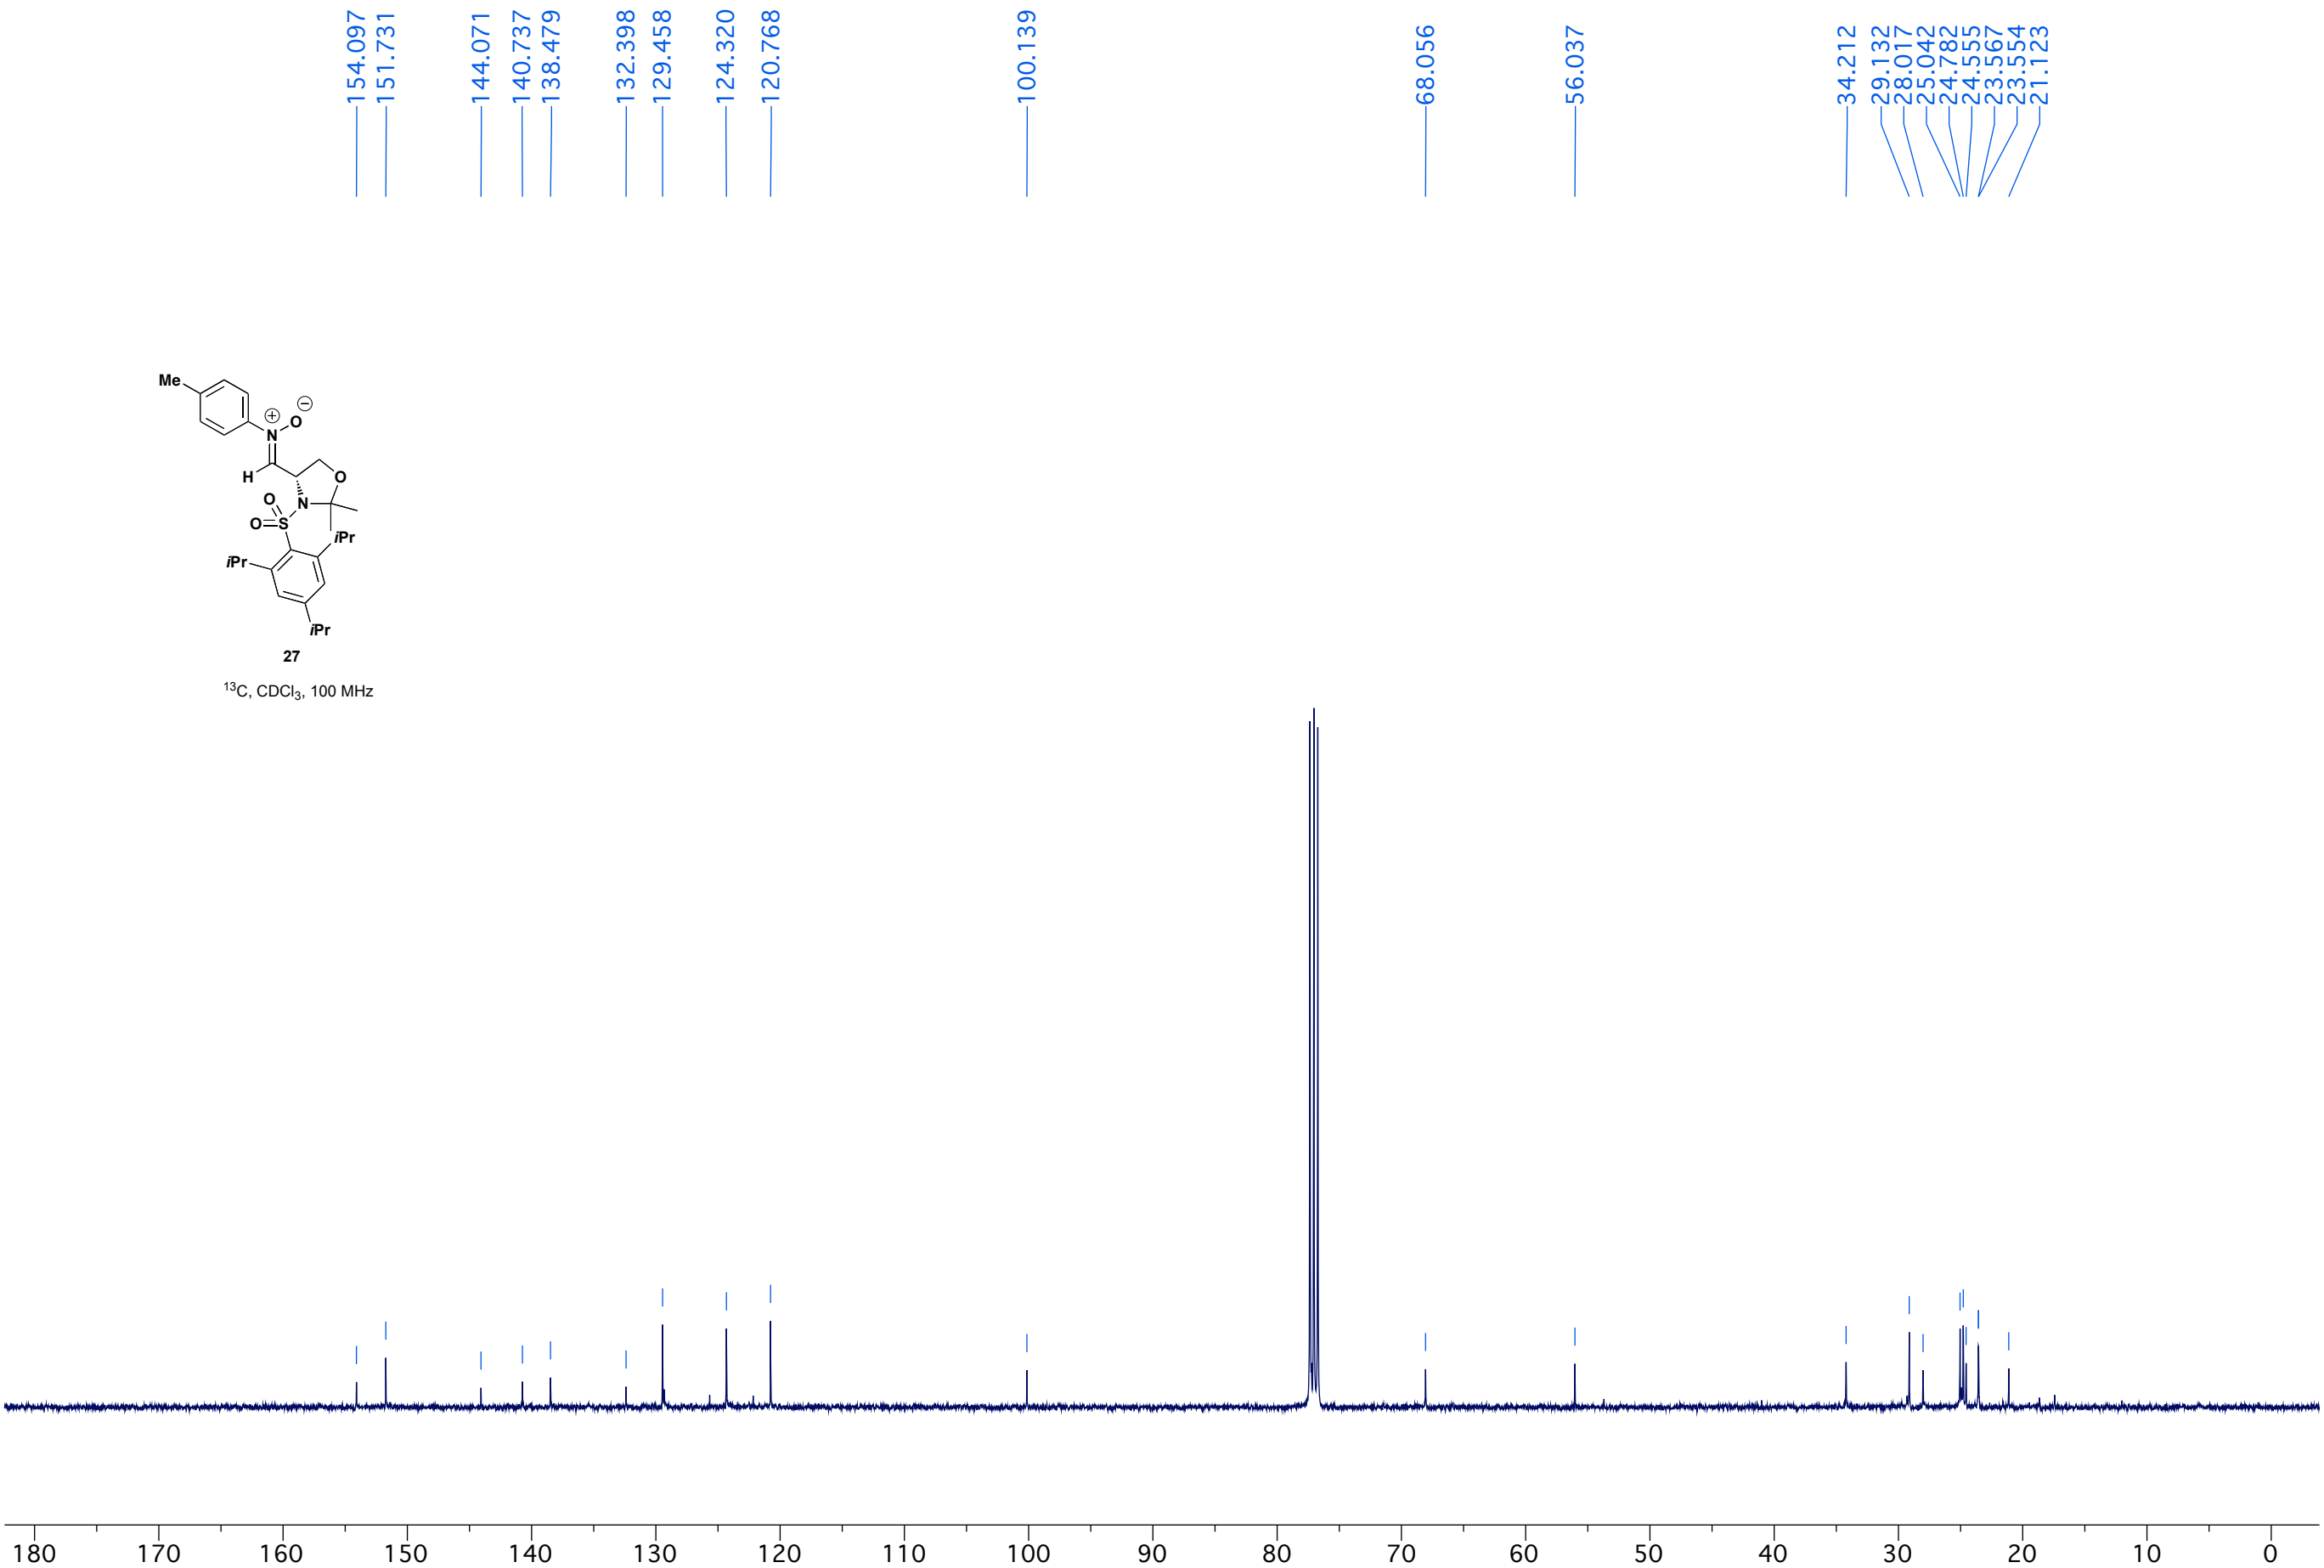

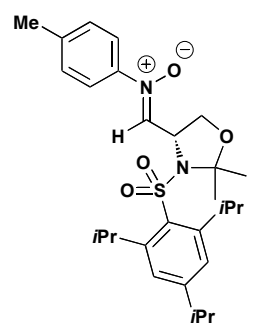

27

<sup>1</sup>H, CDCl<sub>3</sub>, 400 MHz

7.193  
7.117  
6.999  
6.978  
6.857  
6.836  
6.644  
6.630

5.022  
5.019  
5.005  
4.992  
4.395  
4.391  
4.300  
4.283  
4.266  
4.177  
4.173  
4.154  
4.149

2.843  
2.826  
2.809  
2.791  
2.774

2.260

1.765  
1.753  
1.738

1.203  
1.185  
1.166  
1.161  
1.143  
1.126

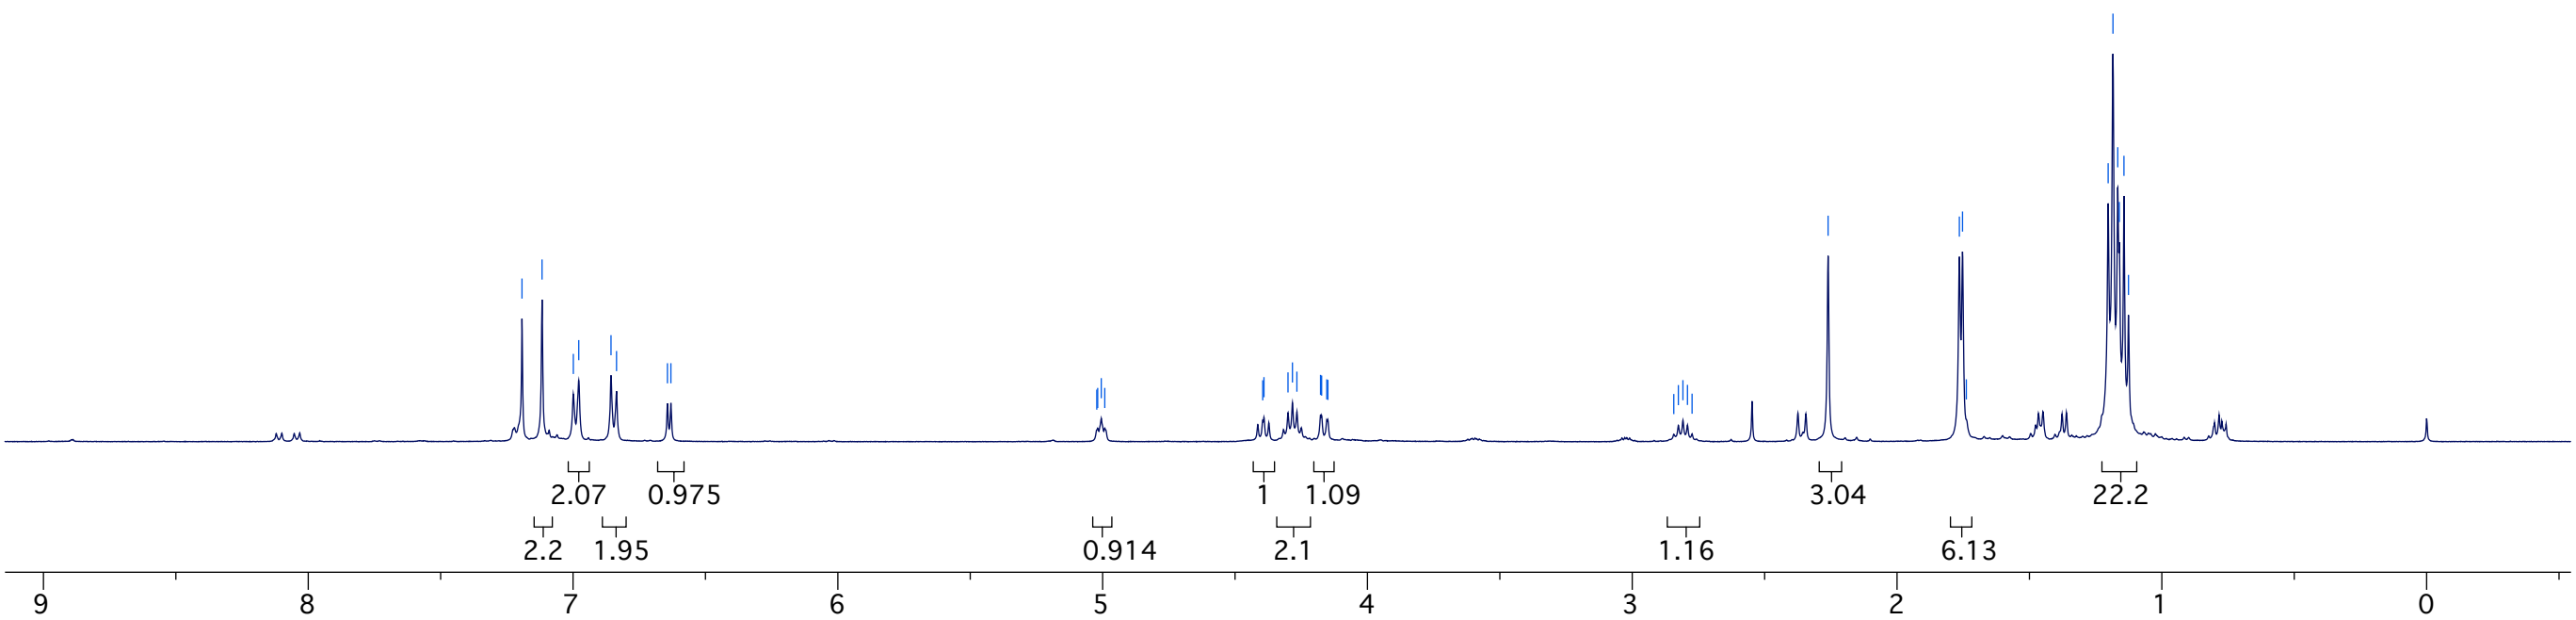

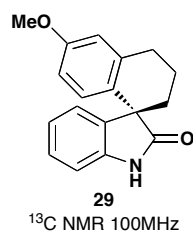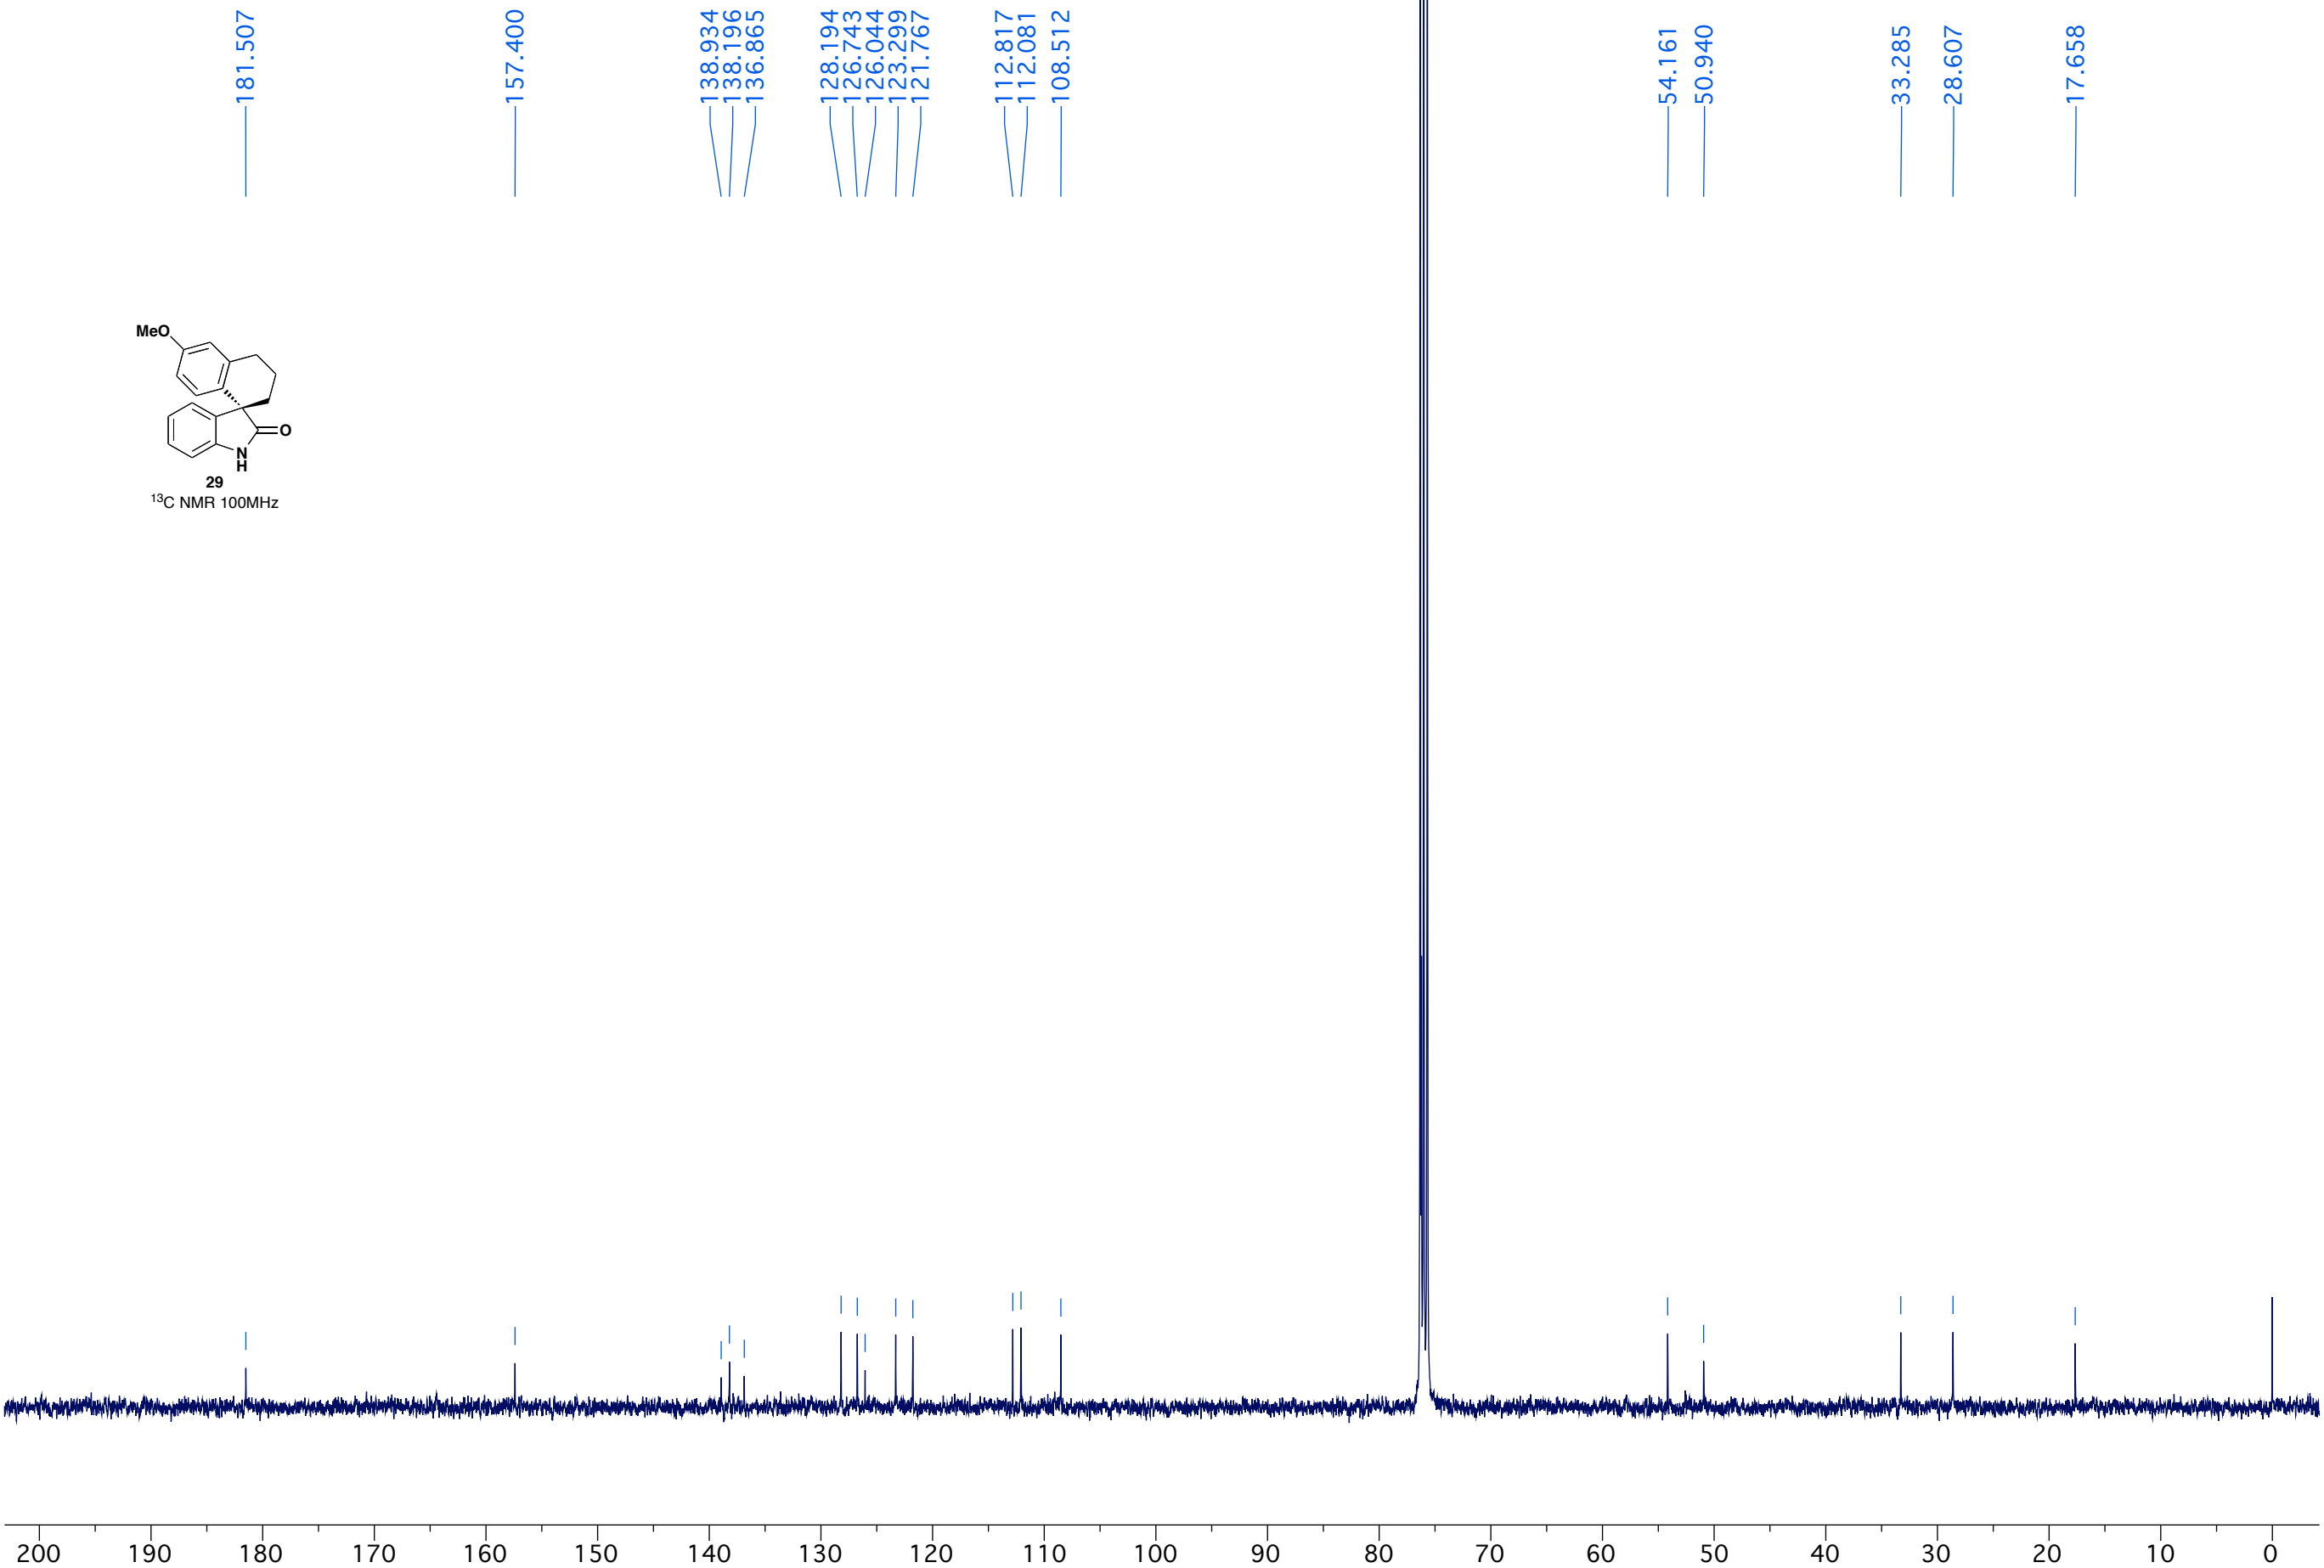

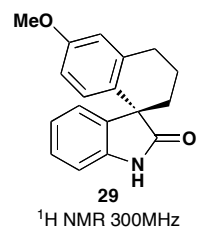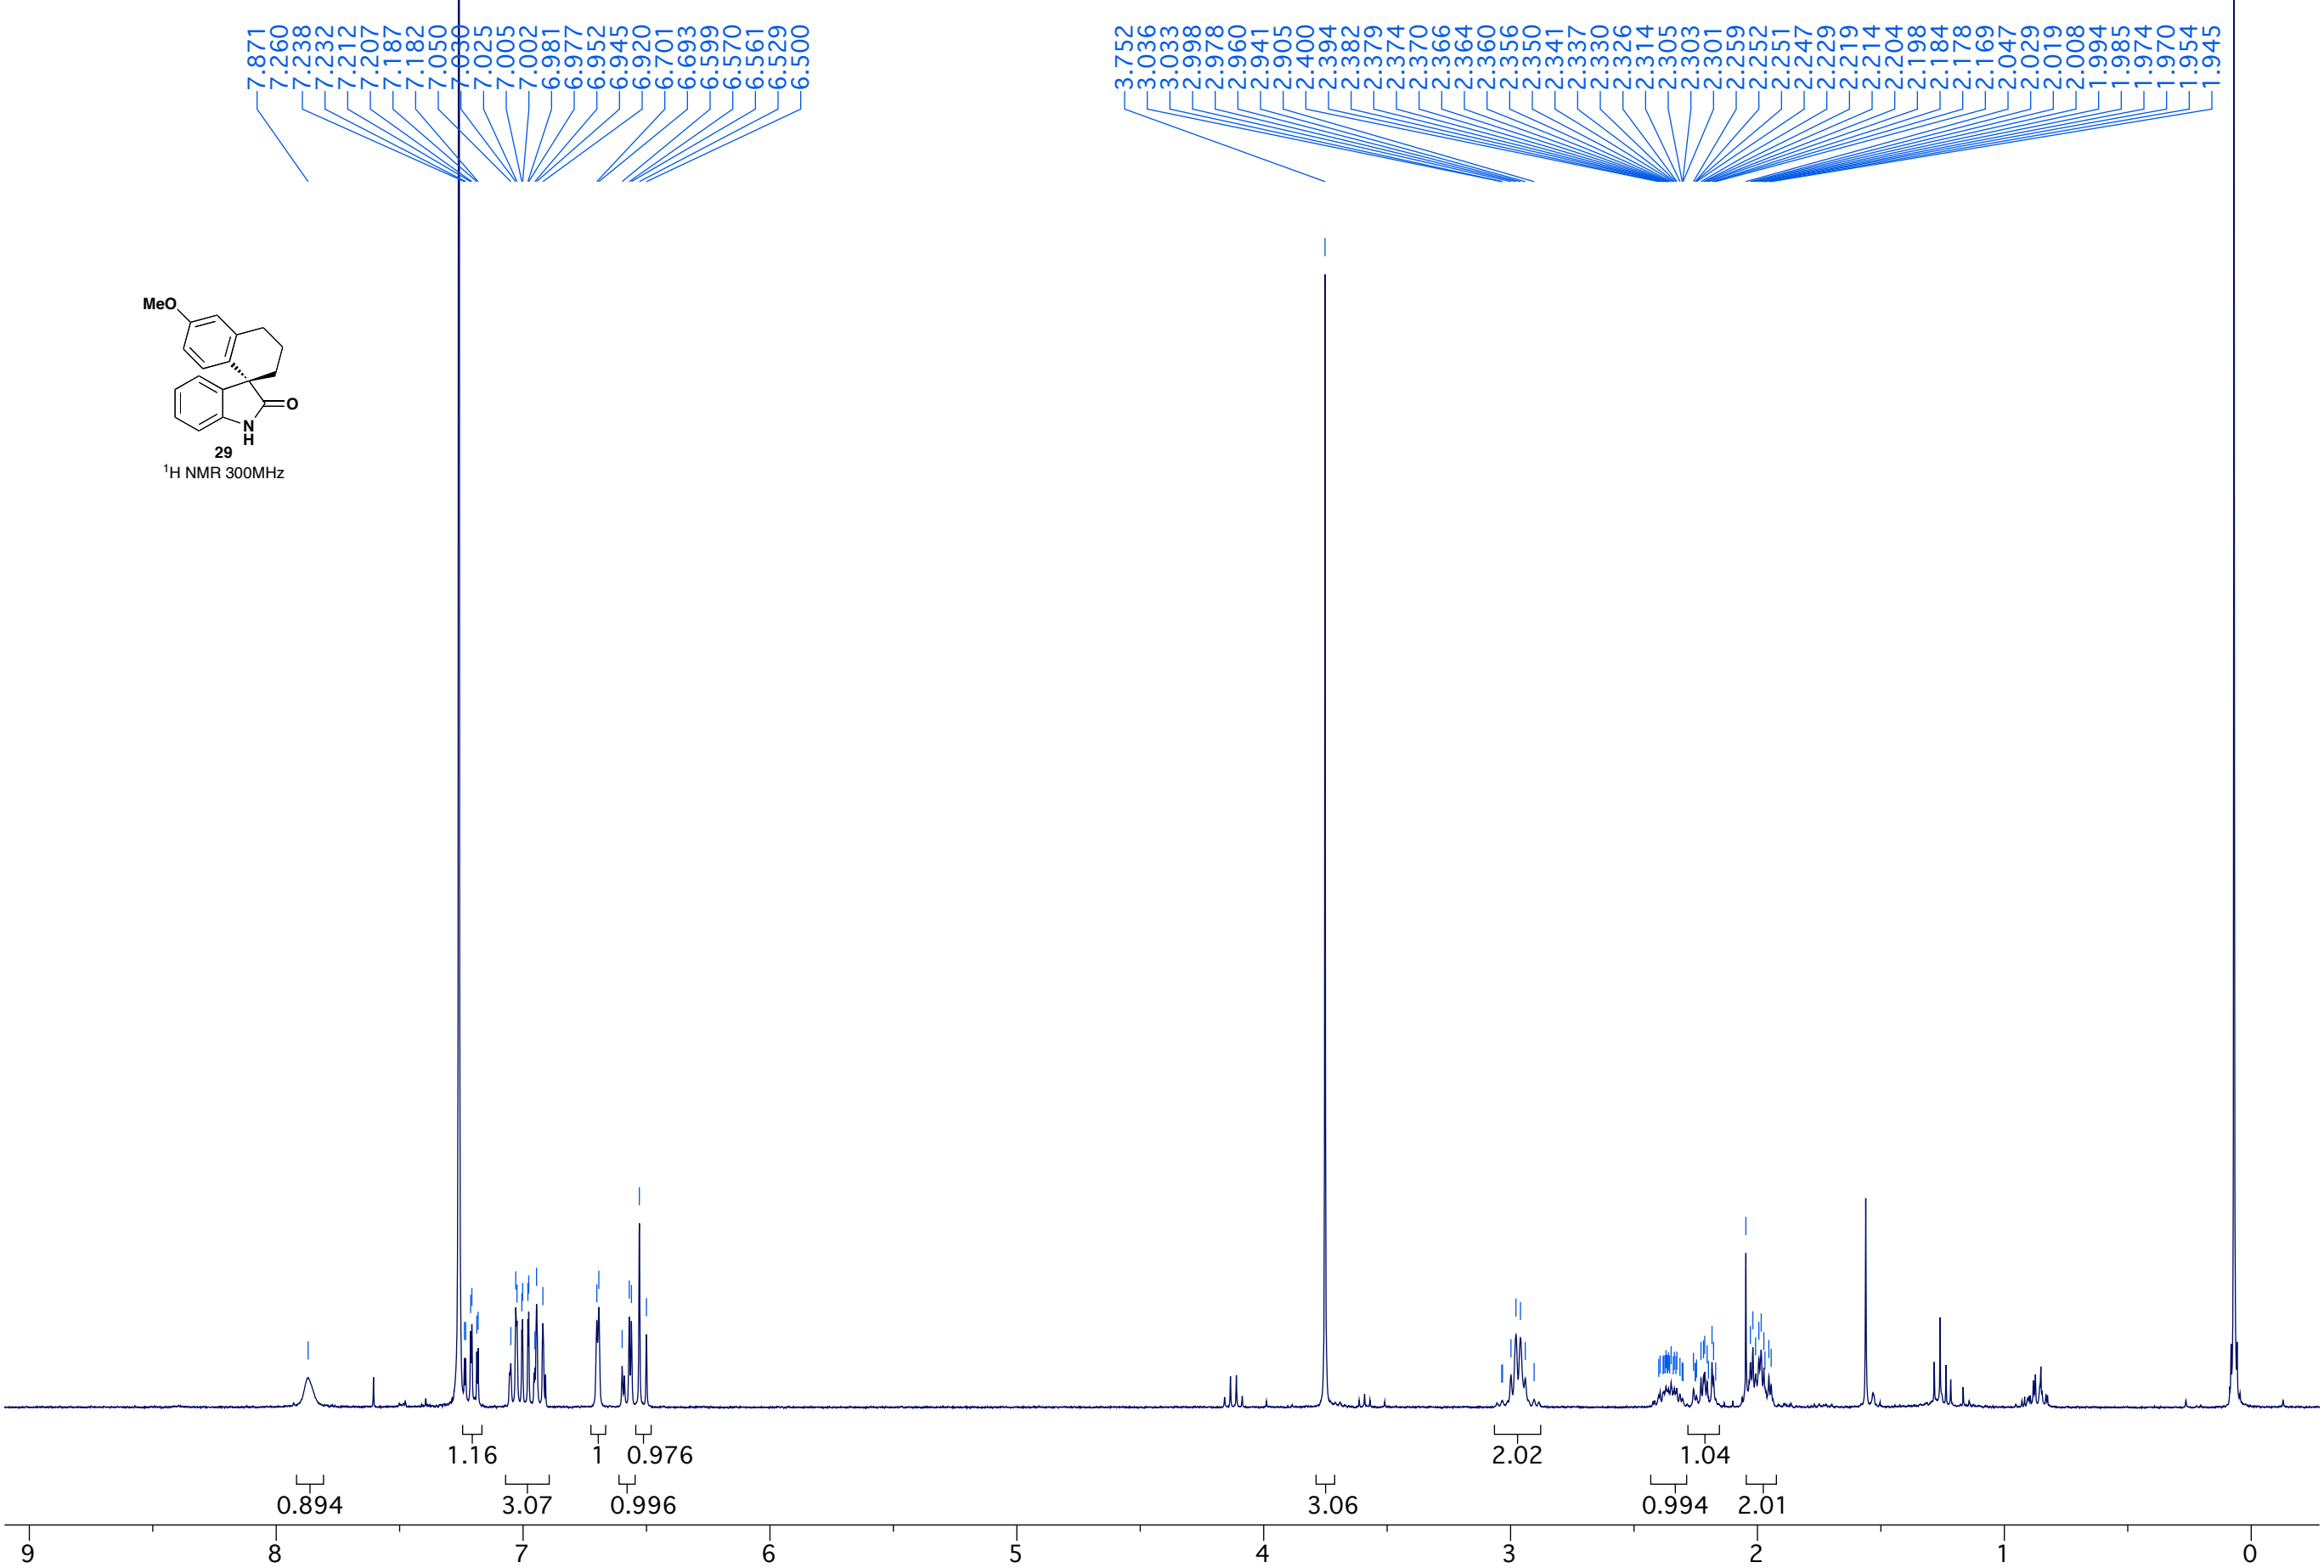



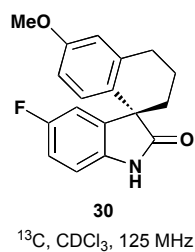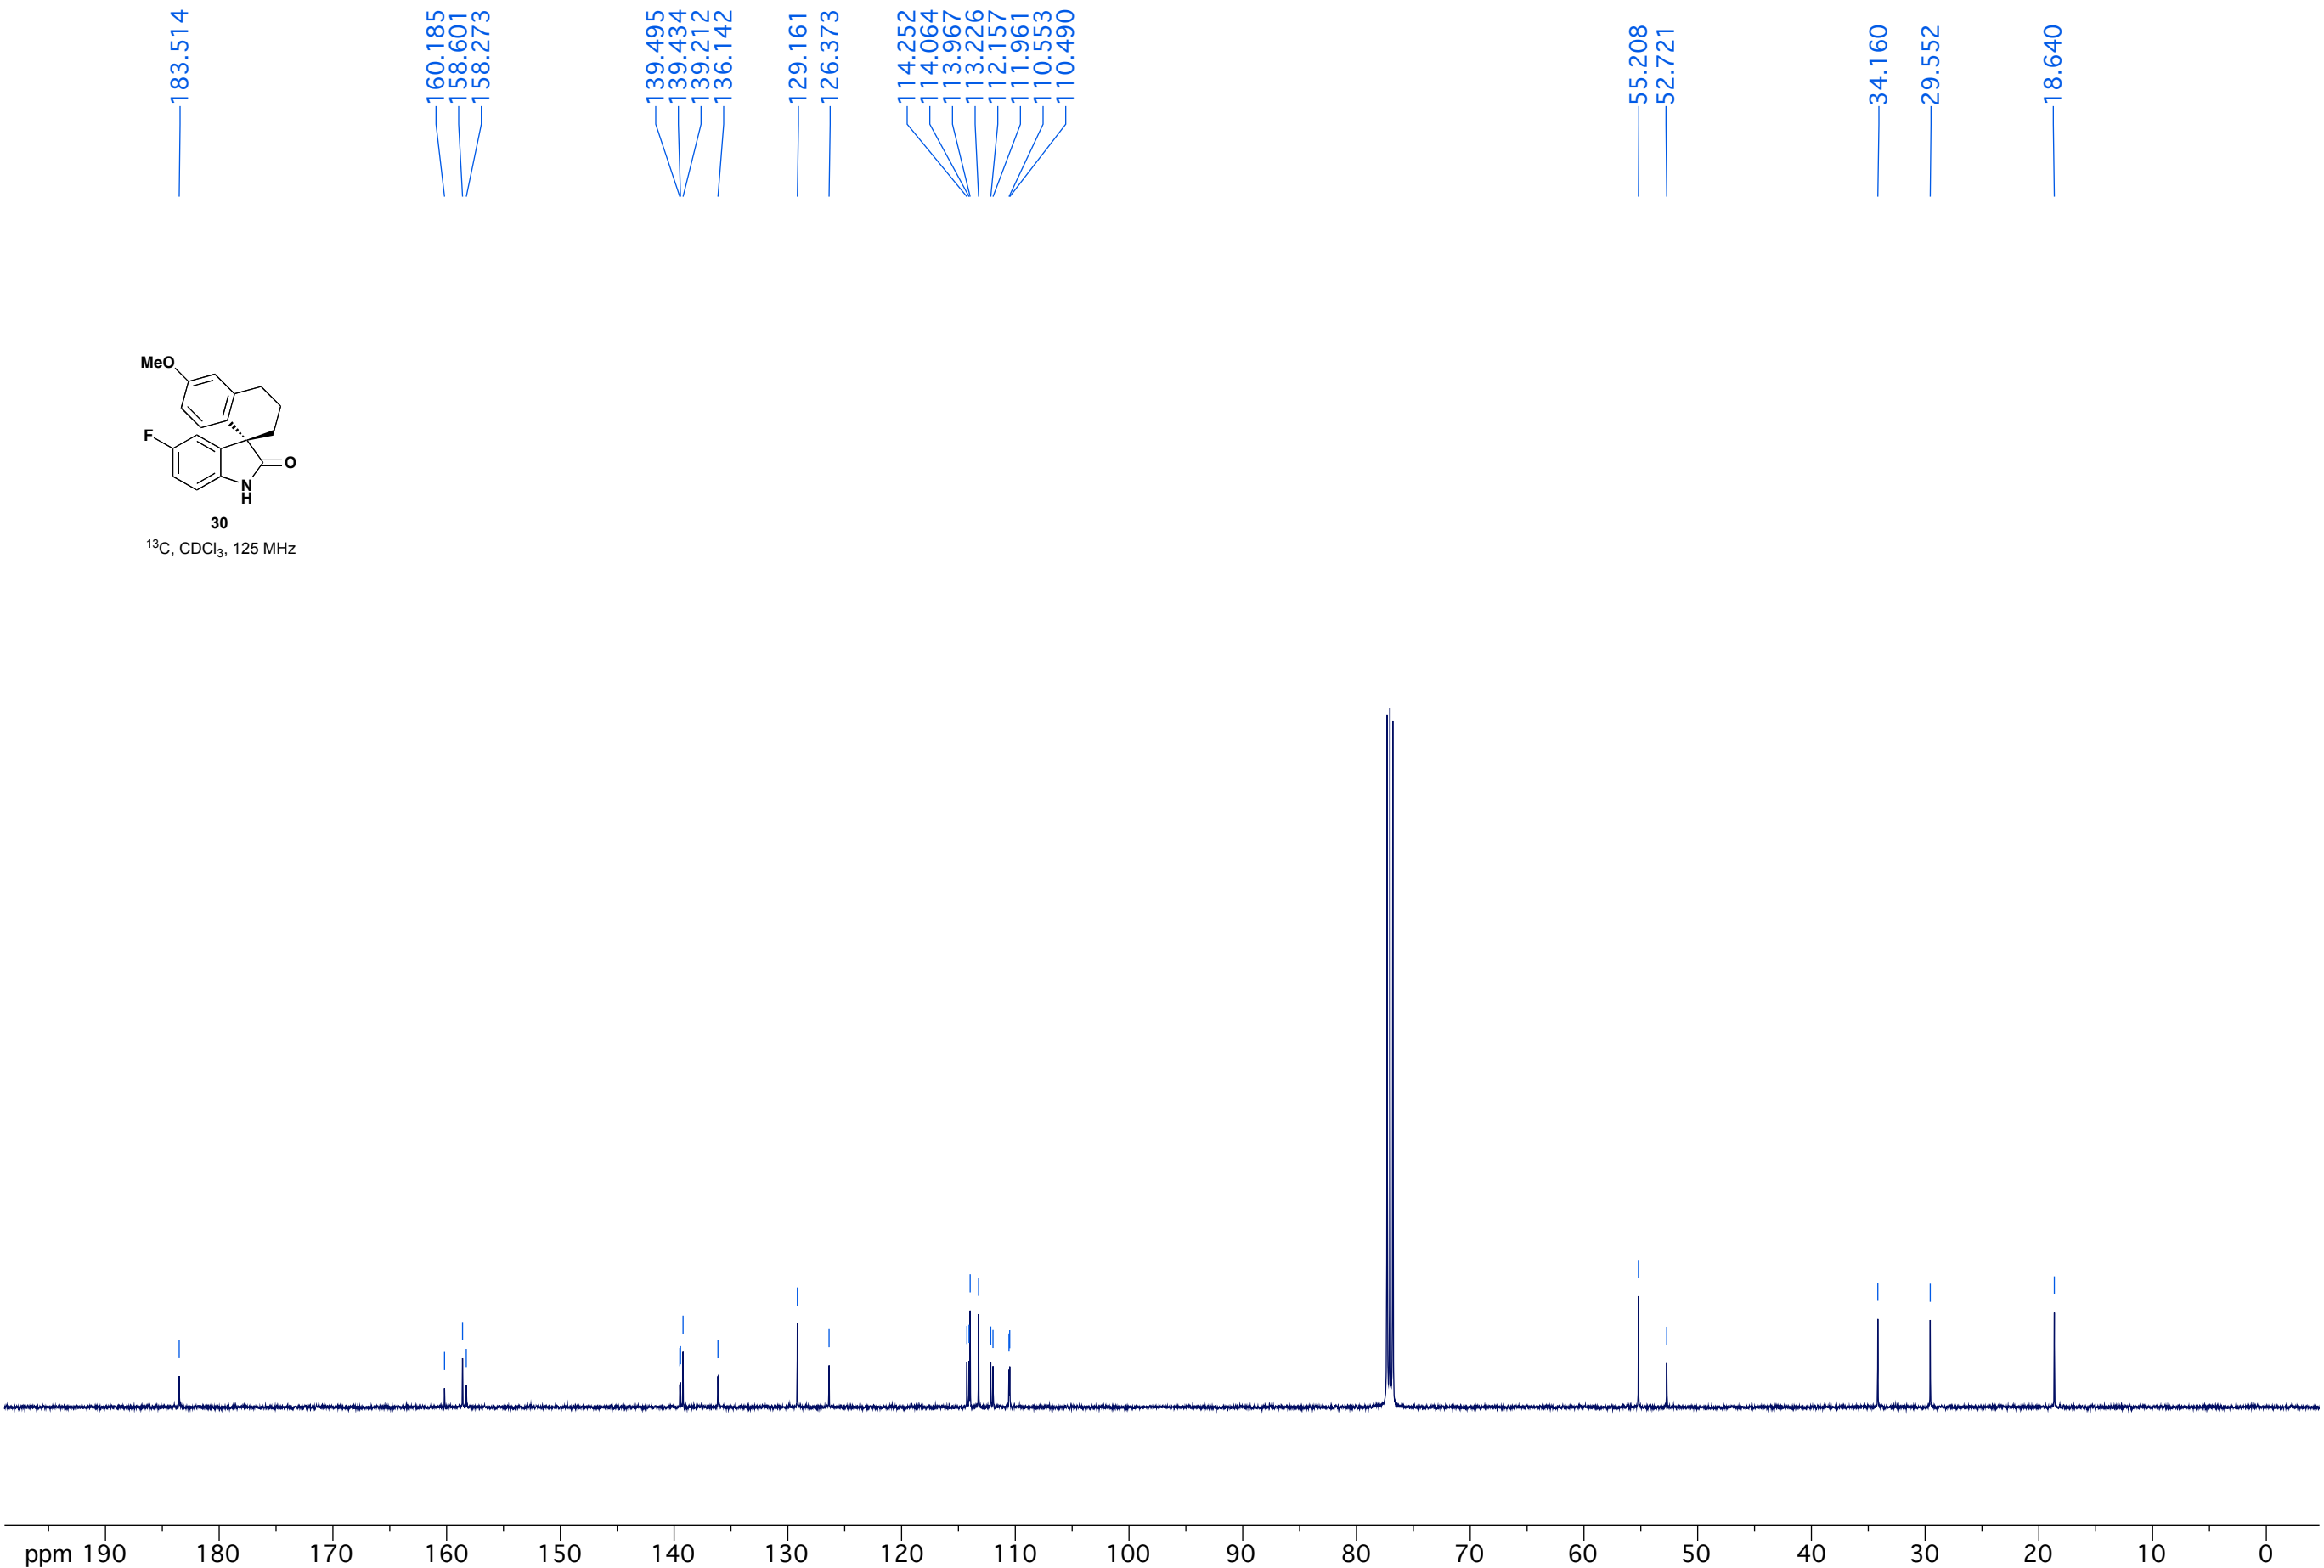

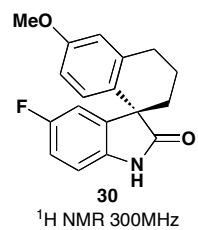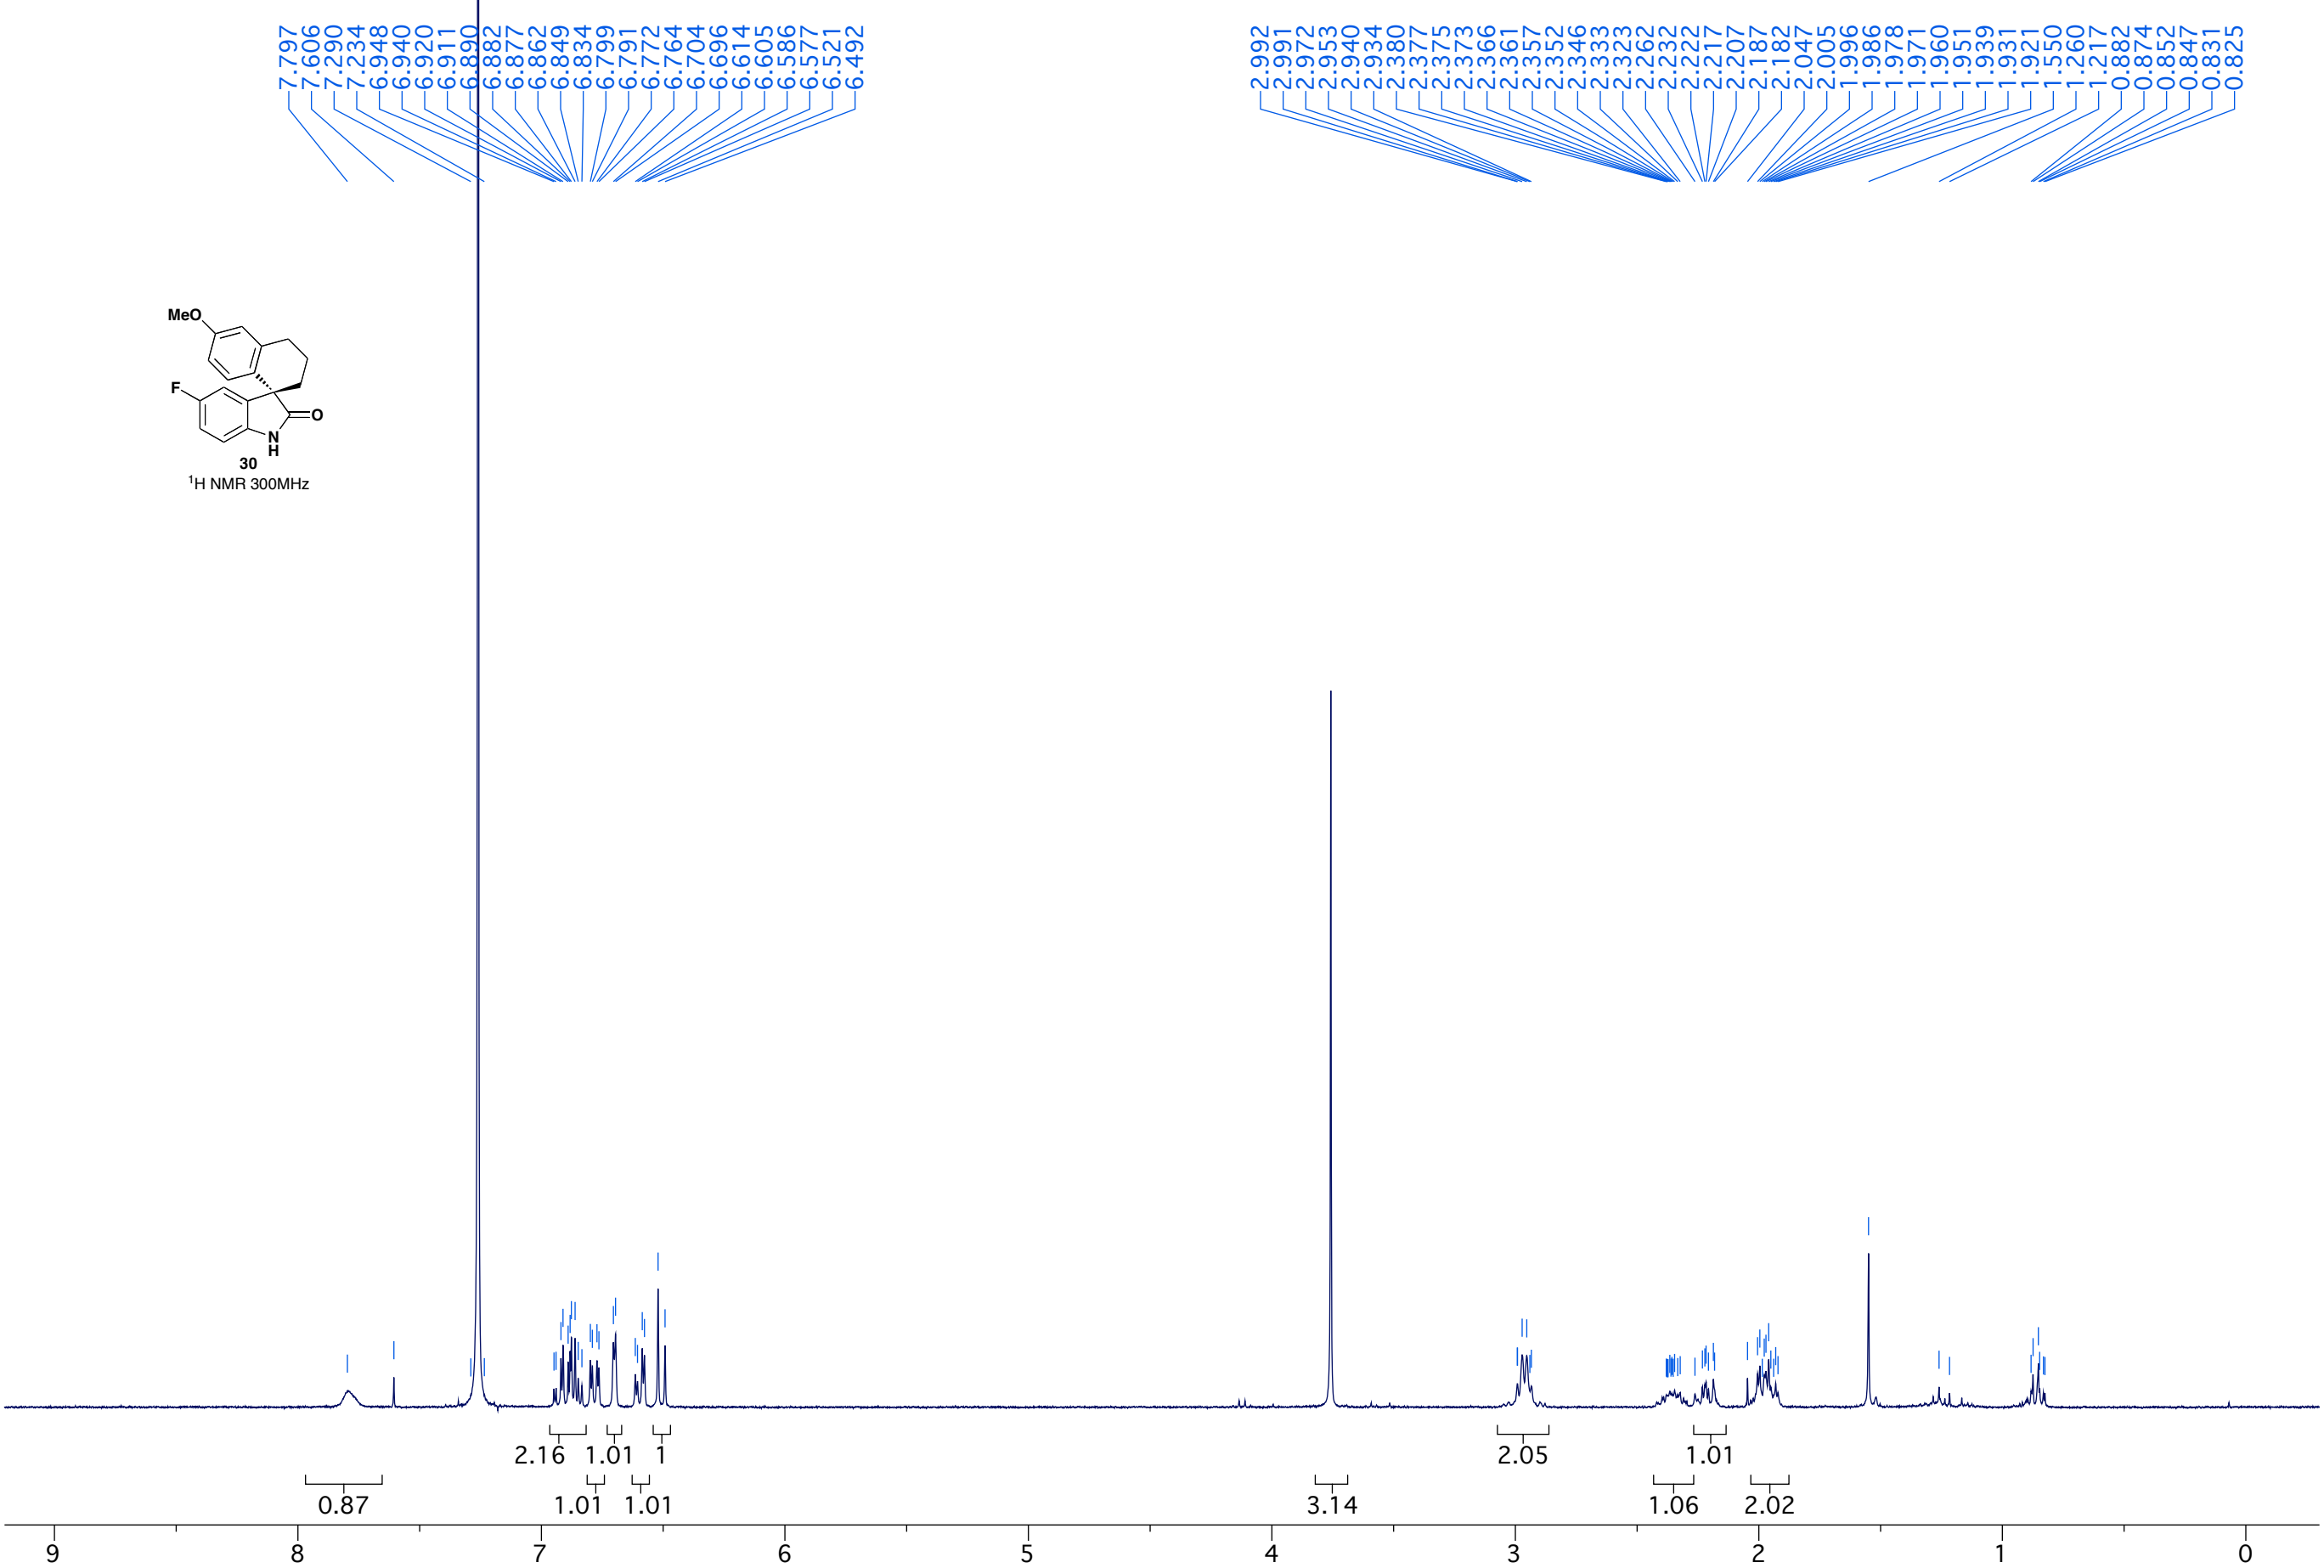

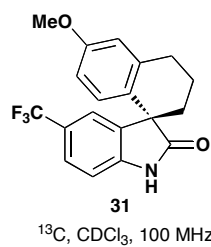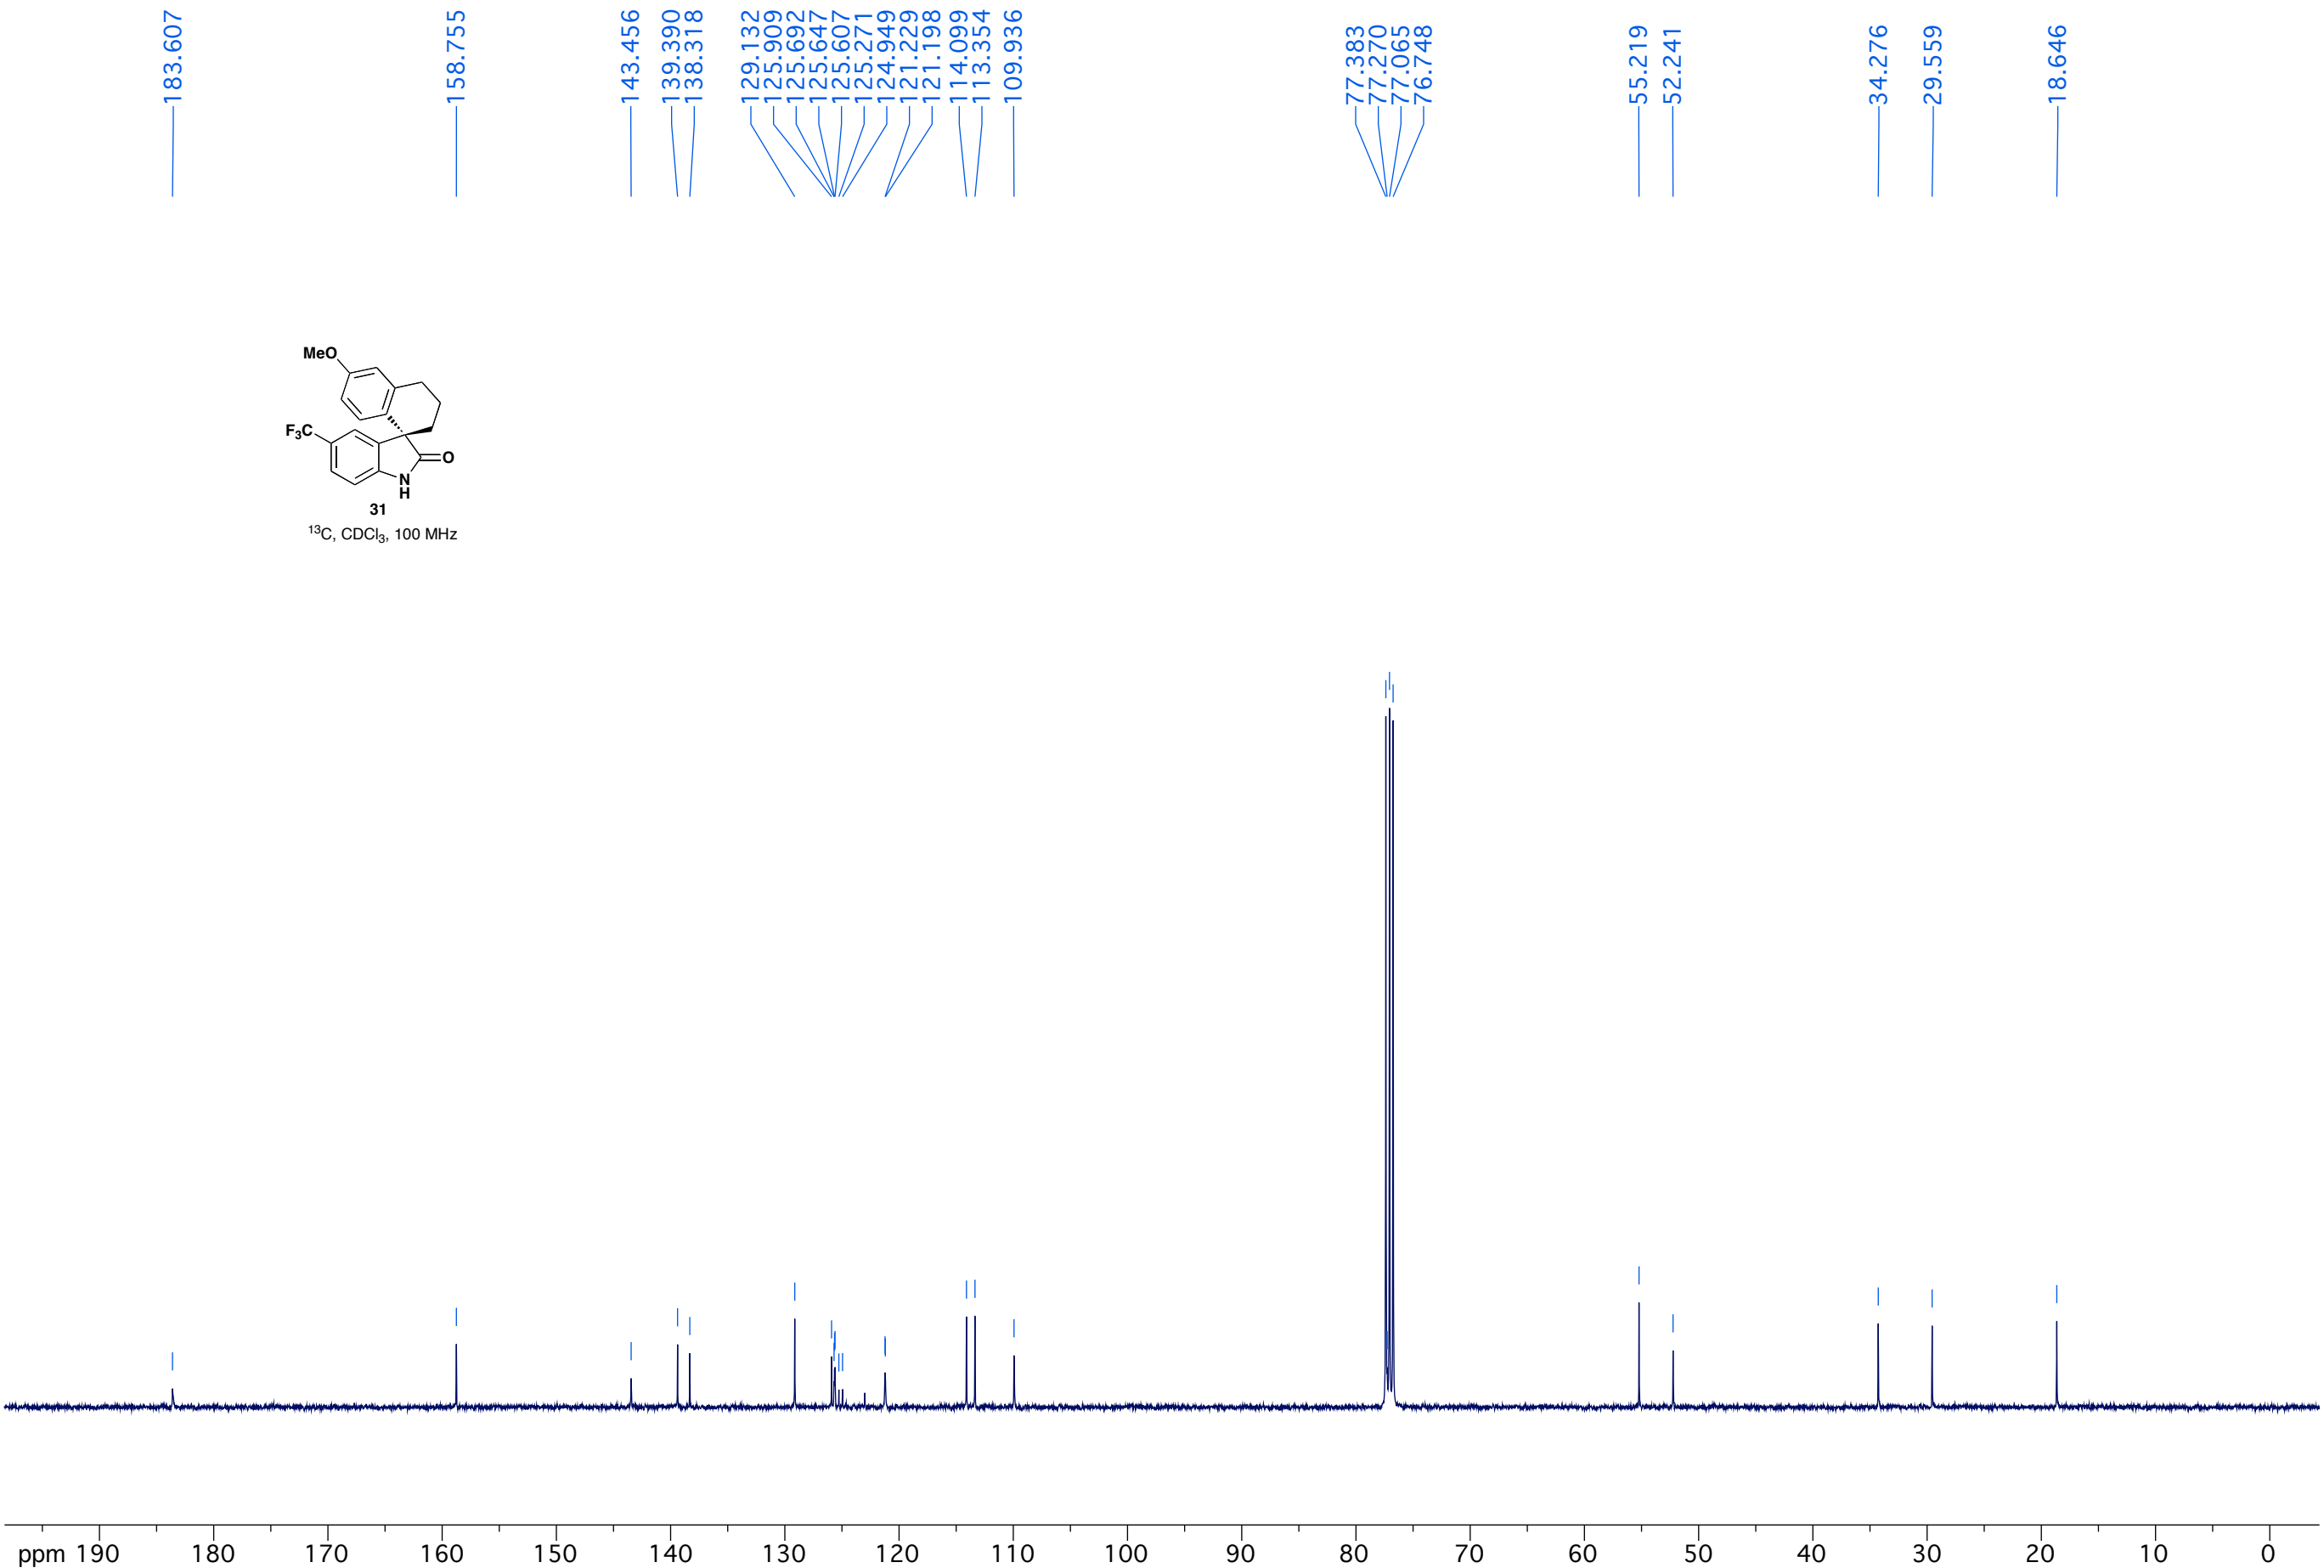

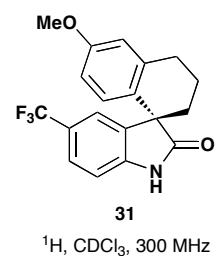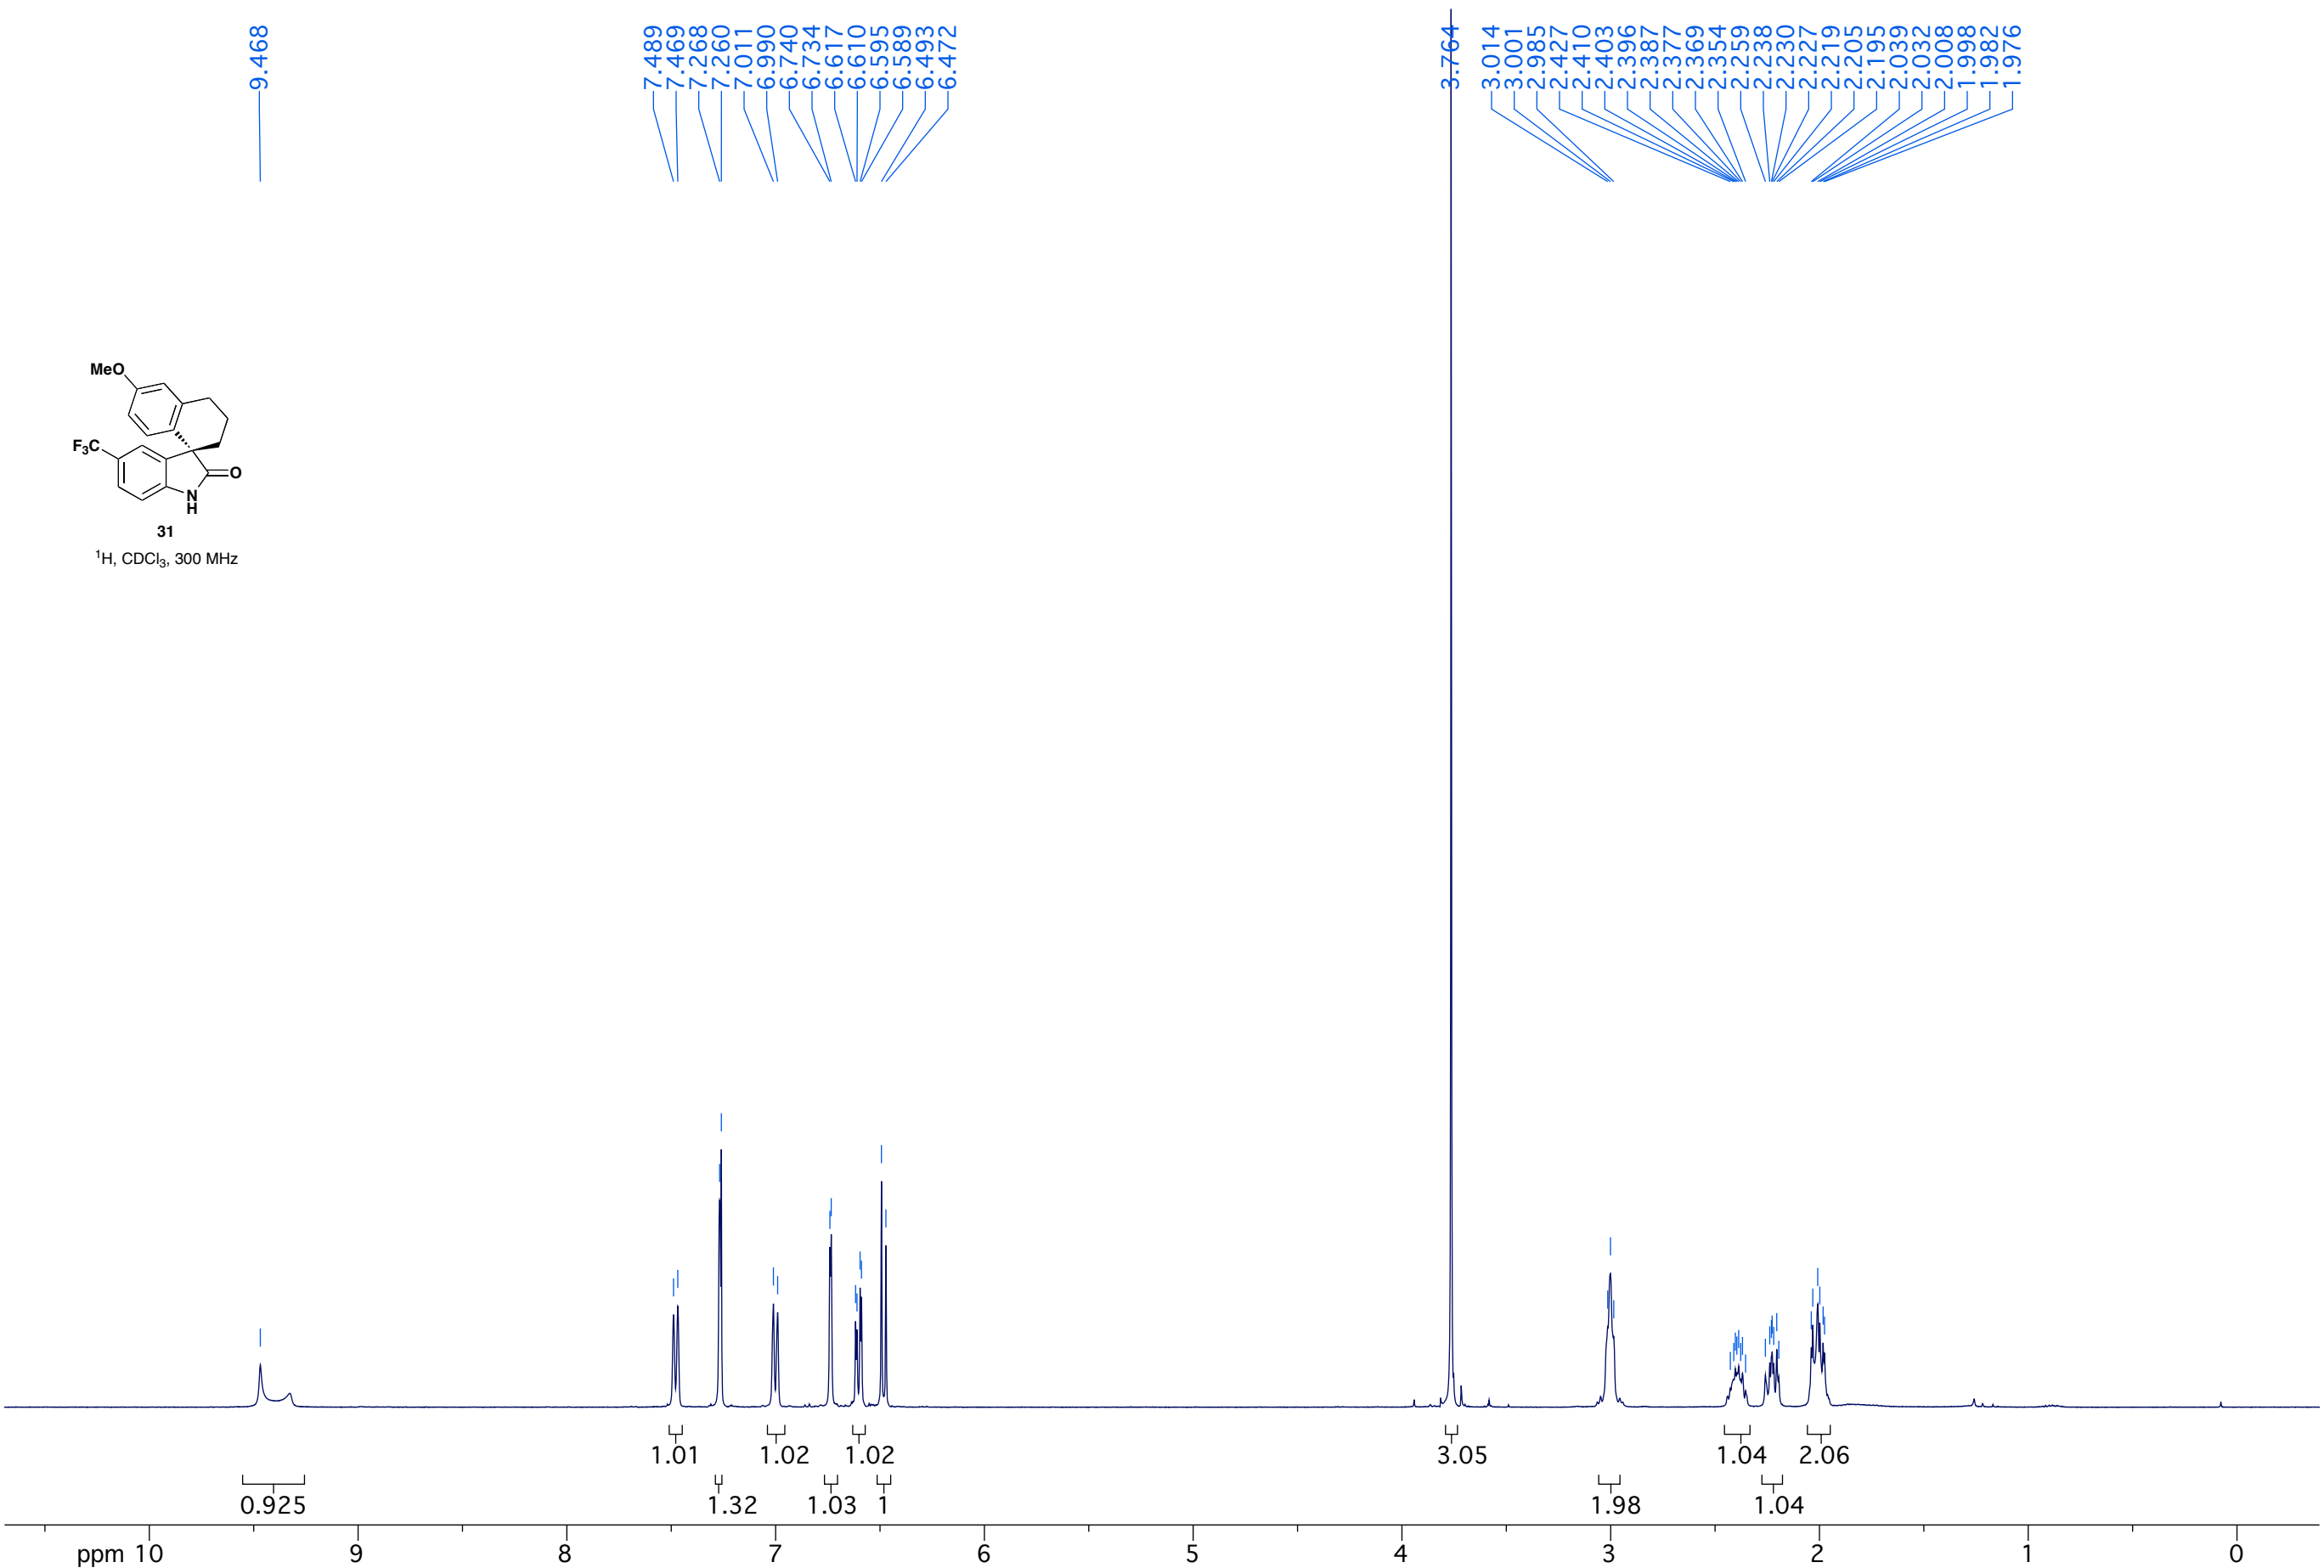

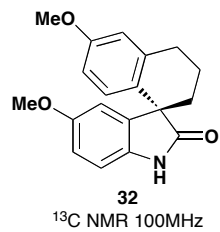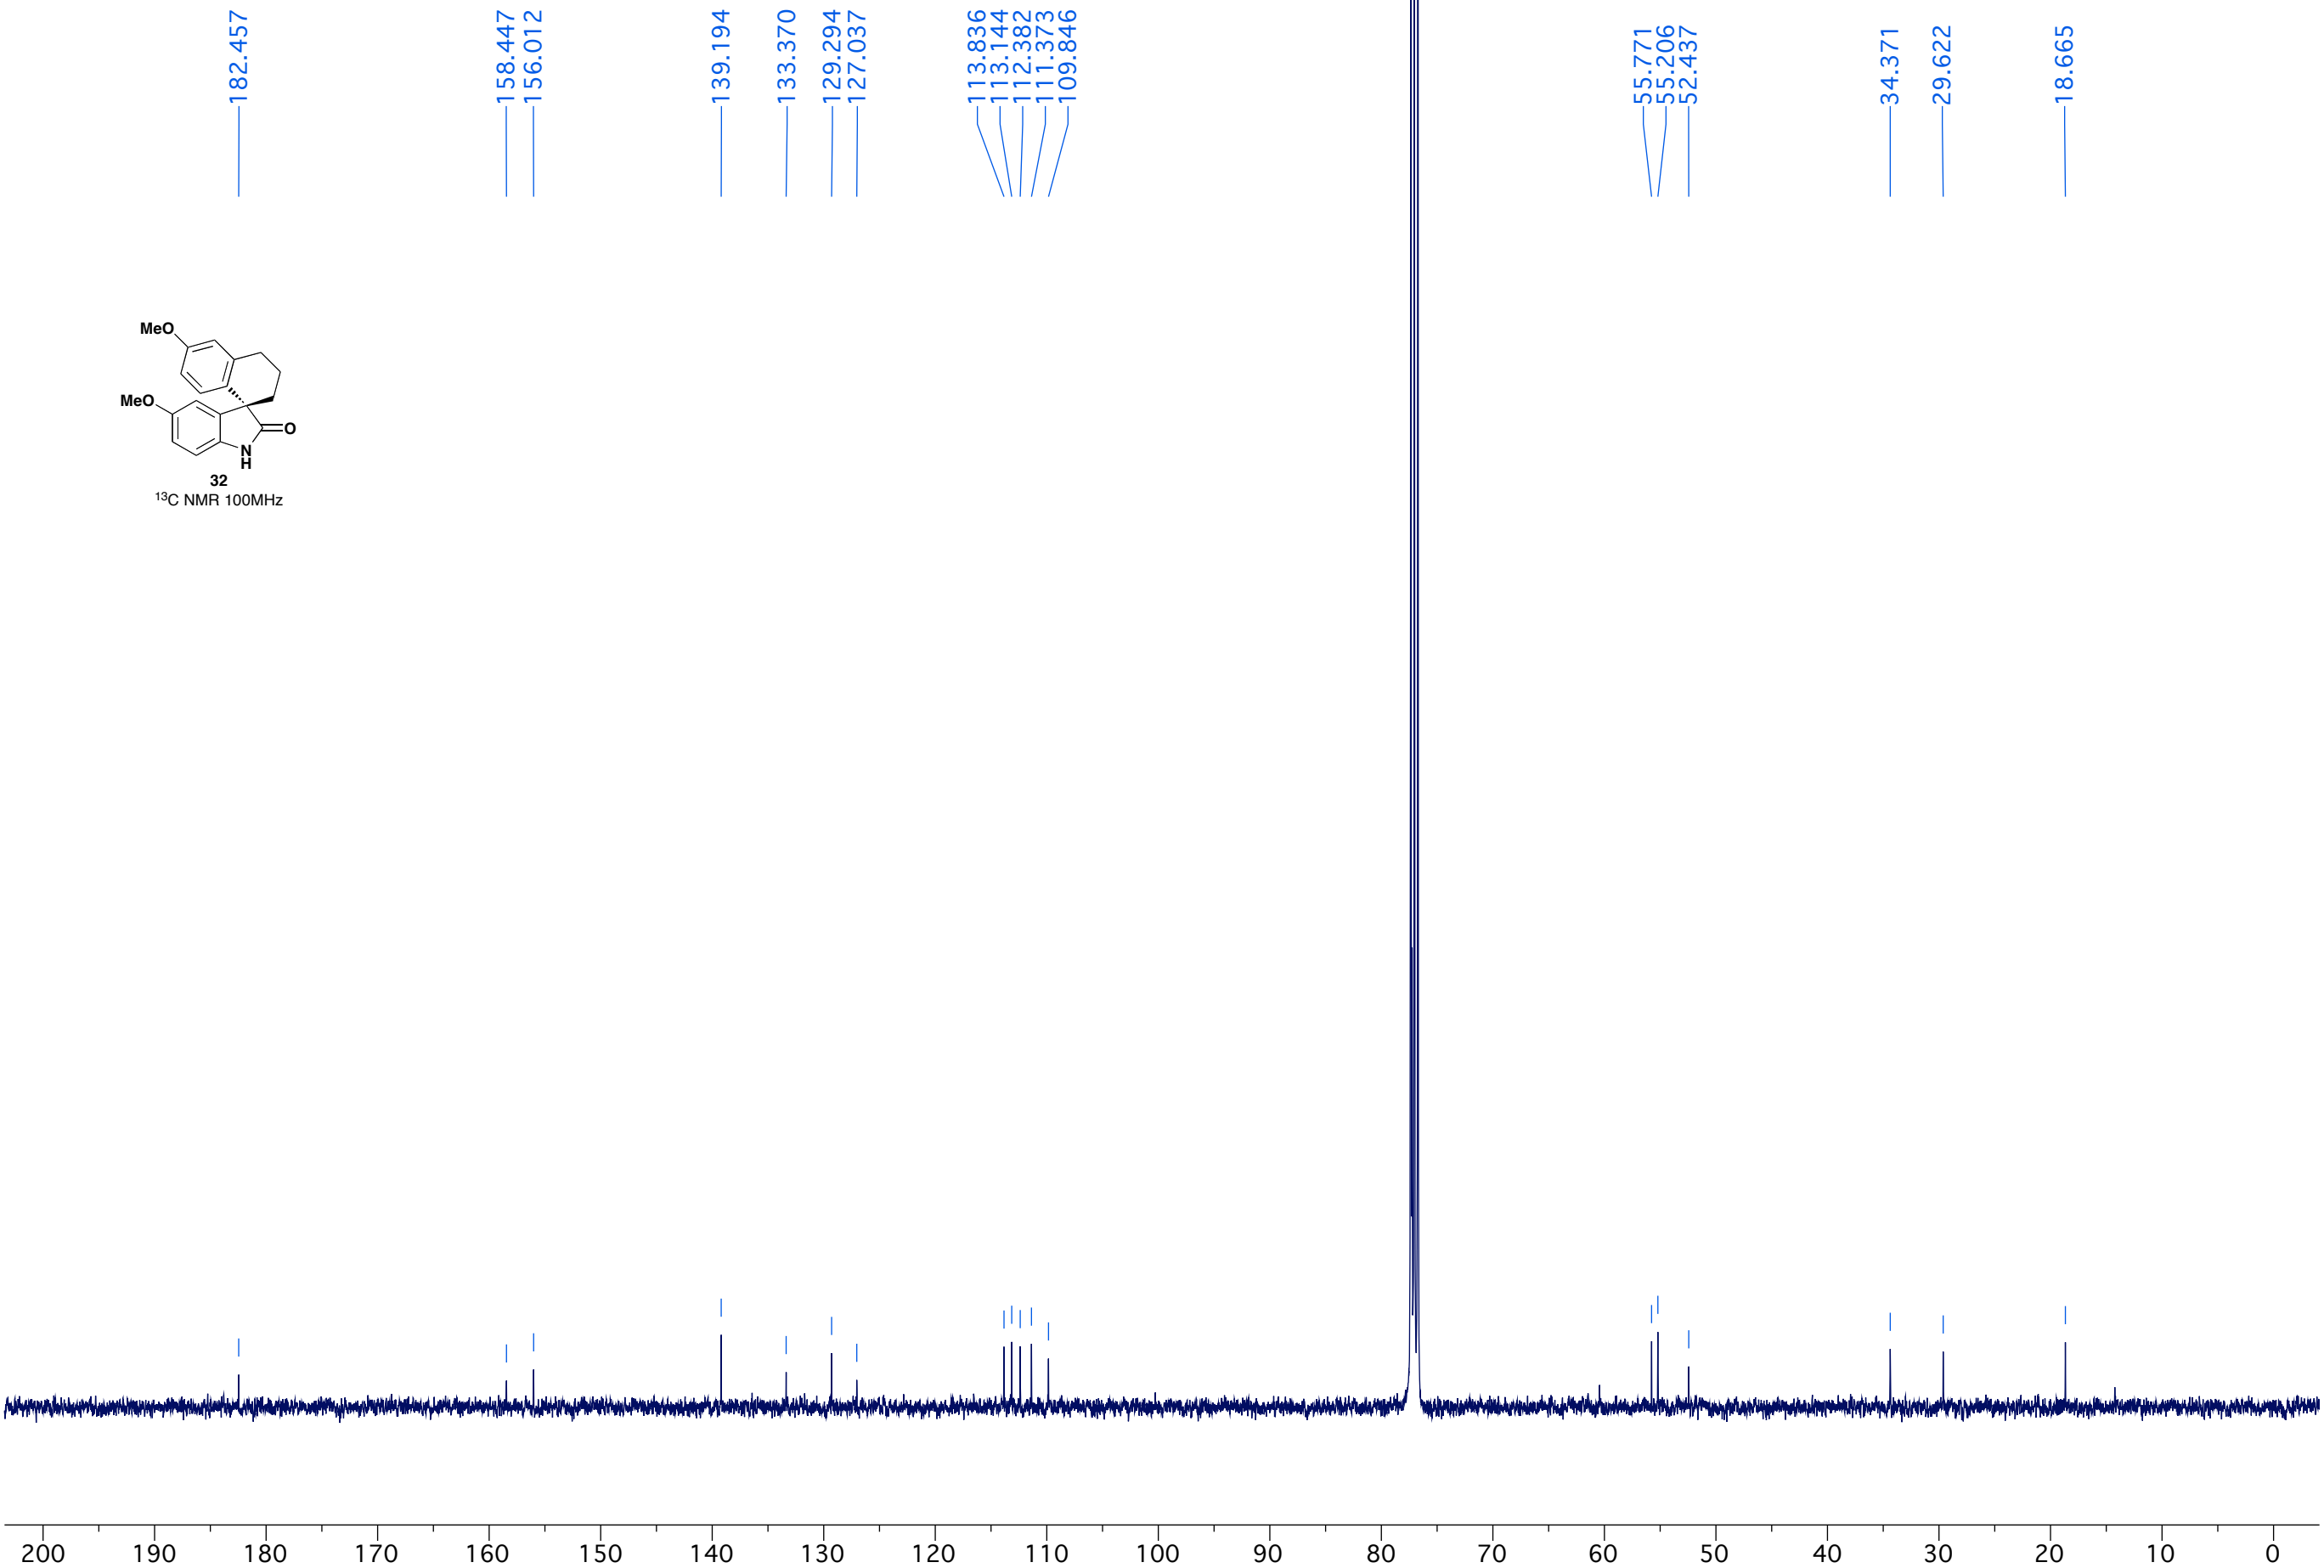

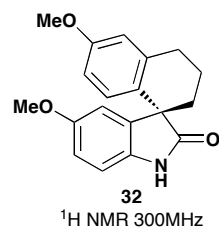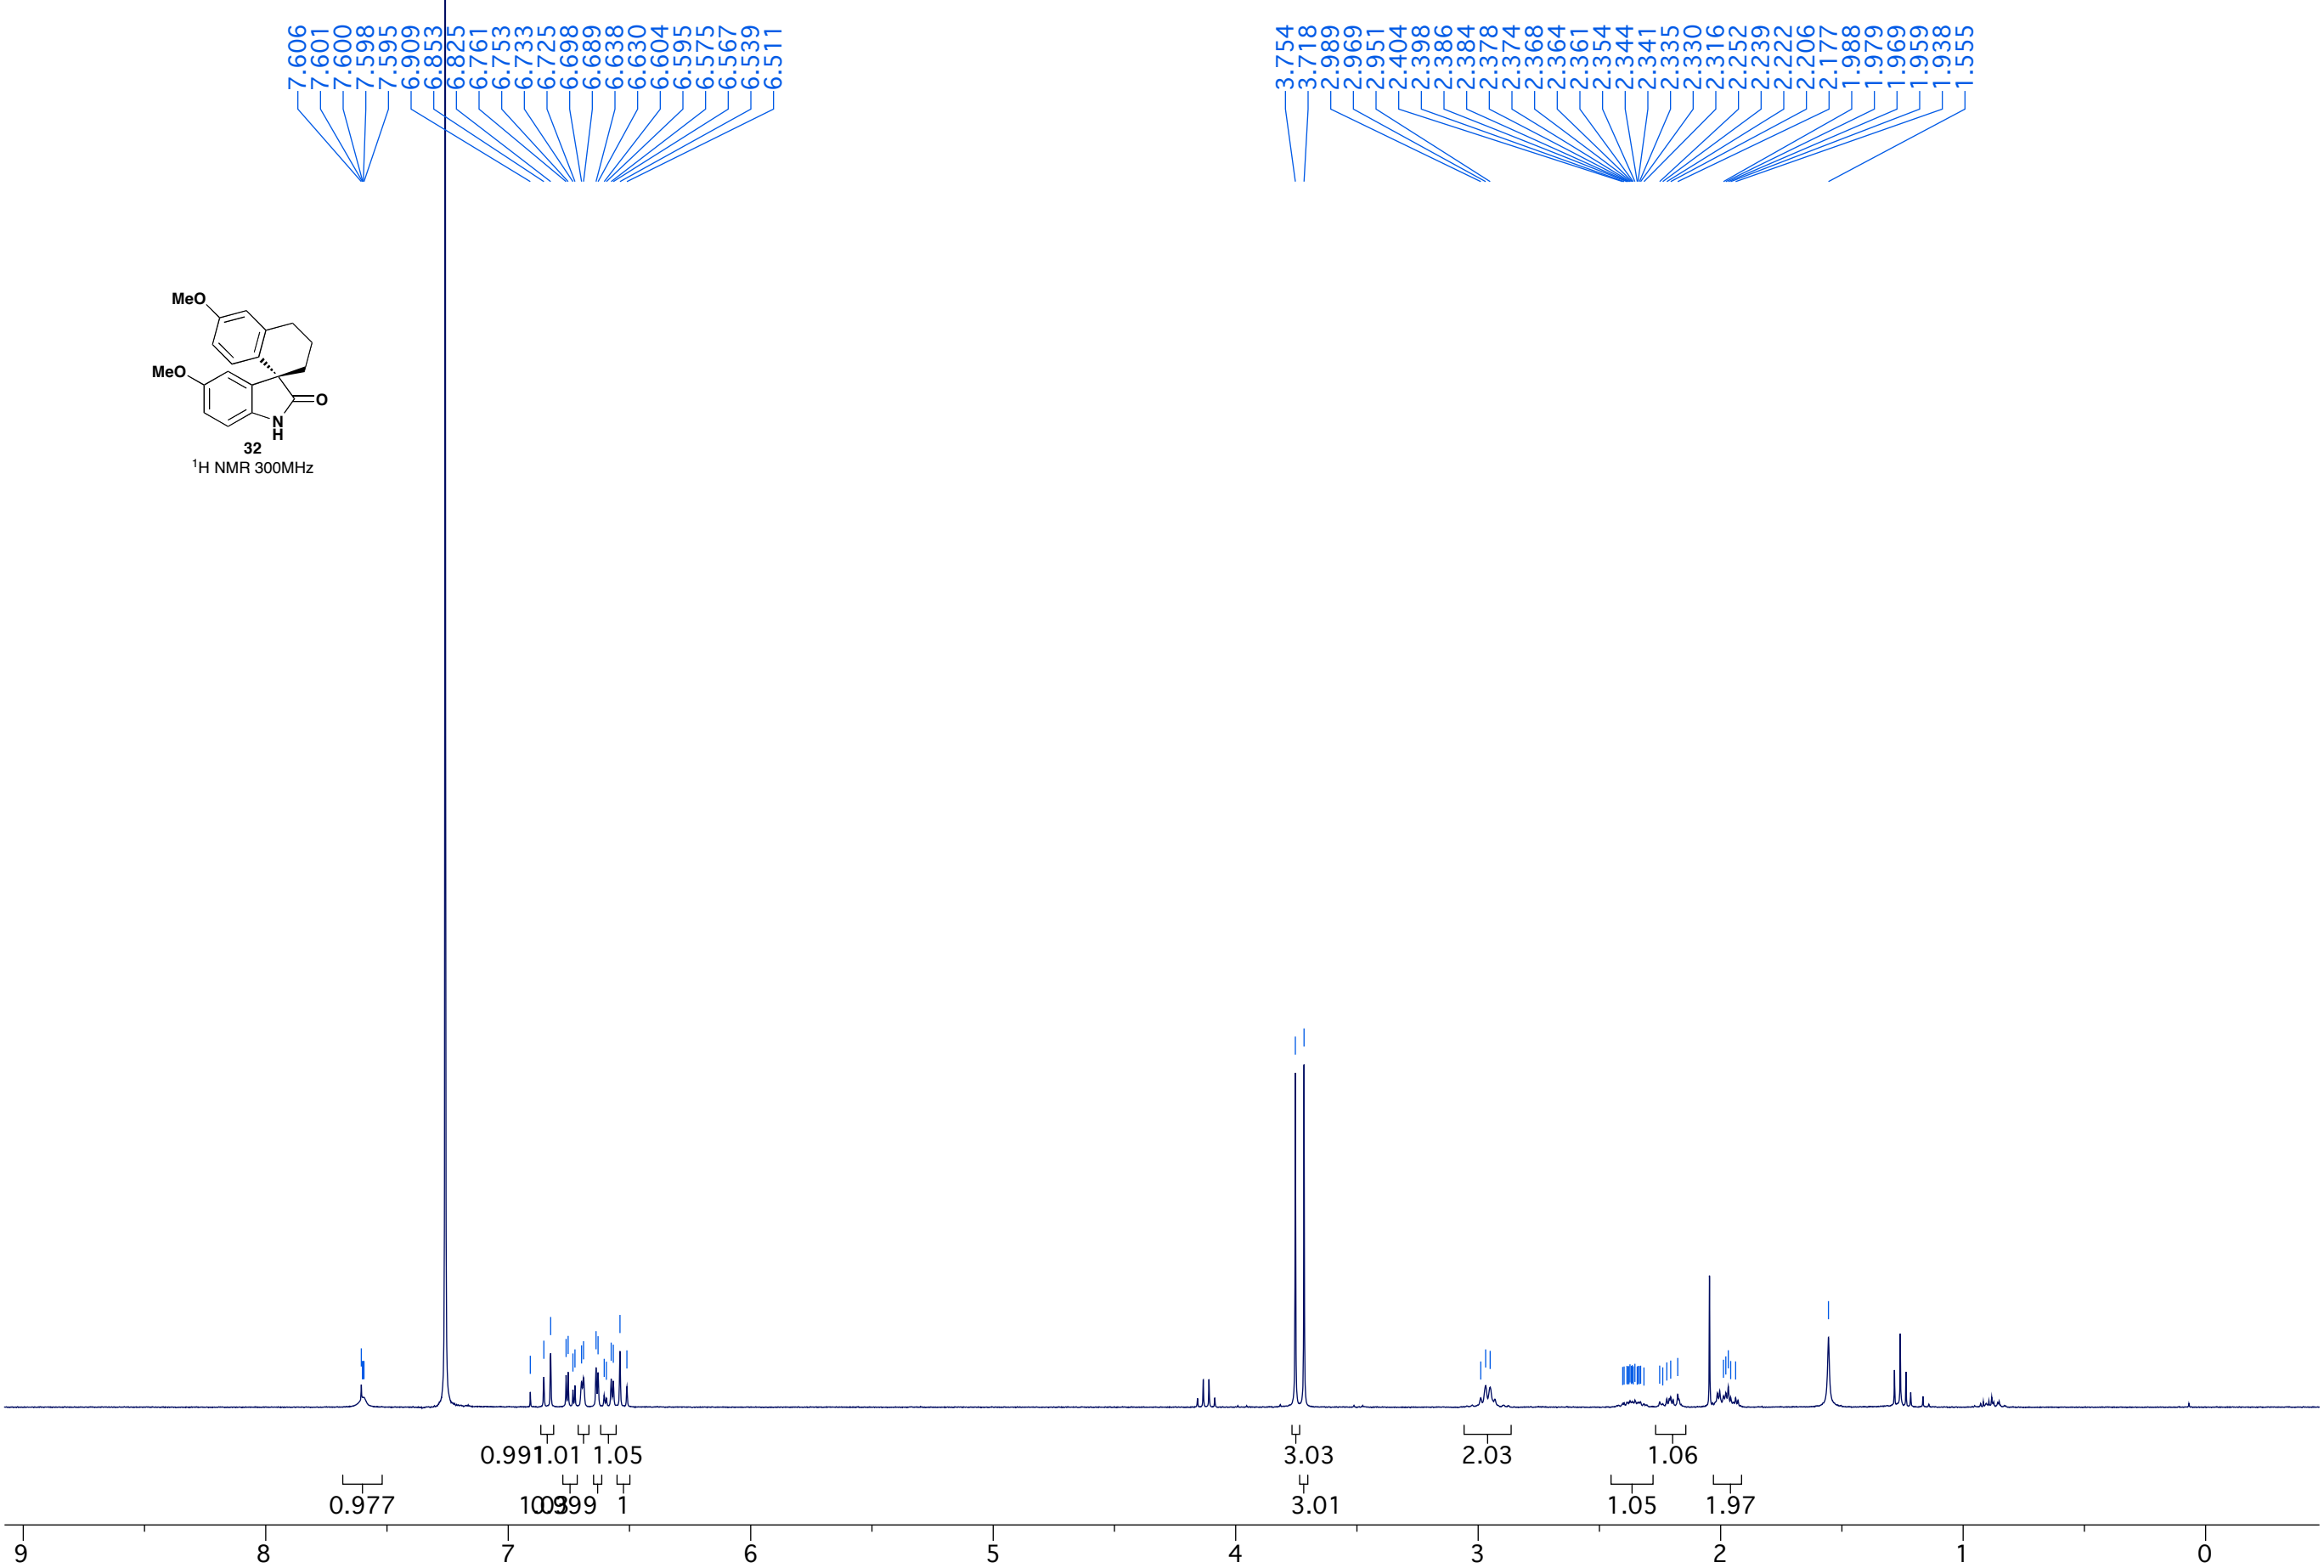

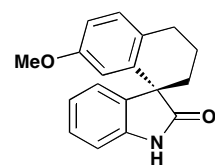

33

$^{13}\text{C}$  NMR 125MHz

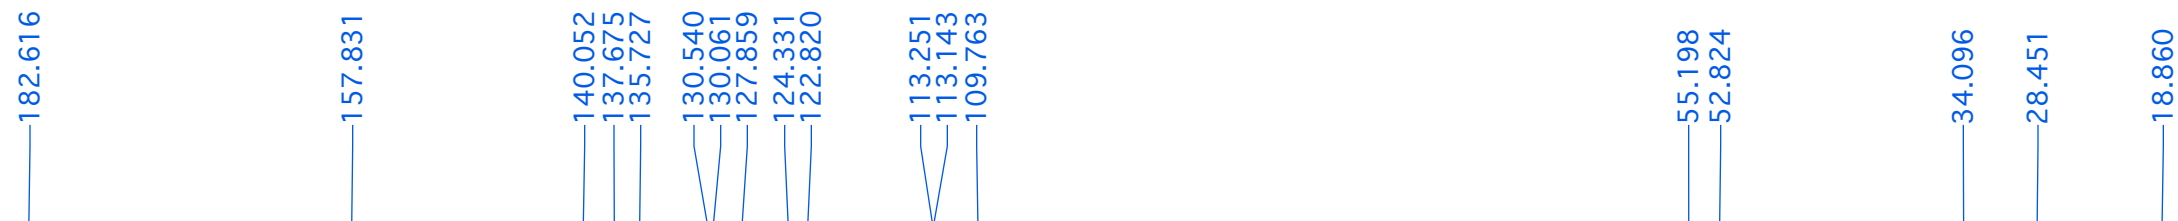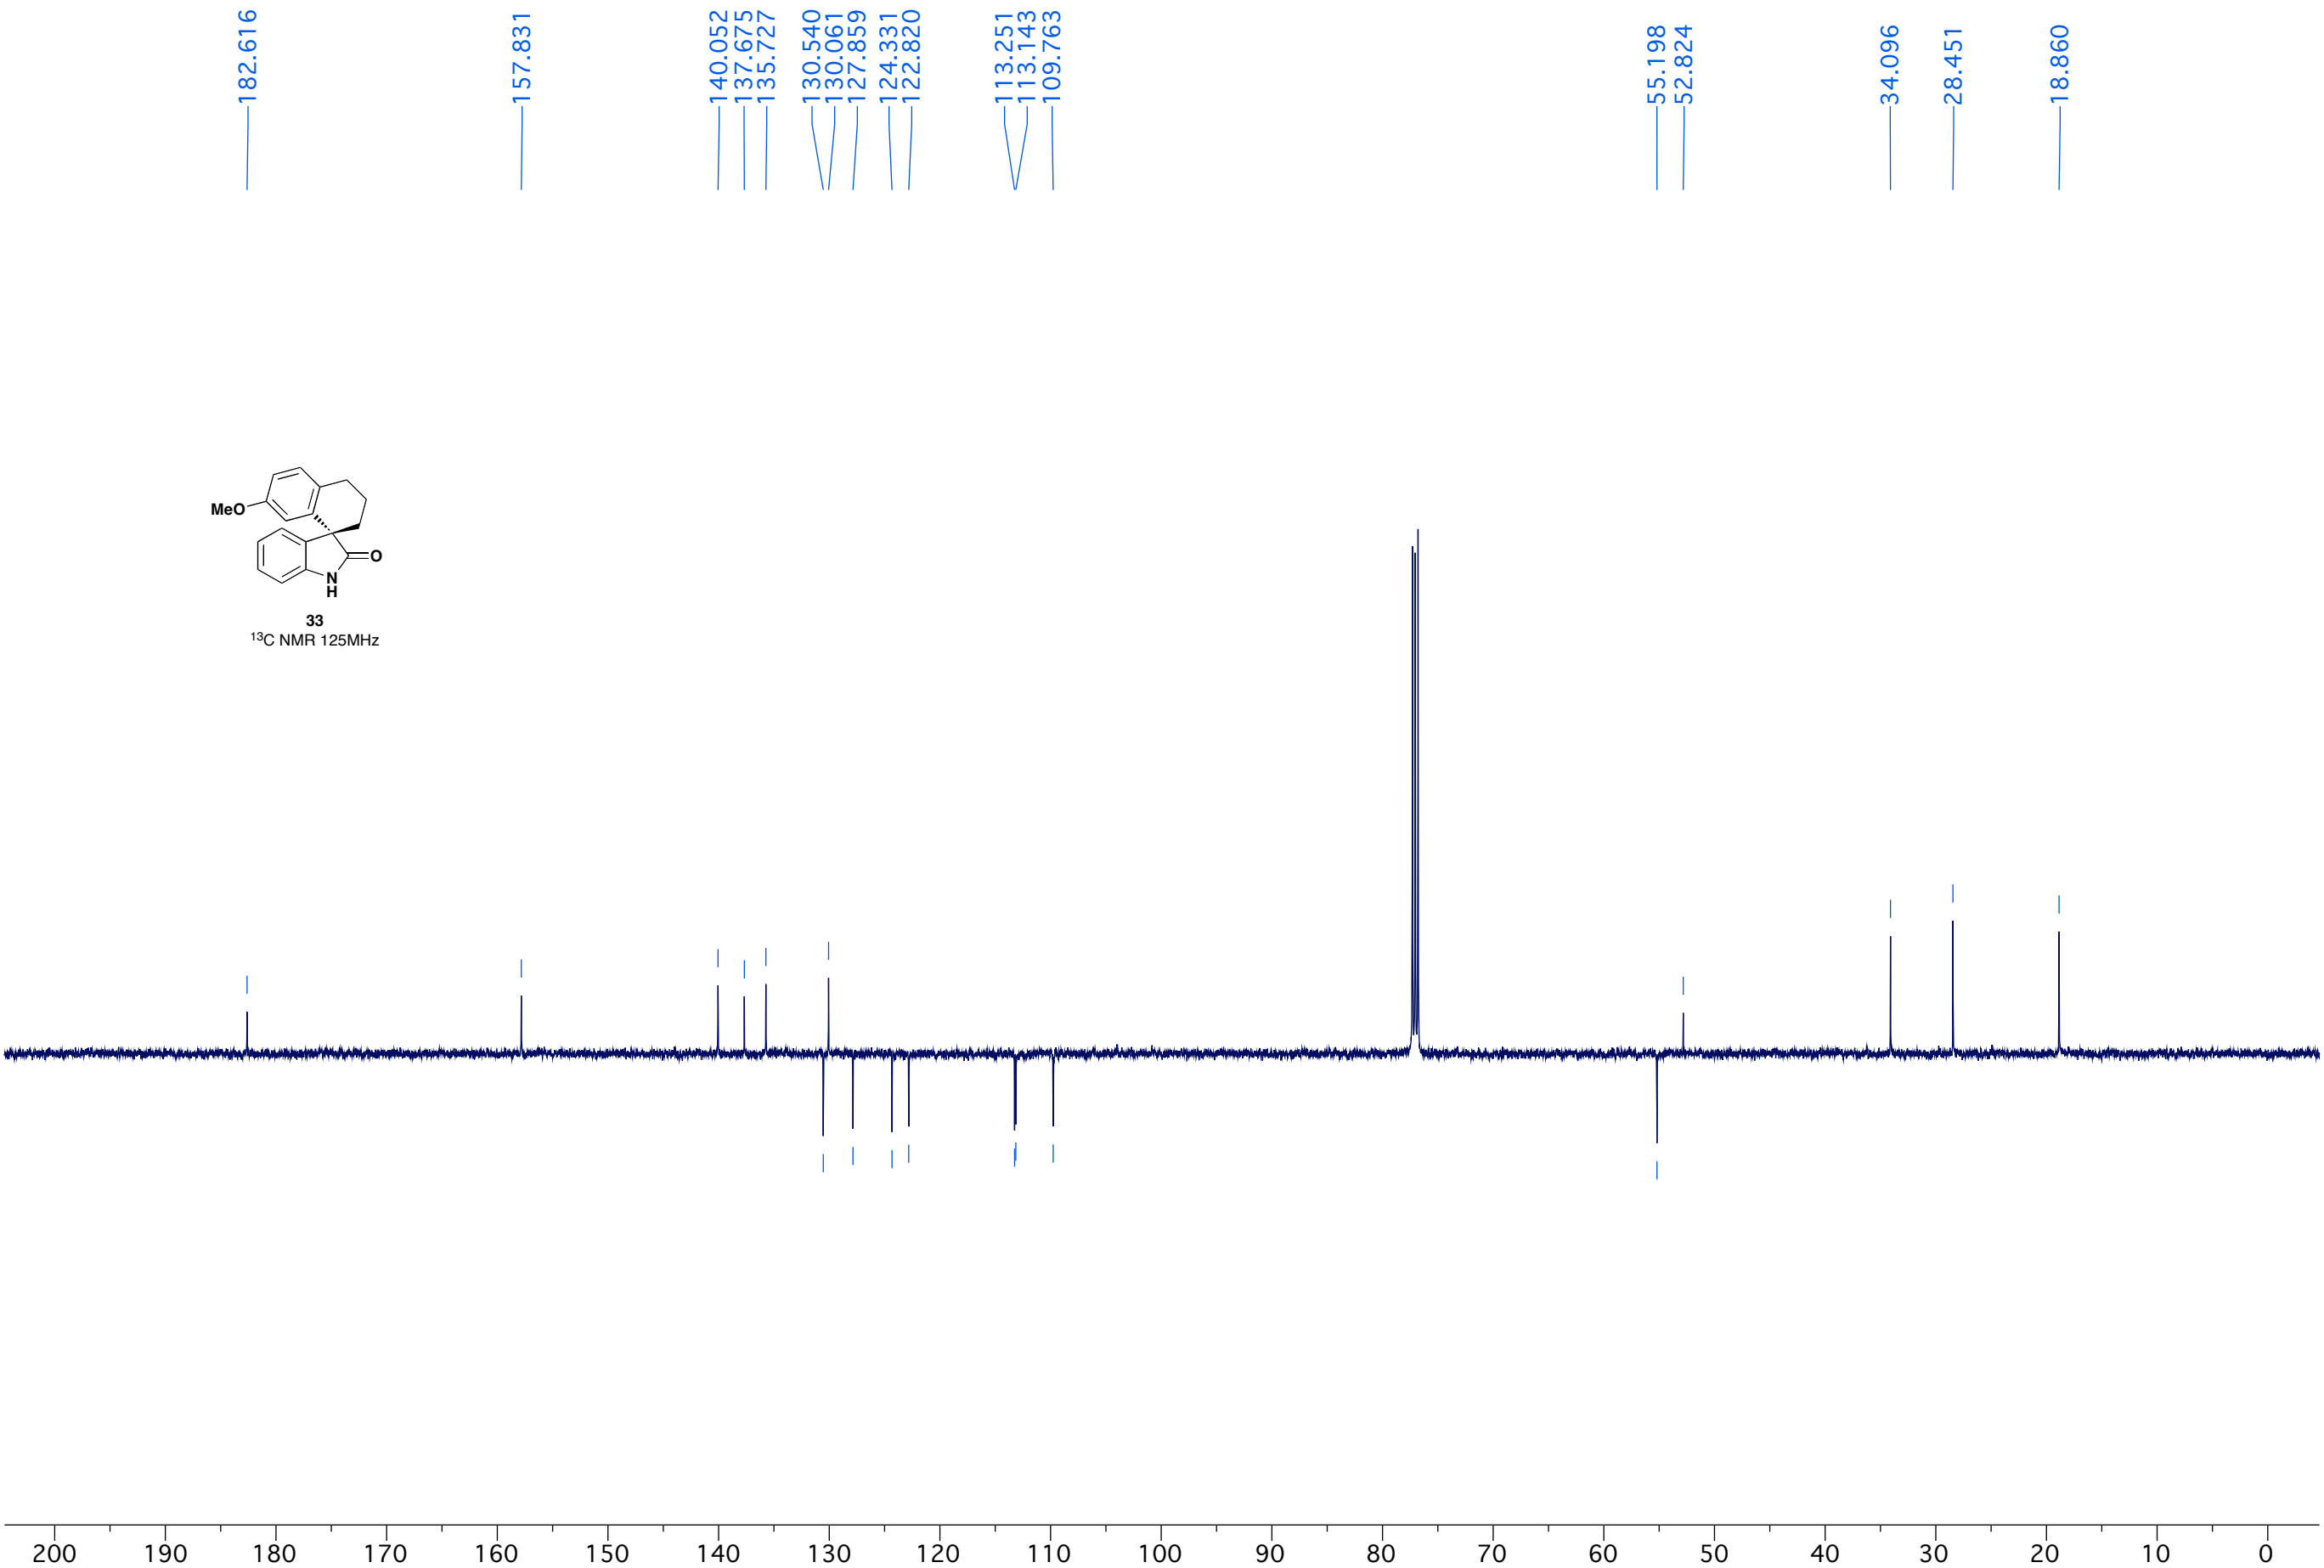

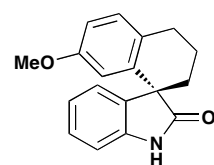

33

<sup>1</sup>H NMR 300MHz

7.674  
7.191  
7.171  
7.166  
7.146  
7.141  
7.120  
7.115  
7.047  
7.028  
7.018  
6.994  
6.989  
6.969  
6.967  
6.964  
6.937  
6.933  
6.912  
6.908  
6.887  
6.883  
6.876  
6.851  
6.680  
6.671  
6.642  
6.057  
6.048

3.538  
2.917  
2.914  
2.912  
2.911  
2.894  
2.892  
2.891  
2.880  
2.859  
2.844  
2.824  
2.814  
2.813  
2.789  
2.787  
2.784  
2.771  
2.768  
2.331  
2.324  
2.308  
2.303  
2.292  
2.288  
2.280  
2.273  
2.270  
2.265  
2.258  
2.250  
2.249  
2.246  
2.236  
2.231  
2.229  
2.222  
2.215  
2.211  
2.192  
2.186  
2.184  
2.180  
2.162  
2.151  
2.147  
2.137  
2.117  
2.111  
2.105  
1.978  
1.955  
1.946  
1.934  
1.931  
1.922  
1.912  
1.901  
1.882  
1.872

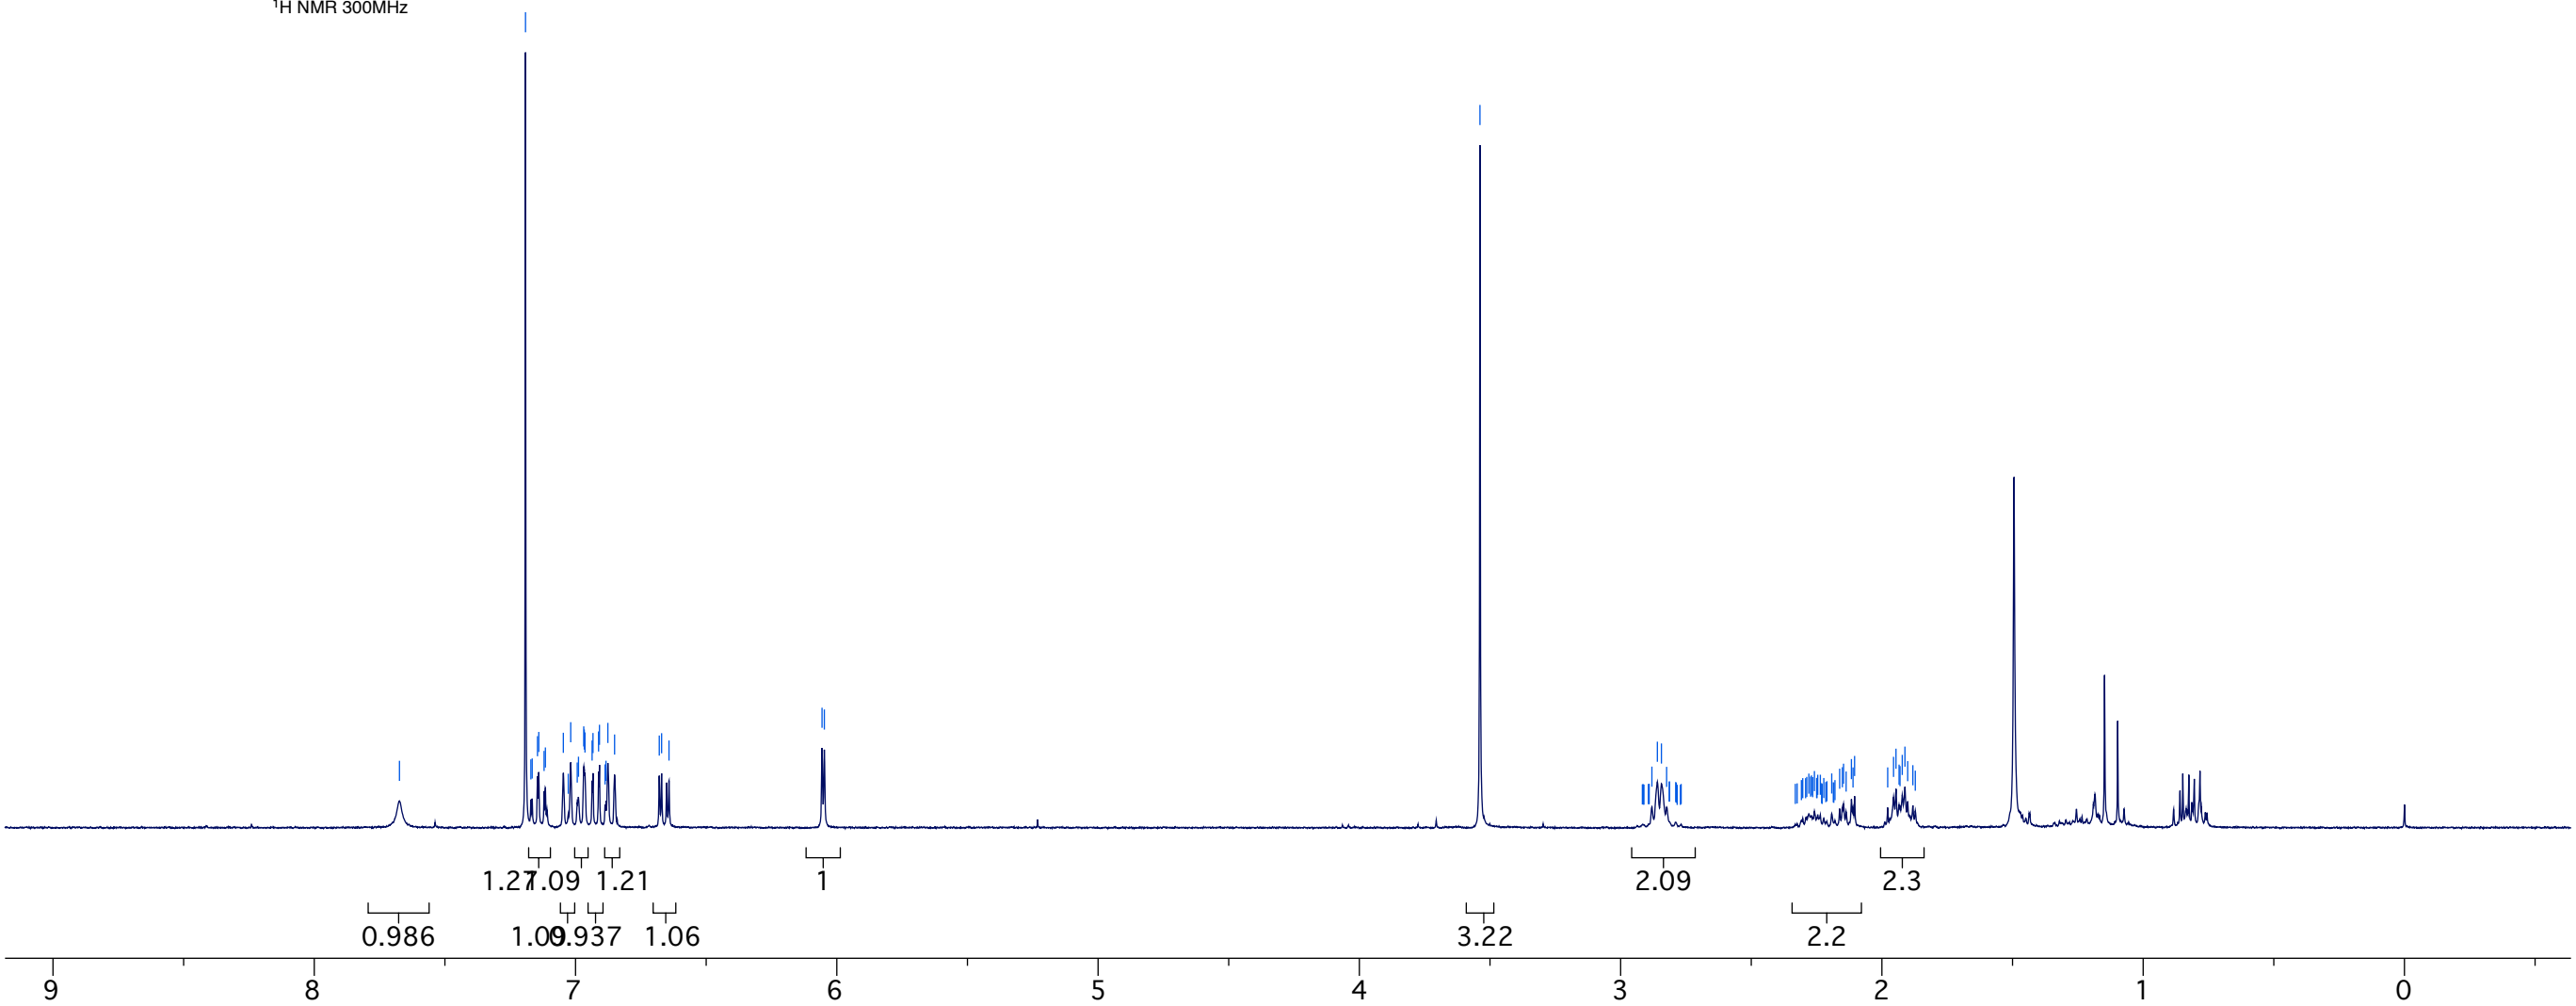



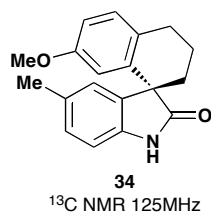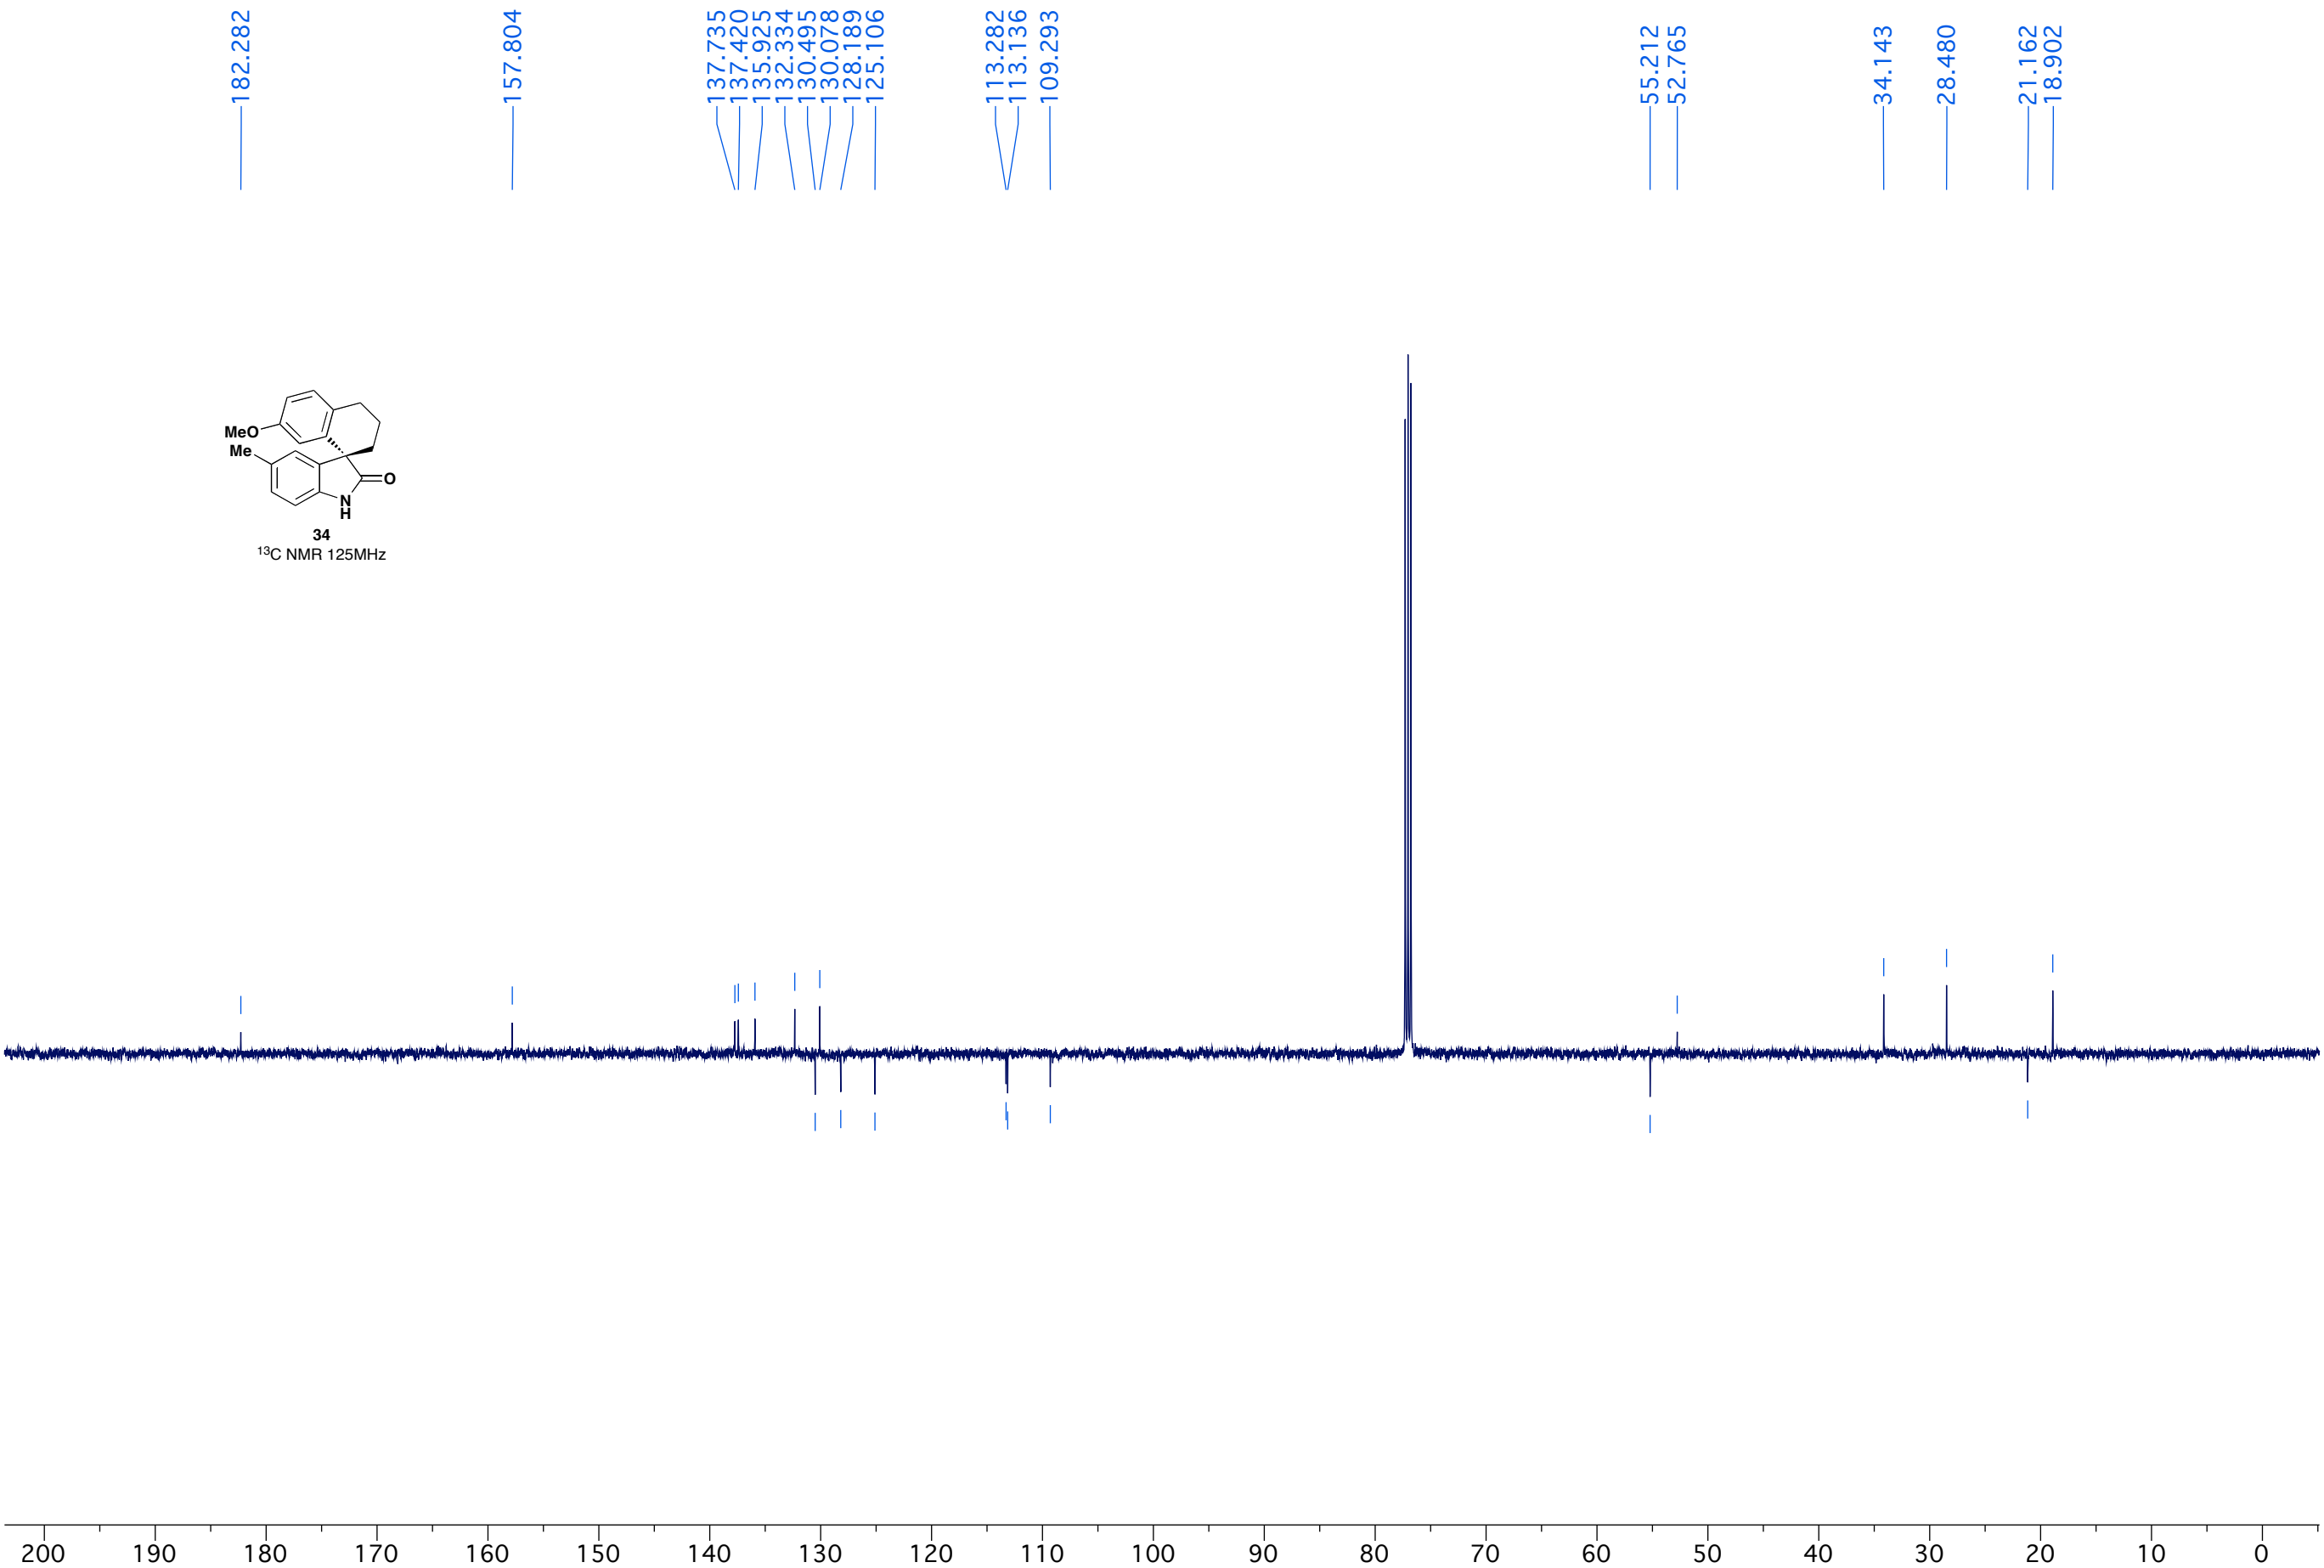

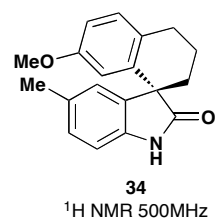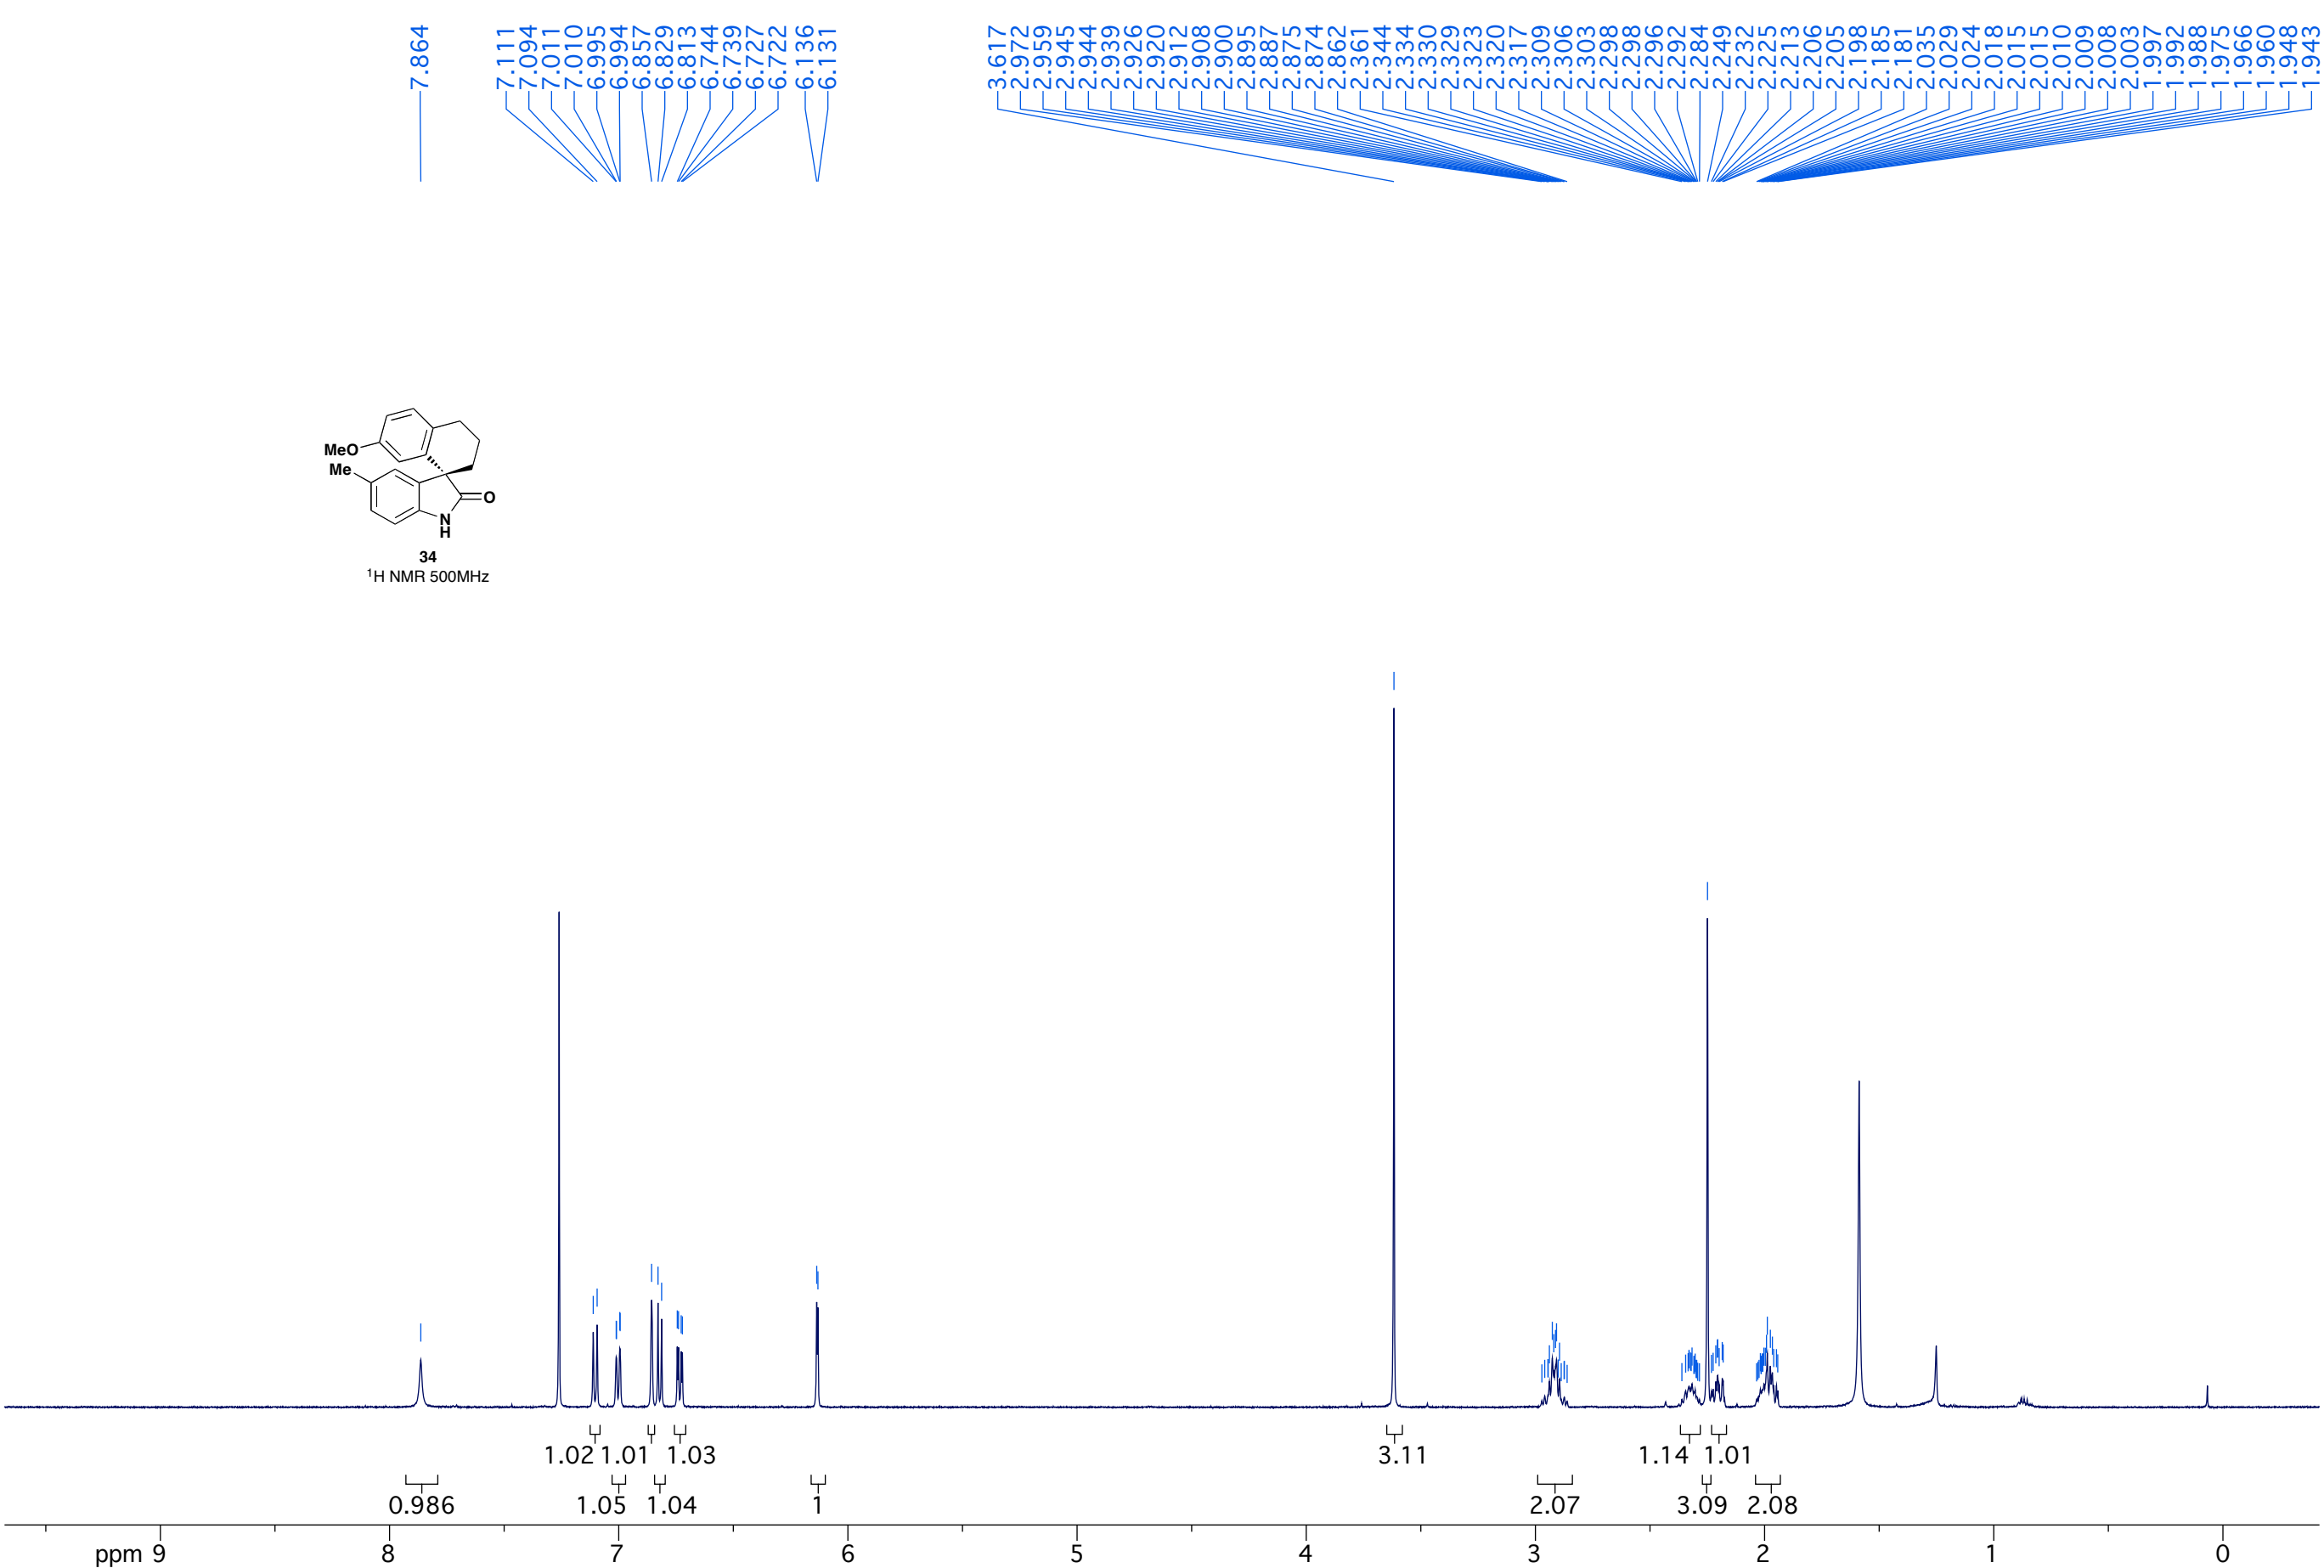

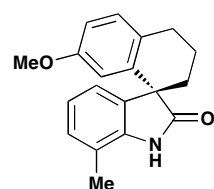

35

<sup>13</sup>C NMR 125MHz

183.035

157.790

138.913

137.297

135.940

130.466

130.026

129.158

122.717

121.657

119.102

113.233

113.085

55.207

53.212

34.111

28.466

18.809

16.593

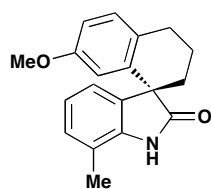

**35**  
<sup>1</sup>H NMR 500MHz

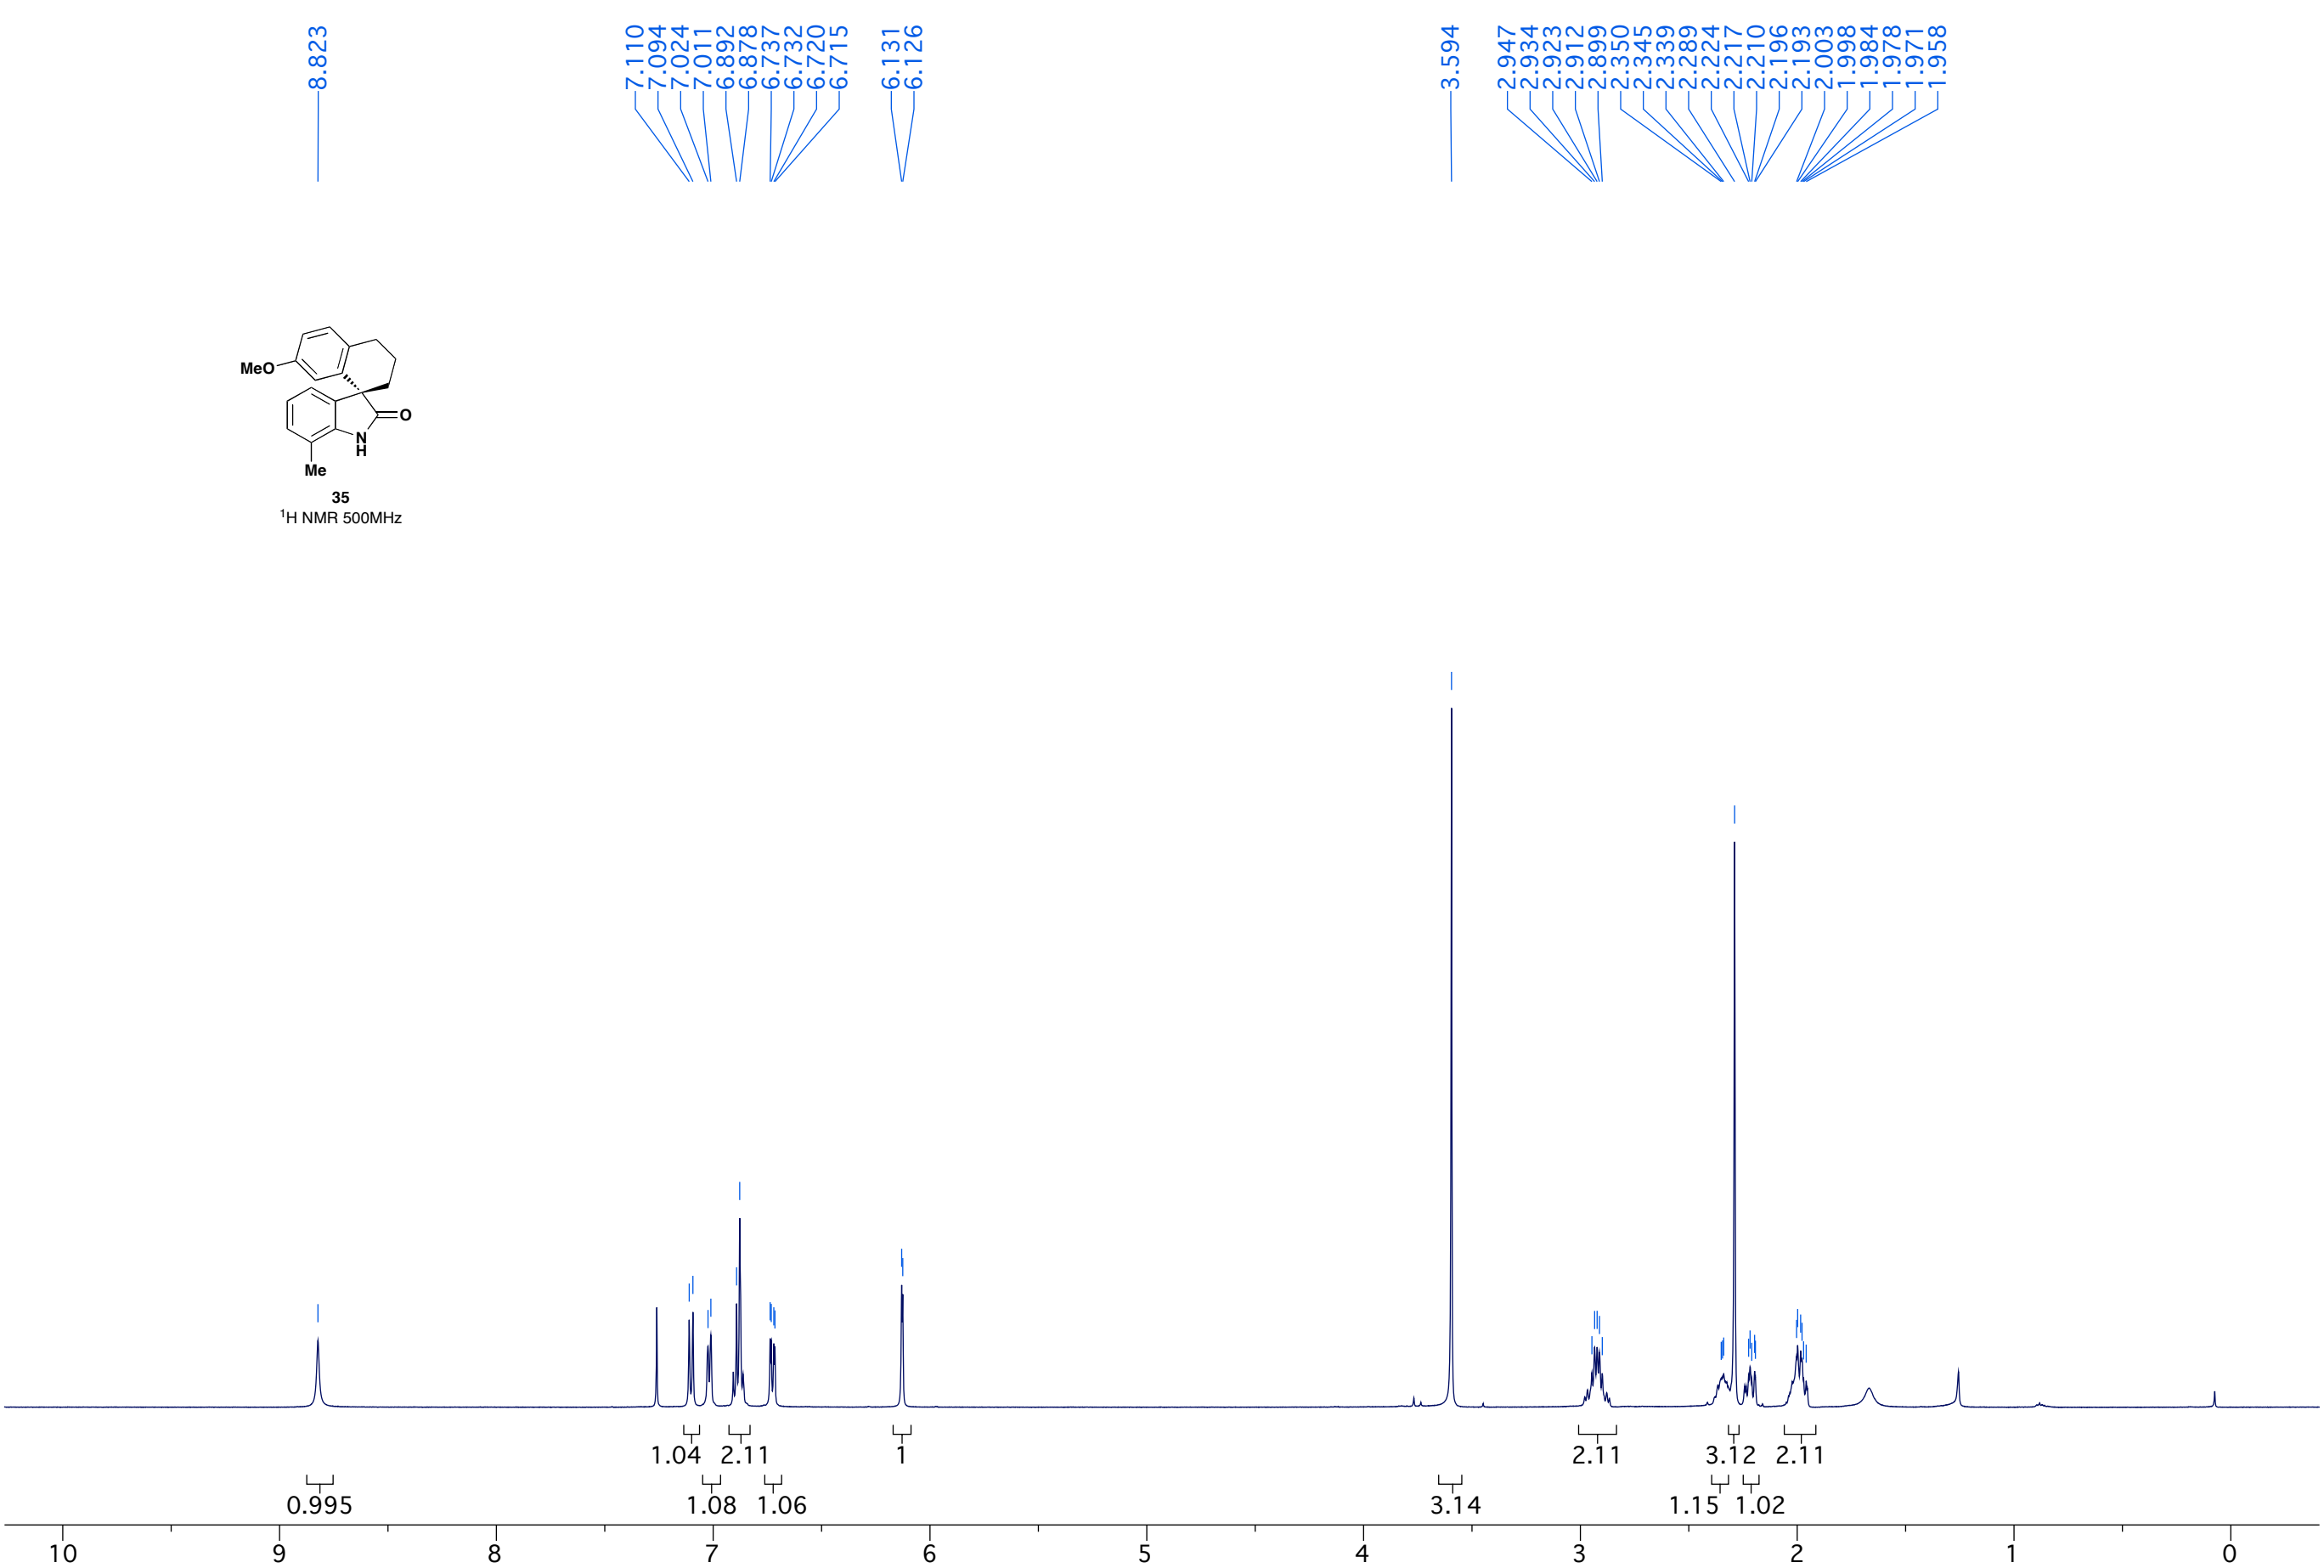

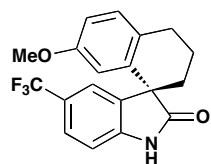

**36**  
<sup>13</sup>C, CDCl<sub>3</sub>, 100 MHz

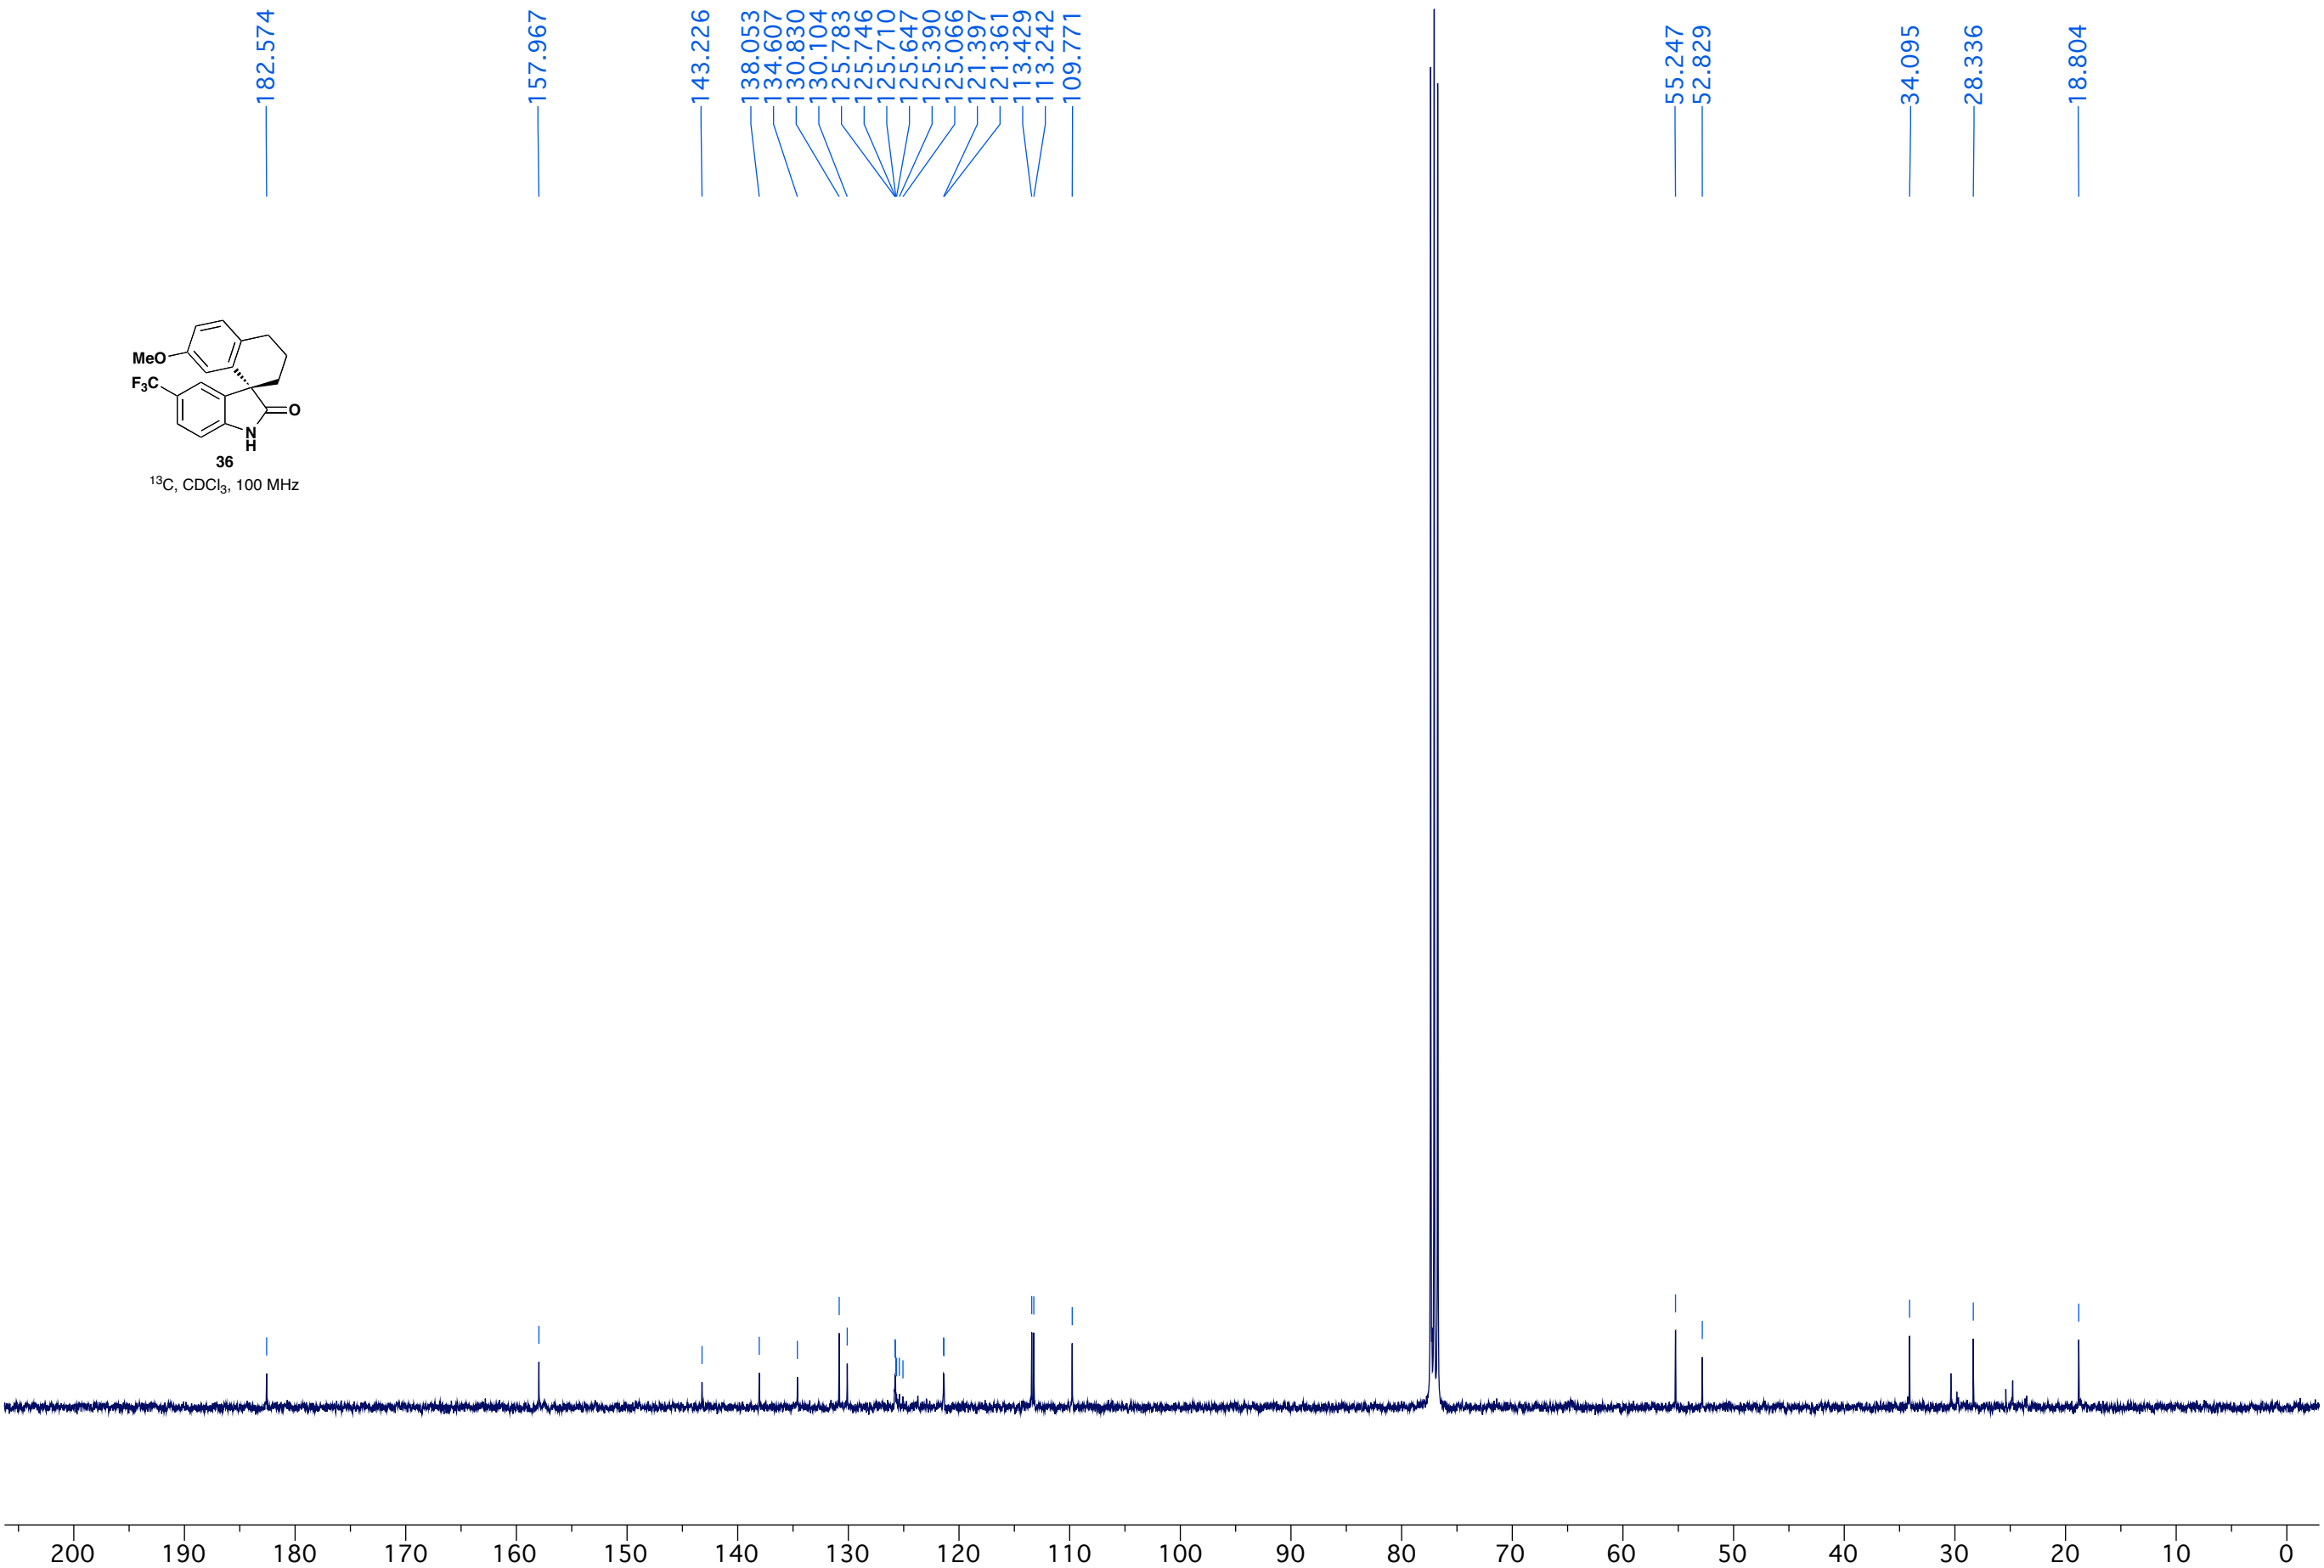

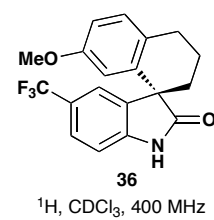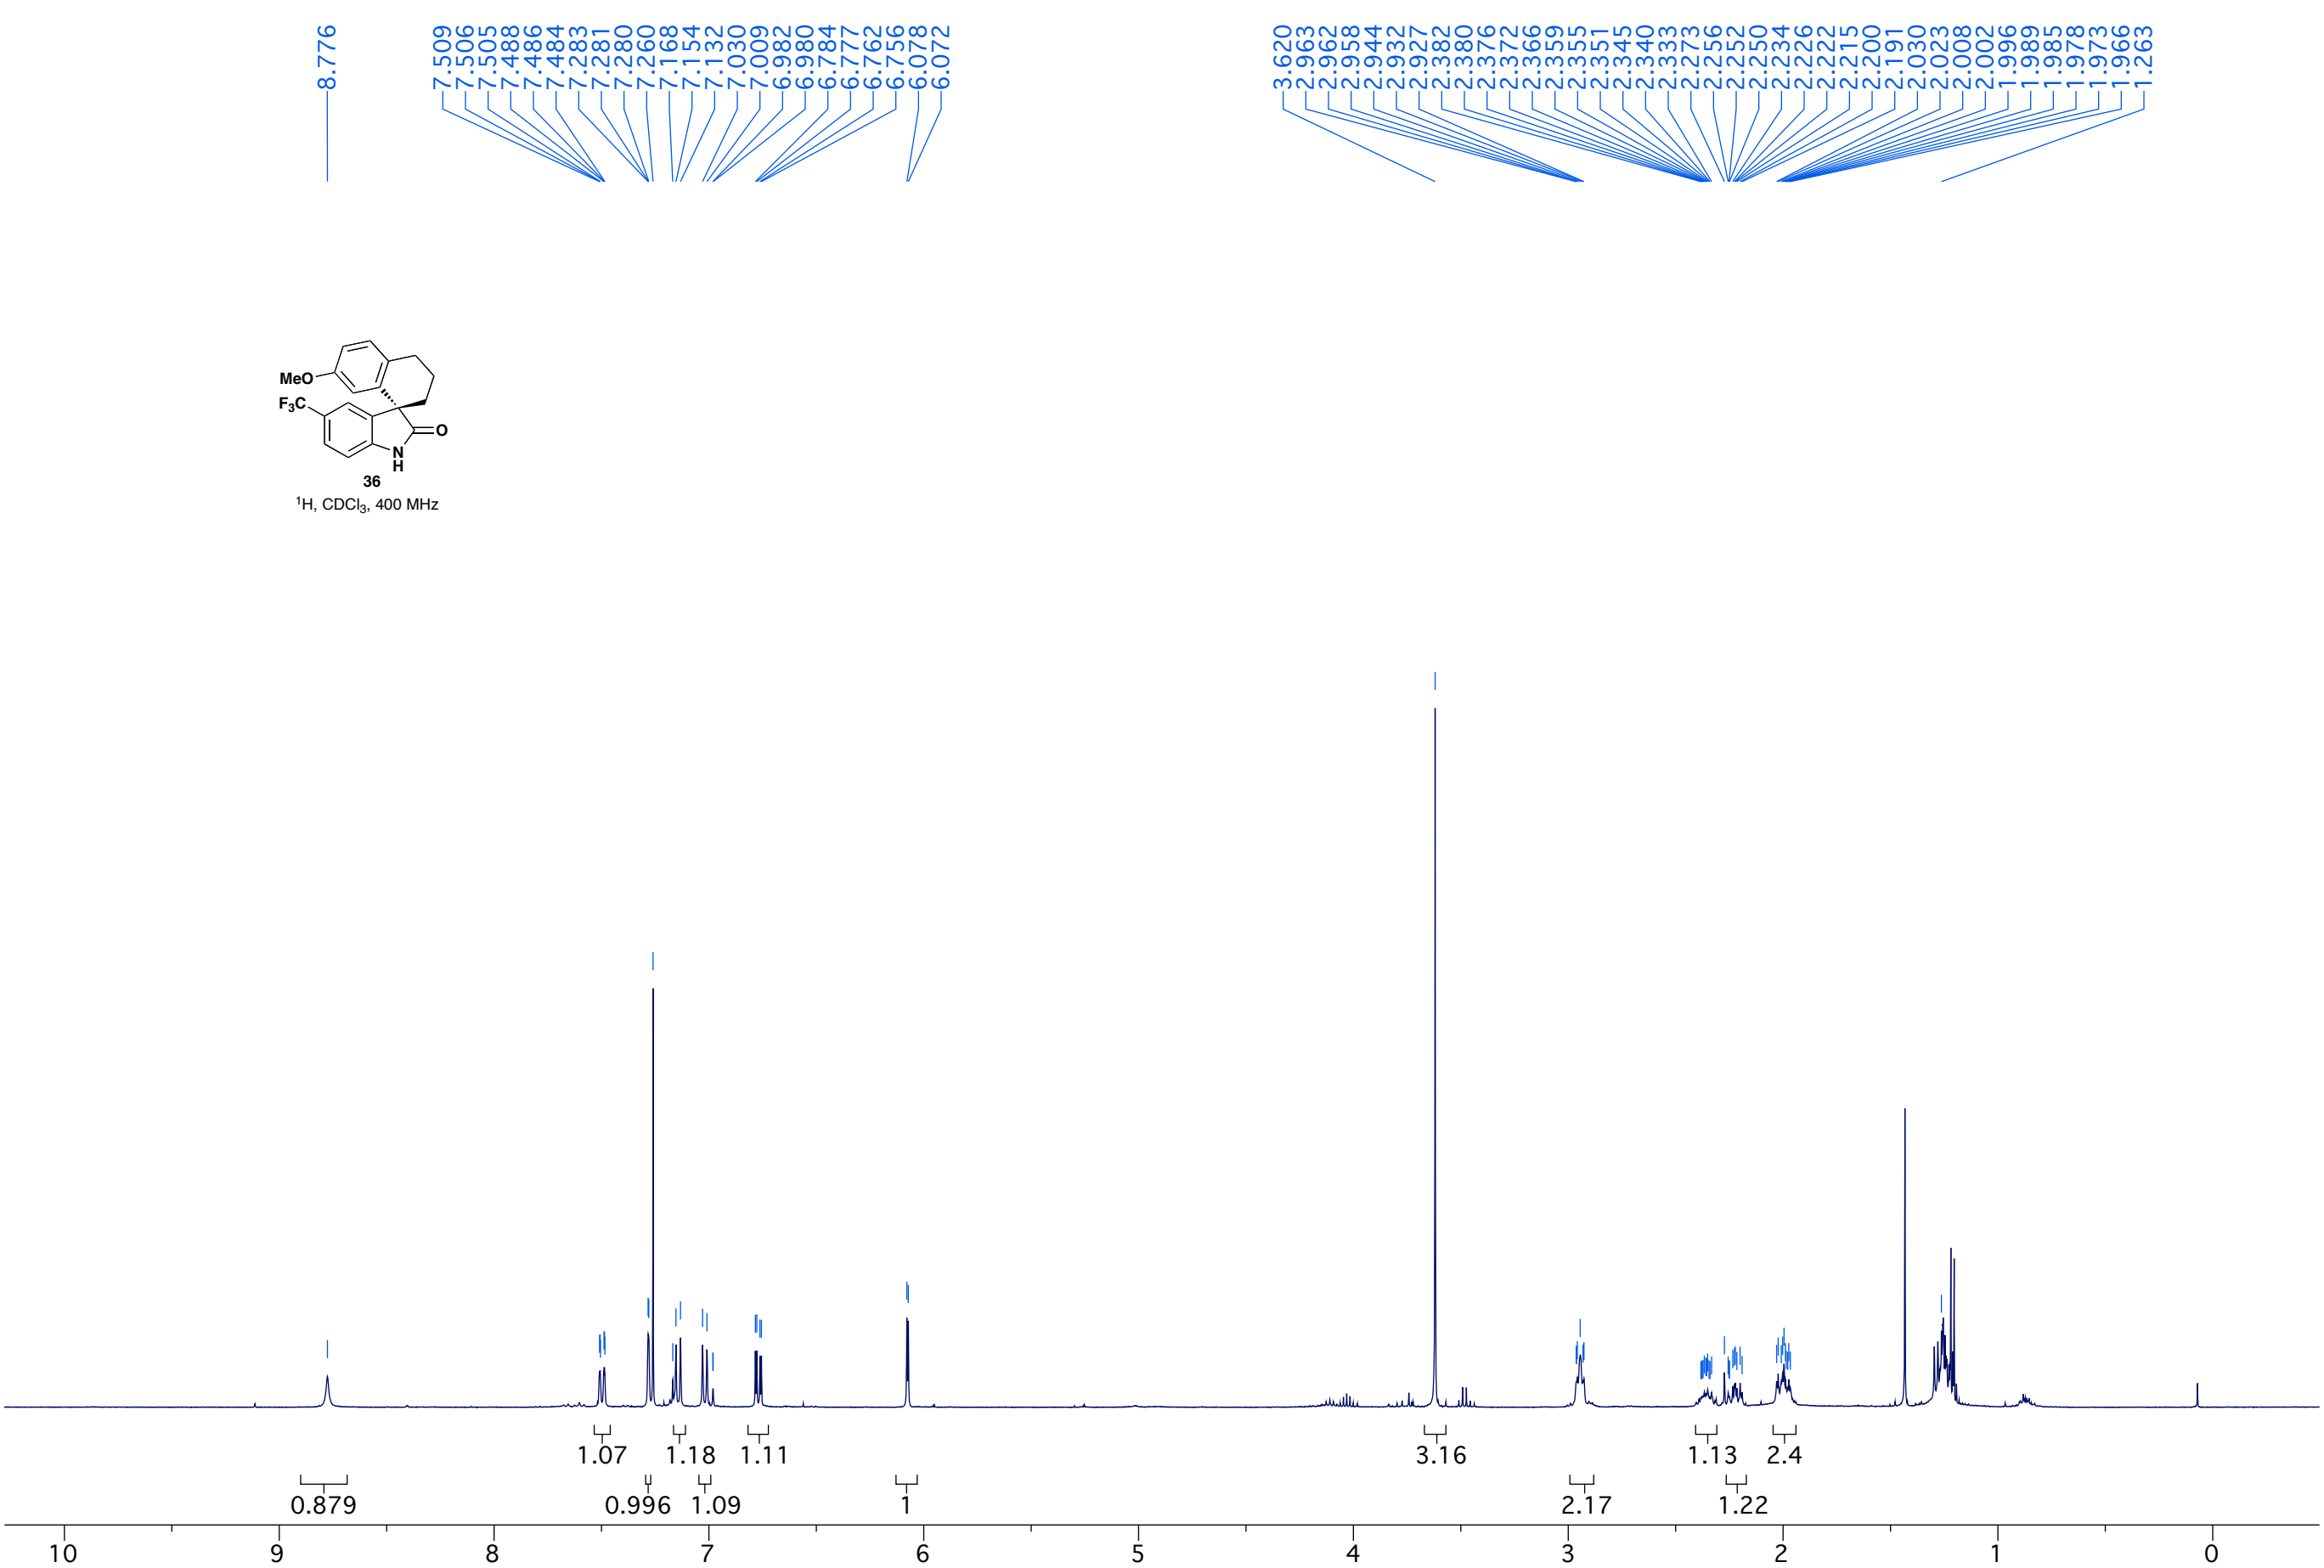

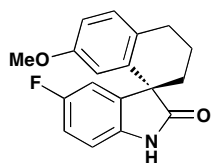

37  
<sup>13</sup>C NMR 125MHz

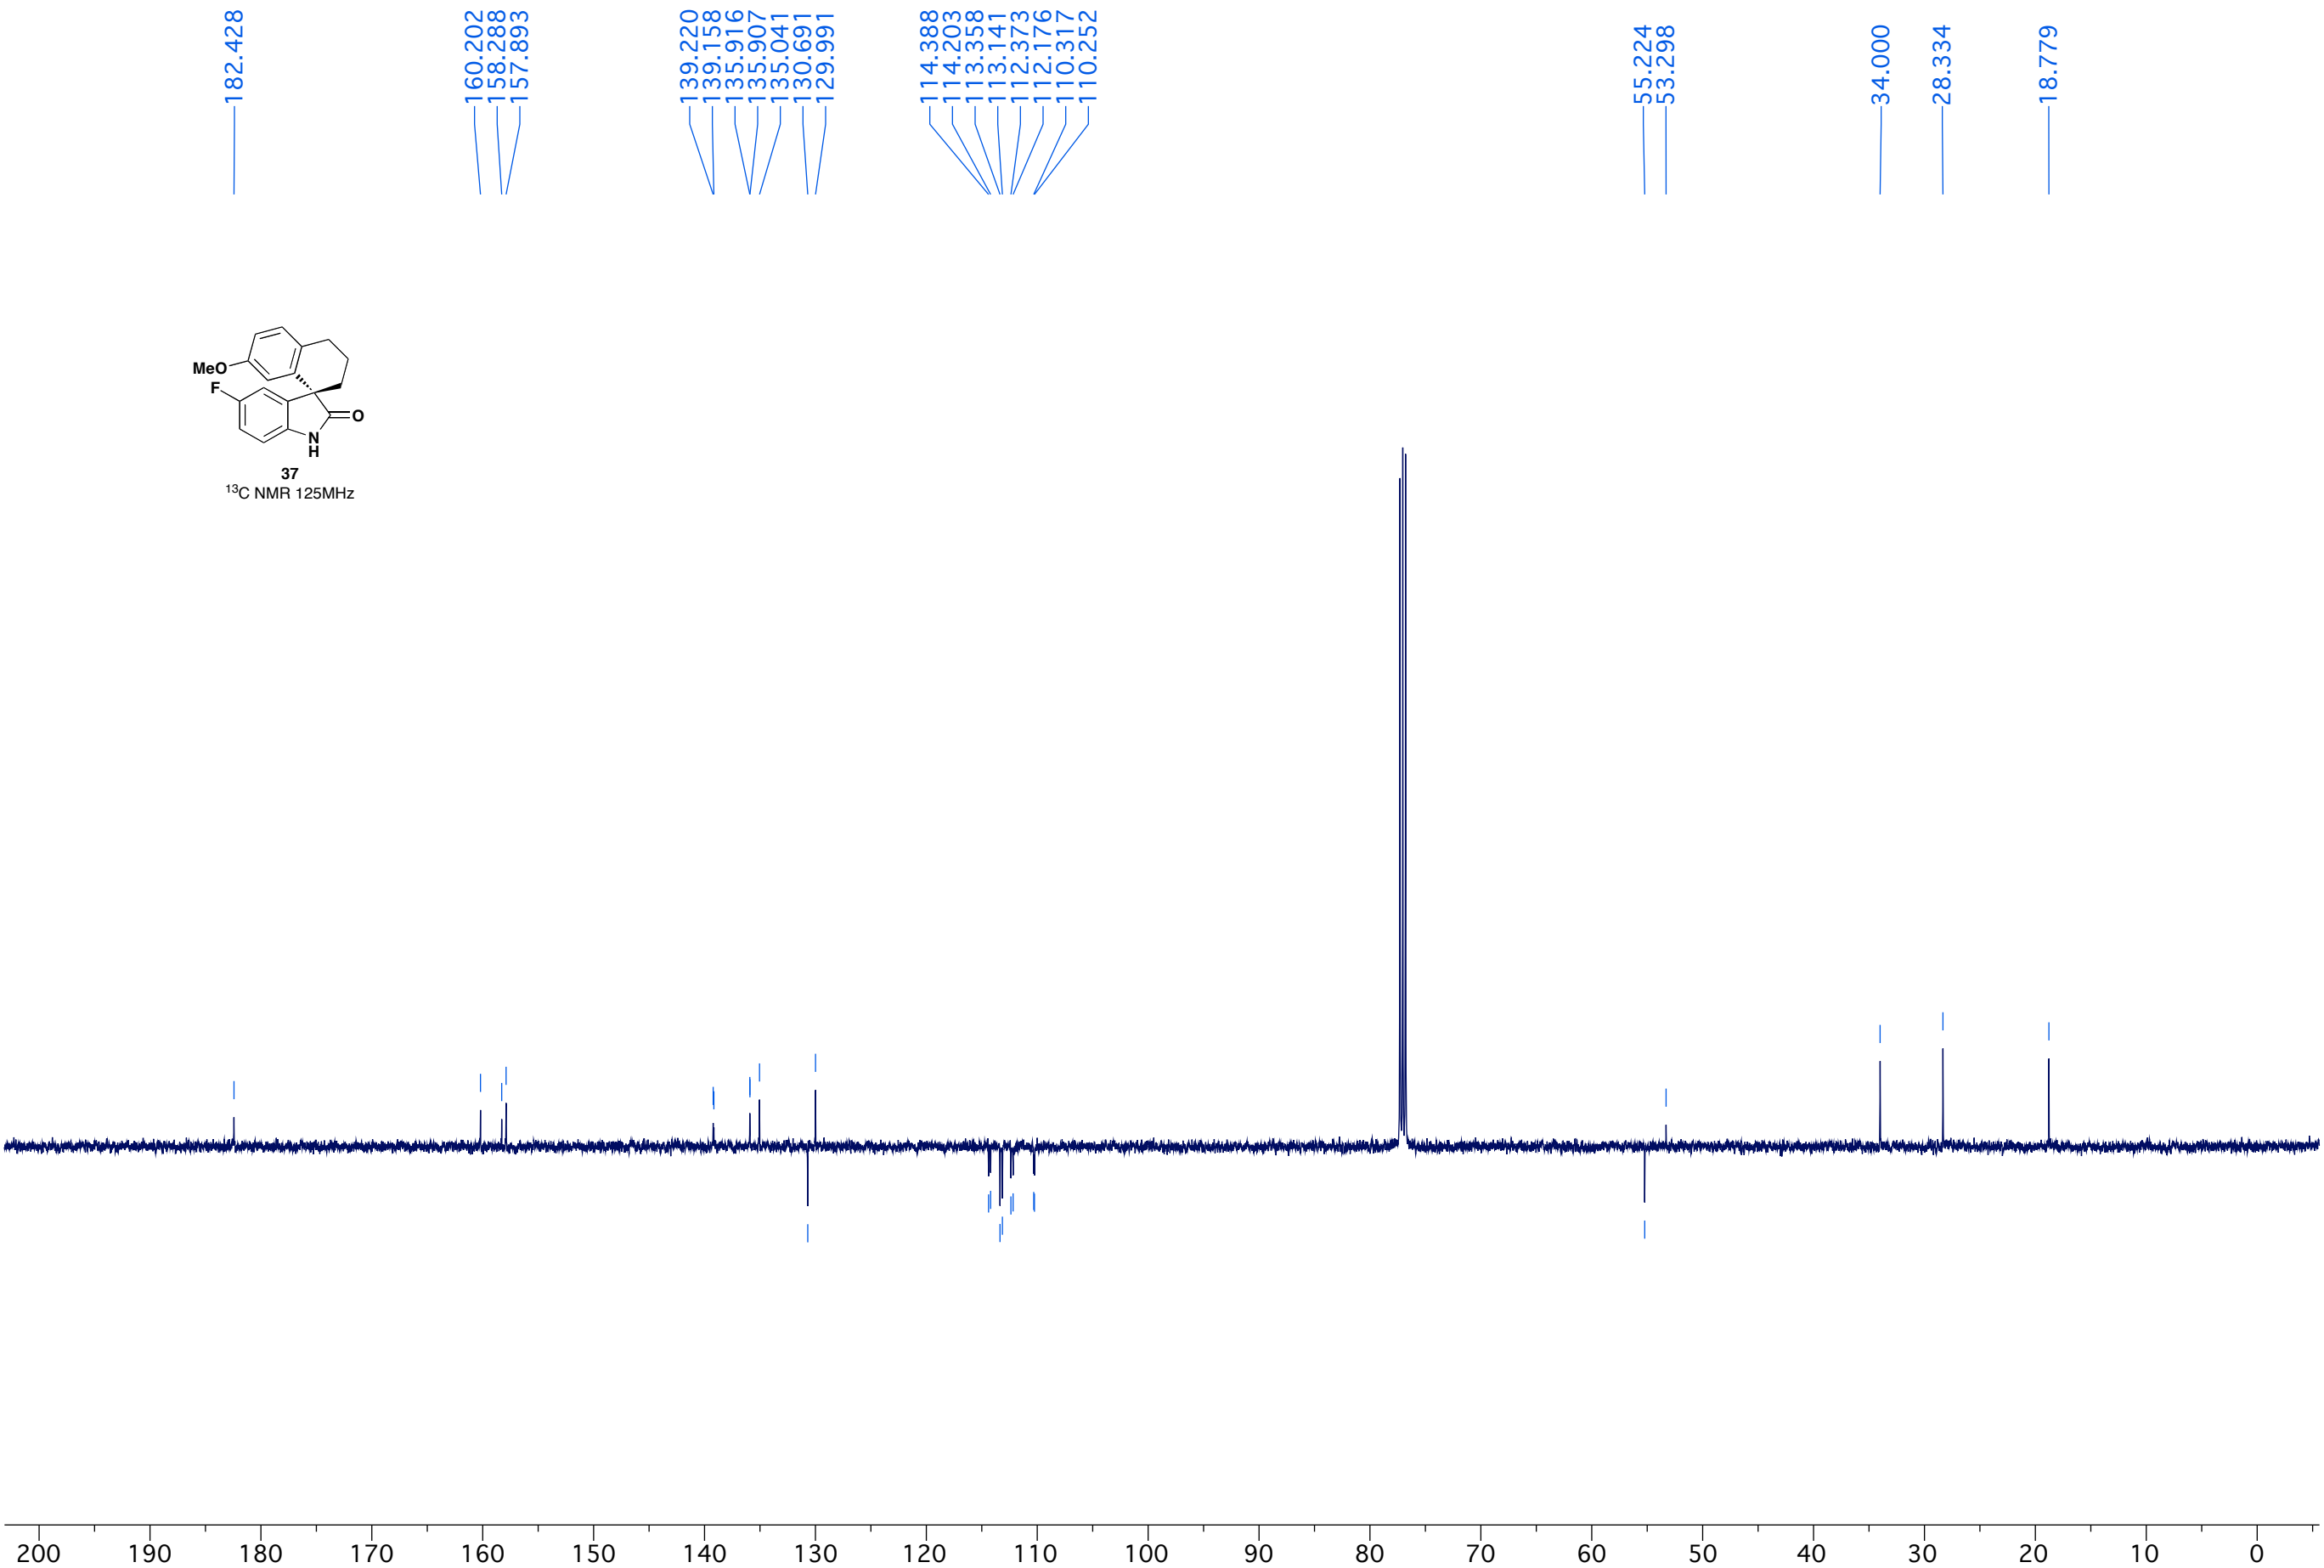

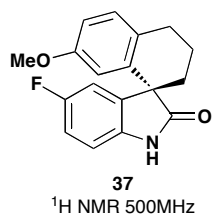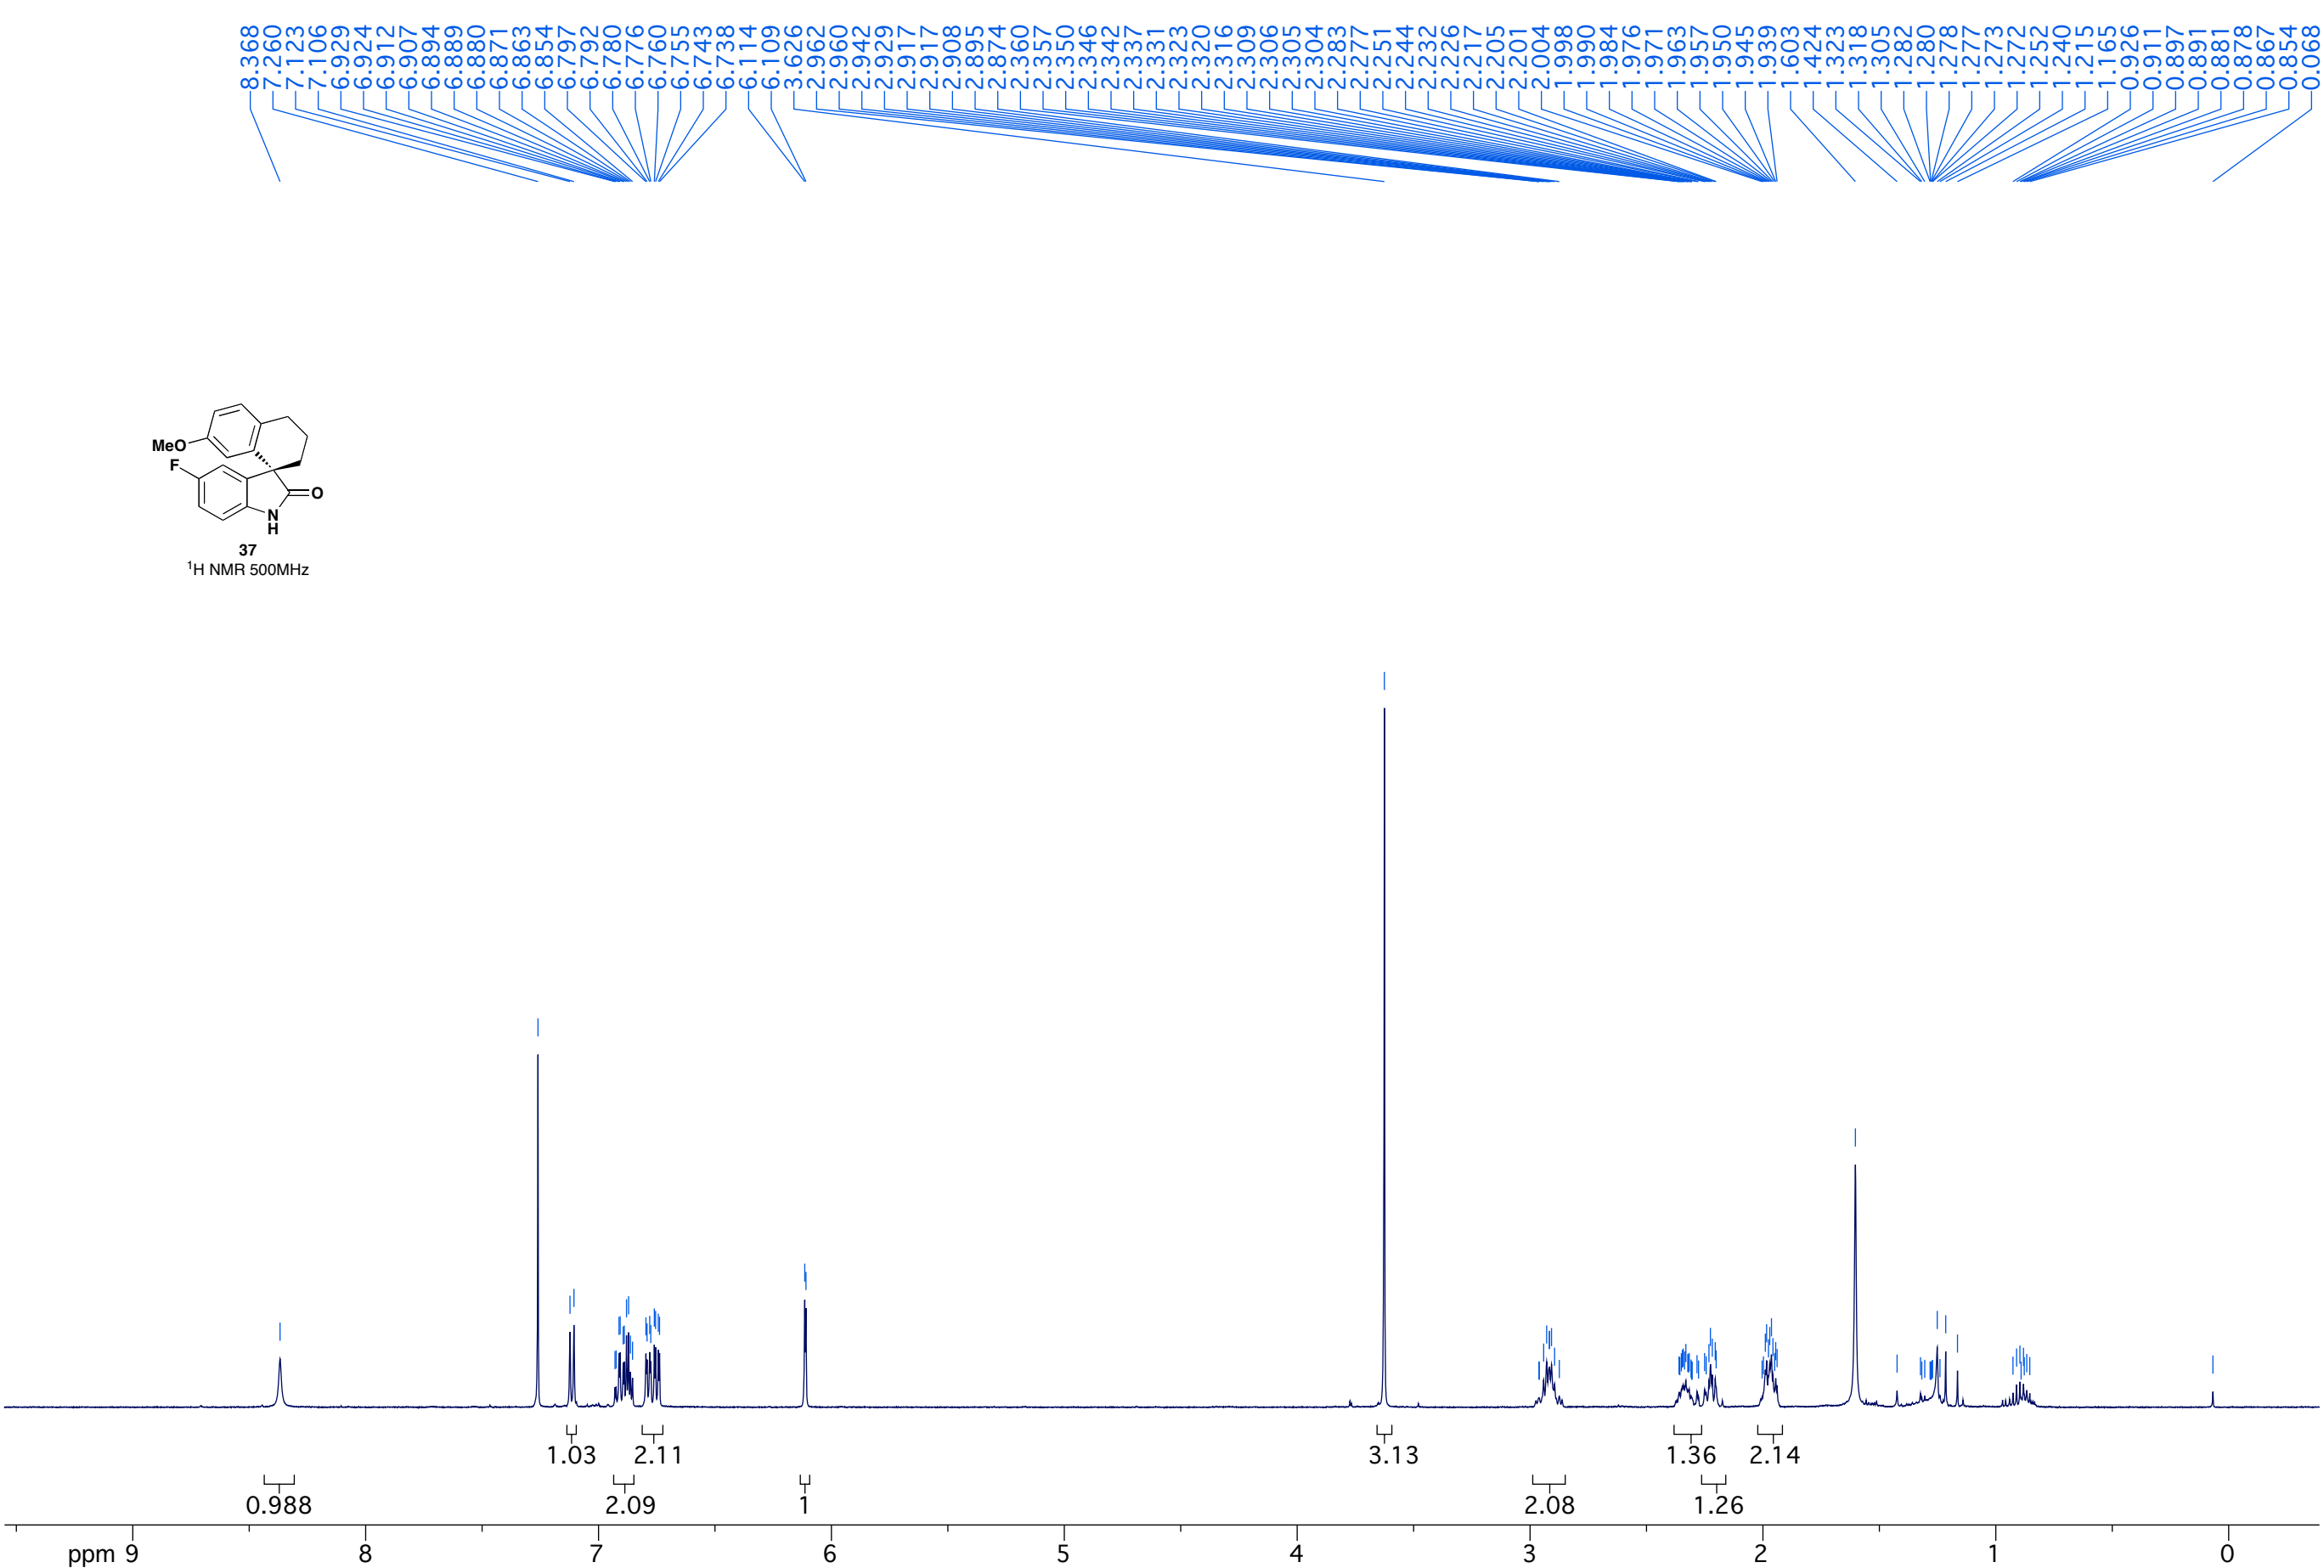



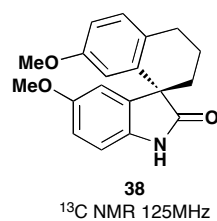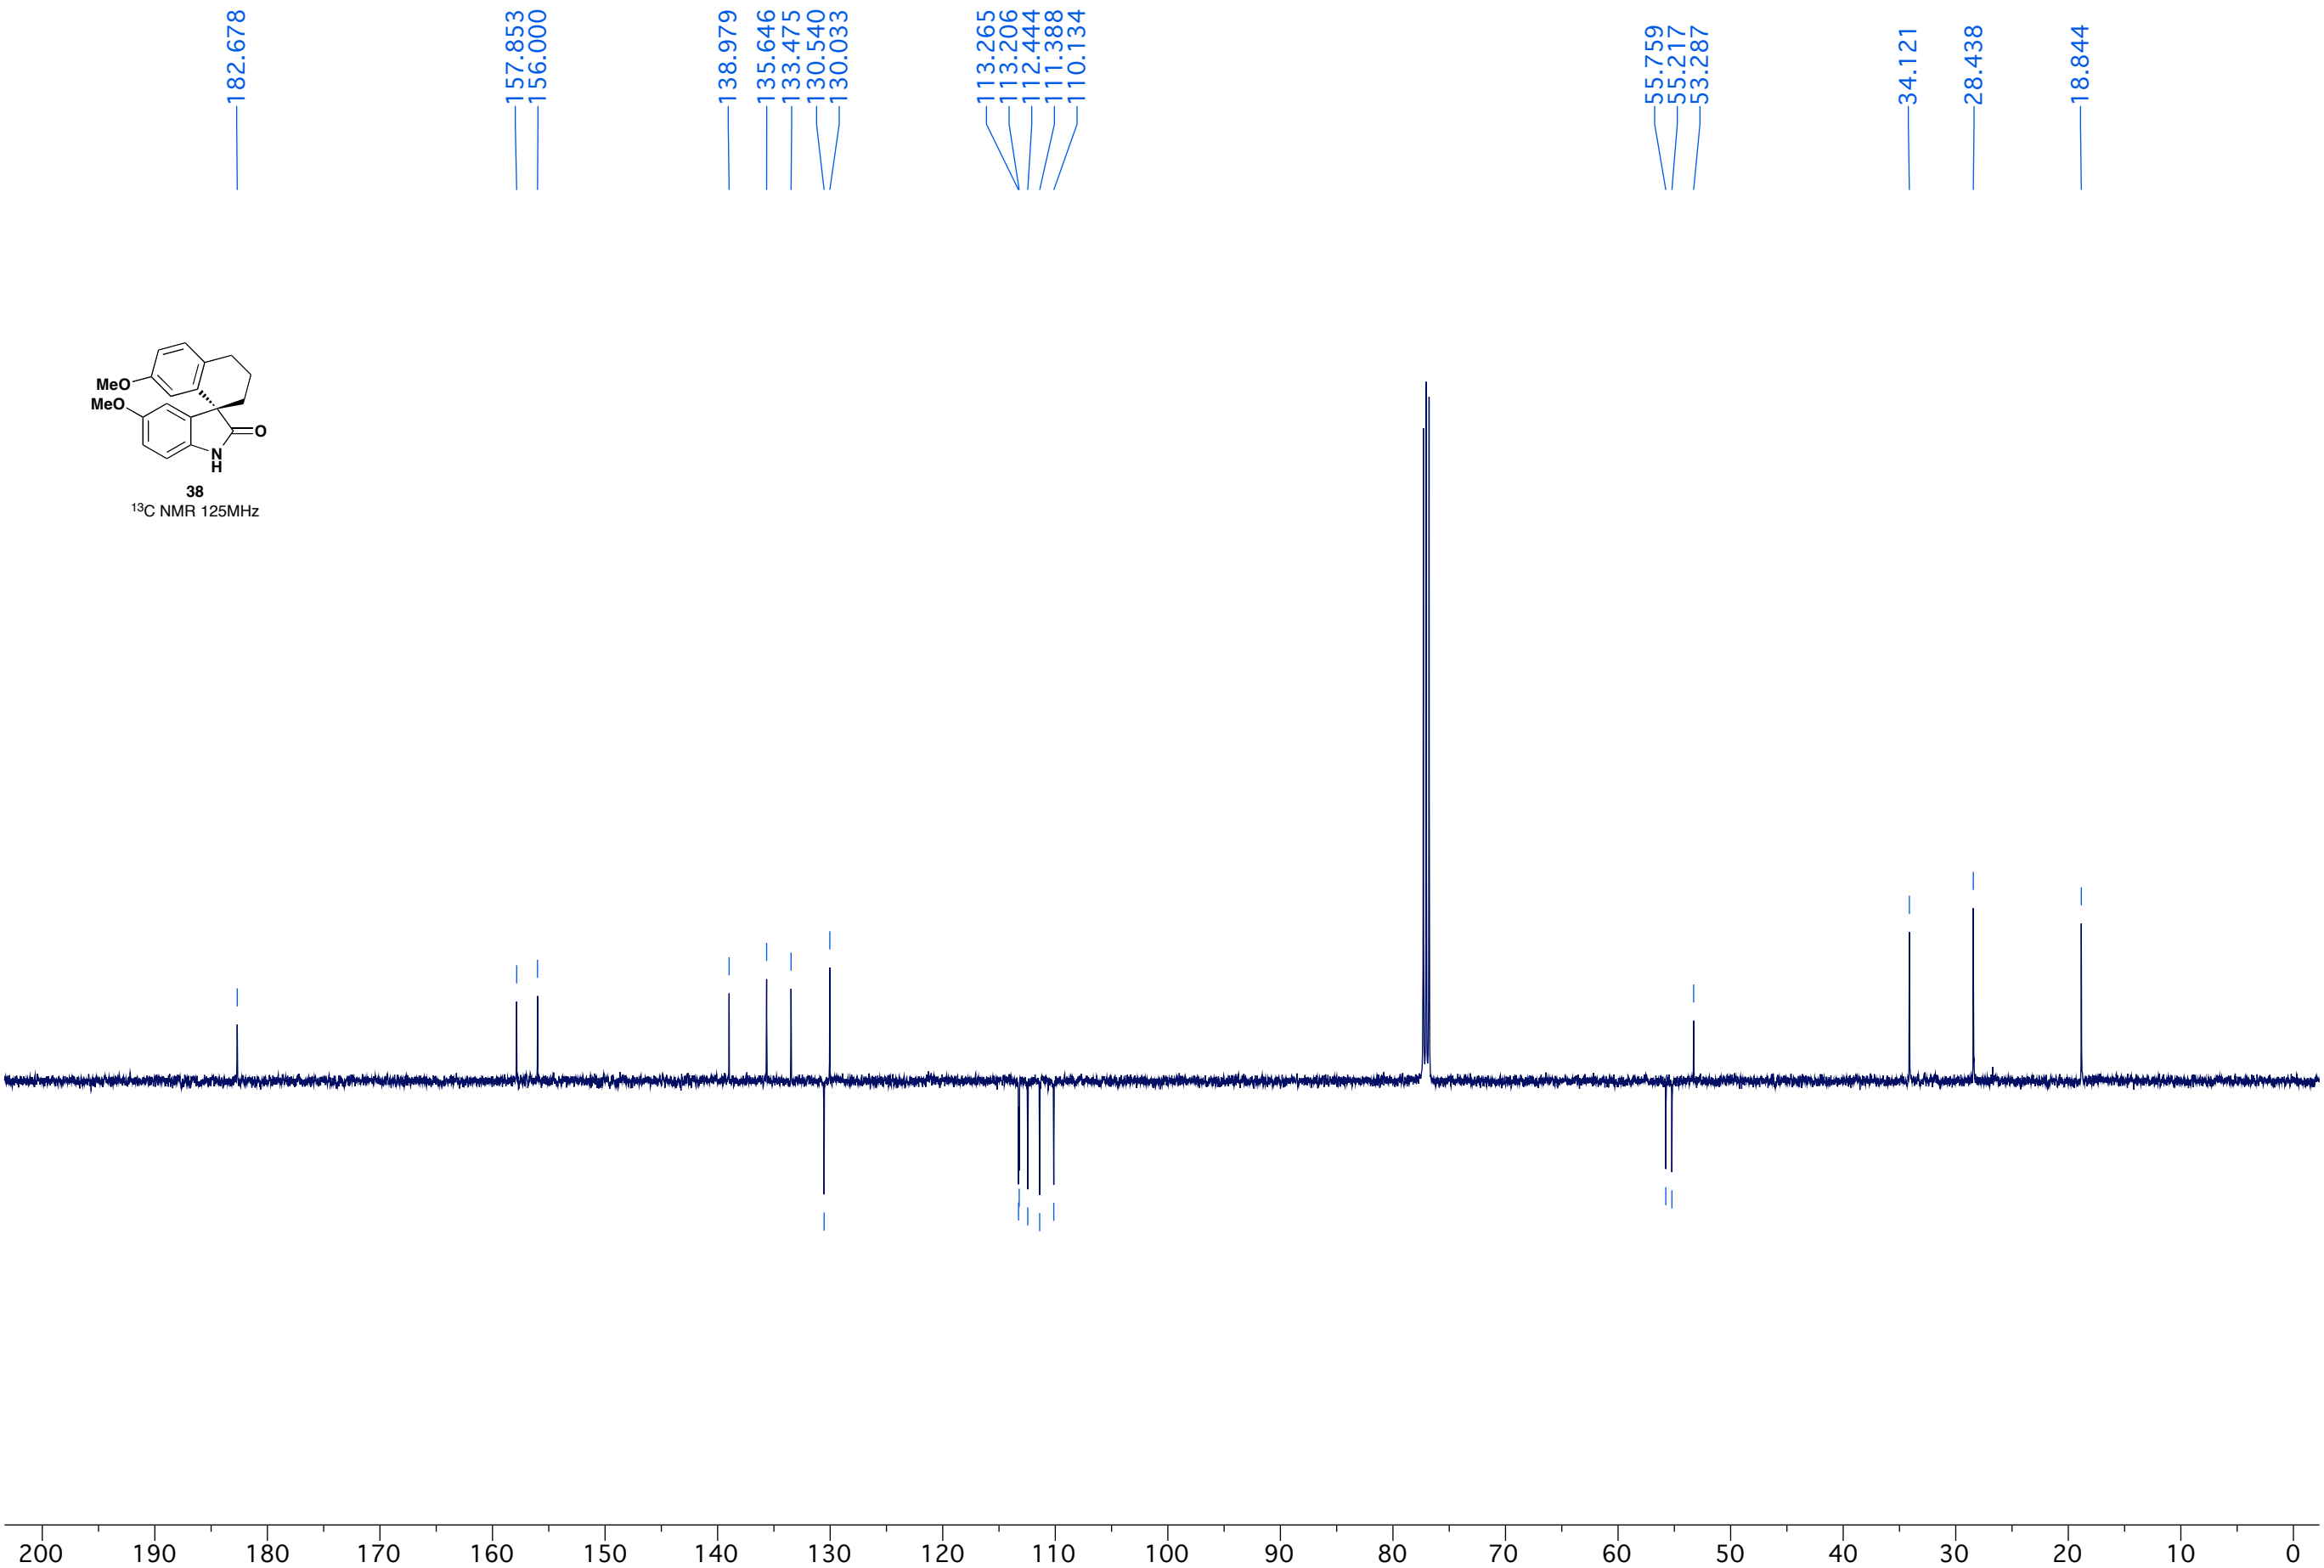

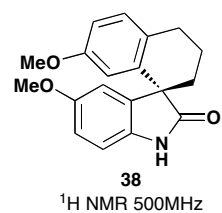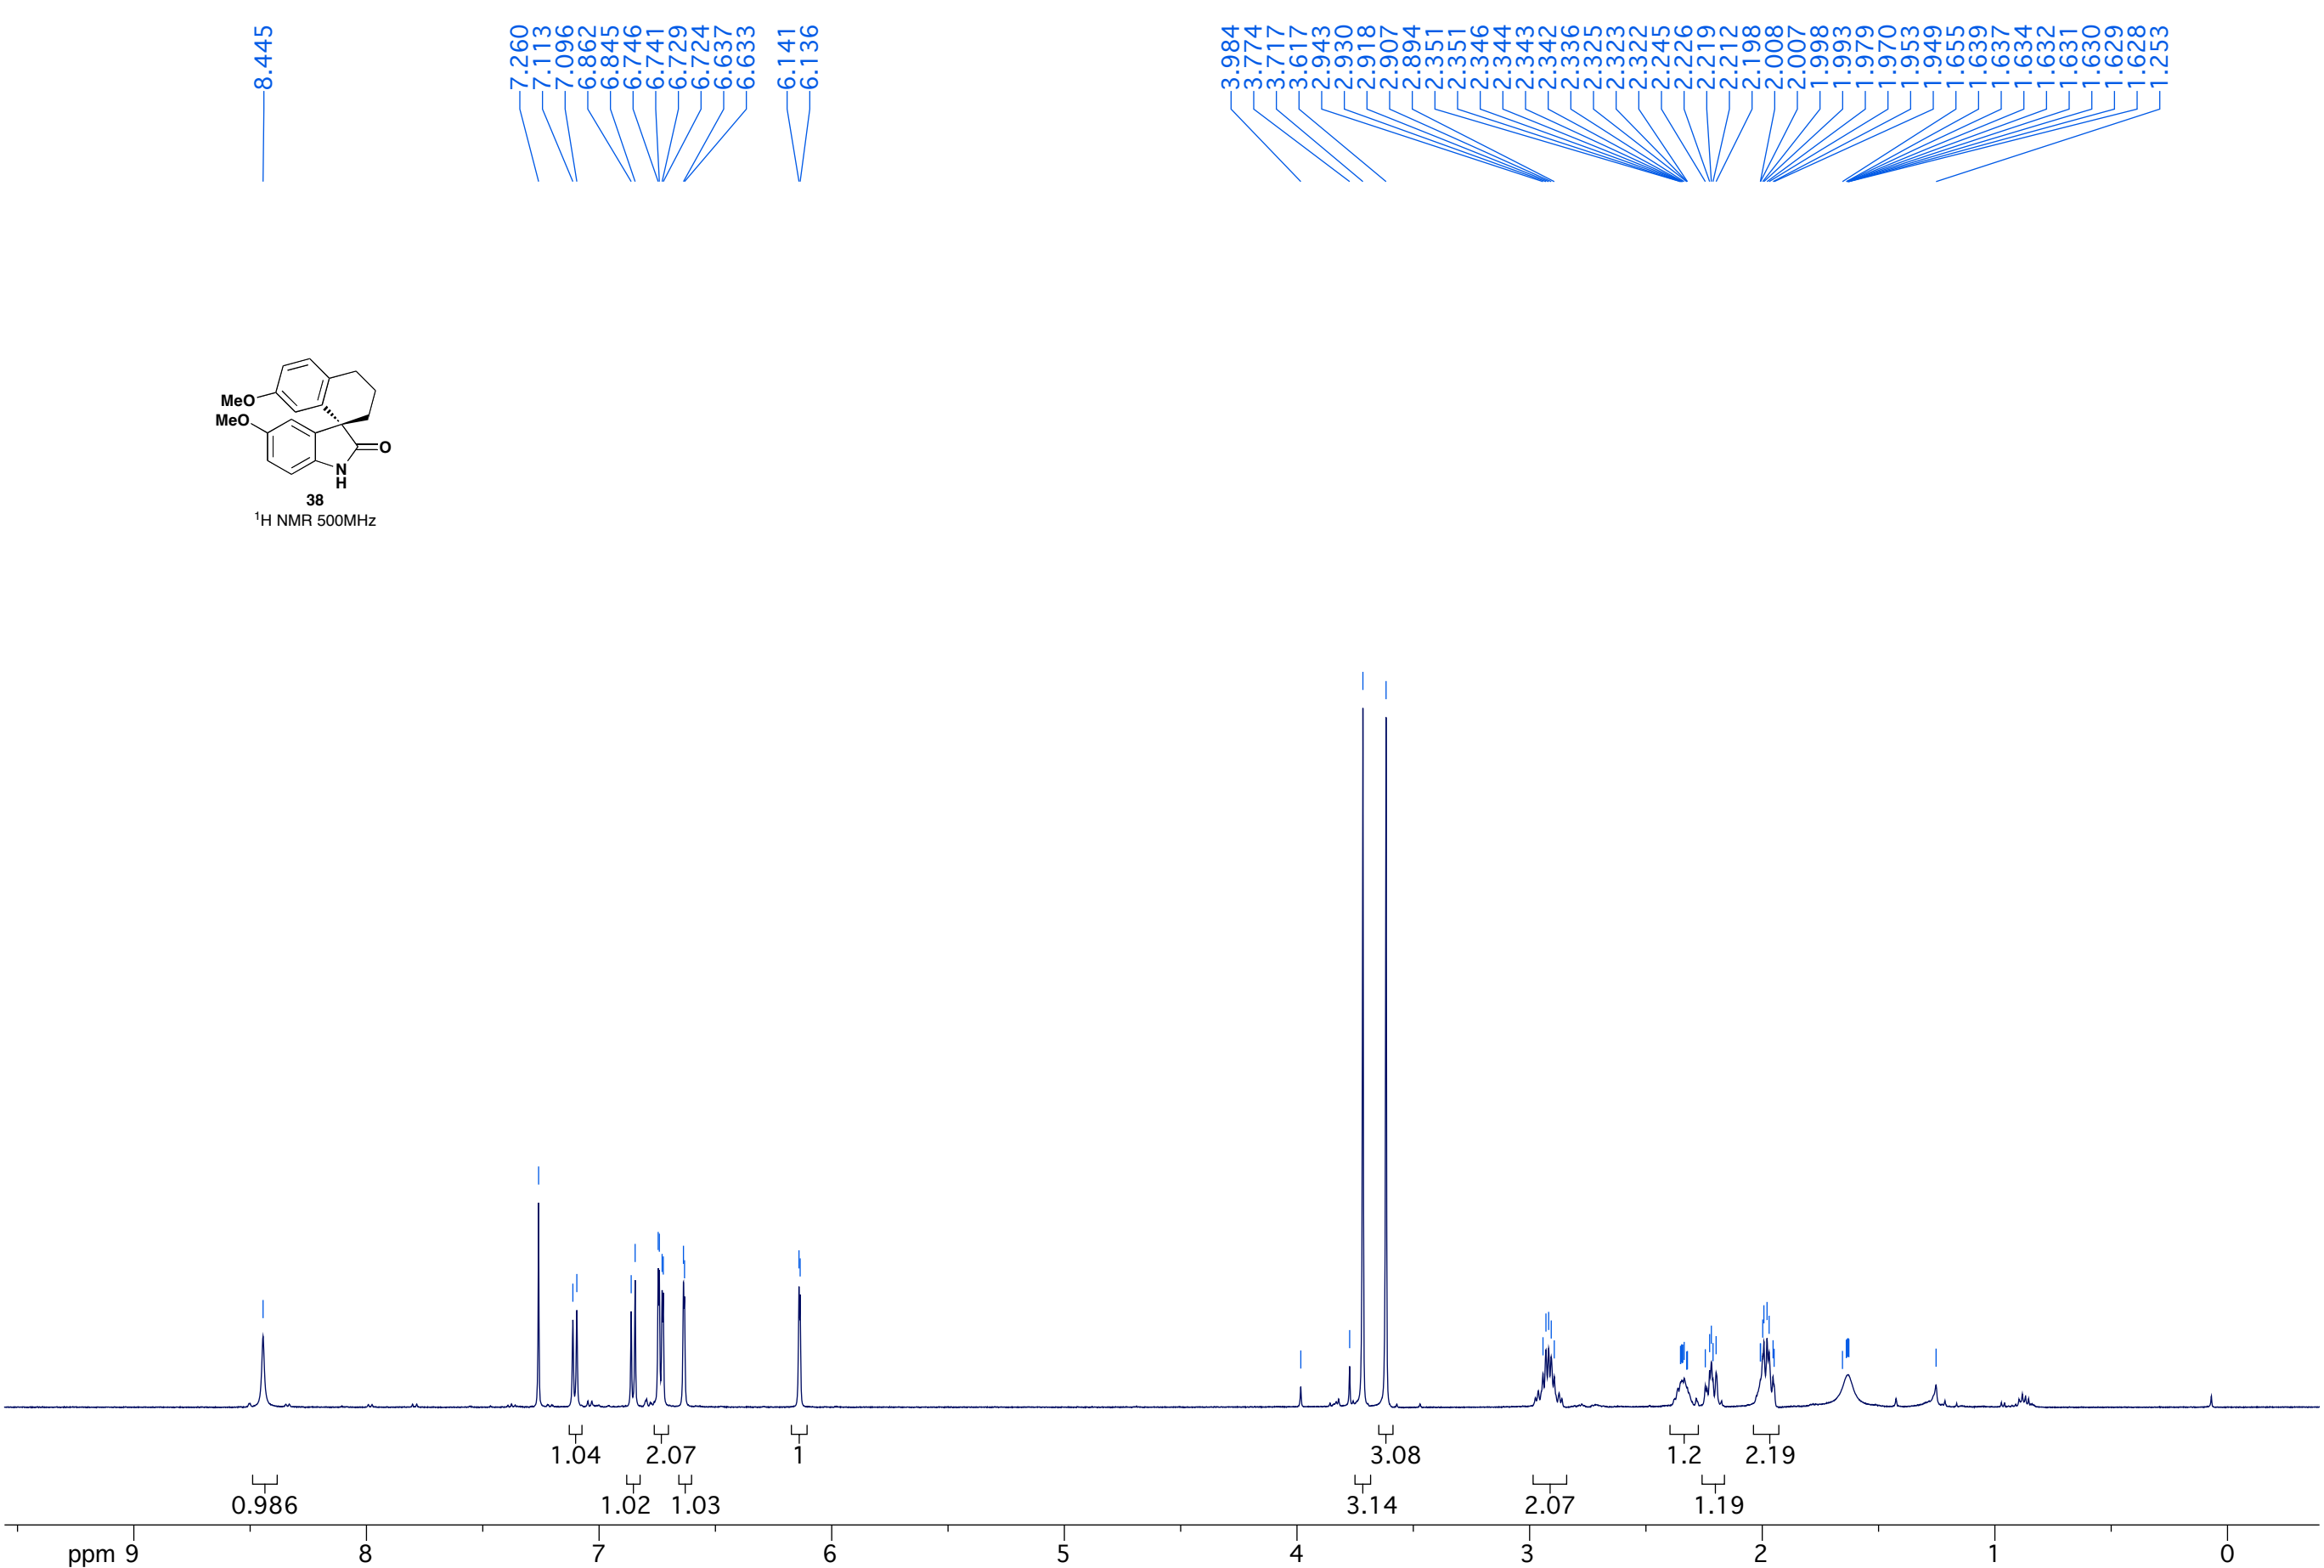

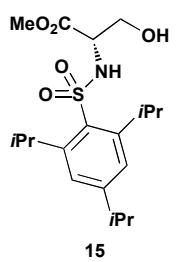

$^{13}\text{C}$ ,  $\text{CDCl}_3$ , 75 MHz

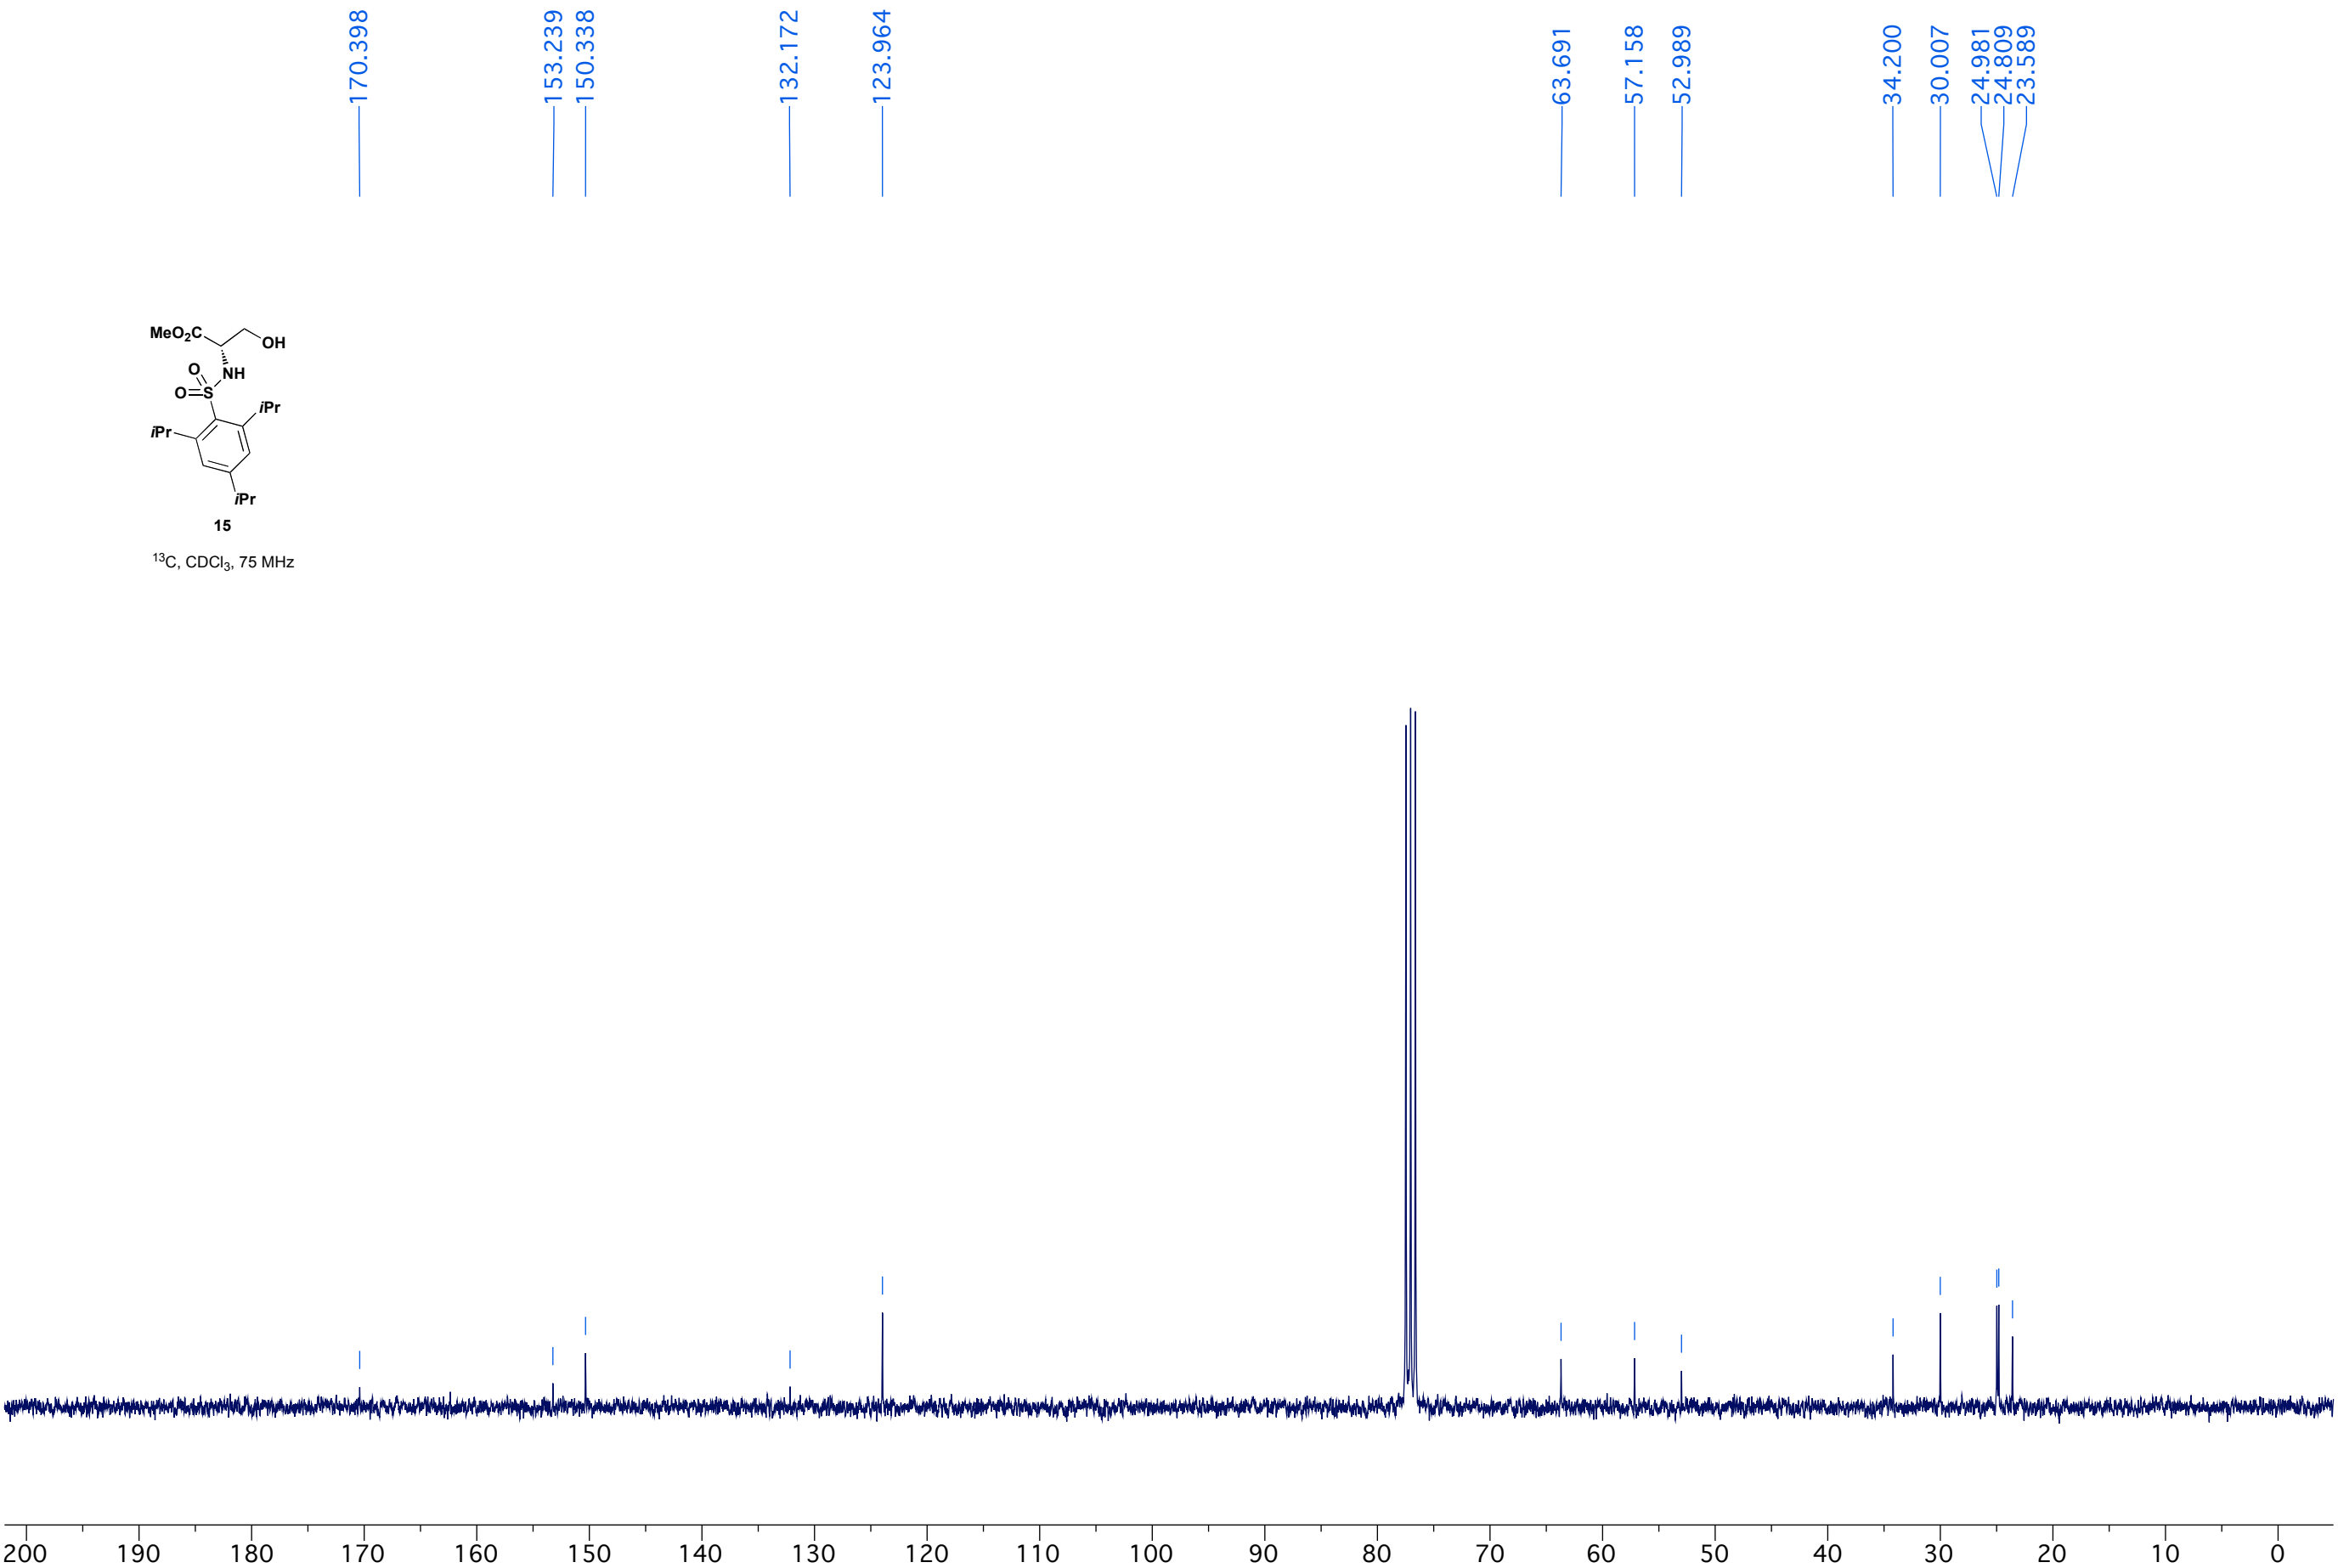

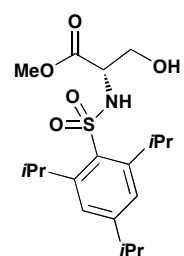

49

<sup>1</sup>H, CDCl<sub>3</sub>, 400 MHz

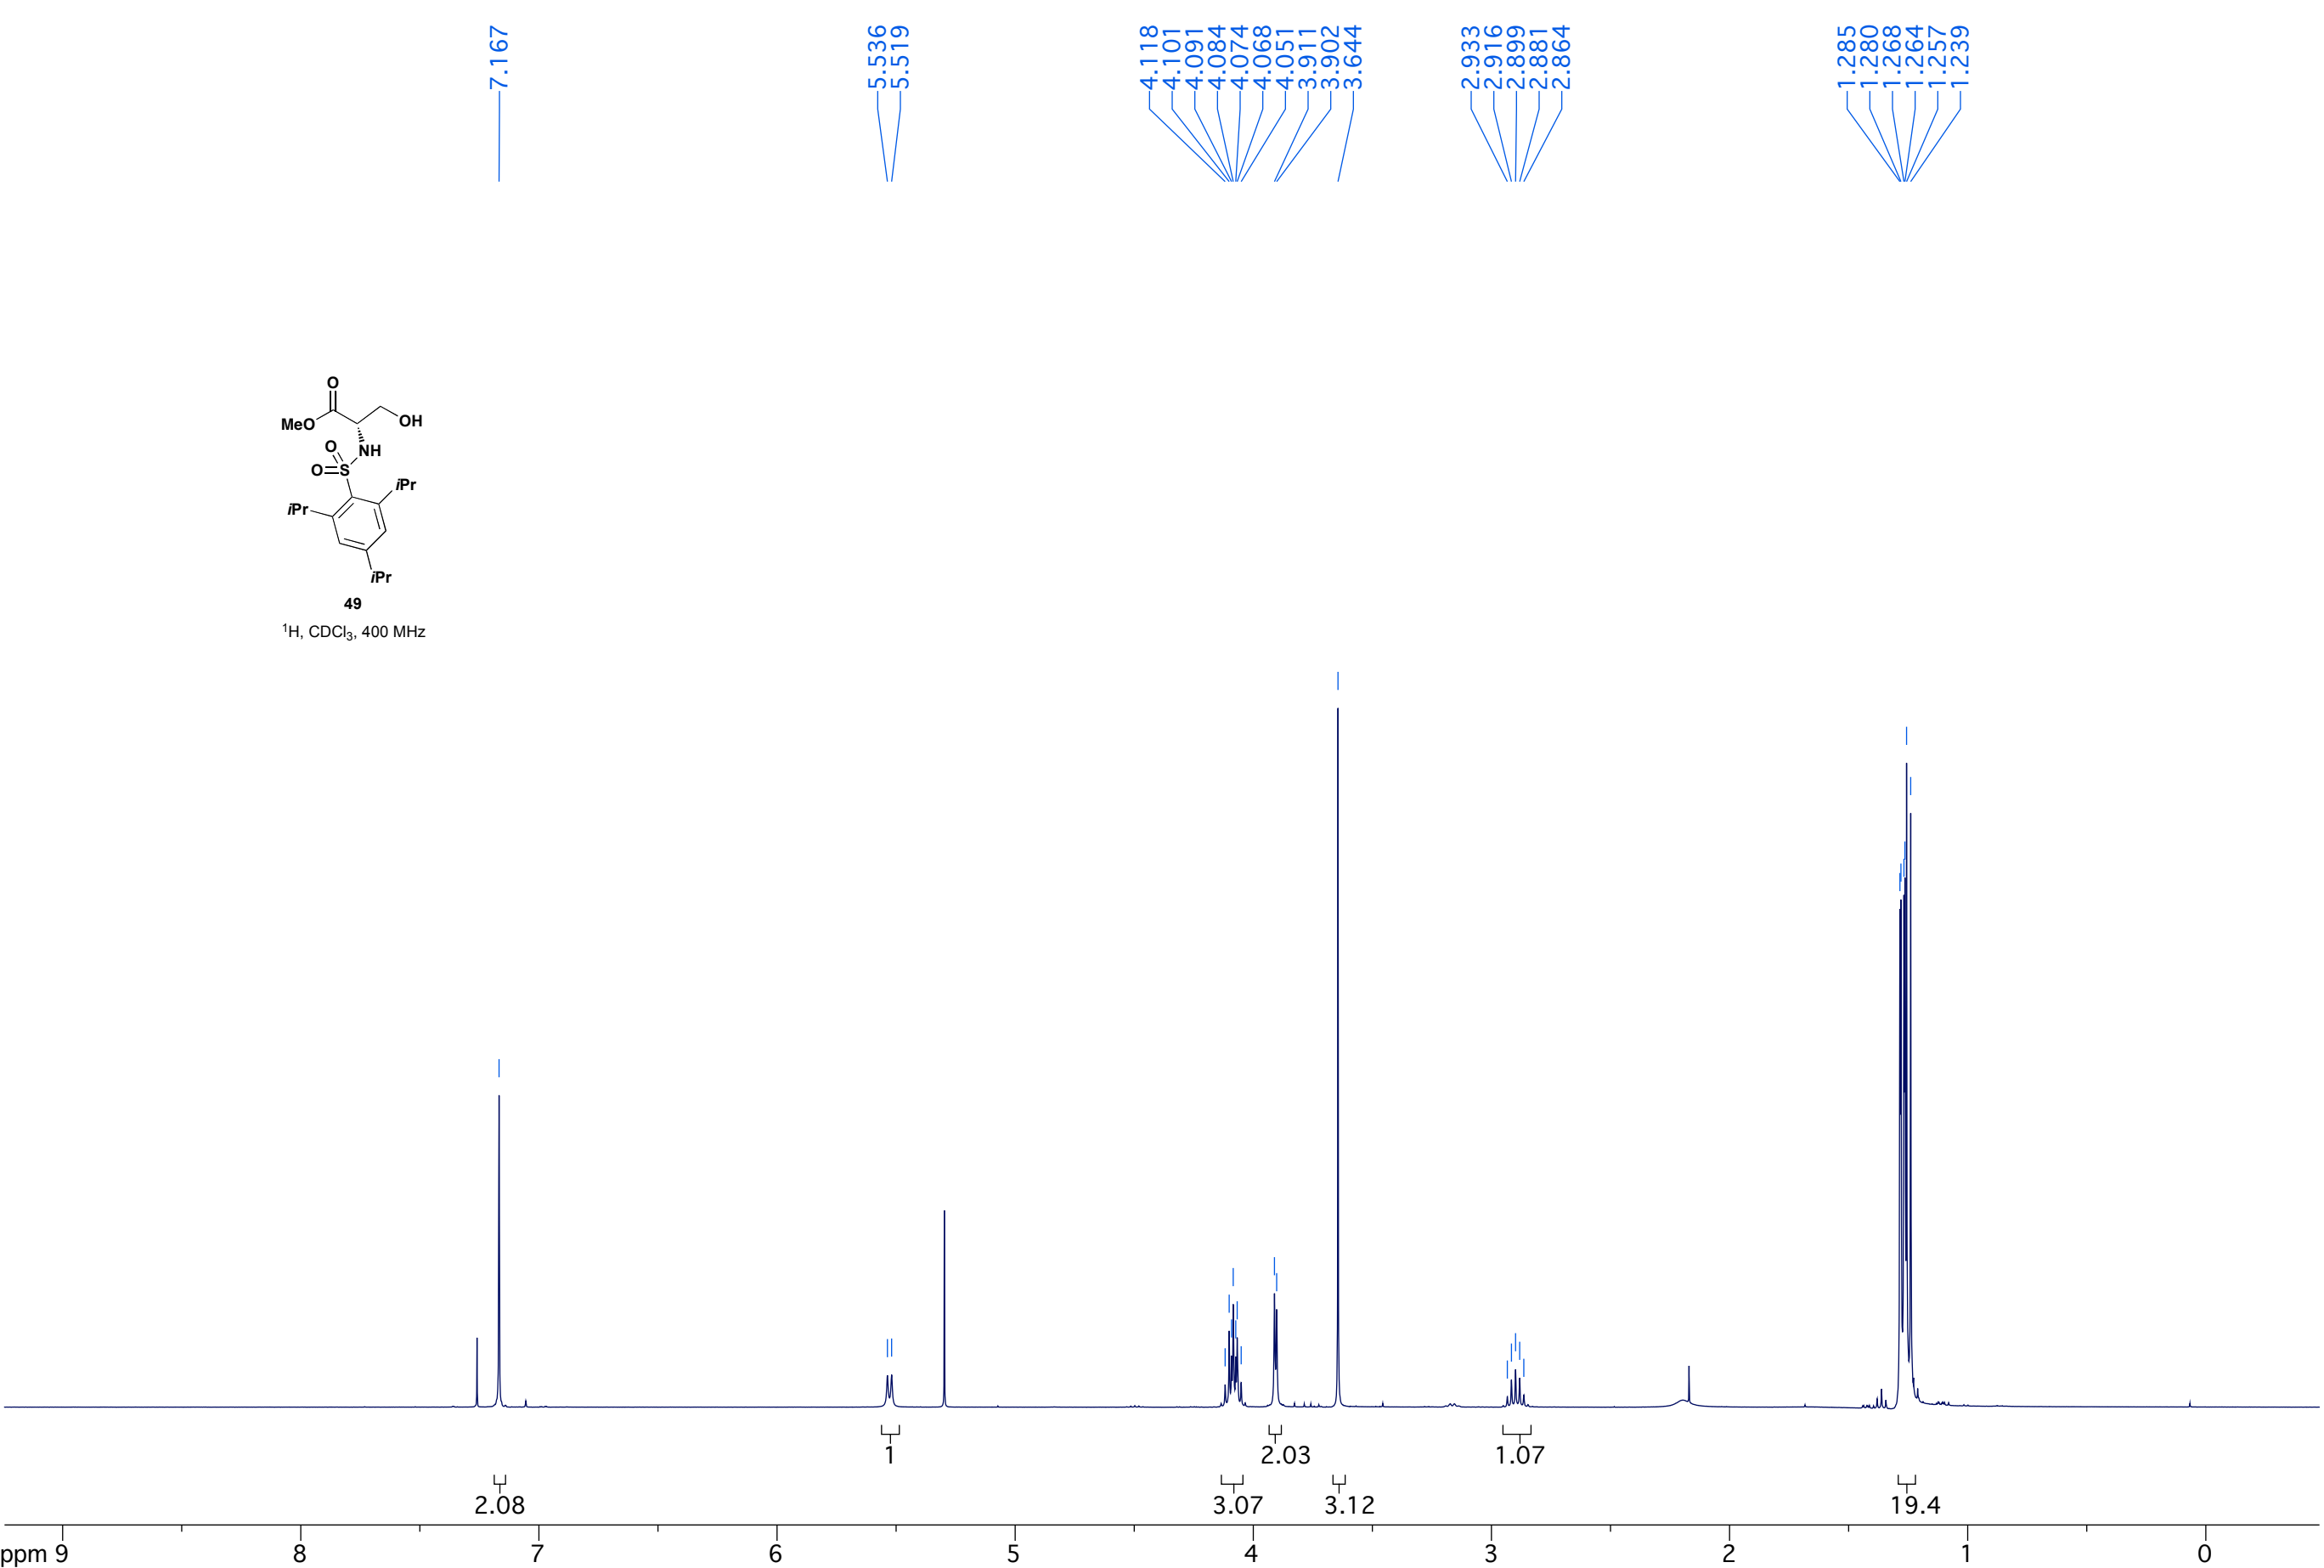

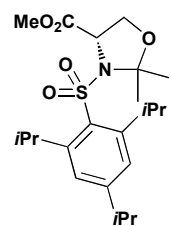

50

$^{13}\text{C}$ ,  $\text{CDCl}_3$ , 75 MHz

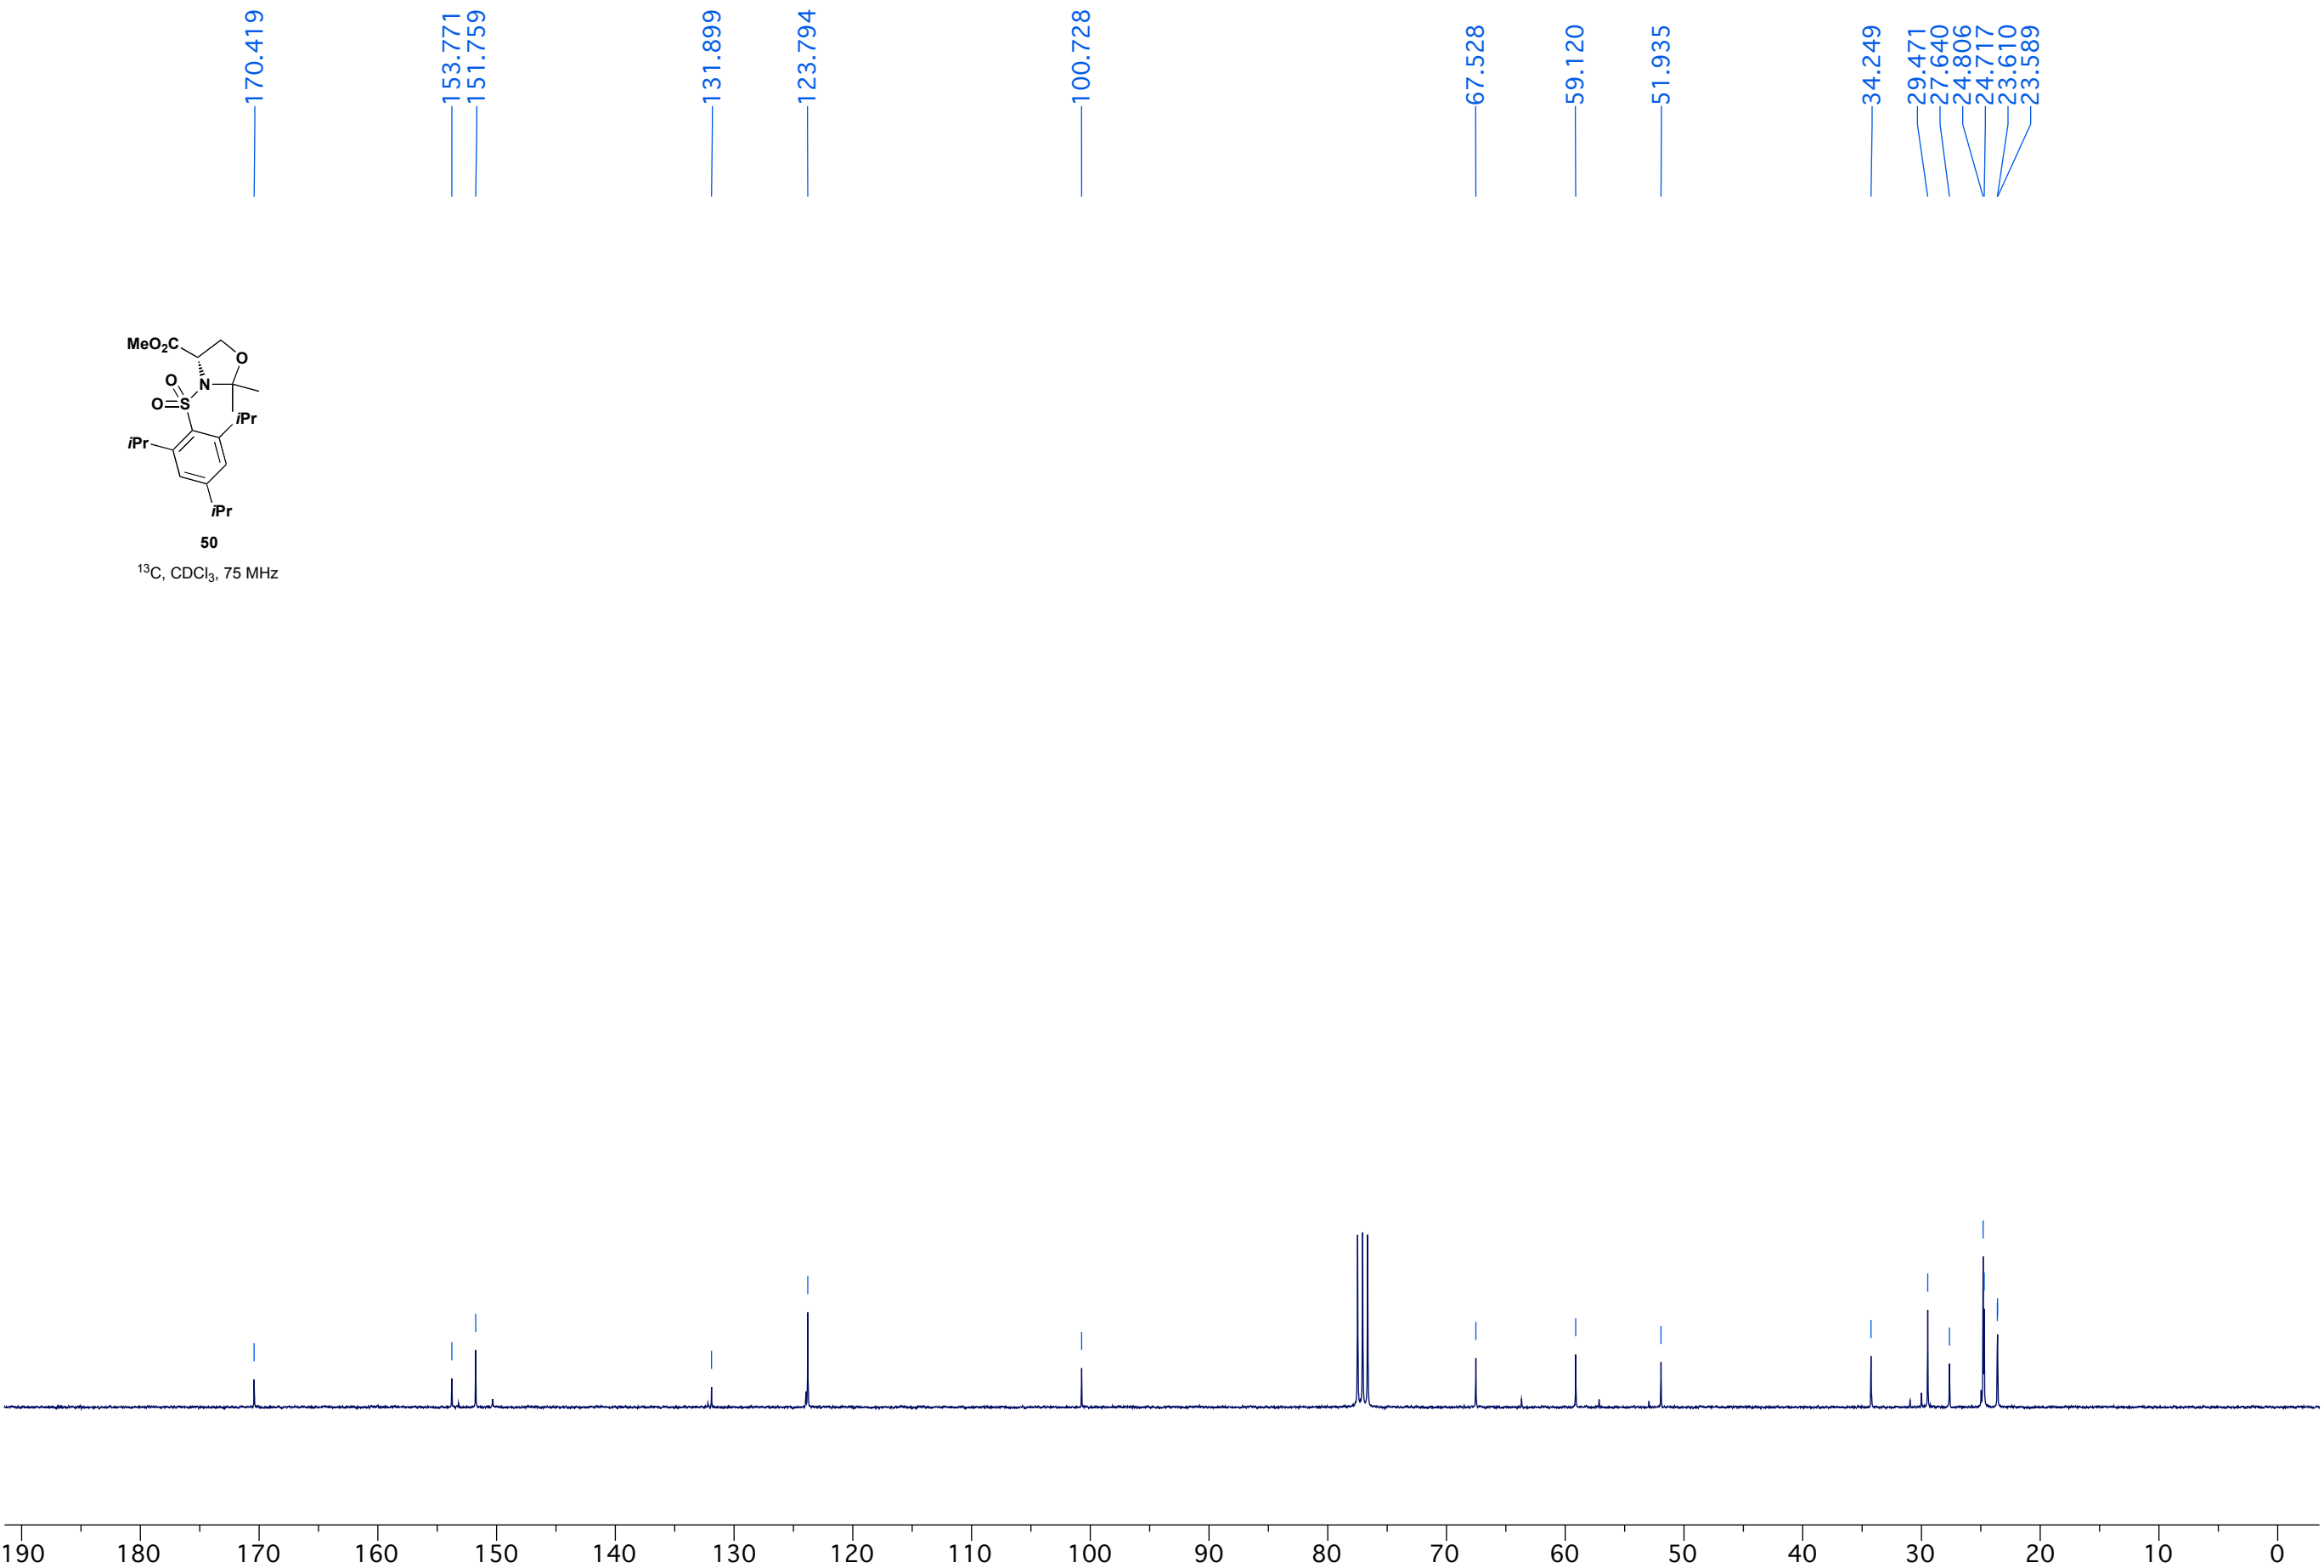

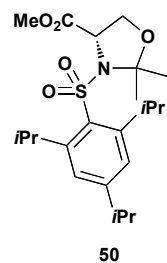

$^1\text{H}$ ,  $\text{CDCl}_3$ , 300 MHz

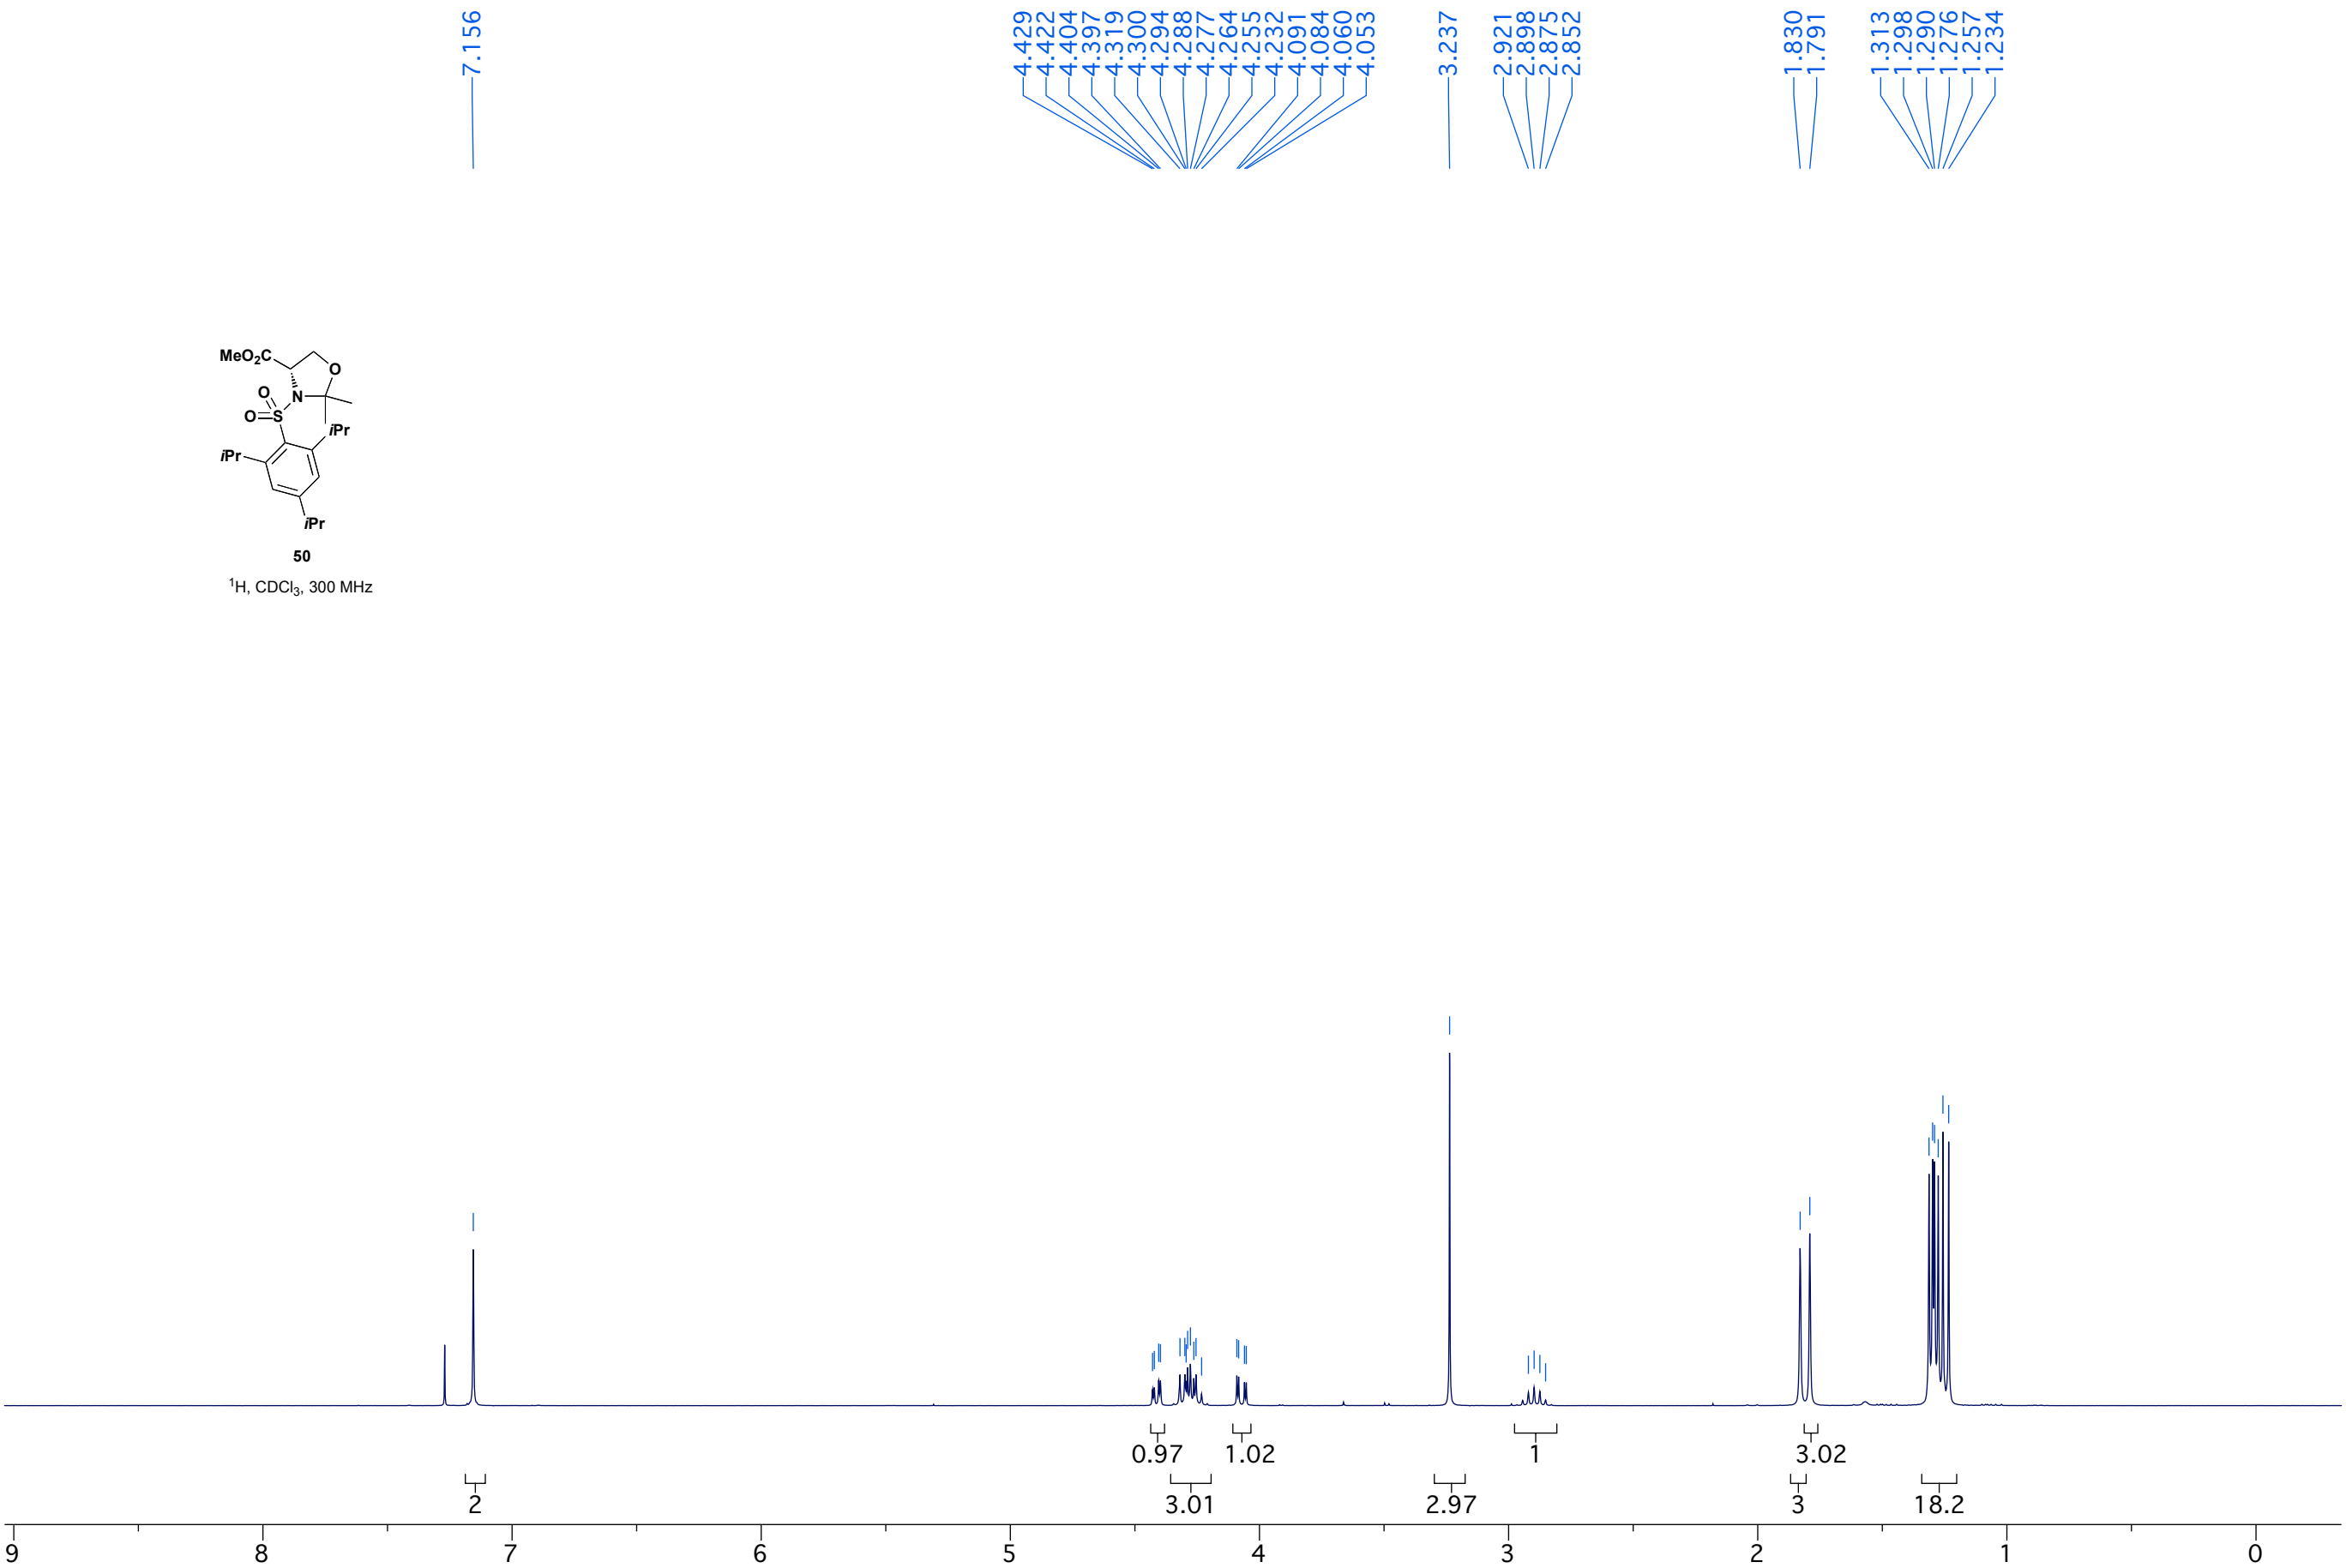

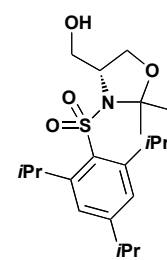

51

$^{13}\text{C}$ ,  $\text{C}_6\text{D}_6$ , 75 MHz

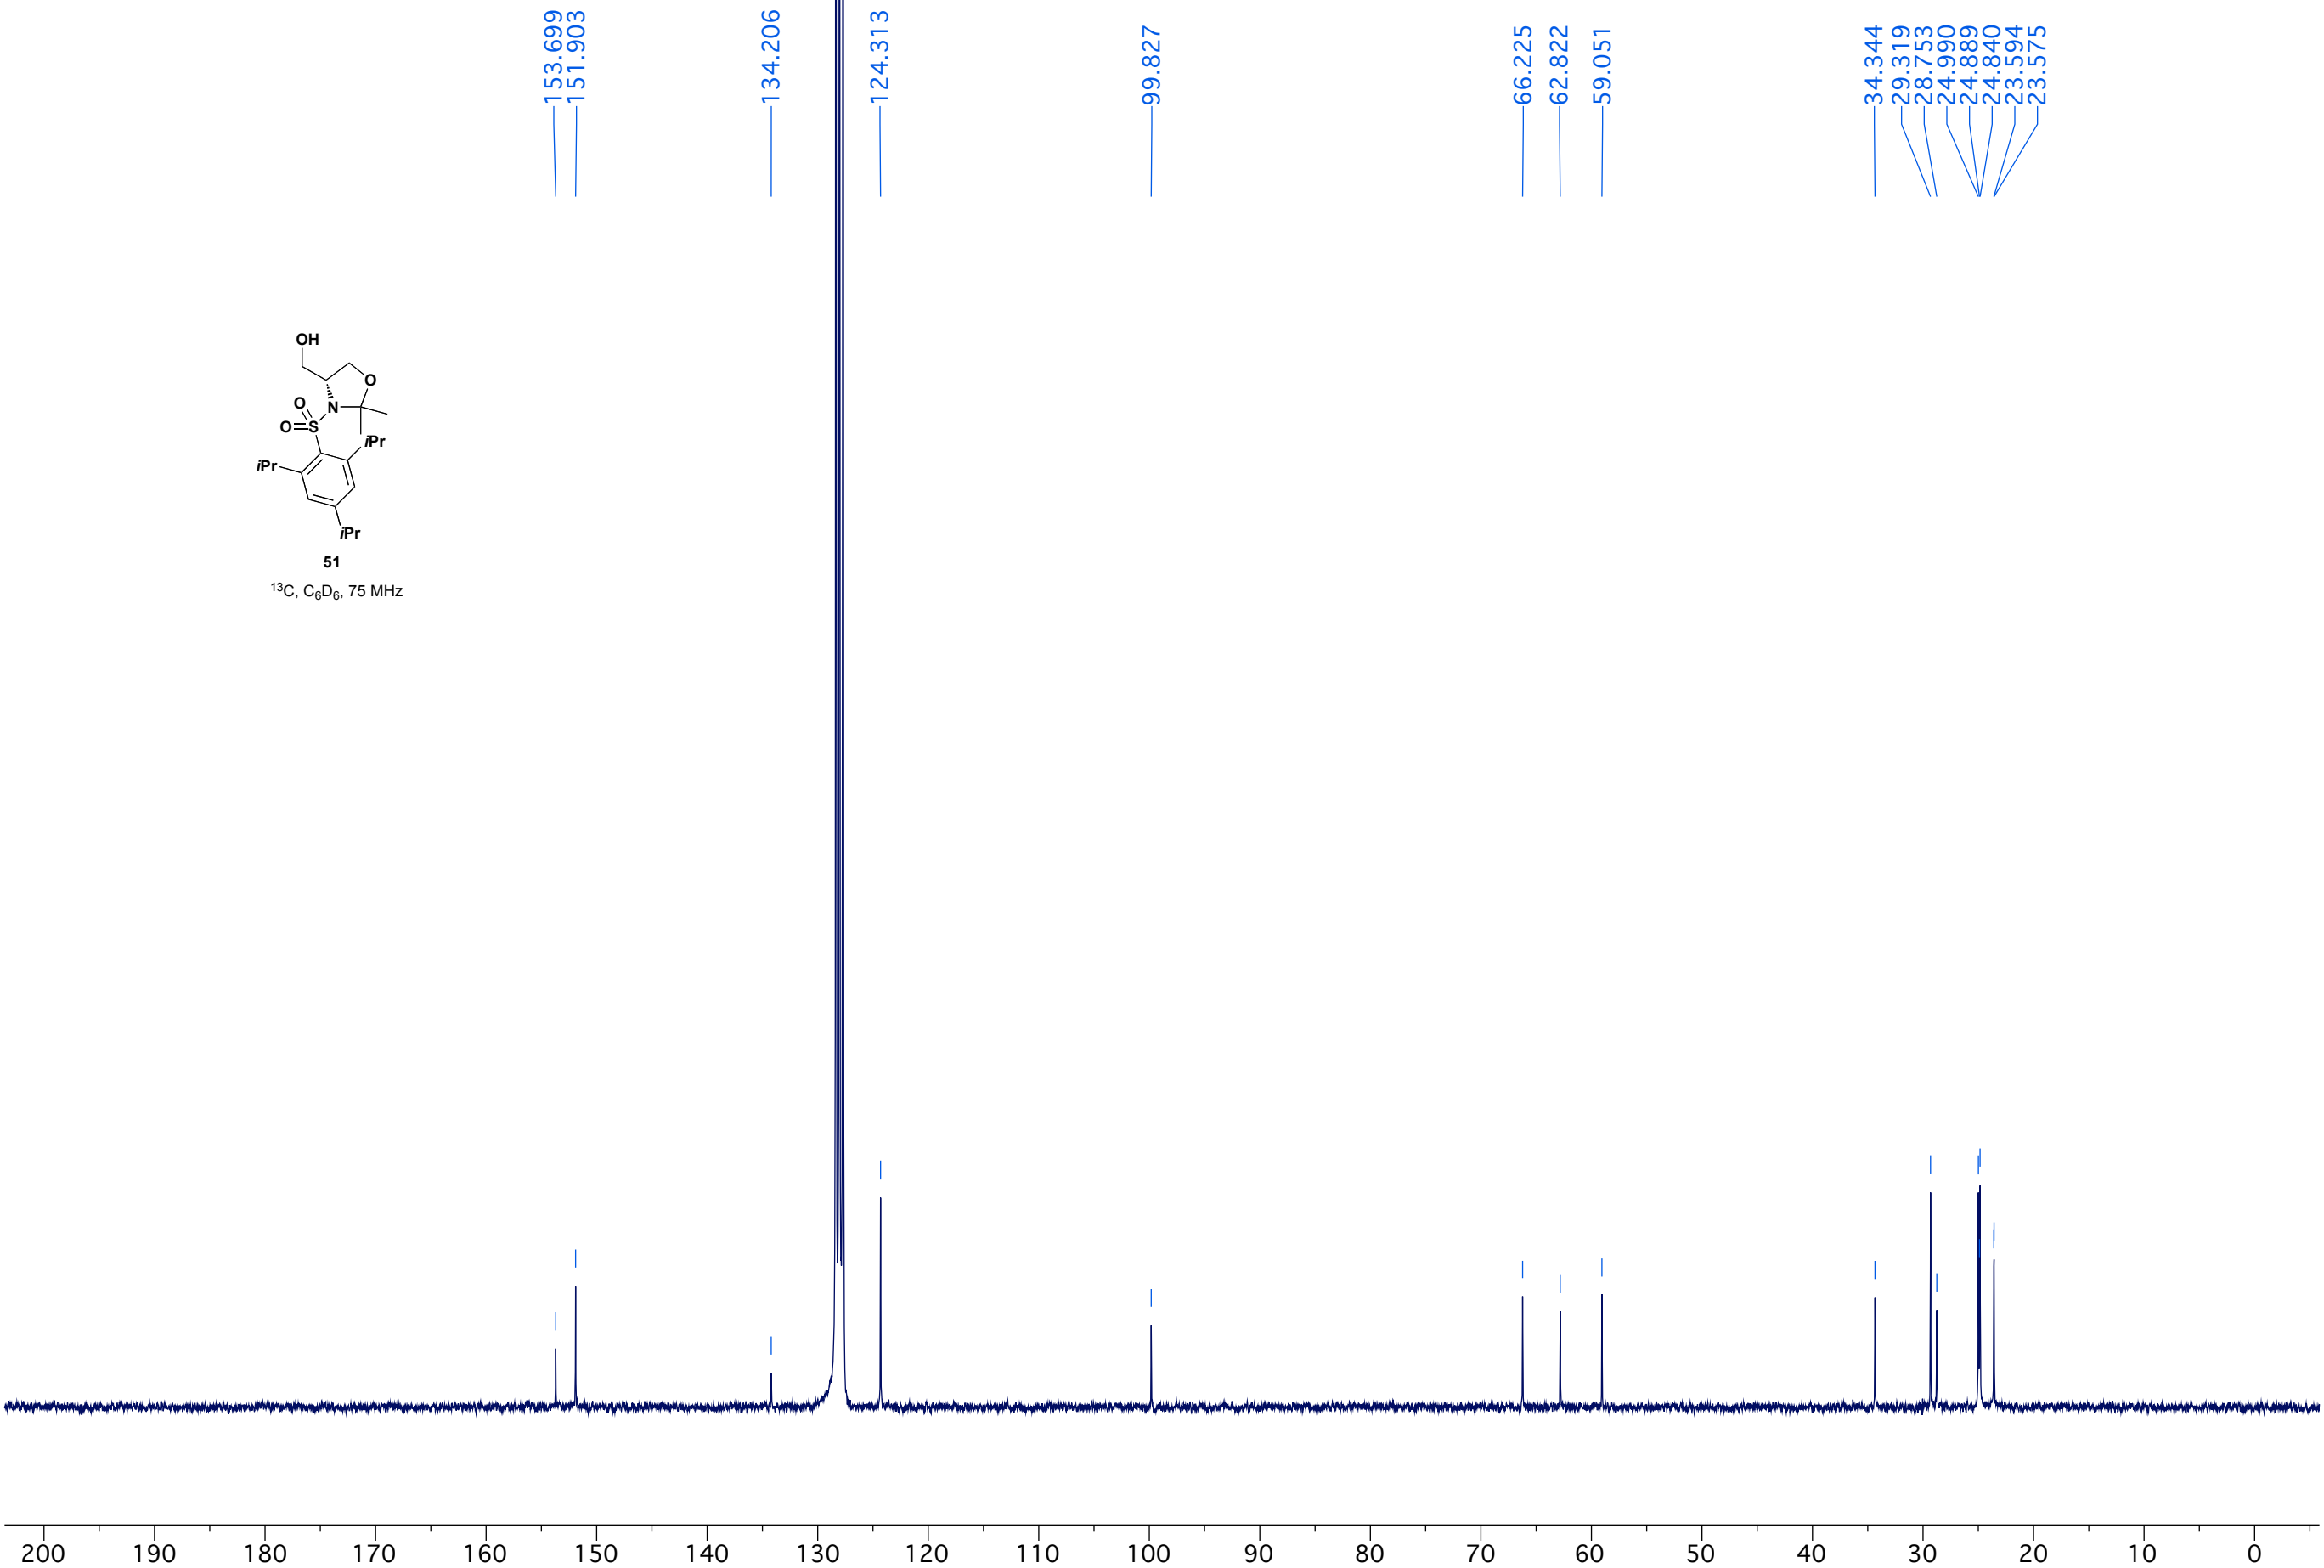

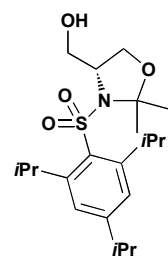

51

$^1\text{H}$ ,  $\text{C}_6\text{D}_6$ , 300 MHz

7.182  
7.160

4.714  
4.691  
4.668  
4.646  
4.623

3.859  
3.855  
3.850  
3.843  
3.837  
3.824  
3.821  
3.816  
3.796

2.954  
2.923  
2.892  
2.669  
2.647  
2.623  
2.600

1.884  
1.771

1.372  
1.349  
1.313  
1.291  
1.096  
1.073

2.03

2

3

1

2.04

2.95

2.98

5.97

6.19

6.34

ppm 8

7

6

5

4

3

2

1

0



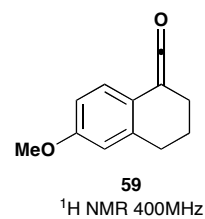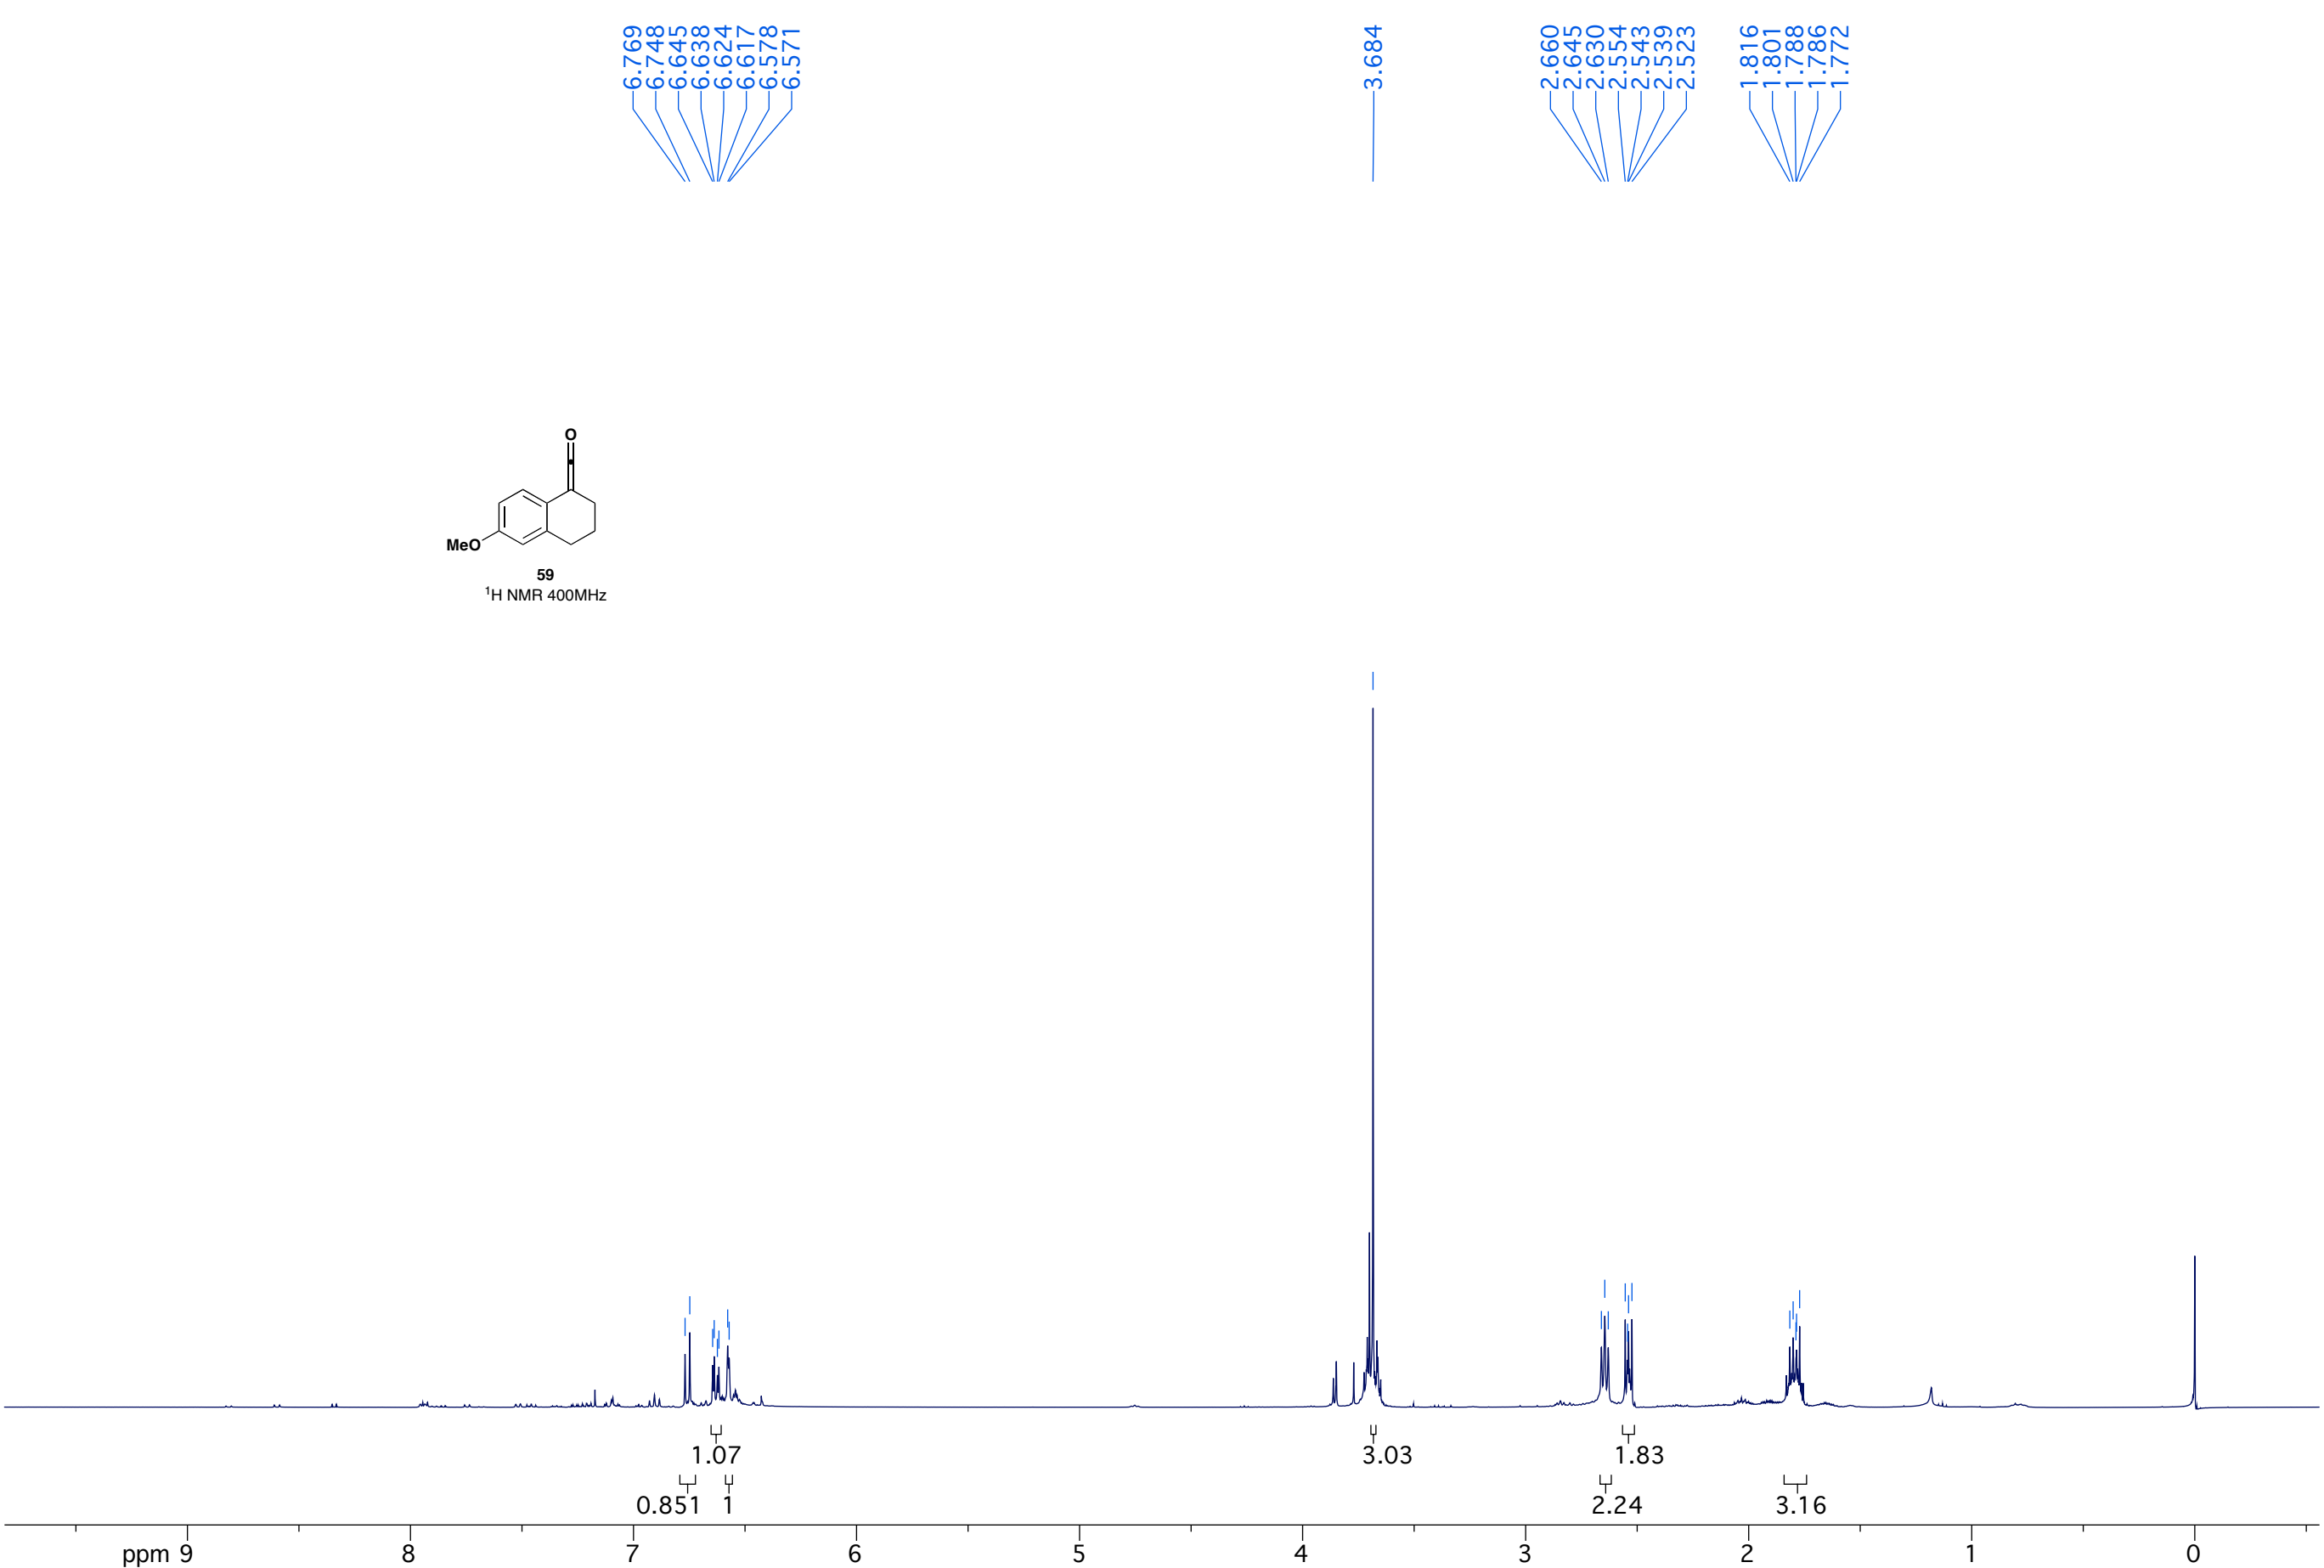

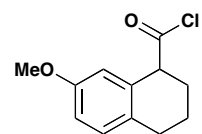

**64**  
<sup>13</sup>C NMR 75MHz

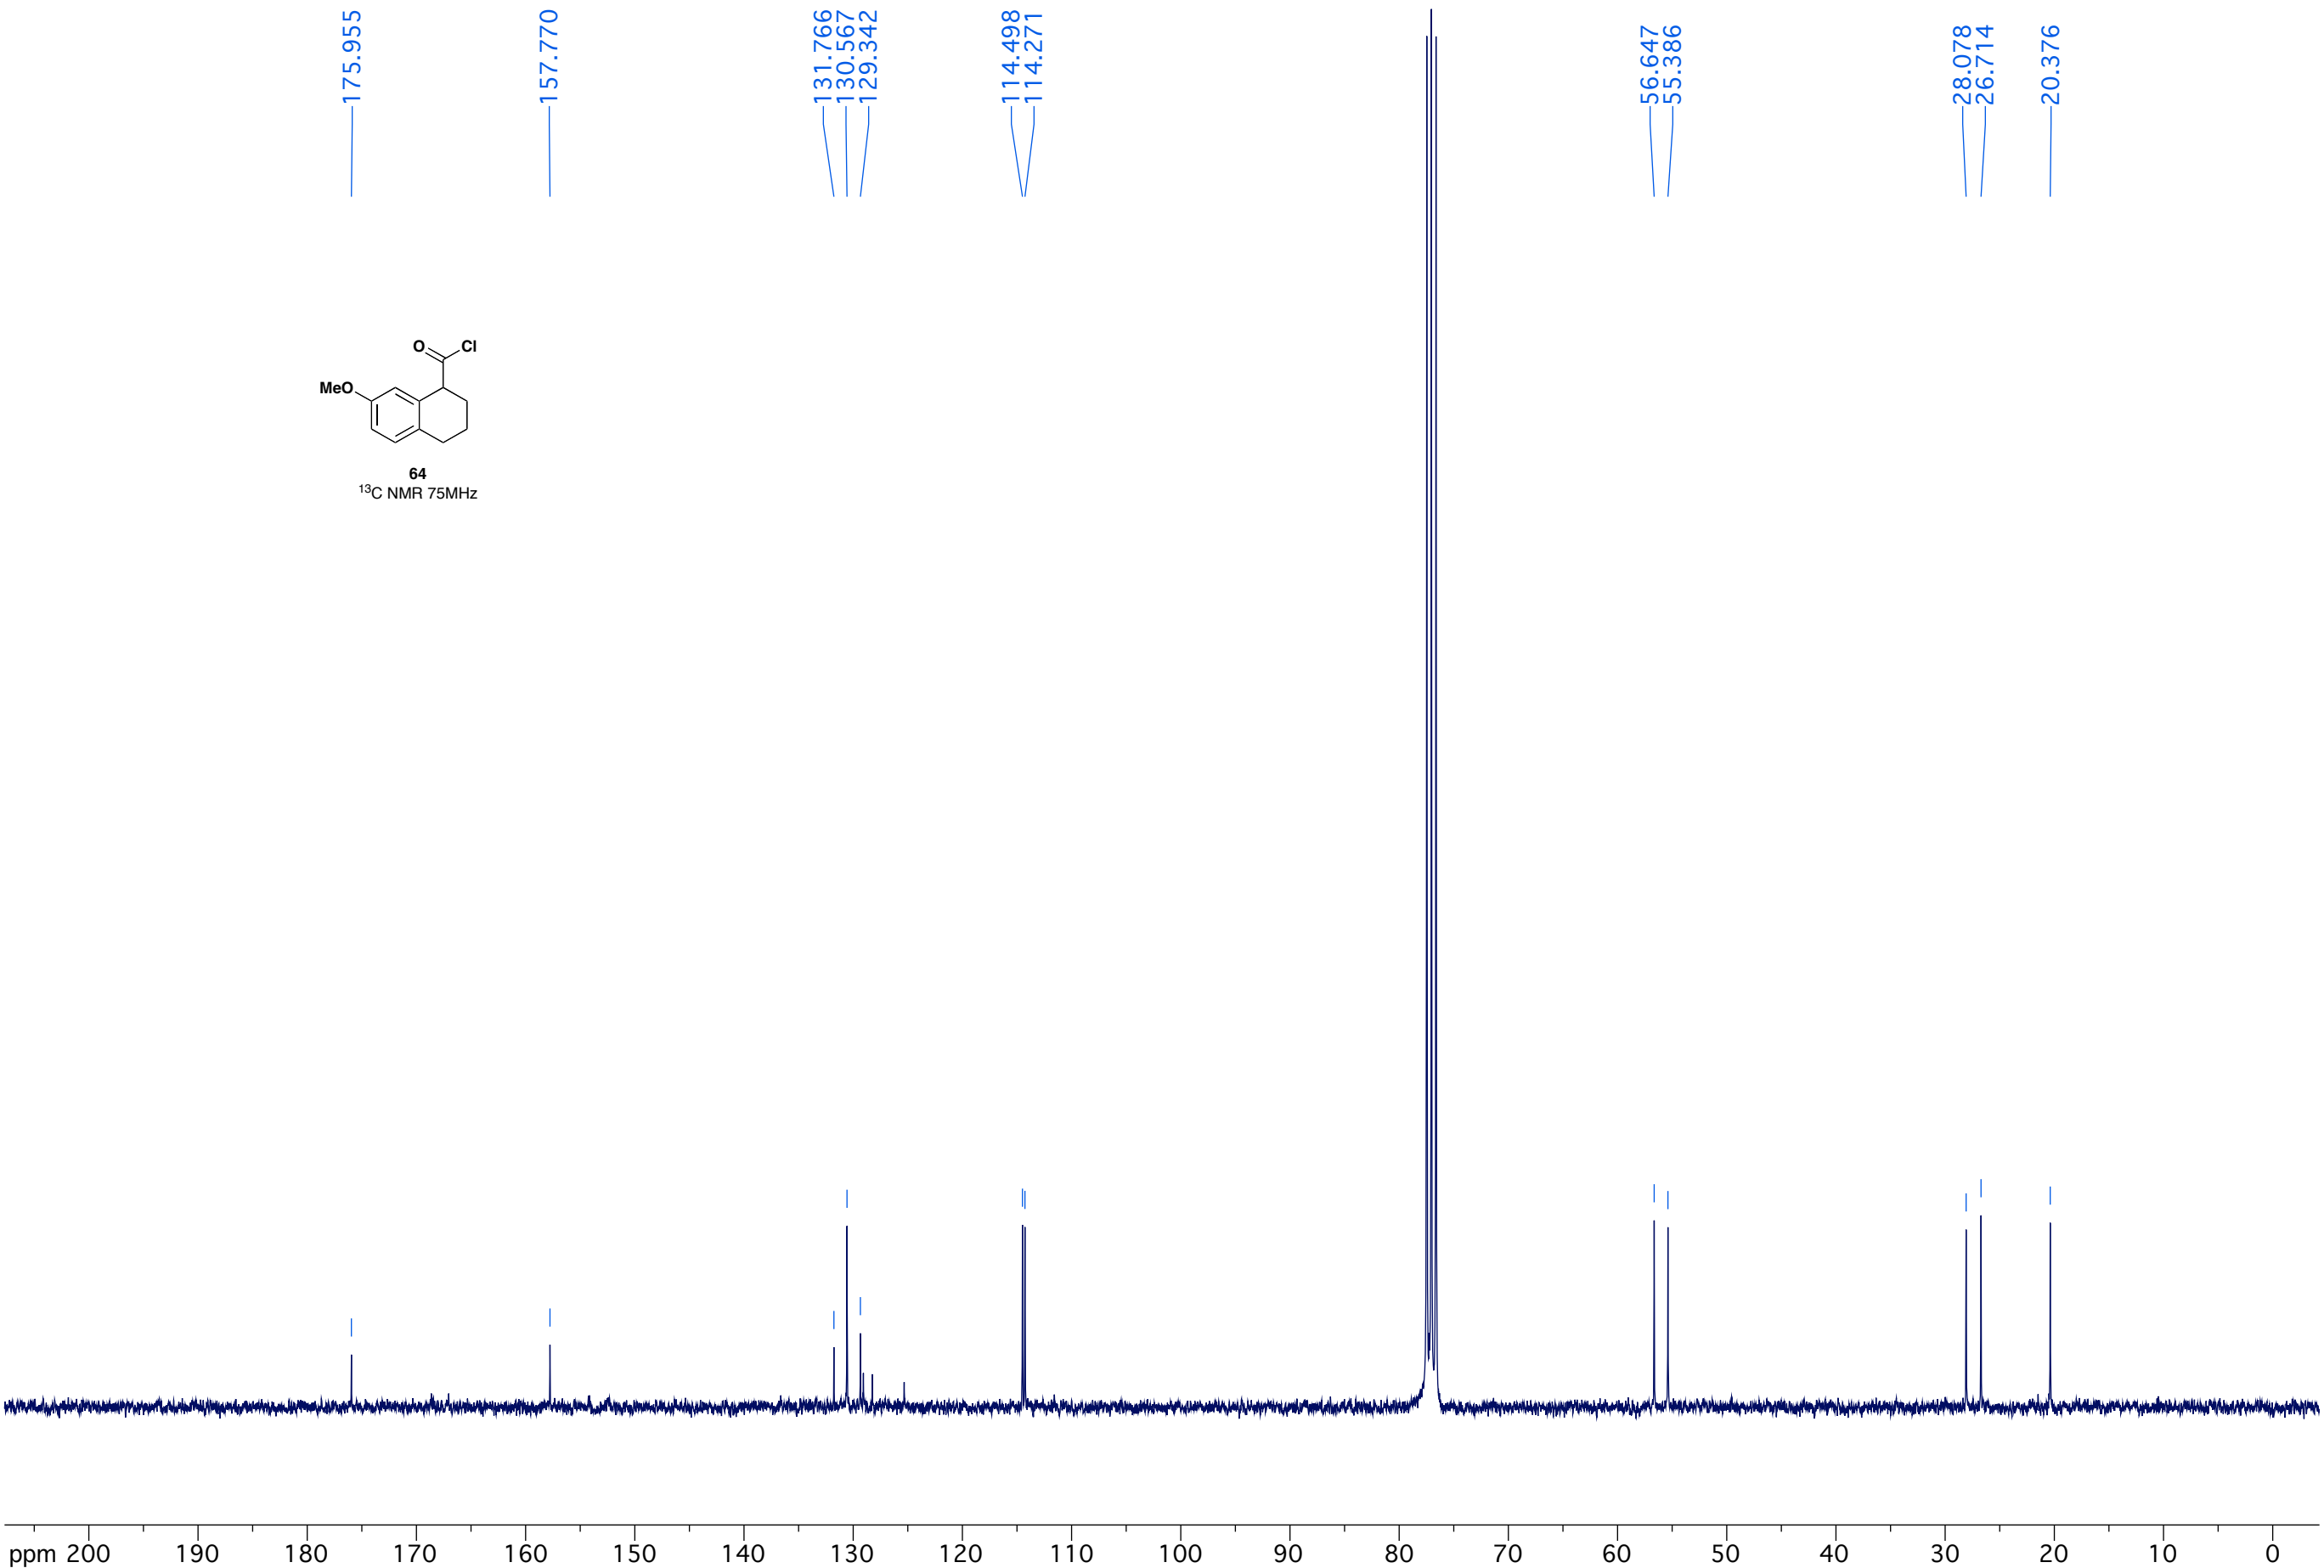

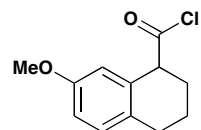

**64**  
<sup>1</sup>H NMR 300MHz

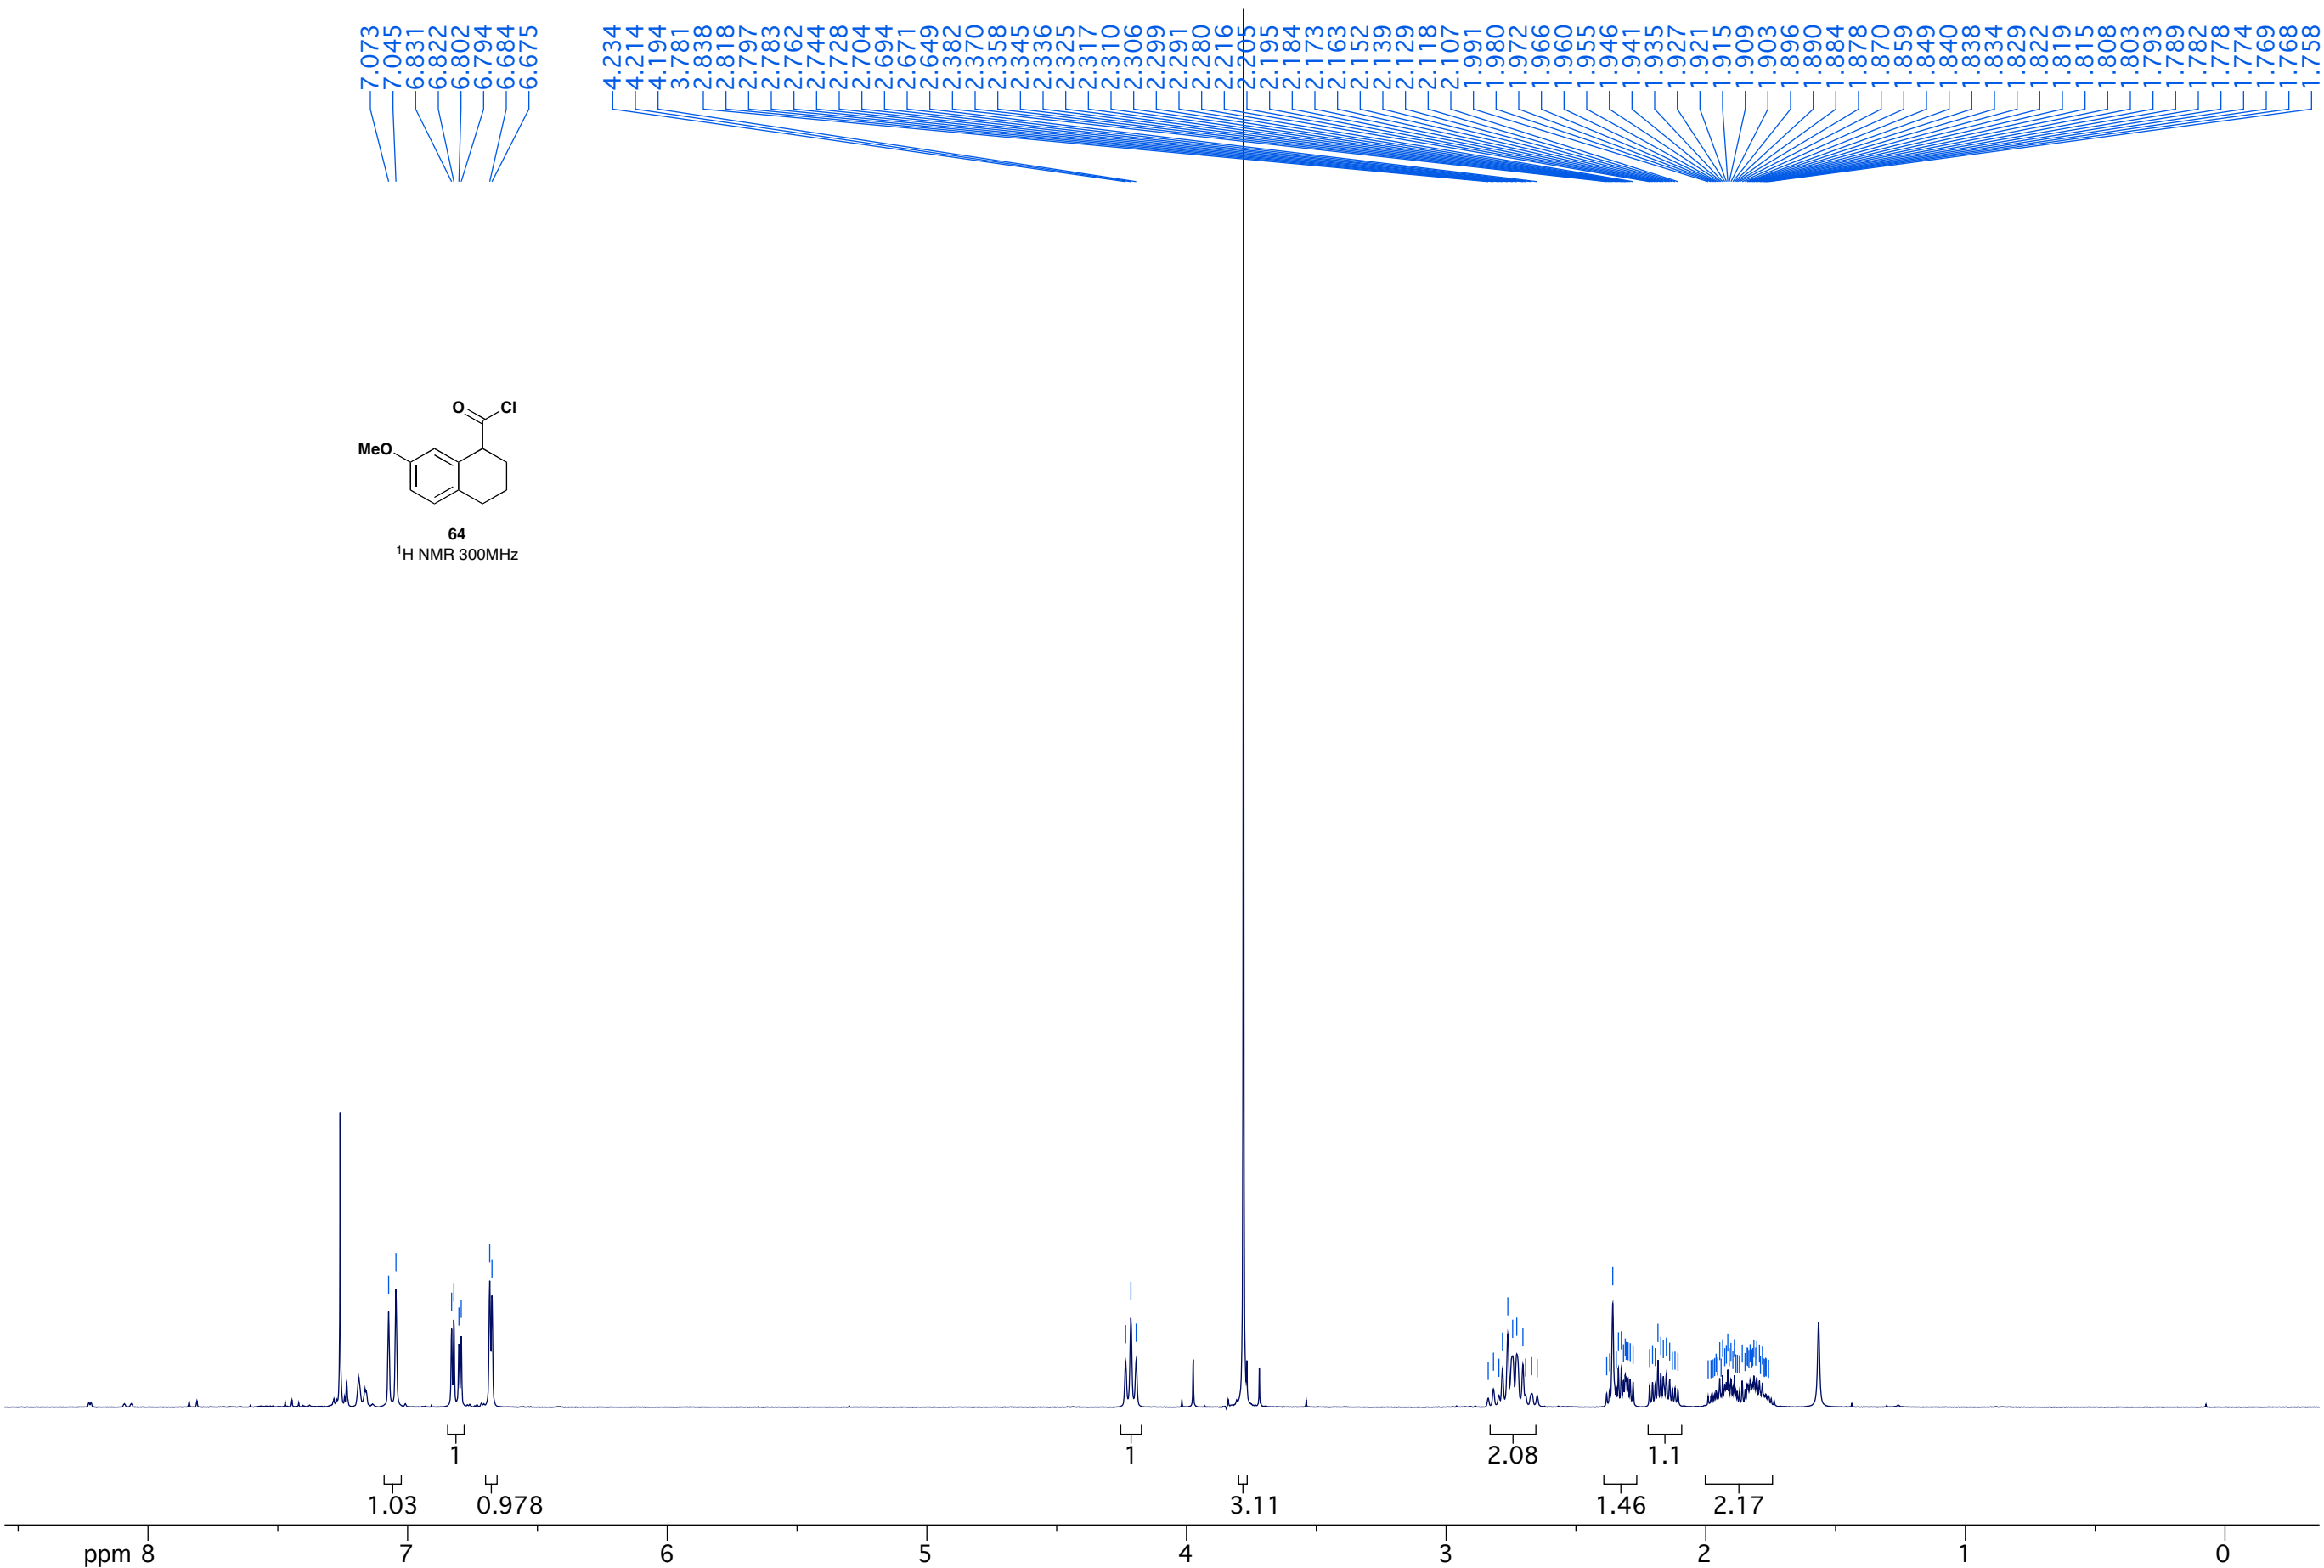

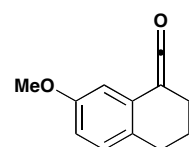

**65**  
<sup>1</sup>H NMR 400MHz

6.984  
6.963  
6.558  
6.552  
6.537  
6.531  
6.441  
6.434

2.695  
2.680  
2.664  
2.629  
2.615  
2.612  
2.607  
2.606  
2.596

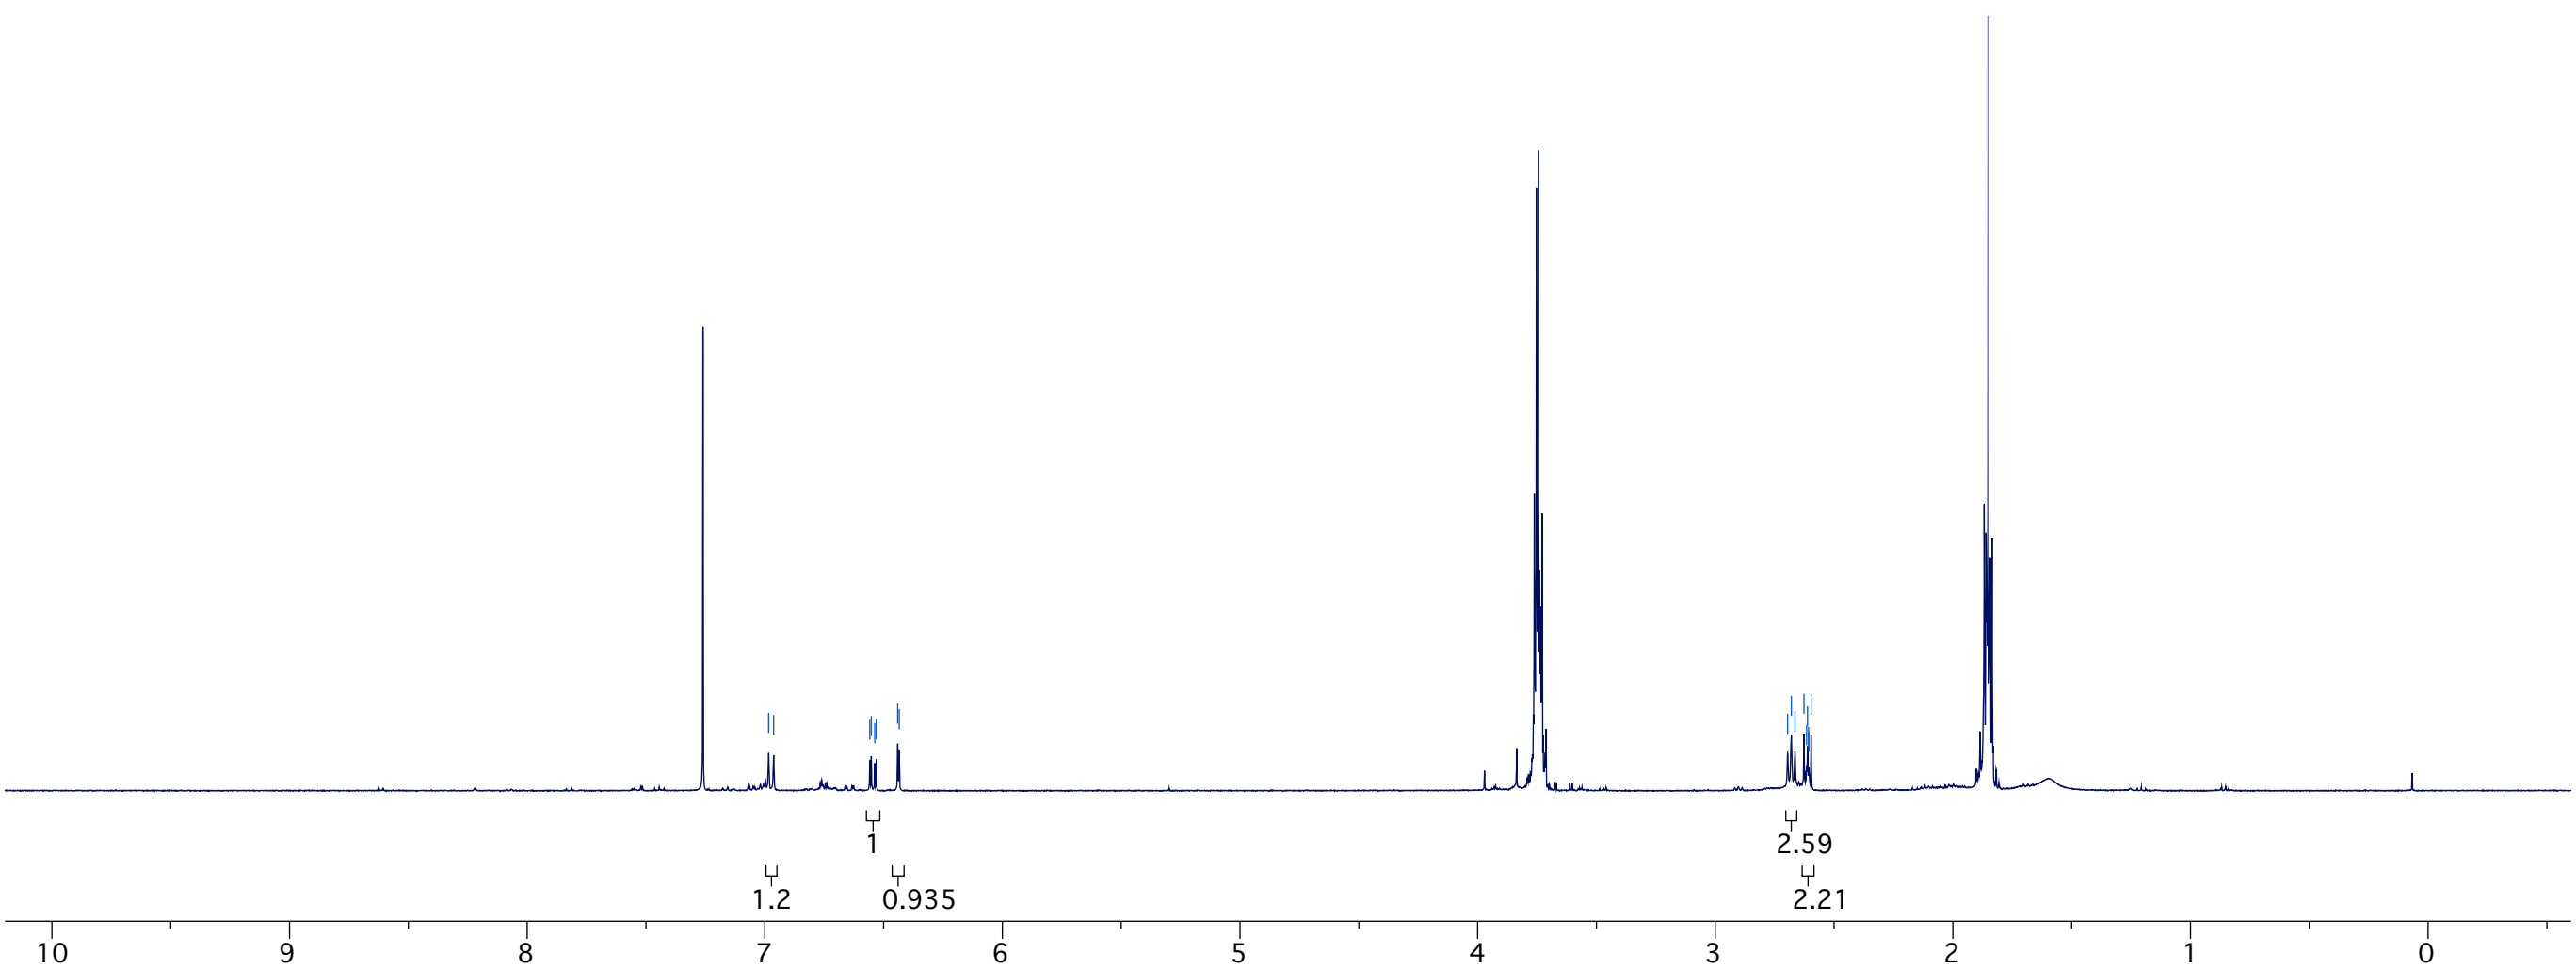

Supplement: Supplementary file 1 [file 4160911]
